# Supplementary material for: Fam20C Regulates Bone Resorption and Breast Cancer Bone Metastasis through Osteopontin and BMP4
Source: Oxford University Press journal article supplement (doi:10.1158/0008-5472.can-20-3328), 2021-08-25
Supplement: 00085472can203328-sup-253055_3_supp_7324071_qxs9x8.xlsx [file 00085472can203328-sup-253055_3_supp_7324071_qxs9x8.xlsx]

## Sheet: Label_free
	Sample information		Protein amount before phosphopetide enrichment
	Sample_779257	WT	600 μg
	Sample_779258	Fam20C-VavCre	600 μg
Protein FDR Confidence: Combined	Master	Accession	Description	Coverage [%]	# PSMs	MW [kDa]	Abundance: 779257	Abundance: 779258	Found in Sample_779257	Found in Sample_779258
High	Master Protein	Q9QXS1	Plectin OS=Mus musculus OX=10090 GN=Plec PE=1 SV=3	55	423	533.9	4.77017e+08	4.58014e+08	High	High
High	Master Protein	E9Q616	AHNAK nucleoprotein (desmoyokin) OS=Mus musculus OX=10090 GN=Ahnak PE=1 SV=1	72	412	603.9	7.45887e+08	6.63021e+08	High	High
High	Master Protein	P08226	Apolipoprotein E OS=Mus musculus OX=10090 GN=Apoe PE=1 SV=2	68	366	35.8	4.43953e+09	3.99933e+09	High	High
High	Master Protein	Q9JHU4	Cytoplasmic dynein 1 heavy chain 1 OS=Mus musculus OX=10090 GN=Dync1h1 PE=1 SV=2	44	305	531.7	2.97833e+08	2.72587e+08	High	High
High	Master Protein	Q61233	Plastin-2 OS=Mus musculus OX=10090 GN=Lcp1 PE=1 SV=4	87	287	70.1	2.18703e+09	2.04697e+09	High	High
High	Master Protein	Q8BTM8	Filamin-A OS=Mus musculus OX=10090 GN=Flna PE=1 SV=5	62	283	281	9.05428e+08	8.49471e+08	High	High
High	Master Protein	P52480	Pyruvate kinase PKM OS=Mus musculus OX=10090 GN=Pkm PE=1 SV=4	79	268	57.8	1.27616e+09	1.14761e+09	High	High
High	Master Protein	P26039	Talin-1 OS=Mus musculus OX=10090 GN=Tln1 PE=1 SV=2	61	251	269.7	4.17413e+08	3.64297e+08	High	High
High	Master Protein	P10126	Elongation factor 1-alpha 1 OS=Mus musculus OX=10090 GN=Eef1a1 PE=1 SV=3	59	243	50.1	9.23126e+08	7.77457e+08	High	High
High	Master Protein	Q8BFZ3	Beta-actin-like protein 2 OS=Mus musculus OX=10090 GN=Actbl2 PE=1 SV=1	43	232	42	1.68927e+07	3.40682e+07	High	High
High	Master Protein	P26041	Moesin OS=Mus musculus OX=10090 GN=Msn PE=1 SV=3	80	222	67.7	1.07395e+09	1.05003e+09	High	High
High	Master Protein	P20152	Vimentin OS=Mus musculus OX=10090 GN=Vim PE=1 SV=3	76	218	53.7	1.61434e+09	1.58302e+09	High	High
High	Master Protein	Q9JKF1	Ras GTPase-activating-like protein IQGAP1 OS=Mus musculus OX=10090 GN=Iqgap1 PE=1 SV=2	60	213	188.6	5.64648e+08	5.42743e+08	High	High
High	Master Protein	P63017	Heat shock cognate 71 kDa protein OS=Mus musculus OX=10090 GN=Hspa8 PE=1 SV=1	75	211	70.8	9.92574e+08	8.56522e+08	High	High
High	Master Protein	Q68FD5	Clathrin heavy chain 1 OS=Mus musculus OX=10090 GN=Cltc PE=1 SV=3	58	183	191.4	4.46646e+08	3.93399e+08	High	High
High	Master Protein	P21460	Cystatin-C OS=Mus musculus OX=10090 GN=Cst3 PE=1 SV=2	61	183	15.5	2.95517e+08	3.37121e+08	High	High
High	Master Protein	P58252	Elongation factor 2 OS=Mus musculus OX=10090 GN=Eef2 PE=1 SV=2	71	179	95.3	7.83638e+08	7.22084e+08	High	High
High	Master Protein	P11499	Heat shock protein HSP 90-beta OS=Mus musculus OX=10090 GN=Hsp90ab1 PE=1 SV=3	68	175	83.2	7.05027e+08	6.37007e+08	High	High
High	Master Protein	P16110	Galectin-3 OS=Mus musculus OX=10090 GN=Lgals3 PE=1 SV=3	39	170	27.5	1.33116e+09	1.08075e+09	High	High
High	Master Protein	P62962	Profilin-1 OS=Mus musculus OX=10090 GN=Pfn1 PE=1 SV=2	74	164	14.9	7.71505e+08	6.57791e+08	High	High
High	Master Protein	P07901	Heat shock protein HSP 90-alpha OS=Mus musculus OX=10090 GN=Hsp90aa1 PE=1 SV=4	61	163	84.7	2.10587e+08	2.04004e+08	High	High
High	Master Protein	P05064	Fructose-bisphosphate aldolase A OS=Mus musculus OX=10090 GN=Aldoa PE=1 SV=2	90	160	39.3	48721536	52353882	High	High
High	Master Protein	A6ZI44	Fructose-bisphosphate aldolase OS=Mus musculus OX=10090 GN=Aldoa PE=1 SV=1	80	158	45.1	7.36679e+08	7.16463e+08	High	High
High	Master Protein	P19096	Fatty acid synthase OS=Mus musculus OX=10090 GN=Fasn PE=1 SV=2	46	157	272.3	1.62898e+08	1.46766e+08	High	High
High	Master Protein	P16045	Galectin-1 OS=Mus musculus OX=10090 GN=Lgals1 PE=1 SV=3	76	150	14.9	5.16244e+08	4.62024e+08	High	High
High	Master Protein	Q9DCD0	6-phosphogluconate dehydrogenase, decarboxylating OS=Mus musculus OX=10090 GN=Pgd PE=1 SV=3	86	149	53.2	9.75396e+08	9.37905e+08	High	High
High	Master Protein	Q01853	Transitional endoplasmic reticulum ATPase OS=Mus musculus OX=10090 GN=Vcp PE=1 SV=4	71	149	89.3	5.43809e+08	5.06277e+08	High	High
High	Master Protein	P40142	Transketolase OS=Mus musculus OX=10090 GN=Tkt PE=1 SV=1	65	144	67.6	8.09775e+08	6.99313e+08	High	High
High	Master Protein	P10605	Cathepsin B OS=Mus musculus OX=10090 GN=Ctsb PE=1 SV=2	56	140	37.3	1.01725e+09	1.1763e+09	High	High
High	Master Protein	P35700	Peroxiredoxin-1 OS=Mus musculus OX=10090 GN=Prdx1 PE=1 SV=1	92	140	22.2	2.3986e+09	2.29205e+09	High	High
High	Master Protein	P57780	Alpha-actinin-4 OS=Mus musculus OX=10090 GN=Actn4 PE=1 SV=1	73	139	104.9	3.39468e+08	3.40113e+08	High	High
High	Master Protein	P01027	Complement C3 OS=Mus musculus OX=10090 GN=C3 PE=1 SV=3	59	133	186.4	1.78852e+08	1.76225e+08	High	High
High	Master Protein	Q8VDD5	Myosin-9 OS=Mus musculus OX=10090 GN=Myh9 PE=1 SV=4	42	133	226.2	1.09887e+08	9.37097e+07	High	High
High	Master Protein	P17742	Peptidyl-prolyl cis-trans isomerase A OS=Mus musculus OX=10090 GN=Ppia PE=1 SV=2	71	133	18	1.43205e+09	1.33535e+09	High	High
High	Master Protein	Q8BH61	Coagulation factor XIII A chain OS=Mus musculus OX=10090 GN=F13a1 PE=1 SV=3	55	129	83.2	3.63588e+08	3.74575e+08	High	High
High	Master Protein	P17182	Alpha-enolase OS=Mus musculus OX=10090 GN=Eno1 PE=1 SV=3	77	126	47.1	5.37293e+08	5.0828e+08	High	High
High	Master Protein	Q9DBJ1	Phosphoglycerate mutase 1 OS=Mus musculus OX=10090 GN=Pgam1 PE=1 SV=3	78	124	28.8	3.85814e+08	3.89625e+08	High	High
High	Master Protein	P62806	Histone H4 OS=Mus musculus OX=10090 GN=H4c1 PE=1 SV=2	57	117	11.4	1.89258e+09	1.59243e+09	High	High
High	Master Protein	Q62261	Spectrin beta chain, non-erythrocytic 1 OS=Mus musculus OX=10090 GN=Sptbn1 PE=1 SV=2	41	116	274.1	4.72834e+07	4.08964e+07	High	High
High	Master Protein	P08905	Lysozyme C-2 OS=Mus musculus OX=10090 GN=Lyz2 PE=1 SV=2	67	113	16.7	2.49343e+09	2.79977e+09	High	High
High	Master Protein	P40124	Adenylyl cyclase-associated protein 1 OS=Mus musculus OX=10090 GN=Cap1 PE=1 SV=4	77	112	51.5	3.64148e+08	3.64087e+08	High	High
High	Master Protein	P06745	Glucose-6-phosphate isomerase OS=Mus musculus OX=10090 GN=Gpi PE=1 SV=4	70	111	62.7	6.22448e+08	6.24392e+08	High	High
High	Master Protein	Q61598	Rab GDP dissociation inhibitor beta OS=Mus musculus OX=10090 GN=Gdi2 PE=1 SV=1	82	110	50.5	6.25312e+08	5.98146e+08	High	High
High	Master Protein	E9Q447	Spectrin alpha chain, non-erythrocytic 1 OS=Mus musculus OX=10090 GN=Sptan1 PE=1 SV=1	37	110	285.2	5.14711e+07	4.94832e+07	High	Not Found
High	Master Protein	P16546	Spectrin alpha chain, non-erythrocytic 1 OS=Mus musculus OX=10090 GN=Sptan1 PE=1 SV=4	37	110	284.4	504283	701332	High	High
High	Master Protein	O88569	Heterogeneous nuclear ribonucleoproteins A2/B1 OS=Mus musculus OX=10090 GN=Hnrnpa2b1 PE=1 SV=2	72	108	37.4	3.78049e+08	3.52016e+08	High	High
High	Master Protein	Q64475	Histone H2B type 1-B OS=Mus musculus OX=10090 GN=Hist1h2bb PE=1 SV=3	53	108	13.9	1.54264e+09	1.33918e+09	High	High
High	Master Protein	P09411	Phosphoglycerate kinase 1 OS=Mus musculus OX=10090 GN=Pgk1 PE=1 SV=4	69	108	44.5	3.86478e+08	3.72922e+08	High	High
High	Master Protein	P62259	14-3-3 protein epsilon OS=Mus musculus OX=10090 GN=Ywhae PE=1 SV=1	84	107	29.2	4.82412e+08	4.63567e+08	High	High
High	Master Protein	F6WR04	Cathepsin S OS=Mus musculus OX=10090 GN=Ctss PE=1 SV=1	49	106	38.6	2.6757e+08	2.94668e+08	High	High
High	Master Protein	P99024	Tubulin beta-5 chain OS=Mus musculus OX=10090 GN=Tubb5 PE=1 SV=1	67	102	49.6	4.06105e+08	3.65068e+08	High	High
High	Master Protein	A0A0A0MQF6	Glyceraldehyde-3-phosphate dehydrogenase OS=Mus musculus OX=10090 GN=Gapdh PE=1 SV=1	61	100	38.6	4.71693e+08	4.14746e+08	High	High
High	Master Protein	P26043	Radixin OS=Mus musculus OX=10090 GN=Rdx PE=1 SV=3	53	100	68.5	3.32138e+07	3.41164e+07	High	High
High	Master Protein	Q61830	Macrophage mannose receptor 1 OS=Mus musculus OX=10090 GN=Mrc1 PE=1 SV=2	34	98	164.9	1.35991e+08	1.33034e+08	High	High
High	Master Protein	Q9CQI6	Coactosin-like protein OS=Mus musculus OX=10090 GN=Cotl1 PE=1 SV=3	75	96	15.9	4.7117e+08	4.31528e+08	High	High
High	Master Protein	O88342	WD repeat-containing protein 1 OS=Mus musculus OX=10090 GN=Wdr1 PE=1 SV=3	67	96	66.4	2.98653e+08	2.71684e+08	High	High
High	Master Protein	P06151	L-lactate dehydrogenase A chain OS=Mus musculus OX=10090 GN=Ldha PE=1 SV=3	71	95	36.5	6.72423e+08	6.4562e+08	High	High
High	Master Protein	P50516	V-type proton ATPase catalytic subunit A OS=Mus musculus OX=10090 GN=Atp6v1a PE=1 SV=2	79	95	68.3	1.83615e+08	171691267	High	High
High	Master Protein	P68372	Tubulin beta-4B chain OS=Mus musculus OX=10090 GN=Tubb4b PE=1 SV=1	63	94	49.8	2.03087e+07	1.82354e+07	High	High
High	Master Protein	Q923D2	Flavin reductase (NADPH) OS=Mus musculus OX=10090 GN=Blvrb PE=1 SV=3	77	93	22.2	3.55032e+08	3.36359e+08	High	High
High	Master Protein	A0A0R4J0I9	Prolow-density lipoprotein receptor-related protein 1 OS=Mus musculus OX=10090 GN=Lrp1 PE=1 SV=1	15	93	504.4	7.07987e+07	7.4067e+07	High	High
High	Master Protein	Q921I1	Serotransferrin OS=Mus musculus OX=10090 GN=Tf PE=1 SV=1	47	93	76.7	3.25004e+08	2.96553e+08	High	High
High	Master Protein	Q93092	Transaldolase OS=Mus musculus OX=10090 GN=Taldo1 PE=1 SV=2	54	92	37.4	3.73335e+08	3.33132e+08	High	High
High	Master Protein	A8DUK4	Beta-globin OS=Mus musculus OX=10090 GN=Hbb-bs PE=1 SV=1	96	91	15.7	7.04902e+08	6.33217e+08	High	High
High	Master Protein	Q8BL66	Early endosome antigen 1 OS=Mus musculus OX=10090 GN=Eea1 PE=1 SV=2	44	91	160.8	4.3316e+07	3.94285e+07	High	High
High	Master Protein	Q543K9	Purine nucleoside phosphorylase OS=Mus musculus OX=10090 GN=Pnp PE=1 SV=1	84	91	32.2	3.35652e+08	3.34094e+08	High	High
High	Master Protein	P63101	14-3-3 protein zeta/delta OS=Mus musculus OX=10090 GN=Ywhaz PE=1 SV=1	84	89	27.8	2.97599e+08	3.05141e+08	High	High
High	Master Protein	P48678	Prelamin-A/C OS=Mus musculus OX=10090 GN=Lmna PE=1 SV=2	68	89	74.2	1.51284e+08	1.42961e+08	High	High
High	Master Protein	O08553	Dihydropyrimidinase-related protein 2 OS=Mus musculus OX=10090 GN=Dpysl2 PE=1 SV=2	68	88	62.2	2.39425e+08	2.17844e+08	High	High
High	Master Protein	Q7TMM9	Tubulin beta-2A chain OS=Mus musculus OX=10090 GN=Tubb2a PE=1 SV=1	63	88	49.9	1.76633e+07	1.58685e+07	High	High
High	Master Protein	Q7TPR4	Alpha-actinin-1 OS=Mus musculus OX=10090 GN=Actn1 PE=1 SV=1	66	86	103	4.00438e+07	3.35001e+07	High	High
High	Master Protein	Q99LB4	Capping protein (Actin filament), gelsolin-like OS=Mus musculus OX=10090 GN=Capg PE=1 SV=1	64	86	38.7	4.7768e+08	4.76766e+08	High	High
High	Master Protein	P26040	Ezrin OS=Mus musculus OX=10090 GN=Ezr PE=1 SV=3	51	86	69.4	2.94557e+07	2.91738e+07	High	High
High	Master Protein	P13020	Gelsolin OS=Mus musculus OX=10090 GN=Gsn PE=1 SV=3	55	86	85.9	2.35724e+08	206676476	High	High
High	Master Protein	Q9D1A2	Cytosolic non-specific dipeptidase OS=Mus musculus OX=10090 GN=Cndp2 PE=1 SV=1	70	85	52.7	2.84266e+08	257664857	High	High
High	Master Protein	P23116	Eukaryotic translation initiation factor 3 subunit A OS=Mus musculus OX=10090 GN=Eif3a PE=1 SV=5	41	85	161.8	6.64135e+07	5.9391e+07	High	High
High	Master Protein	Q9CPQ9	Fructose-bisphosphate aldolase OS=Mus musculus OX=10090 GN=Aldoart1 PE=1 SV=1	53	84	39.3		270105	High	High
High	Master Protein	A2AVJ7	Ribosome-binding protein 1 OS=Mus musculus OX=10090 GN=Rrbp1 PE=1 SV=1	49	84	158.3	1.22525e+08	1.04049e+08	High	High
High	Master Protein	Q02053	Ubiquitin-like modifier-activating enzyme 1 OS=Mus musculus OX=10090 GN=Uba1 PE=1 SV=1	54	83	117.7	1.2855e+08	1.11321e+08	High	High
High	Master Protein	D3Z2H9	Tropomyosin 3, related sequence 7 OS=Mus musculus OX=10090 GN=Tpm3-rs7 PE=3 SV=1	80	82	29	4.12006e+08	3.82925e+08	High	High
High	Master Protein	Q3V117	ATP-citrate synthase OS=Mus musculus OX=10090 GN=Acly PE=1 SV=1	50	81	120.7	1.01591e+08	8.99343e+07	High	High
High	Master Protein	P18760	Cofilin-1 OS=Mus musculus OX=10090 GN=Cfl1 PE=1 SV=3	82	81	18.5	7.45875e+08	6.69641e+08	High	High
High	Master Protein	Q3U2G2	Heat shock 70 kDa protein 4 OS=Mus musculus OX=10090 GN=Hspa4 PE=1 SV=1	63	81	94.1	1.31369e+08	1.26426e+08	High	High
High	Master Protein	P14733	Lamin-B1 OS=Mus musculus OX=10090 GN=Lmnb1 PE=1 SV=3	67	79	66.7	1.04753e+08	9.32899e+07	High	High
High	Master Protein	Q9WU78	Programmed cell death 6-interacting protein OS=Mus musculus OX=10090 GN=Pdcd6ip PE=1 SV=3	58	78	96	6.81647e+07	6.42621e+07	High	High
High	Master Protein	P01887	Beta-2-microglobulin OS=Mus musculus OX=10090 GN=B2m PE=1 SV=2	73	77	13.8	6.50815e+08	7.97767e+08	High	High
High	Master Protein	O88844	Isocitrate dehydrogenase [NADP] cytoplasmic OS=Mus musculus OX=10090 GN=Idh1 PE=1 SV=2	56	77	46.6	3.19453e+08	2.64698e+08	High	High
High	Master Protein	Q02819	Nucleobindin-1 OS=Mus musculus OX=10090 GN=Nucb1 PE=1 SV=2	75	77	53.4	1.53416e+08	1.65742e+08	High	High
High	Master Protein	Q9CQV8	14-3-3 protein beta/alpha OS=Mus musculus OX=10090 GN=Ywhab PE=1 SV=3	73	76	28.1	5.42135e+07	5.12784e+07	High	High
High	Master Protein	P09405	Nucleolin OS=Mus musculus OX=10090 GN=Ncl PE=1 SV=2	40	76	76.7	1.95393e+08	1.84209e+08	High	High
High	Master Protein	Q00612	Glucose-6-phosphate 1-dehydrogenase X OS=Mus musculus OX=10090 GN=G6pdx PE=1 SV=3	68	74	59.2	1.9646e+08	1.73738e+08	High	High
High	Master Protein	Q9EQH3	Vacuolar protein sorting-associated protein 35 OS=Mus musculus OX=10090 GN=Vps35 PE=1 SV=1	48	74	91.7	1.1362e+08	1.06186e+08	High	High
High	Master Protein	P61982	14-3-3 protein gamma OS=Mus musculus OX=10090 GN=Ywhag PE=1 SV=2	82	73	28.3	1.58845e+08	1.53362e+08	High	High
High	Master Protein	Q8CIH5	1-phosphatidylinositol 4,5-bisphosphate phosphodiesterase gamma-2 OS=Mus musculus OX=10090 GN=Plcg2 PE=1 SV=1	47	73	147.5	4.64175e+07	4.18731e+07	High	High
High	Master Protein	Q9JII6	Aldo-keto reductase family 1 member A1 OS=Mus musculus OX=10090 GN=Akr1a1 PE=1 SV=3	69	73	36.6	5.14949e+08	4.49708e+08	High	High
High	Master Protein	Q04447	Creatine kinase B-type OS=Mus musculus OX=10090 GN=Ckb PE=1 SV=1	69	73	42.7	2.29639e+08	2.14283e+08	High	High
High	Master Protein	E9PZF0	Nucleoside diphosphate kinase OS=Mus musculus OX=10090 GN=Gm20390 PE=3 SV=1	79	73	30.2	5.17213e+08	4.80534e+08	High	High
High	Master Protein	P68510	14-3-3 protein eta OS=Mus musculus OX=10090 GN=Ywhah PE=1 SV=2	58	72	28.2	7.73665e+07	7.50042e+07	High	High
High	Master Protein	P18242	Cathepsin D OS=Mus musculus OX=10090 GN=Ctsd PE=1 SV=1	46	72	44.9	5.79277e+08	5.28227e+08	High	High
High	Master Protein	K3W4L3	Prosaposin OS=Mus musculus OX=10090 GN=Psap PE=1 SV=1	35	72	61.3	4.72687e+08	5.08492e+08	High	High
High	Master Protein	Q60854	Serpin B6 OS=Mus musculus OX=10090 GN=Serpinb6 PE=1 SV=1	81	72	42.6	2.14887e+08	2.03965e+08	High	High
High	Master Protein	D3Z6I8	Tropomyosin alpha-3 chain OS=Mus musculus OX=10090 GN=Tpm3 PE=1 SV=1	64	72	28.7	3.91044e+07	3.99856e+07	High	High
High	Master Protein	Q9WVK4	EH domain-containing protein 1 OS=Mus musculus OX=10090 GN=Ehd1 PE=1 SV=1	72	71	60.6	1.0367e+08	7.42928e+07	High	High
High	Master Protein	Q99KC8	von Willebrand factor A domain-containing protein 5A OS=Mus musculus OX=10090 GN=Vwa5a PE=1 SV=2	47	70	87.1	1.24186e+08	1.2566e+08	High	High
High	Master Protein	Q8CIE6	Coatomer subunit alpha OS=Mus musculus OX=10090 GN=Copa PE=1 SV=2	43	69	138.3	7.49999e+07	6.87415e+07	High	High
High	Master Protein	Q7TMB8	Cytoplasmic FMR1-interacting protein 1 OS=Mus musculus OX=10090 GN=Cyfip1 PE=1 SV=1	38	69	145.1	5.68347e+07	5.16348e+07	High	High
High	Master Protein	P20029	Endoplasmic reticulum chaperone BiP OS=Mus musculus OX=10090 GN=Hspa5 PE=1 SV=3	52	69	72.4	5.01927e+07	4.68579e+07	High	High
High	Master Protein	P31725	Protein S100-A9 OS=Mus musculus OX=10090 GN=S100a9 PE=1 SV=3	80	69	13	3.51624e+08	3.86695e+08	High	High
High	Master Protein	G3X973	Stabilin-1 OS=Mus musculus OX=10090 GN=Stab1 PE=1 SV=1	19	69	276.3	7.81132e+07	6.37949e+07	High	High
High	Master Protein	P29351	Tyrosine-protein phosphatase non-receptor type 6 OS=Mus musculus OX=10090 GN=Ptpn6 PE=1 SV=2	58	69	67.5	2.39027e+08	2.15458e+08	High	High
High	Master Protein	F6TVP2	Deoxynucleoside triphosphate triphosphohydrolase SAMHD1 (Fragment) OS=Mus musculus OX=10090 GN=Samhd1 PE=1 SV=1	64	68	72.8	475353	431222	High	High
High	Master Protein	Q60710	Deoxynucleoside triphosphate triphosphohydrolase SAMHD1 OS=Mus musculus OX=10090 GN=Samhd1 PE=1 SV=3	59	68	75.8	1.99131e+08	2.06225e+08	High	High
High	Master Protein	Q99PT1	Rho GDP-dissociation inhibitor 1 OS=Mus musculus OX=10090 GN=Arhgdia PE=1 SV=3	67	68	23.4	3.75398e+08	3.76914e+08	High	High
High	Master Protein	Q6ZQ38	Cullin-associated NEDD8-dissociated protein 1 OS=Mus musculus OX=10090 GN=Cand1 PE=1 SV=2	39	67	136.2	6.8631e+07	6.93483e+07	High	High
High	Master Protein	P27773	Protein disulfide-isomerase A3 OS=Mus musculus OX=10090 GN=Pdia3 PE=1 SV=2	63	67	56.6	6.75405e+07	7.17251e+07	High	High
High	Master Protein	A2AMW0	F-actin-capping protein subunit beta OS=Mus musculus OX=10090 GN=Capzb PE=1 SV=1	80	66	29.3	1.48312e+08	1.32383e+08	High	High
High	Master Protein	Q5SVG5	AP complex subunit beta OS=Mus musculus OX=10090 GN=Ap1b1 PE=1 SV=1	52	65	101.1	1.49391e+08	1.2534e+08	High	High
High	Master Protein	Q9DBG3	AP-2 complex subunit beta OS=Mus musculus OX=10090 GN=Ap2b1 PE=1 SV=1	46	65	104.5	6.30126e+07	5.73352e+07	High	High
High	Master Protein	E9Q7G0	Nuclear mitotic apparatus protein 1 OS=Mus musculus OX=10090 GN=Numa1 PE=1 SV=1	28	65	235.5	1.79535e+07	1.5884e+07	High	High
High	Master Protein	Q9WVA4	Transgelin-2 OS=Mus musculus OX=10090 GN=Tagln2 PE=1 SV=4	84	65	22.4	2.42226e+08	2.41421e+08	High	High
High	Master Protein	P24270	Catalase OS=Mus musculus OX=10090 GN=Cat PE=1 SV=4	70	64	59.8	1.92316e+08	1.51972e+08	High	High
High	Master Protein	P17427	AP-2 complex subunit alpha-2 OS=Mus musculus OX=10090 GN=Ap2a2 PE=1 SV=2	45	63	104	1.24578e+08	1.03939e+08	High	High
High	Master Protein	O09159	Lysosomal alpha-mannosidase OS=Mus musculus OX=10090 GN=Man2b1 PE=1 SV=4	36	63	114.6	9.03487e+07	9.51835e+07	High	High
High	Master Protein	Q60864	Stress-induced-phosphoprotein 1 OS=Mus musculus OX=10090 GN=Stip1 PE=1 SV=1	54	63	62.5	1.06676e+08	1.11176e+08	High	High
High	Master Protein	Q99KK7	Dipeptidyl peptidase 3 OS=Mus musculus OX=10090 GN=Dpp3 PE=1 SV=2	63	62	82.8	7.20167e+07	6.58972e+07	High	High
High	Master Protein	Q9ET01	Glycogen phosphorylase, liver form OS=Mus musculus OX=10090 GN=Pygl PE=1 SV=4	48	62	97.4	6.27308e+07	5.83114e+07	High	High
High	Master Protein	Q9CWK8	Sorting nexin-2 OS=Mus musculus OX=10090 GN=Snx2 PE=1 SV=2	56	62	58.4	1.11388e+08	1.06825e+08	High	High
High	Master Protein	Q8VCT3	Aminopeptidase B OS=Mus musculus OX=10090 GN=Rnpep PE=1 SV=2	61	61	72.4	9.45548e+07	9.2079e+07	High	High
High	Master Protein	P63158	High mobility group protein B1 OS=Mus musculus OX=10090 GN=Hmgb1 PE=1 SV=2	54	61	24.9	1.39187e+08	1.18698e+08	High	High
High	Master Protein	P80314	T-complex protein 1 subunit beta OS=Mus musculus OX=10090 GN=Cct2 PE=1 SV=4	72	61	57.4	1.03043e+08	9.64289e+07	High	High
High	Master Protein	P10649	Glutathione S-transferase Mu 1 OS=Mus musculus OX=10090 GN=Gstm1 PE=1 SV=2	73	60	26	3.34161e+08	2.83125e+08	High	High
High	Master Protein	Q61599	Rho GDP-dissociation inhibitor 2 OS=Mus musculus OX=10090 GN=Arhgdib PE=1 SV=3	82	60	22.8	1.73017e+08	1.56238e+08	High	High
High	Master Protein	Q9EQP2	EH domain-containing protein 4 OS=Mus musculus OX=10090 GN=Ehd4 PE=1 SV=1	58	59	61.4	9.41854e+07	7.61894e+07	High	High
High	Master Protein	Q3TRM8	Hexokinase-3 OS=Mus musculus OX=10090 GN=Hk3 PE=1 SV=2	43	59	100	1.15173e+08	1.09006e+08	High	High
High	Master Protein	A0A1C7CYV0	Plastin-3 (Fragment) OS=Mus musculus OX=10090 GN=Pls3 PE=1 SV=1	23	59	70.6	2.19407e+06	2.29713e+06	High	High
High	Master Protein	Q78PY7	Staphylococcal nuclease domain-containing protein 1 OS=Mus musculus OX=10090 GN=Snd1 PE=1 SV=1	47	59	102	1.16829e+08	4.85736e+07	High	High
High	Master Protein	P68369	Tubulin alpha-1A chain OS=Mus musculus OX=10090 GN=Tuba1a PE=1 SV=1	53	59	50.1	2.97194e+08	2.72696e+08	High	High
High	Master Protein	Q8K1B8	Fermitin family homolog 3 OS=Mus musculus OX=10090 GN=Fermt3 PE=1 SV=1	49	58	75.6	1.48895e+08	1.39551e+08	High	High
High	Master Protein	P49710	Hematopoietic lineage cell-specific protein OS=Mus musculus OX=10090 GN=Hcls1 PE=1 SV=2	52	58	54.2	7.35899e+07	7.60898e+07	High	High
High	Master Protein	P70168	Importin subunit beta-1 OS=Mus musculus OX=10090 GN=Kpnb1 PE=1 SV=2	47	58	97.1	8.27766e+07	7.90425e+07	High	High
High	Master Protein	P55065	Phospholipid transfer protein OS=Mus musculus OX=10090 GN=Pltp PE=1 SV=1	53	58	54.4	3.18788e+08	3.3892e+08	High	High
High	Master Protein	Q60963	Platelet-activating factor acetylhydrolase OS=Mus musculus OX=10090 GN=Pla2g7 PE=2 SV=2	60	58	49.2	2.16955e+08	2.12521e+08	High	High
High	Master Protein	P80318	T-complex protein 1 subunit gamma OS=Mus musculus OX=10090 GN=Cct3 PE=1 SV=1	62	58	60.6	8.7102e+07	7.61673e+07	High	High
High	Master Protein	Q8VDM4	26S proteasome non-ATPase regulatory subunit 2 OS=Mus musculus OX=10090 GN=Psmd2 PE=1 SV=1	52	57	100.1	6.22231e+07	5.70804e+07	High	High
High	Master Protein	P12265	Beta-glucuronidase OS=Mus musculus OX=10090 GN=Gusb PE=1 SV=2	46	57	74.1	9.5556e+07	8.78113e+07	High	High
High	Master Protein	P49312	Heterogeneous nuclear ribonucleoprotein A1 OS=Mus musculus OX=10090 GN=Hnrnpa1 PE=1 SV=2	57	57	34.2	1.01152e+08	1.0563e+08	High	High
High	Master Protein	P24527	Leukotriene A-4 hydrolase OS=Mus musculus OX=10090 GN=Lta4h PE=1 SV=4	62	57	69	1.13075e+08	1.03438e+08	High	High
High	Master Protein	Q8C3V4	Signal transducer and activator of transcription OS=Mus musculus OX=10090 GN=Stat1 PE=1 SV=1	40	57	87.3	5.85679e+07	5.33623e+07	High	High
High	Master Protein	P42932	T-complex protein 1 subunit theta OS=Mus musculus OX=10090 GN=Cct8 PE=1 SV=3	64	57	59.5	1.0558e+08	9.28024e+07	High	High
High	Master Protein	P15532	Nucleoside diphosphate kinase A OS=Mus musculus OX=10090 GN=Nme1 PE=1 SV=1	80	56	17.2	2.17299e+07	1.99033e+07	High	High
High	Master Protein	Q6GT24	Peroxiredoxin-6 OS=Mus musculus OX=10090 GN=Prdx6 PE=1 SV=1	81	56	24.8	2.81005e+08	2.69067e+08	High	High
High	Master Protein	Q64727	Vinculin OS=Mus musculus OX=10090 GN=Vcl PE=1 SV=4	39	56	116.6	3.76076e+07	3.64333e+07	High	High
High	Master Protein	A2AN08	E3 ubiquitin-protein ligase UBR4 OS=Mus musculus OX=10090 GN=Ubr4 PE=1 SV=1	10	55	571.9	1.63272e+07	1.6059e+07	High	High
High	Master Protein	P09581	Macrophage colony-stimulating factor 1 receptor OS=Mus musculus OX=10090 GN=Csf1r PE=1 SV=3	30	55	109.1	2.16449e+08	2.18118e+08	High	High
High	Master Protein	Q6A028	Switch-associated protein 70 OS=Mus musculus OX=10090 GN=Swap70 PE=1 SV=2	57	55	69	3.31962e+07	3.44977e+07	High	High
High	Master Protein	P80316	T-complex protein 1 subunit epsilon OS=Mus musculus OX=10090 GN=Cct5 PE=1 SV=1	62	55	59.6	8.90959e+07	8.182e+07	High	High
High	Master Protein	Q62351	Transferrin receptor protein 1 OS=Mus musculus OX=10090 GN=Tfrc PE=1 SV=1	44	55	85.7	9.0601e+07	8.57096e+07	High	High
High	Master Protein	Q64514	Tripeptidyl-peptidase 2 OS=Mus musculus OX=10090 GN=Tpp2 PE=1 SV=3	35	55	139.8	3.90023e+07	3.66794e+07	High	High
High	Master Protein	P62814	V-type proton ATPase subunit B, brain isoform OS=Mus musculus OX=10090 GN=Atp6v1b2 PE=1 SV=1	66	55	56.5	8.86954e+07	7.75855e+07	High	High
High	Master Protein	P60843	Eukaryotic initiation factor 4A-I OS=Mus musculus OX=10090 GN=Eif4a1 PE=1 SV=1	62	54	46.1	1.07993e+08	1.0188e+08	High	High
High	Master Protein	B2M1R6	Heterogeneous nuclear ribonucleoprotein K OS=Mus musculus OX=10090 GN=Hnrnpk PE=1 SV=1	53	54	48.5	1.1641e+08	9.93401e+07	High	High
High	Master Protein	P27546	Microtubule-associated protein 4 OS=Mus musculus OX=10090 GN=Map4 PE=1 SV=3	38	54	117.4	1.89879e+07	2.22241e+07	High	High
High	Master Protein	Q99KQ4	Nicotinamide phosphoribosyltransferase OS=Mus musculus OX=10090 GN=Nampt PE=1 SV=1	64	54	55.4	8.81341e+07	8.04327e+07	High	High
High	Master Protein	P29341	Polyadenylate-binding protein 1 OS=Mus musculus OX=10090 GN=Pabpc1 PE=1 SV=2	46	54	70.6	9.00881e+07	7.96699e+07	High	High
High	Master Protein	G5E866	Splicing factor 3B subunit 1 OS=Mus musculus OX=10090 GN=Sf3b1 PE=1 SV=1	41	54	145.7	3.07861e+07	2.55966e+07	High	High
High	Master Protein	Q8VIJ6	Splicing factor, proline- and glutamine-rich OS=Mus musculus OX=10090 GN=Sfpq PE=1 SV=1	42	54	75.4	6.10589e+07	5.76039e+07	High	High
High	Master Protein	P70429	Ena/VASP-like protein OS=Mus musculus OX=10090 GN=Evl PE=1 SV=2	63	53	44.3	3.7446e+07	3.68781e+07	High	High
High	Master Protein	P0DOV2	Interferon-activable protein 204 OS=Mus musculus OX=10090 GN=Ifi204 PE=1 SV=1	49	53	69.4	6.57282e+07	6.34132e+07	High	High
High	Master Protein	Q9ES52	Phosphatidylinositol 3,4,5-trisphosphate 5-phosphatase 1 OS=Mus musculus OX=10090 GN=Inpp5d PE=1 SV=2	31	53	133.5	2.97548e+07	2.4316e+07	High	High
High	Master Protein	Q6IRU2	Tropomyosin alpha-4 chain OS=Mus musculus OX=10090 GN=Tpm4 PE=1 SV=3	66	53	28.5	6.95931e+07	7.4606e+07	High	High
High	Master Protein	P68254	14-3-3 protein theta OS=Mus musculus OX=10090 GN=Ywhaq PE=1 SV=1	51	52	27.8	2.34005e+07	2.32794e+07	High	High
High	Master Protein	O08784	Treacle protein OS=Mus musculus OX=10090 GN=Tcof1 PE=1 SV=1	32	52	134.9	1.99238e+07	1.82563e+07	High	High
High	Master Protein	Q8JZQ9	Eukaryotic translation initiation factor 3 subunit B OS=Mus musculus OX=10090 GN=Eif3b PE=1 SV=1	50	51	91.3	4.11681e+07	3.91704e+07	High	High
High	Master Protein	Q6P5F9	Exportin-1 OS=Mus musculus OX=10090 GN=Xpo1 PE=1 SV=1	34	51	123	6.41034e+07	6.47364e+07	High	High
High	Master Protein	Q8BKC5	Importin-5 OS=Mus musculus OX=10090 GN=Ipo5 PE=1 SV=3	32	51	123.5	5.73896e+07	5.51699e+07	High	High
High	Master Protein	Q62465	Synaptic vesicle membrane protein VAT-1 homolog OS=Mus musculus OX=10090 GN=Vat1 PE=1 SV=3	53	51	43.1	1.82092e+08	1.54395e+08	High	High
High	Master Protein	Q9JMH6	Thioredoxin reductase 1, cytoplasmic OS=Mus musculus OX=10090 GN=Txnrd1 PE=1 SV=3	45	51	67	1.1214e+08	1.00241e+08	High	High
High	Master Protein	P56399	Ubiquitin carboxyl-terminal hydrolase 5 OS=Mus musculus OX=10090 GN=Usp5 PE=1 SV=1	40	51	95.8	4.95999e+07	4.80114e+07	High	High
High	Master Protein	Q91VB8	Alpha globin 1 OS=Mus musculus OX=10090 GN=Hba-a1 PE=1 SV=1	92	50	15.1	3.45953e+08	2.97702e+08	High	High
High	Master Protein	P17426	AP-2 complex subunit alpha-1 OS=Mus musculus OX=10090 GN=Ap2a1 PE=1 SV=1	42	50	107.6	2.78216e+07	2.49156e+07	High	High
High	Master Protein	Q07797	Galectin-3-binding protein OS=Mus musculus OX=10090 GN=Lgals3bp PE=1 SV=1	38	50	64.5	2.0391e+08	2.20307e+08	High	High
High	Master Protein	Q9R0E2	Procollagen-lysine,2-oxoglutarate 5-dioxygenase 1 OS=Mus musculus OX=10090 GN=Plod1 PE=1 SV=1	50	50	83.5	6.27043e+07	6.62645e+07	High	High
High	Master Protein	Q9QUR6	Prolyl endopeptidase OS=Mus musculus OX=10090 GN=Prep PE=1 SV=1	45	50	80.7	1.15993e+08	1.08627e+08	High	High
High	Master Protein	A0A0A0MQA5	Tubulin alpha chain (Fragment) OS=Mus musculus OX=10090 GN=Tuba4a PE=1 SV=1	44	50	52.9	5.9333e+07	5.08639e+07	High	High
High	Master Protein	Q9CY64	Biliverdin reductase A OS=Mus musculus OX=10090 GN=Blvra PE=1 SV=1	82	49	33.5	1.71566e+08	1.55959e+08	High	High
High	Master Protein	P11983	T-complex protein 1 subunit alpha OS=Mus musculus OX=10090 GN=Tcp1 PE=1 SV=3	63	49	60.4	8.63476e+07	7.08371e+07	High	High
High	Master Protein	P97449	Aminopeptidase N OS=Mus musculus OX=10090 GN=Anpep PE=1 SV=4	42	48	109.6	5.21284e+07	4.45057e+07	High	High
High	Master Protein	Q5XJY5	Coatomer subunit delta OS=Mus musculus OX=10090 GN=Arcn1 PE=1 SV=2	49	48	57.2	3.64723e+07	3.26093e+07	High	High
High	Master Protein	Q3TCR7	Dynamin-2 OS=Mus musculus OX=10090 GN=Dnm2 PE=1 SV=1	46	48	97.9	3.67358e+07	3.38565e+07	High	High
High	Master Protein	A0A171EBL2	E3 ubiquitin-protein ligase RNF213 OS=Mus musculus OX=10090 GN=Rnf213 PE=1 SV=1	8	48	584.3	1.87156e+07	1.58698e+07	High	High
High	Master Protein	O35601	FYN-binding protein 1 OS=Mus musculus OX=10090 GN=Fyb1 PE=1 SV=2	49	48	90	4.63665e+07	5.37213e+07	High	High
High	Master Protein	P30681	High mobility group protein B2 OS=Mus musculus OX=10090 GN=Hmgb2 PE=1 SV=3	61	48	24.1	1.07689e+08	1.3426e+08	High	High
High	Master Protein	Q64345	Interferon-induced protein with tetratricopeptide repeats 3 OS=Mus musculus OX=10090 GN=Ifit3 PE=1 SV=1	53	48	47.2	6.32367e+07	6.11846e+07	High	High
High	Master Protein	Q9D8U8	Sorting nexin-5 OS=Mus musculus OX=10090 GN=Snx5 PE=1 SV=1	53	48	46.8	7.96111e+07	7.13475e+07	High	High
High	Master Protein	Q9Z1Q9	Valine--tRNA ligase OS=Mus musculus OX=10090 GN=Vars PE=1 SV=1	32	48	140.1	3.4811e+07	3.01958e+07	High	High
High	Master Protein	Q9D8N0	Elongation factor 1-gamma OS=Mus musculus OX=10090 GN=Eef1g PE=1 SV=3	61	47	50	1.52571e+08	1.40958e+08	High	High
High	Master Protein	Q8BU30	Isoleucine--tRNA ligase, cytoplasmic OS=Mus musculus OX=10090 GN=Iars PE=1 SV=2	27	47	144.2	3.87164e+07	3.51673e+07	High	High
High	Master Protein	Q921M7	Protein FAM49B OS=Mus musculus OX=10090 GN=Fam49b PE=1 SV=1	58	47	36.8	1.08119e+08	9.44712e+07	High	High
High	Master Protein	Q9D8C9	Purine nucleoside phosphorylase OS=Mus musculus OX=10090 GN=Pnp2 PE=1 SV=1	53	47	33.9	250208	137798	Peak Found	High
High	Master Protein	P80317	T-complex protein 1 subunit zeta OS=Mus musculus OX=10090 GN=Cct6a PE=1 SV=3	42	47	58	8.50493e+07	7.8708e+07	High	High
High	Master Protein	Q6P4T2	U5 small nuclear ribonucleoprotein 200 kDa helicase OS=Mus musculus OX=10090 GN=Snrnp200 PE=1 SV=1	20	47	244.4	1.68147e+07	1.47389e+07	High	High
High	Master Protein	Q9JIF7	Coatomer subunit beta OS=Mus musculus OX=10090 GN=Copb1 PE=1 SV=1	42	46	107	3.62103e+07	3.39443e+07	High	High
High	Master Protein	E9Q3M3	Dynactin subunit 1 OS=Mus musculus OX=10090 GN=Dctn1 PE=1 SV=1	32	46	139.7	1.72428e+07	1.47243e+07	High	High
High	Master Protein	Q91YR9	Prostaglandin reductase 1 OS=Mus musculus OX=10090 GN=Ptgr1 PE=1 SV=2	71	46	35.5	1.20782e+08	1.15586e+08	High	High
High	Master Protein	Q00519	Xanthine dehydrogenase/oxidase OS=Mus musculus OX=10090 GN=Xdh PE=1 SV=5	29	46	146.5	6.51649e+07	5.9319e+07	High	High
High	Master Protein	Q9D0I9	Arginine--tRNA ligase, cytoplasmic OS=Mus musculus OX=10090 GN=Rars PE=1 SV=2	46	45	75.6	4.19645e+07	4.12834e+07	High	High
High	Master Protein	Q8R016	Bleomycin hydrolase OS=Mus musculus OX=10090 GN=Blmh PE=1 SV=1	51	45	52.5	5.99574e+07	5.45115e+07	High	High
High	Master Protein	O88958	Glucosamine-6-phosphate isomerase 1 OS=Mus musculus OX=10090 GN=Gnpda1 PE=1 SV=3	76	45	32.5	1.13226e+08	1.07821e+08	High	High
High	Master Protein	Q6GTM0	Ifit2 protein OS=Mus musculus OX=10090 GN=Ifit2 PE=1 SV=1	52	45	54.7	5.70971e+07	5.39267e+07	High	High
High	Master Protein	E9PV41	Protein diaphanous homolog 1 OS=Mus musculus OX=10090 GN=Diaph1 PE=1 SV=1	26	45	140.3	2.87366e+07	2.59096e+07	High	High
High	Master Protein	P80313	T-complex protein 1 subunit eta OS=Mus musculus OX=10090 GN=Cct7 PE=1 SV=1	42	45	59.6	6.64803e+07	5.87917e+07	High	High
High	Master Protein	O88968	Transcobalamin-2 OS=Mus musculus OX=10090 GN=Tcn2 PE=1 SV=1	66	45	47.6	1.32441e+08	1.37162e+08	High	High
High	Master Protein	Q9DBP5	UMP-CMP kinase OS=Mus musculus OX=10090 GN=Cmpk1 PE=1 SV=1	64	45	22.2	1.16552e+08	1.08399e+08	High	High
High	Master Protein	Q3TXS7	26S proteasome non-ATPase regulatory subunit 1 OS=Mus musculus OX=10090 GN=Psmd1 PE=1 SV=1	37	44	105.7	3.23469e+07	2.92791e+07	High	High
High	Master Protein	P50247	Adenosylhomocysteinase OS=Mus musculus OX=10090 GN=Ahcy PE=1 SV=3	52	44	47.7	9.81464e+07	9.95803e+07	High	High
High	Master Protein	P05201	Aspartate aminotransferase, cytoplasmic OS=Mus musculus OX=10090 GN=Got1 PE=1 SV=3	65	44	46.2	1.12947e+08	1.06772e+08	High	High
High	Master Protein	Q8CGC7	Bifunctional glutamate/proline--tRNA ligase OS=Mus musculus OX=10090 GN=Eprs PE=1 SV=4	27	44	170	3.01251e+07	2.88455e+07	High	High
High	Master Protein	Q8C845	EF-hand domain-containing protein D2 OS=Mus musculus OX=10090 GN=Efhd2 PE=1 SV=1	77	44	26.8	1.81978e+08	1.81176e+08	High	High
High	Master Protein	Q8R1B4	Eukaryotic translation initiation factor 3 subunit C OS=Mus musculus OX=10090 GN=Eif3c PE=1 SV=1	33	44	105.5	3.10251e+07	2.53322e+07	High	High
High	Master Protein	P10923	Osteopontin OS=Mus musculus OX=10090 GN=Spp1 PE=1 SV=1	61	44	32.4	7.31611e+07	2.09196e+08	High	High
High	Master Protein	P09103	Protein disulfide-isomerase OS=Mus musculus OX=10090 GN=P4hb PE=1 SV=2	57	44	57	3.43924e+07	3.92543e+07	High	High
High	Master Protein	Q3UQ44	Ras GTPase-activating-like protein IQGAP2 OS=Mus musculus OX=10090 GN=Iqgap2 PE=1 SV=2	21	44	180.4	2.60704e+07	2.2839e+07	High	High
High	Master Protein	Q8BGQ7	Alanine--tRNA ligase, cytoplasmic OS=Mus musculus OX=10090 GN=Aars PE=1 SV=1	32	43	106.8	3.1256e+07	2.80074e+07	High	High
High	Master Protein	Q91YI0	Argininosuccinate lyase OS=Mus musculus OX=10090 GN=Asl PE=1 SV=1	66	43	51.7	3.46574e+07	3.64046e+07	High	High
High	Master Protein	Q05816	Fatty acid-binding protein 5 OS=Mus musculus OX=10090 GN=Fabp5 PE=1 SV=3	80	43	15.1	2.70768e+08	2.81801e+08	High	High
High	Master Protein	Q80X90	Filamin-B OS=Mus musculus OX=10090 GN=Flnb PE=1 SV=3	14	43	277.7	5.1978e+06	5.77198e+06	High	High
High	Master Protein	P47791	Glutathione reductase, mitochondrial OS=Mus musculus OX=10090 GN=Gsr PE=1 SV=3	62	43	53.6	7.76775e+07	7.44286e+07	High	High
High	Master Protein	Q8CI94	Glycogen phosphorylase, brain form OS=Mus musculus OX=10090 GN=Pygb PE=1 SV=3	33	43	96.7	2.66285e+07	2.10603e+07	High	High
High	Master Protein	E9PV48	Interferon-induced protein with tetratricopeptide repeats 3B OS=Mus musculus OX=10090 GN=Ifit3b PE=1 SV=1	52	43	47.2	552767	732482	High	High
High	Master Protein	Q9D0F9	Phosphoglucomutase-1 OS=Mus musculus OX=10090 GN=Pgm1 PE=1 SV=4	55	43	61.4	3.88588e+07	3.55165e+07	High	High
High	Master Protein	Q8R1F1	Protein Niban 2 OS=Mus musculus OX=10090 GN=Niban2 PE=1 SV=2	40	43	84.8	6.34948e+07	56643013	High	High
High	Master Protein	Q8BG32	26S proteasome non-ATPase regulatory subunit 11 OS=Mus musculus OX=10090 GN=Psmd11 PE=1 SV=3	56	42	47.4	6.68404e+07	6.28301e+07	High	High
High	Master Protein	Q9CWJ9	Bifunctional purine biosynthesis protein PURH OS=Mus musculus OX=10090 GN=Atic PE=1 SV=2	51	42	64.2	5.11969e+07	4.47434e+07	High	High
High	Master Protein	P14211	Calreticulin OS=Mus musculus OX=10090 GN=Calr PE=1 SV=1	59	42	48	4.15361e+07	4.01332e+07	High	High
High	Master Protein	Q9D2V7	Coronin-7 OS=Mus musculus OX=10090 GN=Coro7 PE=1 SV=2	49	42	100.7	3.35631e+07	2.64605e+07	High	High
High	Master Protein	Q3U0V1	Far upstream element-binding protein 2 OS=Mus musculus OX=10090 GN=Khsrp PE=1 SV=2	37	42	76.7	3.83681e+07	3.17063e+07	High	High
High	Master Protein	Q9CPX4	Ferritin OS=Mus musculus OX=10090 GN=Ftl1 PE=1 SV=1	87	42	20.8	2.04169e+08	2.00539e+08	High	High
High	Master Protein	F6RPJ9	Insulin-degrading enzyme (Fragment) OS=Mus musculus OX=10090 GN=Ide PE=1 SV=1	37	42	114.2	3.05656e+07	3.13517e+07	High	High
High	Master Protein	Q9R1P4	Proteasome subunit alpha type-1 OS=Mus musculus OX=10090 GN=Psma1 PE=1 SV=1	60	42	29.5	1.35112e+08	1.3401e+08	High	High
High	Master Protein	Q11011	Puromycin-sensitive aminopeptidase OS=Mus musculus OX=10090 GN=Npepps PE=1 SV=2	38	42	103.3	3.62054e+07	3.11682e+07	High	High
High	Master Protein	P82198	Transforming growth factor-beta-induced protein ig-h3 OS=Mus musculus OX=10090 GN=Tgfbi PE=1 SV=1	49	42	74.6	5.19037e+07	5.9469e+07	High	High
High	Master Protein	G5E8R2	Tropomyosin alpha-1 chain OS=Mus musculus OX=10090 GN=Tpm1 PE=1 SV=1	62	42	28.7	1.1055e+07	9.72802e+06	High	High
High	Master Protein	Q9JMA1	Ubiquitin carboxyl-terminal hydrolase 14 OS=Mus musculus OX=10090 GN=Usp14 PE=1 SV=3	50	42	56	4.51254e+07	4.31252e+07	High	High
High	Master Protein	Q3TW96	UDP-N-acetylhexosamine pyrophosphorylase-like protein 1 OS=Mus musculus OX=10090 GN=Uap1l1 PE=1 SV=1	39	42	56.6	1.23272e+08	1.04549e+08	High	High
High	Master Protein	Q6PGL7	WASH complex subunit 2 OS=Mus musculus OX=10090 GN=Washc2 PE=1 SV=1	33	42	145.2	1.27425e+07	1.17417e+07	High	High
High	Master Protein	P14685	26S proteasome non-ATPase regulatory subunit 3 OS=Mus musculus OX=10090 GN=Psmd3 PE=1 SV=3	54	41	60.7	4.92287e+07	4.06099e+07	High	High
High	Master Protein	P62908	40S ribosomal protein S3 OS=Mus musculus OX=10090 GN=Rps3 PE=1 SV=1	65	41	26.7	6.04775e+07	5.60318e+07	High	High
High	Master Protein	O08529	Calpain-2 catalytic subunit OS=Mus musculus OX=10090 GN=Capn2 PE=1 SV=4	39	41	79.8	2.87617e+07	2.73791e+07	High	High
High	Master Protein	Q3U1J4	DNA damage-binding protein 1 OS=Mus musculus OX=10090 GN=Ddb1 PE=1 SV=2	23	41	126.8	2.35407e+07	2.17776e+07	High	High
High	Master Protein	Q9ERK4	Exportin-2 OS=Mus musculus OX=10090 GN=Cse1l PE=1 SV=1	35	41	110.4	3.13633e+07	2.82029e+07	High	High
High	Master Protein	Q6GSS7	Histone H2A type 2-A OS=Mus musculus OX=10090 GN=Hist2h2aa1 PE=1 SV=3	68	41	14.1	3.71456e+07	2.98688e+07	High	High
High	Master Protein	G5E8F1	Integrin alpha-M OS=Mus musculus OX=10090 GN=Itgam PE=1 SV=2	30	41	127.5	2.56855e+07	2.918e+07	High	High
High	Master Protein	B8JJN0	Predicted gene 20547 OS=Mus musculus OX=10090 GN=Gm20547 PE=3 SV=1	18	41	142.2	4.46923e+07	4.45564e+07	High	High
High	Master Protein	O35286	Pre-mRNA-splicing factor ATP-dependent RNA helicase DHX15 OS=Mus musculus OX=10090 GN=Dhx15 PE=1 SV=2	39	41	90.9	2.82302e+07	2.47792e+07	High	High
High	Master Protein	Q4FE56	Probable ubiquitin carboxyl-terminal hydrolase FAF-X OS=Mus musculus OX=10090 GN=Usp9x PE=1 SV=1	11	41	290	1.55598e+07	1.28191e+07	High	High
High	Master Protein	P97371	Proteasome activator complex subunit 1 OS=Mus musculus OX=10090 GN=Psme1 PE=1 SV=2	66	41	28.7	1.52929e+08	1.34117e+08	High	High
High	Master Protein	G3X8Q5	Ceruloplasmin OS=Mus musculus OX=10090 GN=Cp PE=1 SV=1	31	40	124.1	1.48636e+07	1.82523e+07	High	High
High	Master Protein	Q9WUM4	Coronin-1C OS=Mus musculus OX=10090 GN=Coro1c PE=1 SV=2	40	40	53.1	1.02152e+08	9.6693e+07	High	High
High	Master Protein	Q3U7R1	Extended synaptotagmin-1 OS=Mus musculus OX=10090 GN=Esyt1 PE=1 SV=2	30	40	121.5	4.06511e+07	3.99239e+07	High	High
High	Master Protein	Q61768	Kinesin-1 heavy chain OS=Mus musculus OX=10090 GN=Kif5b PE=1 SV=3	28	40	109.5	1.44276e+07	1.37344e+07	High	High
High	Master Protein	Q7TSV4	Phosphoglucomutase-2 OS=Mus musculus OX=10090 GN=Pgm2 PE=1 SV=1	40	40	68.7	3.23963e+07	2.6872e+07	High	High
High	Master Protein	Q76MZ3	Serine/threonine-protein phosphatase 2A 65 kDa regulatory subunit A alpha isoform OS=Mus musculus OX=10090 GN=Ppp2r1a PE=1 SV=3	44	40	65.3	5.67836e+07	4.38383e+07	High	High
High	Master Protein	P63028	Translationally-controlled tumor protein OS=Mus musculus OX=10090 GN=Tpt1 PE=1 SV=1	88	40	19.5	1.63136e+08	1.45604e+08	High	High
High	Master Protein	Q922F4	Tubulin beta-6 chain OS=Mus musculus OX=10090 GN=Tubb6 PE=1 SV=1	49	40	50.1	8.34811e+06	7.17603e+06	High	High
High	Master Protein	Q9D8W5	26S proteasome non-ATPase regulatory subunit 12 OS=Mus musculus OX=10090 GN=Psmd12 PE=1 SV=4	57	39	52.9	3.98162e+07	3.65322e+07	High	High
High	Master Protein	Q99JI4	26S proteasome non-ATPase regulatory subunit 6 OS=Mus musculus OX=10090 GN=Psmd6 PE=1 SV=1	57	39	45.5	3.53106e+07	3.19835e+07	High	High
High	Master Protein	E9PZD8	Ceruloplasmin OS=Mus musculus OX=10090 GN=Cp PE=1 SV=1	31	39	124.1	146502	186874	Peak Found	High
High	Master Protein	Q05D44	Eukaryotic translation initiation factor 5B OS=Mus musculus OX=10090 GN=Eif5b PE=1 SV=2	32	39	137.5	1.48726e+07	1.57268e+07	High	High
High	Master Protein	Q8BML9	Glutamine--tRNA ligase OS=Mus musculus OX=10090 GN=Qars PE=1 SV=1	39	39	87.6	3.30411e+07	2.70418e+07	High	High
High	Master Protein	Q9CY58	Plasminogen activator inhibitor 1 RNA-binding protein OS=Mus musculus OX=10090 GN=Serbp1 PE=1 SV=2	36	39	44.7	2.76703e+07	2.60389e+07	High	High
High	Master Protein	P60335	Poly(rC)-binding protein 1 OS=Mus musculus OX=10090 GN=Pcbp1 PE=1 SV=1	57	39	37.5	4.92292e+07	5.11903e+07	High	High
High	Master Protein	Q5XJF6	Ribosomal protein OS=Mus musculus OX=10090 GN=Rpl10a PE=1 SV=1	65	39	24.8	7.87558e+07	8.82692e+07	High	High
High	Master Protein	Q921M3	Splicing factor 3B subunit 3 OS=Mus musculus OX=10090 GN=Sf3b3 PE=1 SV=1	25	39	135.5	2.54104e+07	2.43671e+07	High	High
High	Master Protein	P51125	Calpastatin OS=Mus musculus OX=10090 GN=Cast PE=1 SV=2	35	38	84.9	8.82619e+06	1.15368e+07	High	High
High	Master Protein	O89053	Coronin-1A OS=Mus musculus OX=10090 GN=Coro1a PE=1 SV=5	47	38	51	2.47468e+08	2.4066e+08	High	High
High	Master Protein	Q8QZY1	Eukaryotic translation initiation factor 3 subunit L OS=Mus musculus OX=10090 GN=Eif3l PE=1 SV=1	42	38	66.6	4.03376e+07	3.57269e+07	High	High
High	Master Protein	Q99020	Heterogeneous nuclear ribonucleoprotein A/B OS=Mus musculus OX=10090 GN=Hnrnpab PE=1 SV=1	47	38	30.8	1.00928e+08	9.46563e+07	High	High
High	Master Protein	Q8BG05	Heterogeneous nuclear ribonucleoprotein A3 OS=Mus musculus OX=10090 GN=Hnrnpa3 PE=1 SV=1	42	38	39.6	1.01792e+08	1.00006e+08	High	High
High	Master Protein	Q8CGP5	Histone H2A type 1-F OS=Mus musculus OX=10090 GN=Hist1h2af PE=1 SV=3	70	38	14.2	1.42875e+09	1.24202e+09	High	High
High	Master Protein	P0DOV1	Interferon-activable protein 205-B OS=Mus musculus OX=10090 GN=Mnda PE=1 SV=1	64	38	46.9	2.01194e+07	1.86168e+07	High	High
High	Master Protein	E9Q3I4	Intersectin-1 OS=Mus musculus OX=10090 GN=Itsn1 PE=1 SV=1	28	38	133.1	1.37412e+07	1.08984e+07	High	High
High	Master Protein	P14152	Malate dehydrogenase, cytoplasmic OS=Mus musculus OX=10090 GN=Mdh1 PE=1 SV=3	55	38	36.5	1.39982e+08	1.31372e+08	High	High
High	Master Protein	P50580	Proliferation-associated protein 2G4 OS=Mus musculus OX=10090 GN=Pa2g4 PE=1 SV=3	58	38	43.7	6.96457e+07	7.28155e+07	High	High
High	Master Protein	Q810B6	Rabankyrin-5 OS=Mus musculus OX=10090 GN=Ankfy1 PE=1 SV=2	32	38	128.6	2.99188e+07	2.31085e+07	High	High
High	Master Protein	P80315	T-complex protein 1 subunit delta OS=Mus musculus OX=10090 GN=Cct4 PE=1 SV=3	52	38	58	6.63604e+07	6.71497e+07	High	High
High	Master Protein	P08113	Endoplasmin OS=Mus musculus OX=10090 GN=Hsp90b1 PE=1 SV=2	35	37	92.4	2.20032e+07	1.96688e+07	High	High
High	Master Protein	Q8BPU7	Engulfment and cell motility protein 1 OS=Mus musculus OX=10090 GN=Elmo1 PE=1 SV=2	44	37	83.9	2.54527e+07	2.19204e+07	High	High
High	Master Protein	Q8BWY3	Eukaryotic peptide chain release factor subunit 1 OS=Mus musculus OX=10090 GN=Etf1 PE=1 SV=4	50	37	49	3.84895e+07	3.884e+07	High	High
High	Master Protein	G5E924	Heterogeneous nuclear ribonucleoprotein L (Fragment) OS=Mus musculus OX=10090 GN=Hnrnpl PE=1 SV=1	40	37	66.9	2.88224e+07	2.07705e+07	High	High
High	Master Protein	P08071	Lactotransferrin OS=Mus musculus OX=10090 GN=Ltf PE=1 SV=4	35	37	77.8	2.53137e+07	2.45926e+07	High	High
High	Master Protein	O89017	Legumain OS=Mus musculus OX=10090 GN=Lgmn PE=1 SV=1	45	37	49.3	1.02146e+08	1.22108e+08	High	High
High	Master Protein	P11152	Lipoprotein lipase OS=Mus musculus OX=10090 GN=Lpl PE=1 SV=3	42	37	53.1	1.91638e+08	1.8951e+08	High	High
High	Master Protein	Q7M739	Nuclear pore complex-associated intranuclear coiled-coil protein TPR OS=Mus musculus OX=10090 GN=Tpr PE=1 SV=1	16	37	266.8	1.71299e+07	7.70942e+06	High	High
High	Master Protein	Q9D662	Protein transport protein Sec23B OS=Mus musculus OX=10090 GN=Sec23b PE=1 SV=1	41	37	86.4	2.83666e+07	2.70489e+07	High	High
High	Master Protein	P17751	Triosephosphate isomerase OS=Mus musculus OX=10090 GN=Tpi1 PE=1 SV=4	61	37	32.2	1.51381e+08	1.3142e+08	High	High
High	Master Protein	P84091	AP-2 complex subunit mu OS=Mus musculus OX=10090 GN=Ap2m1 PE=1 SV=1	53	36	49.6	5.91582e+07	5.03932e+07	High	High
High	Master Protein	Q60631	Growth factor receptor-bound protein 2 OS=Mus musculus OX=10090 GN=Grb2 PE=1 SV=1	78	36	25.2	8.12304e+07	7.32087e+07	High	High
High	Master Protein	P00493	Hypoxanthine-guanine phosphoribosyltransferase OS=Mus musculus OX=10090 GN=Hprt1 PE=1 SV=3	70	36	24.6	1.49891e+08	1.54035e+08	High	High
High	Master Protein	B1ARU4	Microtubule-actin cross-linking factor 1 OS=Mus musculus OX=10090 GN=Macf1 PE=1 SV=1	5	36	831.1	5.52069e+06	4.82181e+06	High	High
High	Master Protein	J3QPW1	Phosphatidylinositol transfer protein alpha isoform OS=Mus musculus OX=10090 GN=Pitpna PE=1 SV=1	68	36	32	7.46221e+07	7.37828e+07	High	High
High	Master Protein	Q9Z0P5	Twinfilin-2 OS=Mus musculus OX=10090 GN=Twf2 PE=1 SV=1	67	36	39.4	4.94338e+07	4.47103e+07	High	High
High	Master Protein	P62196	26S proteasome regulatory subunit 8 OS=Mus musculus OX=10090 GN=Psmc5 PE=1 SV=1	48	35	45.6	3.05603e+07	21415067	High	High
High	Master Protein	O88325	Alpha-N-acetylglucosaminidase OS=Mus musculus OX=10090 GN=Naglu PE=1 SV=1	36	35	82.5	1.8288e+07	1.60956e+07	High	High
High	Master Protein	A0A498WGK2	Asparaginyl-tRNA synthetase OS=Mus musculus OX=10090 GN=Nars PE=4 SV=1	29	35	64.2	3.33766e+07	3.0312e+07	High	High
High	Master Protein	Q922B2	Aspartate--tRNA ligase, cytoplasmic OS=Mus musculus OX=10090 GN=Dars PE=1 SV=2	53	35	57.1	3.40184e+07	2.93171e+07	High	High
High	Master Protein	Q9ER72	Cysteine--tRNA ligase, cytoplasmic OS=Mus musculus OX=10090 GN=Cars PE=1 SV=2	39	35	94.8	2.08987e+07	2.0855e+07	High	High
High	Master Protein	Q8BGD9	Eukaryotic translation initiation factor 4B OS=Mus musculus OX=10090 GN=Eif4b PE=1 SV=1	37	35	68.8	2.15735e+07	2.39821e+07	High	High
High	Master Protein	Q61937	Nucleophosmin OS=Mus musculus OX=10090 GN=Npm1 PE=1 SV=1	57	35	32.5	8.6624e+07	8.50782e+07	High	High
High	Master Protein	Q5SUR0	Phosphoribosylformylglycinamidine synthase OS=Mus musculus OX=10090 GN=Pfas PE=1 SV=1	27	35	144.5	1.94785e+07	1.86201e+07	High	High
High	Master Protein	Q3UPL0	Protein transport protein Sec31A OS=Mus musculus OX=10090 GN=Sec31a PE=1 SV=2	21	35	133.5	1.67671e+07	1.43335e+07	High	High
High	Master Protein	Q3TBD2	Rho GTPase-activating protein 45 OS=Mus musculus OX=10090 GN=Arhgap45 PE=1 SV=2	24	35	122.8	1.05777e+07	9.32512e+06	High	High
High	Master Protein	P40336	Vacuolar protein sorting-associated protein 26A OS=Mus musculus OX=10090 GN=Vps26a PE=1 SV=1	69	35	38.1	5.90867e+07	5.55293e+07	High	High
High	Master Protein	O54774	AP-3 complex subunit delta-1 OS=Mus musculus OX=10090 GN=Ap3d1 PE=1 SV=1	25	34	135	1.62642e+07	1.39819e+07	High	High
High	Master Protein	E9QNN1	ATP-dependent RNA helicase A OS=Mus musculus OX=10090 GN=Dhx9 PE=1 SV=1	21	34	149.6	1.54968e+07	1.54977e+07	High	High
High	Master Protein	Q6P1B9	Bin1 protein OS=Mus musculus OX=10090 GN=Bin1 PE=1 SV=1	51	34	52.7	3.49098e+07	3.48159e+07	High	High
High	Master Protein	Q920E5	Farnesyl pyrophosphate synthase OS=Mus musculus OX=10090 GN=Fdps PE=1 SV=1	61	34	40.6	8.10917e+07	7.84688e+07	High	High
High	Master Protein	Q9CZD3	Glycine--tRNA ligase OS=Mus musculus OX=10090 GN=Gars1 PE=1 SV=1	33	34	81.8	3.6474e+07	3.26371e+07	High	High
High	Master Protein	P51859	Hepatoma-derived growth factor OS=Mus musculus OX=10090 GN=Hdgf PE=1 SV=2	66	34	26.3	3.30298e+07	3.44573e+07	High	High
High	Master Protein	P17897	Lysozyme C-1 OS=Mus musculus OX=10090 GN=Lyz1 PE=1 SV=1	37	34	16.8	4.60245e+06	4.28844e+06	High	High
High	Master Protein	O70145	Neutrophil cytosol factor 2 OS=Mus musculus OX=10090 GN=Ncf2 PE=1 SV=1	45	34	59.4	2.92295e+07	2.80275e+07	High	High
High	Master Protein	E9Q5F6	Polyubiquitin-C (Fragment) OS=Mus musculus OX=10090 GN=Ubc PE=1 SV=1	61	34	22.6	3.17812e+08	2.88429e+08	High	High
High	Master Protein	Q9Z2U0	Proteasome subunit alpha type-7 OS=Mus musculus OX=10090 GN=Psma7 PE=1 SV=1	62	34	27.8	1.35004e+08	1.33542e+08	High	High
High	Master Protein	E9QAJ9	Rho GTPase-activating protein 17 OS=Mus musculus OX=10090 GN=Arhgap17 PE=1 SV=1	36	34	88.9	2.52585e+07	2.27191e+07	High	High
High	Master Protein	Q8CIN4	Serine/threonine-protein kinase PAK 2 OS=Mus musculus OX=10090 GN=Pak2 PE=1 SV=1	56	34	57.9	2.7452e+07	2.32383e+07	High	High
High	Master Protein	Q9Z1N5	Spliceosome RNA helicase Ddx39b OS=Mus musculus OX=10090 GN=Ddx39b PE=1 SV=1	44	34	49	1.87653e+08	1.59827e+08	High	High
High	Master Protein	P08228	Superoxide dismutase [Cu-Zn] OS=Mus musculus OX=10090 GN=Sod1 PE=1 SV=2	89	34	15.9	1.94859e+08	1.63053e+08	High	High
High	Master Protein	Q9Z1G3	V-type proton ATPase subunit C 1 OS=Mus musculus OX=10090 GN=Atp6v1c1 PE=1 SV=4	53	34	43.9	3.67276e+07	3.22711e+07	High	High
High	Master Protein	Q9WVJ2	26S proteasome non-ATPase regulatory subunit 13 OS=Mus musculus OX=10090 GN=Psmd13 PE=1 SV=1	62	33	42.8	4.30385e+07	4.08454e+07	High	High
High	Master Protein	P70290	55 kDa erythrocyte membrane protein OS=Mus musculus OX=10090 GN=Mpp1 PE=1 SV=1	54	33	52.2	3.10406e+07	2.38676e+07	High	High
High	Master Protein	Q6Q899	Antiviral innate immune response receptor RIG-I OS=Mus musculus OX=10090 GN=Ddx58 PE=1 SV=2	28	33	105.9	3.5266e+07	3.20027e+07	High	High
High	Master Protein	A0A087WQS2	Basic leucine zipper and W2 domain-containing protein 1 OS=Mus musculus OX=10090 GN=Bzw1 PE=1 SV=1	39	33	51.2	2.39756e+07	2.25699e+07	High	High
High	Master Protein	Q9QZE5	Coatomer subunit gamma-1 OS=Mus musculus OX=10090 GN=Copg1 PE=1 SV=1	30	33	97.5	2.7702e+07	2.46567e+07	High	High
High	Master Protein	Q8BJW6	Eukaryotic translation initiation factor 2A OS=Mus musculus OX=10090 GN=Eif2a PE=1 SV=2	46	33	64.4	2.21658e+07	2.15939e+07	High	High
High	Master Protein	E9Q9E1	Eukaryotic translation initiation factor 4 gamma 1 OS=Mus musculus OX=10090 GN=Eif4g1 PE=1 SV=1	18	33	175.2	2.37623e+07	2.48191e+07	High	High
High	Master Protein	P63242	Eukaryotic translation initiation factor 5A-1 OS=Mus musculus OX=10090 GN=Eif5a PE=1 SV=2	72	33	16.8	1.44404e+08	1.42365e+08	High	High
High	Master Protein	P97494	Glutamate--cysteine ligase catalytic subunit OS=Mus musculus OX=10090 GN=Gclc PE=1 SV=4	44	33	72.5	1.91289e+07	1.89859e+07	High	High
High	Master Protein	P15864	Histone H1.2 OS=Mus musculus OX=10090 GN=H1-2 PE=1 SV=2	42	33	21.3	1.31462e+07	1.30319e+07	High	High
High	Master Protein	P43277	Histone H1.3 OS=Mus musculus OX=10090 GN=H1-3 PE=1 SV=2	36	33	22.1	2.06657e+08	1.66835e+08	High	High
High	Master Protein	A2A6H0	LIM and SH3 domain protein 1 (Fragment) OS=Mus musculus OX=10090 GN=Lasp1 PE=1 SV=1	49	33	21.3	4.56222e+07	4.51569e+07	High	High
High	Master Protein	P08249	Malate dehydrogenase, mitochondrial OS=Mus musculus OX=10090 GN=Mdh2 PE=1 SV=3	56	33	35.6	6.04277e+07	5.69264e+07	High	High
High	Master Protein	P17563	Methanethiol oxidase OS=Mus musculus OX=10090 GN=Selenbp1 PE=1 SV=2	51	33	52.5	2.64002e+07	2.50323e+07	High	High
High	Master Protein	Q99K48	Non-POU domain-containing octamer-binding protein OS=Mus musculus OX=10090 GN=Nono PE=1 SV=3	32	33	54.5	2.61034e+07	2.22577e+07	High	High
High	Master Protein	Q99PV0	Pre-mRNA-processing-splicing factor 8 OS=Mus musculus OX=10090 GN=Prpf8 PE=1 SV=2	11	33	273.4	1.03708e+07	8.22485e+06	High	High
High	Master Protein	Q91VI7	Ribonuclease inhibitor OS=Mus musculus OX=10090 GN=Rnh1 PE=1 SV=1	53	33	49.8	9.95403e+07	9.30985e+07	High	High
High	Master Protein	Q9Z1F9	SUMO-activating enzyme subunit 2 OS=Mus musculus OX=10090 GN=Uba2 PE=1 SV=1	46	33	70.5	1.60072e+07	1.76659e+07	High	High
High	Master Protein	Q9JLJ2	4-trimethylaminobutyraldehyde dehydrogenase OS=Mus musculus OX=10090 GN=Aldh9a1 PE=1 SV=1	41	32	53.5	4.62763e+07	3.69254e+07	High	High
High	Master Protein	O35841	Apoptosis inhibitor 5 OS=Mus musculus OX=10090 GN=Api5 PE=1 SV=2	40	32	56.8	2.7045e+07	2.68858e+07	High	High
High	Master Protein	O35744	Chitinase-like protein 3 OS=Mus musculus OX=10090 GN=Chil3 PE=1 SV=2	45	32	44.4	6.99079e+07	5.78444e+07	High	High
High	Master Protein	F8WI14	Extracellular matrix protein 1 OS=Mus musculus OX=10090 GN=Ecm1 PE=1 SV=1	39	32	62.7	3.53973e+07	4.29821e+07	High	High
High	Master Protein	Q5RKN9	F-actin-capping protein subunit alpha OS=Mus musculus OX=10090 GN=Capza1 PE=1 SV=1	64	32	32.9	91435992	7.76438e+07	High	High
High	Master Protein	P01899	H-2 class I histocompatibility antigen, D-B alpha chain OS=Mus musculus OX=10090 GN=H2-D1 PE=1 SV=2	37	32	40.8	5.58558e+07	5.57116e+07	High	High
High	Master Protein	P27661	Histone H2AX OS=Mus musculus OX=10090 GN=H2afx PE=1 SV=2	70	32	15.1	2.01793e+07	1.72717e+07	High	High
High	Master Protein	Q8BMJ2	Leucine--tRNA ligase, cytoplasmic OS=Mus musculus OX=10090 GN=Lars PE=1 SV=2	20	32	134.1	1.19296e+07	1.07867e+07	High	High
High	Master Protein	P47811	Mitogen-activated protein kinase 14 OS=Mus musculus OX=10090 GN=Mapk14 PE=1 SV=3	53	32	41.3	6.18289e+07	59236610	High	High
High	Master Protein	P51660	Peroxisomal multifunctional enzyme type 2 OS=Mus musculus OX=10090 GN=Hsd17b4 PE=1 SV=3	32	32	79.4	3.29408e+07	2.84289e+07	High	High
High	Master Protein	Q99K85	Phosphoserine aminotransferase OS=Mus musculus OX=10090 GN=Psat1 PE=1 SV=1	46	32	40.4	9.68213e+07	9.24582e+07	High	High
High	Master Protein	Q8BV49	Pyrin and HIN domain-containing protein 1 OS=Mus musculus OX=10090 GN=Pyhin1 PE=1 SV=1	53	32	46.9	1.94333e+07	1.84768e+07	High	High
High	Master Protein	Q8C1B7	Septin-11 OS=Mus musculus OX=10090 GN=Septin11 PE=1 SV=4	48	32	49.7	4.34774e+07	3.80078e+07	High	High
High	Master Protein	Q3UID0	SWI/SNF complex subunit SMARCC2 OS=Mus musculus OX=10090 GN=Smarcc2 PE=1 SV=1	30	32	124.6	9.67591e+06	1.17657e+07	High	High
High	Master Protein	Q91YR1	Twinfilin-1 OS=Mus musculus OX=10090 GN=Twf1 PE=1 SV=2	59	32	40.1	6.38572e+07	6.68577e+07	High	High
High	Master Protein	Q8BVQ9	26S proteasome regulatory subunit 7 OS=Mus musculus OX=10090 GN=Psmc2 PE=1 SV=1	42	31	52.8	2.98754e+07	2.54404e+07	High	High
High	Master Protein	Q8BK64	Activator of 90 kDa heat shock protein ATPase homolog 1 OS=Mus musculus OX=10090 GN=Ahsa1 PE=1 SV=2	57	31	38.1	4.68703e+07	4.22136e+07	High	High
High	Master Protein	Q8CBB7	AP-1 complex subunit gamma OS=Mus musculus OX=10090 GN=Ap1g1 PE=1 SV=1	29	31	91.7	2.67718e+07	2.30961e+07	High	High
High	Master Protein	A0A0R4J2B2	BTB/POZ domain-containing protein KCTD12 OS=Mus musculus OX=10090 GN=Kctd12 PE=1 SV=1	41	31	35.9	8.37041e+07	7.58143e+07	High	High
High	Master Protein	P42567	Epidermal growth factor receptor substrate 15 OS=Mus musculus OX=10090 GN=Eps15 PE=1 SV=1	32	31	98.4	3.38352e+07	3.22581e+07	High	High
High	Master Protein	Q9Z0N1	Eukaryotic translation initiation factor 2 subunit 3, X-linked OS=Mus musculus OX=10090 GN=Eif2s3x PE=1 SV=2	50	31	51	4.94001e+07	4.52856e+07	High	High
High	Master Protein	Q60668	Heterogeneous nuclear ribonucleoprotein D0 OS=Mus musculus OX=10090 GN=Hnrnpd PE=1 SV=2	38	31	38.3	6.89872e+07	6.21768e+07	High	High
High	Master Protein	Q8VEK3	Heterogeneous nuclear ribonucleoprotein U OS=Mus musculus OX=10090 GN=Hnrnpu PE=1 SV=1	24	31	87.9	3.44741e+07	3.09914e+07	High	High
High	Master Protein	Q922I7	Polypyrimidine tract-binding protein 1 OS=Mus musculus OX=10090 GN=Ptbp1 PE=1 SV=1	43	31	59.3	6.93632e+07	6.05537e+07	High	High
High	Master Protein	Q9QUM9	Proteasome subunit alpha type-6 OS=Mus musculus OX=10090 GN=Psma6 PE=1 SV=1	43	31	27.4	1.131e+08	1.05237e+08	High	High
High	Master Protein	P50396	Rab GDP dissociation inhibitor alpha OS=Mus musculus OX=10090 GN=Gdi1 PE=1 SV=3	49	31	50.5	9.14728e+06	7.80656e+06	High	High
High	Master Protein	Q6P8X1	Sorting nexin-6 OS=Mus musculus OX=10090 GN=Snx6 PE=1 SV=2	43	31	46.6	1.67937e+07	1.44417e+07	High	High
High	Master Protein	P70315	Wiskott-Aldrich syndrome protein homolog OS=Mus musculus OX=10090 GN=Was PE=1 SV=1	43	31	54.2	2.6787e+07	2.25335e+07	High	High
High	Master Protein	P62960	Y-box-binding protein 1 OS=Mus musculus OX=10090 GN=Ybx1 PE=1 SV=3	66	31	35.7	3.20492e+07	3.1145e+07	High	High
High	Master Protein	Q80UE5	Band 4.1-like protein 2 OS=Mus musculus OX=10090 GN=Epb41l2 PE=1 SV=1	27	30	101.8	6.97156e+06	6.78619e+06	High	High
High	Master Protein	P06797	Cathepsin L1 OS=Mus musculus OX=10090 GN=Ctsl PE=1 SV=2	41	30	37.5	8.95028e+07	1.19635e+08	High	High
High	Master Protein	O55029	Coatomer subunit beta' OS=Mus musculus OX=10090 GN=Copb2 PE=1 SV=2	24	30	102.4	2.45225e+07	2.52883e+07	High	High
High	Master Protein	P28271	Cytoplasmic aconitate hydratase OS=Mus musculus OX=10090 GN=Aco1 PE=1 SV=3	27	30	98.1	4.23243e+07	3.50473e+07	High	High
High	Master Protein	P22682	E3 ubiquitin-protein ligase CBL OS=Mus musculus OX=10090 GN=Cbl PE=1 SV=3	30	30	100.5	2.18833e+07	1.62956e+07	High	High
High	Master Protein	P47754	F-actin-capping protein subunit alpha-2 OS=Mus musculus OX=10090 GN=Capza2 PE=1 SV=3	68	30	32.9	5.94764e+07	5.76781e+07	High	High
High	Master Protein	Q61035	Histidine--tRNA ligase, cytoplasmic OS=Mus musculus OX=10090 GN=Hars PE=1 SV=2	40	30	57.4	4.58451e+07	4.58729e+07	High	High
High	Master Protein	O70435	Proteasome subunit alpha type-3 OS=Mus musculus OX=10090 GN=Psma3 PE=1 SV=3	45	30	28.4	8.11238e+07	8.50271e+07	High	High
High	Master Protein	P27005	Protein S100-A8 OS=Mus musculus OX=10090 GN=S100a8 PE=1 SV=3	94	30	10.3	6.458e+07	7.44562e+07	High	High
High	Master Protein	Q5FWK3	Rho GTPase-activating protein 1 OS=Mus musculus OX=10090 GN=Arhgap1 PE=1 SV=1	57	30	50.4	2.91784e+07	2.84312e+07	High	High
High	Master Protein	Q6NZD2	Sorting nexin 1 OS=Mus musculus OX=10090 GN=Snx1 PE=1 SV=1	37	30	58.8	2.29765e+07	1.99754e+07	High	High
High	Master Protein	Q8VDJ3	Vigilin OS=Mus musculus OX=10090 GN=Hdlbp PE=1 SV=1	23	30	141.7	1.19076e+07	9.90482e+06	High	High
High	Master Protein	P14206	40S ribosomal protein SA OS=Mus musculus OX=10090 GN=Rpsa PE=1 SV=4	63	29	32.8	7.27243e+07	6.431e+07	High	High
High	Master Protein	P54822	Adenylosuccinate lyase OS=Mus musculus OX=10090 GN=Adsl PE=1 SV=2	46	29	54.8	2.05953e+07	2.0117e+07	High	High
High	Master Protein	P27046	Alpha-mannosidase 2 OS=Mus musculus OX=10090 GN=Man2a1 PE=1 SV=2	25	29	131.5	1.25317e+07	1.26757e+07	High	High
High	Master Protein	Q8VDW0	ATP-dependent RNA helicase DDX39A OS=Mus musculus OX=10090 GN=Ddx39a PE=1 SV=1	43	29	49	9.77137e+06	8.90149e+06	High	High
High	Master Protein	Q06138	Calcium-binding protein 39 OS=Mus musculus OX=10090 GN=Cab39 PE=1 SV=2	56	29	39.8	3.75329e+07	3.44384e+07	High	High
High	Master Protein	G3X8T3	Carboxypeptidase OS=Mus musculus OX=10090 GN=Ctsa PE=1 SV=1	27	29	55.7	4.72711e+07	5.35131e+07	High	High
High	Master Protein	Q99KJ8	Dynactin subunit 2 OS=Mus musculus OX=10090 GN=Dctn2 PE=1 SV=3	56	29	44.1	3.13507e+07	2.62818e+07	High	High
High	Master Protein	Q8R050	Eukaryotic peptide chain release factor GTP-binding subunit ERF3A OS=Mus musculus OX=10090 GN=Gspt1 PE=1 SV=2	34	29	68.6	1.8707e+07	1.72151e+07	High	High
High	Master Protein	P97807	Fumarate hydratase, mitochondrial OS=Mus musculus OX=10090 GN=Fh PE=1 SV=3	43	29	54.3	2.8442e+07	2.75476e+07	High	High
High	Master Protein	Q9CPV4	Glyoxalase domain-containing protein 4 OS=Mus musculus OX=10090 GN=Glod4 PE=1 SV=1	68	29	33.3	3.55987e+07	3.48459e+07	High	High
High	Master Protein	Q9Z2X1	Heterogeneous nuclear ribonucleoprotein F OS=Mus musculus OX=10090 GN=Hnrnpf PE=1 SV=3	47	29	45.7	3.9551e+07	4.27855e+07	High	High
High	Master Protein	P34960	Macrophage metalloelastase OS=Mus musculus OX=10090 GN=Mmp12 PE=1 SV=3	40	29	54.9	2.68389e+07	2.13998e+07	High	High
High	Master Protein	P10810	Monocyte differentiation antigen CD14 OS=Mus musculus OX=10090 GN=Cd14 PE=1 SV=1	52	29	39.2	8.73128e+07	9.46696e+07	High	High
High	Master Protein	Q8BHG1	Nardilysin OS=Mus musculus OX=10090 GN=Nrdc PE=1 SV=1	21	29	132.8	1.62902e+07	1.95685e+07	High	High
High	Master Protein	Q8K1X4	Nck-associated protein 1-like OS=Mus musculus OX=10090 GN=Nckap1l PE=1 SV=1	24	29	128.8	2.32115e+07	2.14175e+07	High	High
High	Master Protein	A2AT02	NSFL1 cofactor p47 OS=Mus musculus OX=10090 GN=Nsfl1c PE=1 SV=1	57	29	37.4	80311.9	53676.8	High	High
High	Master Protein	Q9CZ44	NSFL1 cofactor p47 OS=Mus musculus OX=10090 GN=Nsfl1c PE=1 SV=1	57	29	40.7	2.60054e+07	2.40361e+07	High	High
High	Master Protein	Q61171	Peroxiredoxin-2 OS=Mus musculus OX=10090 GN=Prdx2 PE=1 SV=3	72	29	21.8	1.34226e+08	1.23734e+08	High	High
High	Master Protein	P99029	Peroxiredoxin-5, mitochondrial OS=Mus musculus OX=10090 GN=Prdx5 PE=1 SV=2	58	29	21.9	1.39515e+08	1.2161e+08	High	High
High	Master Protein	P97372	Proteasome activator complex subunit 2 OS=Mus musculus OX=10090 GN=Psme2 PE=1 SV=4	63	29	27	6.00496e+07	55966733	High	High
High	Master Protein	Q9R1P0	Proteasome subunit alpha type-4 OS=Mus musculus OX=10090 GN=Psma4 PE=1 SV=1	62	29	29.5	7.4943e+07	7.81763e+07	High	High
High	Master Protein	Q3UW53	Protein Niban 1 OS=Mus musculus OX=10090 GN=Niban1 PE=1 SV=2	20	29	102.6	1.40733e+07	1.30109e+07	High	High
High	Master Protein	A0A0G2JGD2	Protein S100-A4 (Fragment) OS=Mus musculus OX=10090 GN=S100a4 PE=1 SV=1	81	29	9.1	4.99223e+08	5.46223e+08	High	High
High	Master Protein	S4R2A9	Protein transport protein Sec31A (Fragment) OS=Mus musculus OX=10090 GN=Sec31a PE=1 SV=1	25	29	101	81064.4	60139.4	Peak Found	High
High	Master Protein	E9PUF7	Rho guanine nucleotide exchange factor 1 OS=Mus musculus OX=10090 GN=Arhgef1 PE=1 SV=1	23	29	108.6	9.45558e+06	7.47538e+06	High	High
High	Master Protein	P58389	Serine/threonine-protein phosphatase 2A activator OS=Mus musculus OX=10090 GN=Ptpa PE=1 SV=1	63	29	36.7	4.42056e+07	4.24134e+07	High	High
High	Master Protein	Q8R550	SH3 domain-containing kinase-binding protein 1 OS=Mus musculus OX=10090 GN=Sh3kbp1 PE=1 SV=1	31	29	78.1	9.4519e+06	8.15096e+06	High	High
High	Master Protein	Q8K4Z5	Splicing factor 3A subunit 1 OS=Mus musculus OX=10090 GN=Sf3a1 PE=1 SV=1	31	29	88.5	1.67859e+07	1.48967e+07	High	High
High	Master Protein	Q80X50	Ubiquitin-associated protein 2-like OS=Mus musculus OX=10090 GN=Ubap2l PE=1 SV=1	21	29	116.7	1.31964e+07	1.27831e+07	High	High
High	Master Protein	Q91ZJ5	UTP--glucose-1-phosphate uridylyltransferase OS=Mus musculus OX=10090 GN=Ugp2 PE=1 SV=3	40	29	56.9	3.45048e+07	3.77748e+07	High	High
High	Master Protein	P62192	26S proteasome regulatory subunit 4 OS=Mus musculus OX=10090 GN=Psmc1 PE=1 SV=1	55	28	49.2	2.30293e+07	2.10891e+07	High	High
High	Master Protein	O88685	26S proteasome regulatory subunit 6A OS=Mus musculus OX=10090 GN=Psmc3 PE=1 SV=2	45	28	49.5	2.45236e+07	2.14858e+07	High	High
High	Master Protein	P54775	26S proteasome regulatory subunit 6B OS=Mus musculus OX=10090 GN=Psmc4 PE=1 SV=2	52	28	47.4	24312702	2.19897e+07	High	High
High	Master Protein	P45376	Aldo-keto reductase family 1 member B1 OS=Mus musculus OX=10090 GN=Akr1b1 PE=1 SV=3	58	28	35.7	1.02676e+08	9.18637e+07	High	High
High	Master Protein	Q9Z1T1	AP-3 complex subunit beta-1 OS=Mus musculus OX=10090 GN=Ap3b1 PE=1 SV=2	18	28	122.7	1.96082e+07	1.44301e+07	High	High
High	Master Protein	Q9ERU9	E3 SUMO-protein ligase RanBP2 OS=Mus musculus OX=10090 GN=Ranbp2 PE=1 SV=2	7	28	340.9	5.69335e+06	5.78199e+06	High	High
High	Master Protein	P09528	Ferritin heavy chain OS=Mus musculus OX=10090 GN=Fth1 PE=1 SV=2	59	28	21.1	1.2388e+08	1.04721e+08	High	High
High	Master Protein	O09131	Glutathione S-transferase omega-1 OS=Mus musculus OX=10090 GN=Gsto1 PE=1 SV=2	50	28	27.5	3.73969e+07	3.35579e+07	High	High
High	Master Protein	Q9R111	Guanine deaminase OS=Mus musculus OX=10090 GN=Gda PE=1 SV=1	46	28	51	2.47282e+07	2.43581e+07	High	High
High	Master Protein	G3UVV4	Hexokinase-1 OS=Mus musculus OX=10090 GN=Hk1 PE=1 SV=1	20	28	101.8	1.76821e+07	1.36552e+07	High	High
High	Master Protein	Q61029	Lamina-associated polypeptide 2, isoforms beta/delta/epsilon/gamma OS=Mus musculus OX=10090 GN=Tmpo PE=1 SV=4	49	28	50.3	36924165	3.44242e+07	High	High
High	Master Protein	Q9DBG5	Perilipin-3 OS=Mus musculus OX=10090 GN=Plin3 PE=1 SV=1	46	28	47.2	1.88608e+07	1.73159e+07	High	High
High	Master Protein	P70296	Phosphatidylethanolamine-binding protein 1 OS=Mus musculus OX=10090 GN=Pebp1 PE=1 SV=3	80	28	20.8	9.69358e+07	9.81754e+07	High	High
High	Master Protein	A0A2I3BRL8	Predicted gene 7324 OS=Mus musculus OX=10090 GN=Gm7324 PE=4 SV=1	36	28	42.2	3.80376e+07	3.39257e+07	High	High
High	Master Protein	Q501J6	Probable ATP-dependent RNA helicase DDX17 OS=Mus musculus OX=10090 GN=Ddx17 PE=1 SV=1	30	28	72.4	2.18943e+07	1.9884e+07	High	High
High	Master Protein	O09061	Proteasome subunit beta type-1 OS=Mus musculus OX=10090 GN=Psmb1 PE=1 SV=1	64	28	26.4	8.66692e+07	9.0495e+07	High	High
High	Master Protein	E9Q1S3	Protein transport protein SEC23 OS=Mus musculus OX=10090 GN=Sec23a PE=1 SV=1	32	28	82.9	1.21818e+07	1.23785e+07	High	High
High	Master Protein	P23249	Putative helicase MOV-10 OS=Mus musculus OX=10090 GN=Mov10 PE=1 SV=2	20	28	113.5	6.16609e+06	6.29662e+06	High	High
High	Master Protein	Q8K183	Pyridoxal kinase OS=Mus musculus OX=10090 GN=Pdxk PE=1 SV=1	59	28	35	7.16815e+07	7.00122e+07	High	High
High	Master Protein	E9Q1G8	Septin 7 OS=Mus musculus OX=10090 GN=Sept7 PE=1 SV=2	37	28	50.6	1.85663e+07	1.66769e+07	High	High
High	Master Protein	Q64324	Syntaxin-binding protein 2 OS=Mus musculus OX=10090 GN=Stxbp2 PE=1 SV=1	43	28	66.3	1.62682e+07	1.58857e+07	Peak Found	High
High	Master Protein	Q9D0R2	Threonine--tRNA ligase 1, cytoplasmic OS=Mus musculus OX=10090 GN=Tars1 PE=1 SV=2	30	28	83.3	1.6322e+07	1.55046e+07	High	High
High	Master Protein	Q64737	Trifunctional purine biosynthetic protein adenosine-3 OS=Mus musculus OX=10090 GN=Gart PE=1 SV=3	27	28	107.4	2.6692e+07	2.48445e+07	High	High
High	Master Protein	D3Z7X7	Tumor protein D52 (Fragment) OS=Mus musculus OX=10090 GN=Tpd52 PE=1 SV=1	53	28	22.5	5.65521e+07	5.51789e+07	High	High
High	Master Protein	P54728	UV excision repair protein RAD23 homolog B OS=Mus musculus OX=10090 GN=Rad23b PE=1 SV=2	45	28	43.5	3.34179e+07	2.79251e+07	High	High
High	Master Protein	P46460	Vesicle-fusing ATPase OS=Mus musculus OX=10090 GN=Nsf PE=1 SV=2	33	28	82.6	1.73218e+07	1.47755e+07	High	High
High	Master Protein	P97351	40S ribosomal protein S3a OS=Mus musculus OX=10090 GN=Rps3a PE=1 SV=3	55	27	29.9	1.97904e+07	1.96556e+07	High	High
High	Master Protein	Q62167	ATP-dependent RNA helicase DDX3X OS=Mus musculus OX=10090 GN=Ddx3x PE=1 SV=3	34	27	73.1	1.55263e+07	1.24947e+07	High	High
High	Master Protein	P14106	Complement C1q subcomponent subunit B OS=Mus musculus OX=10090 GN=C1qb PE=1 SV=2	52	27	26.7	6.53244e+07	8.61482e+07	High	High
High	Master Protein	Q9WUM3	Coronin-1B OS=Mus musculus OX=10090 GN=Coro1b PE=1 SV=1	39	27	53.9	7.4744e+07	7.18062e+07	High	High
High	Master Protein	Q9WTX6	Cullin-1 OS=Mus musculus OX=10090 GN=Cul1 PE=1 SV=1	27	27	89.6	1.57976e+07	1.34297e+07	High	High
High	Master Protein	P98078	Disabled homolog 2 OS=Mus musculus OX=10090 GN=Dab2 PE=1 SV=2	29	27	82.3	2.9583e+07	2.73124e+07	High	High
High	Master Protein	Q62418	Drebrin-like protein OS=Mus musculus OX=10090 GN=Dbnl PE=1 SV=2	36	27	48.7	1.45059e+07	1.29578e+07	High	High
High	Master Protein	Q7TMK9	Heterogeneous nuclear ribonucleoprotein Q OS=Mus musculus OX=10090 GN=Syncrip PE=1 SV=2	34	27	69.6	3.81795e+07	3.6661e+07	High	High
High	Master Protein	Q9Z204	Heterogeneous nuclear ribonucleoproteins C1/C2 OS=Mus musculus OX=10090 GN=Hnrnpc PE=1 SV=1	44	27	34.4	5.59166e+07	5.04982e+07	High	High
High	Master Protein	P84228	Histone H3.2 OS=Mus musculus OX=10090 GN=Hist1h3b PE=1 SV=2	60	27	15.4	6.06014e+08	5.11e+08	High	High
High	Master Protein	Q60972	Histone-binding protein RBBP4 OS=Mus musculus OX=10090 GN=Rbbp4 PE=1 SV=5	52	27	47.6	4.17422e+07	4.06666e+07	High	High
High	Master Protein	P21619	Lamin-B2 OS=Mus musculus OX=10090 GN=Lmnb2 PE=1 SV=2	32	27	67.3	5.74534e+06	4.96453e+06	High	High
High	Master Protein	Q3UZ39	Leucine-rich repeat flightless-interacting protein 1 OS=Mus musculus OX=10090 GN=Lrrfip1 PE=1 SV=2	35	27	79.2	6.76141e+06	6.99618e+06	High	High
High	Master Protein	Q8R2P8	Lysine--tRNA ligase OS=Mus musculus OX=10090 GN=Kars PE=1 SV=1	32	27	71.2	26424463	2.75728e+07	High	High
High	Master Protein	P70441	Na(+)/H(+) exchange regulatory cofactor NHE-RF1 OS=Mus musculus OX=10090 GN=Slc9a3r1 PE=1 SV=3	53	27	38.6	2.12886e+07	1.96345e+07	High	High
High	Master Protein	P82343	N-acylglucosamine 2-epimerase OS=Mus musculus OX=10090 GN=Renbp PE=1 SV=3	39	27	49.7	3.24403e+07	2.66765e+07	High	High
High	Master Protein	O35685	Nuclear migration protein nudC OS=Mus musculus OX=10090 GN=Nudc PE=1 SV=1	53	27	38.3	1.91796e+07	1.97116e+07	High	High
High	Master Protein	P30416	Peptidyl-prolyl cis-trans isomerase FKBP4 OS=Mus musculus OX=10090 GN=Fkbp4 PE=1 SV=5	40	27	51.5	1.90201e+07	1.73276e+07	High	High
High	Master Protein	Q61990	Poly(rC)-binding protein 2 OS=Mus musculus OX=10090 GN=Pcbp2 PE=1 SV=1	41	27	38.2	8.71625e+06	1.20737e+07	High	High
High	Master Protein	Q8BK67	Protein RCC2 OS=Mus musculus OX=10090 GN=Rcc2 PE=1 SV=1	42	27	55.9	2.3249e+07	2.27178e+07	High	High
High	Master Protein	P97855	Ras GTPase-activating protein-binding protein 1 OS=Mus musculus OX=10090 GN=G3bp1 PE=1 SV=1	51	27	51.8	2.33236e+07	2.47243e+07	High	High
High	Master Protein	G3X972	Sec24-related gene family, member C (S. cerevisiae) OS=Mus musculus OX=10090 GN=Sec24c PE=1 SV=1	18	27	118.5	1.91807e+07	1.83595e+07	High	High
High	Master Protein	Q9R0P3	S-formylglutathione hydrolase OS=Mus musculus OX=10090 GN=Esd PE=1 SV=1	56	27	31.3	1.01353e+08	9.1371e+07	High	High
High	Master Protein	Q9R1T2	SUMO-activating enzyme subunit 1 OS=Mus musculus OX=10090 GN=Sae1 PE=1 SV=1	57	27	38.6	2.06836e+07	1.85893e+07	High	High
High	Master Protein	A0A498WGD8	Thioredoxin-like protein 1 OS=Mus musculus OX=10090 GN=Txnl1 PE=1 SV=1	59	27	32.7	3.78692e+07	3.37623e+07	High	High
High	Master Protein	Q62318	Transcription intermediary factor 1-beta OS=Mus musculus OX=10090 GN=Trim28 PE=1 SV=3	27	27	88.8	2.06187e+07	2.23131e+07	High	High
High	Master Protein	Q8BFY9	Transportin-1 OS=Mus musculus OX=10090 GN=Tnpo1 PE=1 SV=2	25	27	102.3	1.67605e+07	1.75492e+07	High	High
High	Master Protein	Q91WQ3	Tyrosine--tRNA ligase, cytoplasmic OS=Mus musculus OX=10090 GN=Yars PE=1 SV=3	37	27	59.1	1.47409e+07	1.61189e+07	High	High
High	Master Protein	Q6A4J8	Ubiquitin carboxyl-terminal hydrolase 7 OS=Mus musculus OX=10090 GN=Usp7 PE=1 SV=1	21	27	128.4	8.35023e+06	7.03269e+06	High	High
High	Master Protein	Q9QZ88	Vacuolar protein sorting-associated protein 29 OS=Mus musculus OX=10090 GN=Vps29 PE=1 SV=1	54	27	20.5	4.2114e+07	3.62832e+07	High	High
High	Master Protein	Q9D6Y9	1,4-alpha-glucan-branching enzyme OS=Mus musculus OX=10090 GN=Gbe1 PE=1 SV=1	32	26	80.3	9.2408e+06	1.03545e+07	High	High
High	Master Protein	Q8BJY1	26S proteasome non-ATPase regulatory subunit 5 OS=Mus musculus OX=10090 GN=Psmd5 PE=1 SV=4	45	26	55.9	2.28106e+07	2.04807e+07	High	High
High	Master Protein	P84078	ADP-ribosylation factor 1 OS=Mus musculus OX=10090 GN=Arf1 PE=1 SV=2	62	26	20.7	5.5653e+07	4.90169e+07	High	High
High	Master Protein	Q9EPB4	Apoptosis-associated speck-like protein containing a CARD OS=Mus musculus OX=10090 GN=Pycard PE=1 SV=1	77	26	21.4	6.08776e+07	5.37622e+07	High	High
High	Master Protein	Q9JIX8	Apoptotic chromatin condensation inducer in the nucleus OS=Mus musculus OX=10090 GN=Acin1 PE=1 SV=3	18	26	150.6	8.39459e+06	7.04975e+06	High	High
High	Master Protein	P05132	cAMP-dependent protein kinase catalytic subunit alpha OS=Mus musculus OX=10090 GN=Prkaca PE=1 SV=3	49	26	40.5	2.74243e+07	2.47808e+07	High	High
High	Master Protein	Q9QZQ8	Core histone macro-H2A.1 OS=Mus musculus OX=10090 GN=H2afy PE=1 SV=3	47	26	39.7	4.04082e+07	3.21068e+07	High	High
High	Master Protein	P10630	Eukaryotic initiation factor 4A-II OS=Mus musculus OX=10090 GN=Eif4a2 PE=1 SV=2	33	26	46.4	67957.7	66051.6	High	Peak Found
High	Master Protein	A0A0G2JGW9	Far upstream element-binding protein 1 OS=Mus musculus OX=10090 GN=Fubp1 PE=1 SV=1	31	26	67.5	1.2735e+07	1.01968e+07	High	High
High	Master Protein	A2AQ43	Formin-binding protein 1 OS=Mus musculus OX=10090 GN=Fnbp1 PE=1 SV=1	28	26	64.6	1.5654e+07	1.0936e+07	High	High
High	Master Protein	A6PWS5	Gelsolin (Fragment) OS=Mus musculus OX=10090 GN=Gsn PE=1 SV=1	48	26	28	759587	668920	High	Peak Found
High	Master Protein	P14901	Heme oxygenase 1 OS=Mus musculus OX=10090 GN=Hmox1 PE=1 SV=1	63	26	32.9	3.91372e+07	3.73656e+07	High	High
High	Master Protein	Q61191	Host cell factor 1 OS=Mus musculus OX=10090 GN=Hcfc1 PE=1 SV=2	10	26	210.3	1.22452e+07	1.1877e+07	High	High
High	Master Protein	Q09014	Neutrophil cytosol factor 1 OS=Mus musculus OX=10090 GN=Ncf1 PE=1 SV=3	63	26	44.6	2.07859e+07	1.67797e+07	High	High
High	Master Protein	Q7M6Y3	Phosphatidylinositol-binding clathrin assembly protein OS=Mus musculus OX=10090 GN=Picalm PE=1 SV=1	26	26	71.5	3.36175e+07	2.92953e+07	High	High
High	Master Protein	Q921K2	Poly [ADP-ribose] polymerase OS=Mus musculus OX=10090 GN=Parp1 PE=1 SV=1	26	26	112.7	1.62268e+07	1.43603e+07	High	High
High	Master Protein	Q9Z2U1	Proteasome subunit alpha type-5 OS=Mus musculus OX=10090 GN=Psma5 PE=1 SV=1	44	26	26.4	5.7078e+07	5.05386e+07	High	High
High	Master Protein	Q9R1P3	Proteasome subunit beta type-2 OS=Mus musculus OX=10090 GN=Psmb2 PE=1 SV=1	56	26	22.9	9.36031e+07	8.86546e+07	High	High
High	Master Protein	P28063	Proteasome subunit beta type-8 OS=Mus musculus OX=10090 GN=Psmb8 PE=1 SV=2	48	26	30.2	5.54346e+07	5.49718e+07	High	High
High	Master Protein	Q99LX0	Protein/nucleic acid deglycase DJ-1 OS=Mus musculus OX=10090 GN=Park7 PE=1 SV=1	67	26	20	5.70244e+07	4.90847e+07	High	High
High	Master Protein	P42208	Septin-2 OS=Mus musculus OX=10090 GN=Septin2 PE=1 SV=2	55	26	41.5	3.11288e+07	2.59081e+07	High	High
High	Master Protein	Q8C483	Serine--tRNA ligase, cytoplasmic OS=Mus musculus OX=10090 GN=Sars PE=1 SV=1	37	26	61.1	2.63616e+07	2.13443e+07	High	High
High	Master Protein	P54227	Stathmin OS=Mus musculus OX=10090 GN=Stmn1 PE=1 SV=2	66	26	17.3	4.24564e+07	4.87234e+07	High	High
High	Master Protein	P70460	Vasodilator-stimulated phosphoprotein OS=Mus musculus OX=10090 GN=Vasp PE=1 SV=4	45	26	39.6	2.29042e+07	2.06313e+07	High	High
High	Master Protein	P62334	26S proteasome regulatory subunit 10B OS=Mus musculus OX=10090 GN=Psmc6 PE=1 SV=1	47	25	44.1	1.97587e+07	1.98698e+07	High	High
High	Master Protein	Q9WV54	Acid ceramidase OS=Mus musculus OX=10090 GN=Asah1 PE=1 SV=1	36	25	44.6	2.42167e+07	2.45721e+07	High	High
High	Master Protein	O35381	Acidic leucine-rich nuclear phosphoprotein 32 family member A OS=Mus musculus OX=10090 GN=Anp32a PE=1 SV=1	46	25	28.5	6.42774e+07	5.6203e+07	High	High
High	Master Protein	A0A1W2P733	C-1-tetrahydrofolate synthase, cytoplasmic OS=Mus musculus OX=10090 GN=Mthfd1 PE=1 SV=1	34	25	82	1.16808e+07	9.60026e+06	High	High
High	Master Protein	Q9CXW3	Calcyclin-binding protein OS=Mus musculus OX=10090 GN=Cacybp PE=1 SV=1	66	25	26.5	2.90656e+07	2.89597e+07	High	High
High	Master Protein	A0A494BBB0	Calpain-1 catalytic subunit (Fragment) OS=Mus musculus OX=10090 GN=Capn1 PE=1 SV=1	29	25	80.3	1.66344e+07	1.47464e+07	High	High
High	Master Protein	Q9DBC7	cAMP-dependent protein kinase type I-alpha regulatory subunit OS=Mus musculus OX=10090 GN=Prkar1a PE=1 SV=3	44	25	43.2	2.6761e+07	2.66094e+07	High	High
High	Master Protein	Q922J3	CAP-Gly domain-containing linker protein 1 OS=Mus musculus OX=10090 GN=Clip1 PE=1 SV=1	16	25	155.7	5.38862e+06	4.11199e+06	High	High
High	Master Protein	P43274	Histone H1.4 OS=Mus musculus OX=10090 GN=H1-4 PE=1 SV=2	32	25	22	2.52918e+07	1.98726e+07	High	High
High	Master Protein	Q3THW5	Histone H2A.V OS=Mus musculus OX=10090 GN=H2afv PE=1 SV=3	54	25	13.5	74404561	6.02581e+07	High	High
High	Master Protein	L7N451	Interferon-induced very large GTPase 1 OS=Mus musculus OX=10090 GN=Gvin1 PE=1 SV=1	9	25	280.6	8.47919e+06	7.63546e+06	High	High
High	Master Protein	G3X957	Liprin-beta-2 OS=Mus musculus OX=10090 GN=Ppfibp2 PE=1 SV=1	27	25	98.6	7.25861e+06	5.18185e+06	High	High
High	Master Protein	P63085	Mitogen-activated protein kinase 1 OS=Mus musculus OX=10090 GN=Mapk1 PE=1 SV=3	50	25	41.2	3.28297e+07	3.23515e+07	High	High
High	Master Protein	Q9DCL9	Multifunctional protein ADE2 OS=Mus musculus OX=10090 GN=Paics PE=1 SV=4	31	25	47	1.75489e+07	1.20994e+07	High	High
High	Master Protein	Q3UEB3	Poly(U)-binding-splicing factor PUF60 OS=Mus musculus OX=10090 GN=Puf60 PE=1 SV=2	36	25	60.2	1.63845e+07	1.27412e+07	High	High
High	Master Protein	P17918	Proliferating cell nuclear antigen OS=Mus musculus OX=10090 GN=Pcna PE=1 SV=2	59	25	28.8	2.7438e+07	2.5866e+07	High	High
High	Master Protein	P99026	Proteasome subunit beta type-4 OS=Mus musculus OX=10090 GN=Psmb4 PE=1 SV=1	48	25	29.1	6.78904e+07	5.93735e+07	High	High
High	Master Protein	Q80WQ2	Protein VAC14 homolog OS=Mus musculus OX=10090 GN=Vac14 PE=1 SV=1	29	25	88	1.63949e+07	1.26757e+07	High	High
High	Master Protein	Q9D031	Ras suppressor protein 1 OS=Mus musculus OX=10090 GN=Rsu1 PE=1 SV=1	64	25	31.4	3.65623e+07	3.3336e+07	High	High
High	Master Protein	H7BX95	Serine/arginine-rich-splicing factor 1 OS=Mus musculus OX=10090 GN=Srsf1 PE=1 SV=1	36	25	28.3	1.61526e+07	1.47688e+07	High	High
High	Master Protein	Q3TKD0	Transportin-1 (Fragment) OS=Mus musculus OX=10090 GN=Tnpo1 PE=1 SV=1	26	25	91.7	456502	584011	High	High
High	Master Protein	Q3U5Q7	UMP-CMP kinase 2, mitochondrial OS=Mus musculus OX=10090 GN=Cmpk2 PE=1 SV=2	38	25	50	4.61026e+07	4.15551e+07	High	High
High	Master Protein	P26516	26S proteasome non-ATPase regulatory subunit 7 OS=Mus musculus OX=10090 GN=Psmd7 PE=1 SV=2	54	24	36.5	3.78756e+07	3.34453e+07	High	High
High	Master Protein	Q6ZWN5	40S ribosomal protein S9 OS=Mus musculus OX=10090 GN=Rps9 PE=1 SV=3	44	24	22.6	4.05868e+07	3.36995e+07	High	High
High	Master Protein	Q99KI0	Aconitate hydratase, mitochondrial OS=Mus musculus OX=10090 GN=Aco2 PE=1 SV=1	29	24	85.4	1.40398e+07	1.11908e+07	High	High
High	Master Protein	P46664	Adenylosuccinate synthetase isozyme 2 OS=Mus musculus OX=10090 GN=Adss2 PE=1 SV=2	37	24	50	2.49641e+07	2.48517e+07	High	High
High	Master Protein	P61164	Alpha-centractin OS=Mus musculus OX=10090 GN=Actr1a PE=1 SV=1	53	24	42.6	3.43944e+07	3.09193e+07	High	High
High	Master Protein	P29416	Beta-hexosaminidase subunit alpha OS=Mus musculus OX=10090 GN=Hexa PE=1 SV=2	37	24	60.6	3.64752e+07	3.70748e+07	High	High
High	Master Protein	A0A0R4J092	Beta-mannosidase OS=Mus musculus OX=10090 GN=Manba PE=1 SV=1	24	24	100.8	7.5284e+06	8.11601e+06	High	High
High	Master Protein	Q91XV3	Brain acid soluble protein 1 OS=Mus musculus OX=10090 GN=Basp1 PE=1 SV=3	84	24	22.1	5.83322e+06	1.0717e+07	High	High
High	Master Protein	Q9QXK3	Coatomer subunit gamma-2 OS=Mus musculus OX=10090 GN=Copg2 PE=1 SV=1	23	24	97.6	9.1884e+06	8.66075e+06	High	High
High	Master Protein	Q9CPY7	Cytosol aminopeptidase OS=Mus musculus OX=10090 GN=Lap3 PE=1 SV=3	45	24	56.1	1.54808e+07	1.39097e+07	High	High
High	Master Protein	Q6ZWX6	Eukaryotic translation initiation factor 2 subunit 1 OS=Mus musculus OX=10090 GN=Eif2s1 PE=1 SV=3	58	24	36.1	2.84859e+07	2.47524e+07	High	High
High	Master Protein	Q9CQM9	Glutaredoxin-3 OS=Mus musculus OX=10090 GN=Glrx3 PE=1 SV=1	47	24	37.8	2.33139e+07	2.36033e+07	High	High
High	Master Protein	Q8HWB2	Histocompatibility 2, Q region locus 4 OS=Mus musculus OX=10090 GN=H2-Q4 PE=1 SV=1	30	24	39.6	4.40826e+06	5.18242e+06	High	High
High	Master Protein	Q9DAR7	m7GpppX diphosphatase OS=Mus musculus OX=10090 GN=Dcps PE=1 SV=1	52	24	39	2.41912e+07	2.21604e+07	High	High
High	Master Protein	Q8C052	Microtubule-associated protein 1S OS=Mus musculus OX=10090 GN=Map1s PE=1 SV=2	17	24	102.9	8.2692e+06	7.19758e+06	High	High
High	Master Protein	Q61166	Microtubule-associated protein RP/EB family member 1 OS=Mus musculus OX=10090 GN=Mapre1 PE=1 SV=3	54	24	30	3.12106e+07	2.93442e+07	High	High
High	Master Protein	Q63844	Mitogen-activated protein kinase 3 OS=Mus musculus OX=10090 GN=Mapk3 PE=1 SV=5	46	24	43	2.03421e+07	1.74836e+07	High	High
High	Master Protein	Q9CZ30	Obg-like ATPase 1 OS=Mus musculus OX=10090 GN=Ola1 PE=1 SV=1	41	24	44.7	2.65472e+07	2.78748e+07	High	High
High	Master Protein	Q8K124	Pleckstrin homology domain-containing family O member 2 OS=Mus musculus OX=10090 GN=Plekho2 PE=1 SV=1	40	24	53.8	1.26054e+07	1.35279e+07	High	High
High	Master Protein	Q99KP6	Pre-mRNA-processing factor 19 OS=Mus musculus OX=10090 GN=Prpf19 PE=1 SV=1	43	24	55.2	2.27969e+07	1.78841e+07	High	High
High	Master Protein	Q9JJ28	Protein flightless-1 homolog OS=Mus musculus OX=10090 GN=Flii PE=1 SV=1	19	24	144.7	7.57118e+06	7.39255e+06	High	High
High	Master Protein	Q3TU36	RAP1, GTP-GDP dissociation stimulator 1 OS=Mus musculus OX=10090 GN=Rap1gds1 PE=1 SV=1	28	24	66	1.42431e+07	1.23945e+07	High	High
High	Master Protein	P68040	Receptor of activated protein C kinase 1 OS=Mus musculus OX=10090 GN=Rack1 PE=1 SV=3	50	24	35.1	4.9668e+07	4.62698e+07	High	High
High	Master Protein	Q9QXJ2	Signal transducer and activator of transcription OS=Mus musculus OX=10090 GN=Stat2 PE=1 SV=1	24	24	105.3	1.07839e+07	9.73363e+06	High	High
High	Master Protein	Q80YQ1	Thrombospondin-1 OS=Mus musculus OX=10090 GN=Thbs1 PE=1 SV=1	13	24	129.6	1.36029e+07	1.36203e+07	High	High
High	Master Protein	P10711	Transcription elongation factor A protein 1 OS=Mus musculus OX=10090 GN=Tcea1 PE=1 SV=2	40	24	33.9	1.32876e+07	1.19125e+07	High	High
High	Master Protein	Q8CAY6	Acetyl-CoA acetyltransferase, cytosolic OS=Mus musculus OX=10090 GN=Acat2 PE=1 SV=2	37	23	41.3	1.51828e+07	1.37739e+07	High	High
High	Master Protein	Q5SSL4	Active breakpoint cluster region-related protein OS=Mus musculus OX=10090 GN=Abr PE=1 SV=1	27	23	97.6	1.28107e+07	9.73036e+06	High	High
High	Master Protein	P31786	Acyl-CoA-binding protein OS=Mus musculus OX=10090 GN=Dbi PE=1 SV=2	80	23	10	1.21194e+08	1.06168e+08	High	High
High	Master Protein	Q3TVK3	Aspartyl aminopeptidase OS=Mus musculus OX=10090 GN=Dnpep PE=1 SV=1	48	23	52.4	3.09327e+07	2.98189e+07	High	High
High	Master Protein	P23780	Beta-galactosidase OS=Mus musculus OX=10090 GN=Glb1 PE=1 SV=1	24	23	73.1	1.42841e+07	1.38224e+07	High	High
High	Master Protein	D3Z6Q9	Bridging integrator 2 OS=Mus musculus OX=10090 GN=Bin2 PE=1 SV=1	35	23	52.5	1.58237e+07	1.44317e+07	High	High
High	Master Protein	Q9Z1Q5	Chloride intracellular channel protein 1 OS=Mus musculus OX=10090 GN=Clic1 PE=1 SV=3	68	23	27	8.95776e+07	8.23839e+07	High	High
High	Master Protein	O88544	COP9 signalosome complex subunit 4 OS=Mus musculus OX=10090 GN=Cops4 PE=1 SV=1	47	23	46.3	1.3832e+07	1.32548e+07	High	High
High	Master Protein	Q8R1Q8	Cytoplasmic dynein 1 light intermediate chain 1 OS=Mus musculus OX=10090 GN=Dync1li1 PE=1 SV=1	32	23	56.6	1.62384e+07	1.44904e+07	High	High
High	Master Protein	P97821	Dipeptidyl peptidase 1 OS=Mus musculus OX=10090 GN=Ctsc PE=1 SV=1	30	23	52.3	3.22197e+07	3.47357e+07	High	High
High	Master Protein	Q80T06	Elongation factor 1-delta OS=Mus musculus OX=10090 GN=Eef1d PE=1 SV=1	60	23	31.3	5.50427e+07	4.68265e+07	High	High
High	Master Protein	Q9DCH4	Eukaryotic translation initiation factor 3 subunit F OS=Mus musculus OX=10090 GN=Eif3f PE=1 SV=2	55	23	38	2.79148e+07	3.02452e+07	High	High
High	Master Protein	Q91WK2	Eukaryotic translation initiation factor 3 subunit H OS=Mus musculus OX=10090 GN=Eif3h PE=1 SV=1	47	23	39.8	1.66032e+07	1.40423e+07	High	High
High	Master Protein	P23591	GDP-L-fucose synthase OS=Mus musculus OX=10090 GN=Tsta3 PE=1 SV=3	43	23	35.9	2.08873e+07	1.87149e+07	High	High
High	Master Protein	Q9Z1Z0	General vesicular transport factor p115 OS=Mus musculus OX=10090 GN=Uso1 PE=1 SV=2	22	23	106.9	1.14421e+07	1.11486e+07	High	High
High	Master Protein	G5E8G0	Heterogeneous nuclear ribonucleoprotein D0 OS=Mus musculus OX=10090 GN=Hnrnpd PE=1 SV=1	41	23	30.6	29381.9	30519.1	High	Peak Found
High	Master Protein	P43276	Histone H1.5 OS=Mus musculus OX=10090 GN=H1-5 PE=1 SV=2	31	23	22.6	4.95287e+07	3.5682e+07	High	High
High	Master Protein	P84244	Histone H3.3 OS=Mus musculus OX=10090 GN=H3-3a PE=1 SV=2	53	23	15.3	2.30193e+06	2.09052e+06	High	High
High	Master Protein	Q61081	Hsp90 co-chaperone Cdc37 OS=Mus musculus OX=10090 GN=Cdc37 PE=1 SV=1	31	23	44.6	1.44827e+07	1.32226e+07	High	High
High	Master Protein	Q9EPL8	Importin-7 OS=Mus musculus OX=10090 GN=Ipo7 PE=1 SV=2	21	23	119.4	1.31035e+07	1.16837e+07	High	High
High	Master Protein	Q9D154	Leukocyte elastase inhibitor A OS=Mus musculus OX=10090 GN=Serpinb1a PE=1 SV=1	42	23	42.5	2.28244e+07	1.74174e+07	High	High
High	Master Protein	P97369	Neutrophil cytosol factor 4 OS=Mus musculus OX=10090 GN=Ncf4 PE=1 SV=2	55	23	38.7	1.72109e+07	1.6443e+07	High	High
High	Master Protein	P24369	Peptidyl-prolyl cis-trans isomerase B OS=Mus musculus OX=10090 GN=Ppib PE=1 SV=2	58	23	23.7	2.91223e+07	2.74329e+07	High	High
High	Master Protein	Q61656	Probable ATP-dependent RNA helicase DDX5 OS=Mus musculus OX=10090 GN=Ddx5 PE=1 SV=2	29	23	69.2	1.61371e+07	1.43292e+07	High	High
High	Master Protein	P49722	Proteasome subunit alpha type-2 OS=Mus musculus OX=10090 GN=Psma2 PE=1 SV=3	54	23	25.9	9.89178e+07	9.20923e+07	High	High
High	Master Protein	P62492	Ras-related protein Rab-11A OS=Mus musculus OX=10090 GN=Rab11a PE=1 SV=3	64	23	24.4	677056	760532	High	High
High	Master Protein	P62821	Ras-related protein Rab-1A OS=Mus musculus OX=10090 GN=Rab1A PE=1 SV=3	54	23	22.7	3.80271e+07	3.33369e+07	High	High
High	Master Protein	Q8BYW1	Rho GTPase-activating protein 25 OS=Mus musculus OX=10090 GN=Arhgap25 PE=1 SV=2	31	23	73.3	1.62687e+07	1.40202e+07	High	High
High	Master Protein	P55194	SH3 domain-binding protein 1 OS=Mus musculus OX=10090 GN=Sh3bp1 PE=1 SV=3	28	23	74.1	4.852e+06	4.6215e+06	High	High
High	Master Protein	Q3UND0	Src kinase-associated phosphoprotein 2 OS=Mus musculus OX=10090 GN=Skap2 PE=1 SV=2	48	23	40.7	2.41049e+07	2.92996e+07	High	High
High	Master Protein	Q8CHC4	Synaptojanin-1 OS=Mus musculus OX=10090 GN=Synj1 PE=1 SV=3	17	23	172.5	1.13286e+07	1.09155e+07	High	High
High	Master Protein	Q9JHJ0	Tropomodulin-3 OS=Mus musculus OX=10090 GN=Tmod3 PE=1 SV=1	45	23	39.5	2.01879e+07	1.91946e+07	High	High
High	Master Protein	D3YWF6	Ubiquitin thioesterase OTUB1 OS=Mus musculus OX=10090 GN=Otub1 PE=1 SV=1	65	23	28	4.432e+07	4.12006e+07	High	High
High	Master Protein	P61087	Ubiquitin-conjugating enzyme E2 K OS=Mus musculus OX=10090 GN=Ube2k PE=1 SV=3	80	23	22.4	2.95219e+07	2.95831e+07	High	High
High	Master Protein	P50518	V-type proton ATPase subunit E 1 OS=Mus musculus OX=10090 GN=Atp6v1e1 PE=1 SV=2	58	23	26.1	3.4597e+07	3.09563e+07	High	High
High	Master Protein	Q8BVE3	V-type proton ATPase subunit H OS=Mus musculus OX=10090 GN=Atp6v1h PE=1 SV=1	39	23	55.8	2.01455e+07	1.89009e+07	High	High
High	Master Protein	P14869	60S acidic ribosomal protein P0 OS=Mus musculus OX=10090 GN=Rplp0 PE=1 SV=3	42	22	34.2	4.85172e+07	4.31705e+07	High	High
High	Master Protein	P28650	Adenylosuccinate synthetase isozyme 1 OS=Mus musculus OX=10090 GN=Adss1 PE=1 SV=2	41	22	50.2	1.29865e+07	1.16776e+07	High	High
High	Master Protein	A0A1B0GSU0	Aldehyde dehydrogenase family 16 member A1 OS=Mus musculus OX=10090 GN=Aldh16a1 PE=1 SV=1	24	22	84.7	1.81726e+07	1.65395e+07	High	High
High	Master Protein	Q8R5A3	Amyloid beta A4 precursor protein-binding family B member 1-interacting protein OS=Mus musculus OX=10090 GN=Apbb1ip PE=1 SV=2	26	22	74.3	1.69399e+07	1.5621e+07	High	High
High	Master Protein	P35585	AP-1 complex subunit mu-1 OS=Mus musculus OX=10090 GN=Ap1m1 PE=1 SV=3	42	22	48.5	3.02409e+07	2.24969e+07	High	High
High	Master Protein	Q4LDD4	Arf-GAP with Rho-GAP domain, ANK repeat and PH domain-containing protein 1 OS=Mus musculus OX=10090 GN=Arap1 PE=1 SV=2	14	22	162.2	6.35646e+07	5.73984e+07	High	High
High	Master Protein	Q810A7	ATP-dependent RNA helicase DDX42 OS=Mus musculus OX=10090 GN=Ddx42 PE=1 SV=3	21	22	101.9	8.15923e+06	7.3067e+06	High	High
High	Master Protein	Q9JLV6	Bifunctional polynucleotide phosphatase/kinase OS=Mus musculus OX=10090 GN=Pnkp PE=1 SV=2	34	22	57.2	1.91184e+07	1.66144e+07	High	High
High	Master Protein	Q60865	Caprin-1 OS=Mus musculus OX=10090 GN=Caprin1 PE=1 SV=2	25	22	78.1	2.77189e+07	2.58798e+07	High	High
High	Master Protein	P61202	COP9 signalosome complex subunit 2 OS=Mus musculus OX=10090 GN=Cops2 PE=1 SV=1	30	22	51.6	1.34359e+07	1.26766e+07	High	High
High	Master Protein	Q62426	Cystatin-B OS=Mus musculus OX=10090 GN=Cstb PE=1 SV=1	76	22	11	2.15148e+08	2.33796e+08	High	High
High	Master Protein	A0A0R4J1L2	Elongation factor 1-delta OS=Mus musculus OX=10090 GN=Eef1d PE=1 SV=1	61	22	28.7	2.6936e+06	1.80843e+06	High	High
High	Master Protein	A0A3B2WB50	EMILIN-2 OS=Mus musculus OX=10090 GN=Emilin2 PE=1 SV=1	18	22	108.4	7.43715e+06	8.39497e+06	High	High
High	Master Protein	Q60902	Epidermal growth factor receptor substrate 15-like 1 OS=Mus musculus OX=10090 GN=Eps15l1 PE=1 SV=3	20	22	99.2	8.40912e+06	7.83512e+06	High	High
High	Master Protein	P60229	Eukaryotic translation initiation factor 3 subunit E OS=Mus musculus OX=10090 GN=Eif3e PE=1 SV=1	36	22	52.2	2.50225e+07	2.23332e+07	High	High
High	Master Protein	D3Z0U9	Extracellular matrix protein 1 (Fragment) OS=Mus musculus OX=10090 GN=Ecm1 PE=1 SV=1	60	22	28.3	1.27843e+06	1.38707e+06	High	High
High	Master Protein	O70310	Glycylpeptide N-tetradecanoyltransferase 1 OS=Mus musculus OX=10090 GN=Nmt1 PE=1 SV=1	39	22	56.9	1.79329e+07	1.59826e+07	High	High
High	Master Protein	P62827	GTP-binding nuclear protein Ran OS=Mus musculus OX=10090 GN=Ran PE=1 SV=3	40	22	24.4	1.30591e+08	1.13749e+08	High	High
High	Master Protein	Q60973	Histone-binding protein RBBP7 OS=Mus musculus OX=10090 GN=Rbbp7 PE=1 SV=1	31	22	47.8	5.55148e+06	4.96116e+06	High	High
High	Master Protein	F8WJK8	Hsc70-interacting protein OS=Mus musculus OX=10090 GN=St13 PE=1 SV=1	22	22	40.5	4.02693e+07	3.43634e+07	High	High
High	Master Protein	Q542I8	Integrin beta OS=Mus musculus OX=10090 GN=Itgb2 PE=1 SV=1	22	22	84.8	1.75787e+07	1.69356e+07	High	High
High	Master Protein	Q9CXY6	Interleukin enhancer-binding factor 2 OS=Mus musculus OX=10090 GN=Ilf2 PE=1 SV=1	41	22	43	1.64632e+07	2.20426e+07	High	High
High	Master Protein	Q61033	Lamina-associated polypeptide 2, isoforms alpha/zeta OS=Mus musculus OX=10090 GN=Tmpo PE=1 SV=4	21	22	75.1	218852	135004	High	High
High	Master Protein	P32067	Lupus La protein homolog OS=Mus musculus OX=10090 GN=Ssb PE=1 SV=1	31	22	47.7	1.16876e+07	1.025e+07	High	High
High	Master Protein	P97333	Neuropilin-1 OS=Mus musculus OX=10090 GN=Nrp1 PE=1 SV=2	20	22	102.9	1.55493e+07	1.71412e+07	High	High
High	Master Protein	P27612	Phospholipase A-2-activating protein OS=Mus musculus OX=10090 GN=Plaa PE=1 SV=4	22	22	87.2	8.9472e+06	8.14912e+06	High	High
High	Master Protein	P54823	Probable ATP-dependent RNA helicase DDX6 OS=Mus musculus OX=10090 GN=Ddx6 PE=1 SV=1	44	22	54.2	1.33072e+07	1.03652e+07	High	High
High	Master Protein	P46638	Ras-related protein Rab-11B OS=Mus musculus OX=10090 GN=Rab11b PE=1 SV=3	60	22	24.5	4.32468e+07	3.68693e+07	High	Peak Found
High	Master Protein	Q8BTI8	Serine/arginine repetitive matrix protein 2 OS=Mus musculus OX=10090 GN=Srrm2 PE=1 SV=3	8	22	294.7	3.06743e+06	3.38342e+06	High	High
High	Master Protein	Q9Z1Z2	Serine-threonine kinase receptor-associated protein OS=Mus musculus OX=10090 GN=Strap PE=1 SV=2	47	22	38.4	2.3732e+07	2.07938e+07	High	High
High	Master Protein	Q9JJU8	SH3 domain-binding glutamic acid-rich-like protein OS=Mus musculus OX=10090 GN=Sh3bgrl PE=1 SV=1	85	22	12.8	4.87917e+07	4.94973e+07	High	High
High	Master Protein	Q78ZM0	Sorting nexin-3 OS=Mus musculus OX=10090 GN=Snx3 PE=1 SV=1	65	22	18.8	5.63853e+07	4.25682e+07	High	High
High	Master Protein	Q3UJB0	Splicing factor 3b, subunit 2 OS=Mus musculus OX=10090 GN=Sf3b2 PE=1 SV=1	23	22	98.1	1.08554e+07	9.47218e+06	High	High
High	Master Protein	A2AUD5	Tumor protein D54 OS=Mus musculus OX=10090 GN=Tpd52l2 PE=1 SV=1	53	22	25.1	1.43546e+07	1.35519e+07	High	High
High	Master Protein	Q9WUP7	Ubiquitin carboxyl-terminal hydrolase isozyme L5 OS=Mus musculus OX=10090 GN=Uchl5 PE=1 SV=2	45	22	37.6	1.24292e+07	1.05896e+07	High	High
High	Master Protein	Q9D906	Ubiquitin-like modifier-activating enzyme ATG7 OS=Mus musculus OX=10090 GN=Atg7 PE=1 SV=1	30	22	77.5	1.3231e+07	1.15538e+07	High	High
High	Master Protein	Q8C0E2	Vacuolar protein sorting-associated protein 26B OS=Mus musculus OX=10090 GN=Vps26b PE=1 SV=1	38	22	39.1	6.52992e+06	5.8256e+06	High	High
High	Master Protein	Q8VI93	2'-5'-oligoadenylate synthase 3 OS=Mus musculus OX=10090 GN=Oas3 PE=1 SV=1	22	21	126.3	1.07492e+07	8.86608e+06	High	High
High	Master Protein	Q921H8	3-ketoacyl-CoA thiolase A, peroxisomal OS=Mus musculus OX=10090 GN=Acaa1a PE=1 SV=1	47	21	43.9	2.07608e+07	1.63817e+07	High	High
High	Master Protein	P62702	40S ribosomal protein S4, X isoform OS=Mus musculus OX=10090 GN=Rps4x PE=1 SV=2	41	21	29.6	2.6833e+07	2.60426e+07	High	High
High	Master Protein	Q8BG07	5'-3' exonuclease PLD4 OS=Mus musculus OX=10090 GN=Pld4 PE=1 SV=1	36	21	56.1	2.50988e+07	2.33766e+07	High	High
High	Master Protein	P32261	Antithrombin-III OS=Mus musculus OX=10090 GN=Serpinc1 PE=1 SV=1	21	21	52	2.63935e+07	3.29929e+07	High	High
High	Master Protein	P05202	Aspartate aminotransferase, mitochondrial OS=Mus musculus OX=10090 GN=Got2 PE=1 SV=1	32	21	47.4	2.58482e+07	2.73345e+07	High	High
High	Master Protein	Q9JLQ0	CD2-associated protein OS=Mus musculus OX=10090 GN=Cd2ap PE=1 SV=3	26	21	70.4	1.01371e+07	9.18751e+06	High	High
High	Master Protein	Q9QYB1	Chloride intracellular channel protein 4 OS=Mus musculus OX=10090 GN=Clic4 PE=1 SV=3	55	21	28.7	2.22617e+07	2.24905e+07	High	High
High	Master Protein	Q9CQF3	Cleavage and polyadenylation specificity factor subunit 5 OS=Mus musculus OX=10090 GN=Nudt21 PE=1 SV=1	59	21	26.2	2.67677e+07	2.27779e+07	High	High
High	Master Protein	Q02105	Complement C1q subcomponent subunit C OS=Mus musculus OX=10090 GN=C1qc PE=1 SV=2	47	21	26	1.09136e+08	9.4447e+07	High	High
High	Master Protein	Q8C3J5	Dedicator of cytokinesis protein 2 OS=Mus musculus OX=10090 GN=Dock2 PE=1 SV=3	11	21	211.6	7.09308e+06	6056560	High	High
High	Master Protein	P97310	DNA replication licensing factor MCM2 OS=Mus musculus OX=10090 GN=Mcm2 PE=1 SV=3	20	21	102	7.29056e+06	5.64078e+06	High	High
High	Master Protein	O70251	Elongation factor 1-beta OS=Mus musculus OX=10090 GN=Eef1b PE=1 SV=5	53	21	24.7	5.08409e+07	4.52234e+07	High	High
High	Master Protein	Q91VC3	Eukaryotic initiation factor 4A-III OS=Mus musculus OX=10090 GN=Eif4a3 PE=1 SV=3	37	21	46.8	9.17941e+06	7.10193e+06	High	High
High	Master Protein	Q9QZD9	Eukaryotic translation initiation factor 3 subunit I OS=Mus musculus OX=10090 GN=Eif3i PE=1 SV=1	45	21	36.4	1.48542e+07	1.70852e+07	High	High
High	Master Protein	Q6P9Q6	FK506-binding protein 15 OS=Mus musculus OX=10090 GN=Fkbp15 PE=1 SV=2	17	21	132.9	1.16072e+07	1.0409e+07	High	High
High	Master Protein	Q9D0E1	Heterogeneous nuclear ribonucleoprotein M OS=Mus musculus OX=10090 GN=Hnrnpm PE=1 SV=3	25	21	77.6	1.1353e+07	9.57933e+06	High	High
High	Master Protein	Q7TPV4	Myb-binding protein 1A OS=Mus musculus OX=10090 GN=Mybbp1a PE=1 SV=2	13	21	151.9	4.0737e+06	3.44486e+06	High	High
High	Master Protein	Q8BWZ3	N-alpha-acetyltransferase 25, NatB auxiliary subunit OS=Mus musculus OX=10090 GN=Naa25 PE=1 SV=1	19	21	111.6	9.15275e+06	7.91718e+06	High	High
High	Master Protein	Q9CR16	Peptidyl-prolyl cis-trans isomerase D OS=Mus musculus OX=10090 GN=Ppid PE=1 SV=3	34	21	40.7	1.86391e+07	1.76331e+07	High	High
High	Master Protein	P63005	Platelet-activating factor acetylhydrolase IB subunit alpha OS=Mus musculus OX=10090 GN=Pafah1b1 PE=1 SV=2	43	21	46.6	1.77453e+07	1.78253e+07	High	High
High	Master Protein	Q9R1P1	Proteasome subunit beta type-3 OS=Mus musculus OX=10090 GN=Psmb3 PE=1 SV=1	56	21	22.9	5.81025e+07	5.58177e+07	High	High
High	Master Protein	Q9CT10	Ran-binding protein 3 OS=Mus musculus OX=10090 GN=Ranbp3 PE=1 SV=2	36	21	52.5	7.51404e+06	5.85603e+06	High	High
High	Master Protein	Q9JI75	Ribosyldihydronicotinamide dehydrogenase [quinone] OS=Mus musculus OX=10090 GN=Nqo2 PE=1 SV=3	65	21	26.2	1.85447e+07	1.86367e+07	High	High
High	Master Protein	Q9WV02	RNA-binding motif protein, X chromosome OS=Mus musculus OX=10090 GN=Rbmx PE=1 SV=1	31	21	42.3	1.75287e+06	1.44508e+06	High	High
High	Master Protein	Q9D554	Splicing factor 3A subunit 3 OS=Mus musculus OX=10090 GN=Sf3a3 PE=1 SV=2	37	21	58.8	1.0094e+07	9.10644e+06	High	High
High	Master Protein	P20065	Thymosin beta-4 OS=Mus musculus OX=10090 GN=Tmsb4x PE=1 SV=1	50	21	5.7	3.82606e+07	5.05817e+07	High	High
High	Master Protein	P61079	Ubiquitin-conjugating enzyme E2 D3 OS=Mus musculus OX=10090 GN=Ube2d3 PE=1 SV=1	24	21	16.7	2.42013e+07	2.47862e+07	High	High
High	Master Protein	Q9CZX8	40S ribosomal protein S19 OS=Mus musculus OX=10090 GN=Rps19 PE=1 SV=3	50	20	16.1	1.92397e+07	1.51201e+07	High	High
High	Master Protein	Q8CBW3	Abl interactor 1 OS=Mus musculus OX=10090 GN=Abi1 PE=1 SV=3	35	20	52.3	1.53473e+07	1.31473e+07	High	High
High	Master Protein	P45377	Aldose reductase-related protein 2 OS=Mus musculus OX=10090 GN=Akr1b8 PE=1 SV=2	49	20	36.1	6.96737e+07	5.9047e+07	High	High
High	Master Protein	Q9DB05	Alpha-soluble NSF attachment protein OS=Mus musculus OX=10090 GN=Napa PE=1 SV=1	53	20	33.2	1.23272e+07	1.11714e+07	High	High
High	Master Protein	E9PVA6	ARF GTPase-activating protein GIT2 OS=Mus musculus OX=10090 GN=Git2 PE=1 SV=1	22	20	84.4	8.2738e+06	6.91914e+06	High	High
High	Master Protein	P68181	cAMP-dependent protein kinase catalytic subunit beta OS=Mus musculus OX=10090 GN=Prkacb PE=1 SV=2	39	20	40.7	1.82615e+06	2.01563e+06	High	High
High	Master Protein	P48758	Carbonyl reductase [NADPH] 1 OS=Mus musculus OX=10090 GN=Cbr1 PE=1 SV=3	52	20	30.6	1.47483e+07	1.35201e+07	High	High
High	Master Protein	Q9JIG7	Coiled-coil domain-containing protein 22 OS=Mus musculus OX=10090 GN=Ccdc22 PE=1 SV=1	30	20	70.8	8.75364e+06	6.52218e+06	High	High
High	Master Protein	P98086	Complement C1q subcomponent subunit A OS=Mus musculus OX=10090 GN=C1qa PE=1 SV=2	38	20	26	8.2665e+07	9.38953e+07	High	High
High	Master Protein	Q99JX4	Eukaryotic translation initiation factor 3 subunit M OS=Mus musculus OX=10090 GN=Eif3m PE=1 SV=1	43	20	42.5	2.24709e+07	1.45967e+07	High	High
High	Master Protein	Q6PAR5	GTPase-activating protein and VPS9 domain-containing protein 1 OS=Mus musculus OX=10090 GN=Gapvd1 PE=1 SV=2	15	20	162.3	7.36562e+06	7.23003e+06	High	High
High	Master Protein	E9QKZ2	Importin-9 OS=Mus musculus OX=10090 GN=Ipo9 PE=1 SV=1	23	20	115.9	8.76449e+06	1.06603e+07	High	High
High	Master Protein	P24547	Inosine-5'-monophosphate dehydrogenase 2 OS=Mus musculus OX=10090 GN=Impdh2 PE=1 SV=2	28	20	55.8	9.87877e+06	8.52243e+06	High	High
High	Master Protein	O89051	Integral membrane protein 2B OS=Mus musculus OX=10090 GN=Itm2b PE=1 SV=1	43	20	30.2	3.07869e+07	2.66634e+07	High	High
High	Master Protein	D3Z2E7	Interferon-activated gene 207 OS=Mus musculus OX=10090 GN=Ifi207 PE=1 SV=1	13	20	103.8	3.5018e+06	2.68197e+06	High	High
High	Master Protein	A0A1L1STE4	Interleukin enhancer-binding factor 3 OS=Mus musculus OX=10090 GN=Ilf3 PE=1 SV=1	18	20	97.4	1.0851e+07	9.31898e+06	High	High
High	Master Protein	P45700	Mannosyl-oligosaccharide 1,2-alpha-mannosidase IA OS=Mus musculus OX=10090 GN=Man1a1 PE=1 SV=1	30	20	73.2	1.21345e+07	1.37919e+07	High	High
High	Master Protein	Q9D6Y7	Mitochondrial peptide methionine sulfoxide reductase OS=Mus musculus OX=10090 GN=Msra PE=1 SV=1	50	20	26	1.12657e+07	1.02825e+07	High	High
High	Master Protein	Q3THE2	Myosin regulatory light chain 12B OS=Mus musculus OX=10090 GN=Myl12b PE=1 SV=2	51	20	19.8	1.41127e+06	1.19741e+06	High	High
High	Master Protein	Q6ZWQ9	Myosin, light chain 12A, regulatory, non-sarcomeric OS=Mus musculus OX=10090 GN=Myl12a PE=1 SV=1	68	20	19.9	2.71185e+07	2.21704e+07	Peak Found	High
High	Master Protein	Q9DCJ9	N-acetylneuraminate lyase OS=Mus musculus OX=10090 GN=Npl PE=1 SV=1	60	20	35.1	1.65205e+07	1.36416e+07	High	High
High	Master Protein	B1AXN9	Non-specific serine/threonine protein kinase OS=Mus musculus OX=10090 GN=Rps6ka3 PE=1 SV=1	24	20	80.6	8.42947e+06	6.78555e+06	High	High
High	Master Protein	E9Q0A7	Oxidation resistance protein 1 OS=Mus musculus OX=10090 GN=Oxr1 PE=1 SV=1	23	20	91.7	5.9691e+06	4.89455e+06	High	High
High	Master Protein	Q8C0C7	Phenylalanine--tRNA ligase alpha subunit OS=Mus musculus OX=10090 GN=Farsa PE=1 SV=1	33	20	57.6	8.96332e+06	8.57511e+06	High	High
High	Master Protein	Q4VAA2	Protein CDV3 OS=Mus musculus OX=10090 GN=Cdv3 PE=1 SV=2	56	20	29.7	1.25564e+07	1.35212e+07	High	High
High	Master Protein	A0A0R4J0Z1	Protein disulfide-isomerase A4 OS=Mus musculus OX=10090 GN=Pdia4 PE=1 SV=1	24	20	72.3	4.98239e+06	5.23358e+06	High	High
High	Master Protein	Q9DBR7	Protein phosphatase 1 regulatory subunit 12A OS=Mus musculus OX=10090 GN=Ppp1r12a PE=1 SV=2	16	20	114.9	5.2452e+06	4.51924e+06	High	High
High	Master Protein	P51150	Ras-related protein Rab-7a OS=Mus musculus OX=10090 GN=Rab7a PE=1 SV=2	53	20	23.5	4.03252e+07	3.39877e+07	High	High
High	Master Protein	A0A1Y7VMN0	Rho-associated protein kinase 2 (Fragment) OS=Mus musculus OX=10090 GN=Rock2 PE=1 SV=1	12	20	166.7	5.06479e+06	4.93811e+06	High	High
High	Master Protein	Q9R1T4	Septin-6 OS=Mus musculus OX=10090 GN=Septin6 PE=1 SV=4	38	20	49.6	2.95964e+06	3.18416e+06	High	High
High	Master Protein	P63328	Serine/threonine-protein phosphatase 2B catalytic subunit alpha isoform OS=Mus musculus OX=10090 GN=Ppp3ca PE=1 SV=1	21	20	58.6	1.61294e+07	1.49022e+07	High	High
High	Master Protein	P42232	Signal transducer and activator of transcription 5B OS=Mus musculus OX=10090 GN=Stat5b PE=1 SV=1	20	20	89.9	5.48866e+06	4.39868e+06	High	High
High	Master Protein	P48025	Tyrosine-protein kinase SYK OS=Mus musculus OX=10090 GN=Syk PE=1 SV=2	34	20	71.3	7.77114e+06	6.39765e+06	High	High
High	Master Protein	Q11136	Xaa-Pro dipeptidase OS=Mus musculus OX=10090 GN=Pepd PE=1 SV=3	23	20	55	5.98409e+07	4.65677e+07	High	High
High	Master Protein	P54923	[Protein ADP-ribosylarginine] hydrolase OS=Mus musculus OX=10090 GN=Adprh PE=1 SV=1	44	19	40	2.67955e+07	2.60521e+07	High	High
High	Master Protein	Q64433	10 kDa heat shock protein, mitochondrial OS=Mus musculus OX=10090 GN=Hspe1 PE=1 SV=2	69	19	11	3.17026e+07	28626315	High	High
High	Master Protein	O70456	14-3-3 protein sigma OS=Mus musculus OX=10090 GN=Sfn PE=1 SV=2	16	19	27.7	44817500	48989080	High	High
High	Master Protein	Q61112	45 kDa calcium-binding protein OS=Mus musculus OX=10090 GN=Sdf4 PE=1 SV=1	27	19	42	9.18017e+06	1.00984e+07	High	High
High	Master Protein	P11031	Activated RNA polymerase II transcriptional coactivator p15 OS=Mus musculus OX=10090 GN=Sub1 PE=1 SV=3	53	19	14.4	2.13126e+07	1.90083e+07	High	High
High	Master Protein	O35298	Acyloxyacyl hydrolase OS=Mus musculus OX=10090 GN=Aoah PE=1 SV=1	20	19	65.1	9.03176e+06	1.23932e+07	High	High
High	Master Protein	P55264	Adenosine kinase OS=Mus musculus OX=10090 GN=Adk PE=1 SV=2	41	19	40.1	1.13247e+07	9.84048e+06	High	High
High	Master Protein	Q9WTP6	Adenylate kinase 2, mitochondrial OS=Mus musculus OX=10090 GN=Ak2 PE=1 SV=5	52	19	26.5	28766727	2.75721e+07	High	High
High	Master Protein	P47738	Aldehyde dehydrogenase, mitochondrial OS=Mus musculus OX=10090 GN=Aldh2 PE=1 SV=1	33	19	56.5	1.088e+07	1.00967e+07	High	High
High	Master Protein	B1AU25	Apoptosis-inducing factor 1, mitochondrial OS=Mus musculus OX=10090 GN=Aifm1 PE=1 SV=1	29	19	66.1	1.18977e+07	9.60243e+06	High	High
High	Master Protein	P20060	Beta-hexosaminidase subunit beta OS=Mus musculus OX=10090 GN=Hexb PE=1 SV=2	30	19	61.1	2.86341e+07	2.75006e+07	High	High
High	Master Protein	Q8K354	Carbonyl reductase [NADPH] 3 OS=Mus musculus OX=10090 GN=Cbr3 PE=1 SV=1	52	19	30.9	1.54478e+07	1.40422e+07	High	High
High	Master Protein	E9QAS5	Chromodomain-helicase-DNA-binding protein 4 OS=Mus musculus OX=10090 GN=Chd4 PE=1 SV=1	13	19	218.5	4.0495e+06	3.44476e+06	High	High
High	Master Protein	E9Q9M1	Cytosolic purine 5'-nucleotidase OS=Mus musculus OX=10090 GN=Nt5c2 PE=1 SV=1	30	19	67.7	1.62863e+07	1.51773e+07	High	High
High	Master Protein	Q9R0P5	Destrin OS=Mus musculus OX=10090 GN=Dstn PE=1 SV=3	59	19	18.5	2.77802e+07	2.54196e+07	High	High
High	Master Protein	O70194	Eukaryotic translation initiation factor 3 subunit D OS=Mus musculus OX=10090 GN=Eif3d PE=1 SV=2	22	19	63.9	1.42393e+07	1.3972e+07	High	High
High	Master Protein	Q8VHX6	Filamin-C OS=Mus musculus OX=10090 GN=Flnc PE=1 SV=3	4	19	290.9	2.33138e+07	17389156	High	Peak Found
High	Master Protein	Q3THK3	General transcription factor IIF subunit 1 OS=Mus musculus OX=10090 GN=Gtf2f1 PE=1 SV=2	28	19	57.2	4.63236e+06	4.46668e+06	High	High
High	Master Protein	P19157	Glutathione S-transferase P 1 OS=Mus musculus OX=10090 GN=Gstp1 PE=1 SV=2	48	19	23.6	4.91933e+07	4.02748e+07	High	High
High	Master Protein	Q61592	Growth arrest-specific protein 6 OS=Mus musculus OX=10090 GN=Gas6 PE=2 SV=2	21	19	74.6	9.75411e+06	1.00275e+07	High	High
High	Master Protein	B1ATI9	Growth arrest-specific protein 7 OS=Mus musculus OX=10090 GN=Gas7 PE=1 SV=1	33	19	47.2	5.34698e+06	4.87814e+06	High	High
High	Master Protein	Q9Z0E6	Guanylate-binding protein 2 OS=Mus musculus OX=10090 GN=Gbp2 PE=1 SV=1	27	19	66.7	1.7784e+07	1.68104e+07	High	High
High	Master Protein	Q9JHU9	Inositol-3-phosphate synthase 1 OS=Mus musculus OX=10090 GN=Isyna1 PE=1 SV=1	26	19	60.9	2.91142e+07	2.66961e+07	High	High
High	Master Protein	P26645	Myristoylated alanine-rich C-kinase substrate OS=Mus musculus OX=10090 GN=Marcks PE=1 SV=2	40	19	29.6	1.5303e+07	1.64045e+07	High	High
High	Master Protein	Q9JHW2	Omega-amidase NIT2 OS=Mus musculus OX=10090 GN=Nit2 PE=1 SV=1	50	19	30.5	1.57198e+07	1.29611e+07	High	High
High	Master Protein	Q62422	Osteoclast-stimulating factor 1 OS=Mus musculus OX=10090 GN=Ostf1 PE=1 SV=2	41	19	23.8	6.74239e+07	6.79225e+07	High	High
High	Master Protein	A2A8Z1	Oxysterol-binding protein-related protein 9 OS=Mus musculus OX=10090 GN=Osbpl9 PE=1 SV=1	21	19	83.1	8.97466e+06	6.17084e+06	High	High
High	Master Protein	Q8CI51	PDZ and LIM domain protein 5 OS=Mus musculus OX=10090 GN=Pdlim5 PE=1 SV=4	37	19	63.3	1.4618e+07	1.08778e+07	High	High
High	Master Protein	O08807	Peroxiredoxin-4 OS=Mus musculus OX=10090 GN=Prdx4 PE=1 SV=1	20	19	31	534977	442260	High	High
High	Master Protein	A2ADY9	Protein DDI1 homolog 2 OS=Mus musculus OX=10090 GN=Ddi2 PE=1 SV=1	30	19	44.6	1.08518e+07	1.03232e+07	High	High
High	Master Protein	Q9CX34	Protein SGT1 homolog OS=Mus musculus OX=10090 GN=Sugt1 PE=1 SV=3	41	19	38.1	1.22338e+07	1.098e+07	High	High
High	Master Protein	E0CYV0	Protein-L-isoaspartate O-methyltransferase OS=Mus musculus OX=10090 GN=Pcmt1 PE=1 SV=1	47	19	30.4	1.30874e+07	1.22312e+07	High	High
High	Master Protein	Q9Z2Y8	Pyridoxal phosphate homeostasis protein OS=Mus musculus OX=10090 GN=Plpbp PE=1 SV=1	38	19	30	1.79055e+07	1.61589e+07	High	High
High	Master Protein	Q91V41	Ras-related protein Rab-14 OS=Mus musculus OX=10090 GN=Rab14 PE=1 SV=3	55	19	23.9	1.61457e+07	1.39761e+07	High	High
High	Master Protein	Q99P72	Reticulon-4 OS=Mus musculus OX=10090 GN=Rtn4 PE=1 SV=2	16	19	126.5	2.36363e+07	2.08624e+07	High	High
High	Master Protein	Q8K0Q5	Rho GTPase-activating protein 18 OS=Mus musculus OX=10090 GN=Arhgap18 PE=1 SV=1	23	19	74.9	9.68739e+06	7.12565e+06	High	High
High	Master Protein	P56959	RNA-binding protein FUS OS=Mus musculus OX=10090 GN=Fus PE=1 SV=1	20	19	52.6	1.63458e+07	1.45537e+07	High	High
High	Master Protein	Q99LF4	RNA-splicing ligase RtcB homolog OS=Mus musculus OX=10090 GN=Rtcb PE=1 SV=1	34	19	55.2	1.08921e+07	9815638	High	High
High	Master Protein	P60122	RuvB-like 1 OS=Mus musculus OX=10090 GN=Ruvbl1 PE=1 SV=1	33	19	50.2	9.20846e+06	7.37509e+06	High	High
High	Master Protein	Q9WTM5	RuvB-like 2 OS=Mus musculus OX=10090 GN=Ruvbl2 PE=1 SV=3	40	19	51.1	1.19608e+07	1.07602e+07	High	High
High	Master Protein	P83741	Serine/threonine-protein kinase WNK1 OS=Mus musculus OX=10090 GN=Wnk1 PE=1 SV=2	7	19	250.8	6.6581e+06	6.0711e+06	High	High
High	Master Protein	Q6P1F6	Serine/threonine-protein phosphatase 2A 55 kDa regulatory subunit B alpha isoform OS=Mus musculus OX=10090 GN=Ppp2r2a PE=1 SV=1	36	19	51.7	1.09656e+07	1.04842e+07	High	High
High	Master Protein	B2C3G8	Signal transducer and activator of transcription OS=Mus musculus OX=10090 GN=Stat5a PE=1 SV=1	20	19	91.6	912890	742860	High	High
High	Master Protein	Q64442	Sorbitol dehydrogenase OS=Mus musculus OX=10090 GN=Sord PE=1 SV=3	33	19	38.2	2.44441e+07	1.96657e+07	High	High
High	Master Protein	Q64674	Spermidine synthase OS=Mus musculus OX=10090 GN=Srm PE=1 SV=1	32	19	34	1.55497e+07	1.76173e+07	High	High
High	Master Protein	Q9CU62	Structural maintenance of chromosomes protein 1A OS=Mus musculus OX=10090 GN=Smc1a PE=1 SV=4	11	19	143.1	4.36794e+06	6.06941e+06	High	High
High	Master Protein	Q569Z6	Thyroid hormone receptor-associated protein 3 OS=Mus musculus OX=10090 GN=Thrap3 PE=1 SV=1	19	19	108.1	7.50134e+06	5.2742e+06	High	High
High	Master Protein	Q99P91	Transmembrane glycoprotein NMB OS=Mus musculus OX=10090 GN=Gpnmb PE=1 SV=2	17	19	63.6	8.88522e+07	8.87591e+07	High	High
High	Master Protein	P41241	Tyrosine-protein kinase CSK OS=Mus musculus OX=10090 GN=Csk PE=1 SV=2	28	19	50.7	1.40812e+07	1.48663e+07	High	High
High	Master Protein	P25911	Tyrosine-protein kinase Lyn OS=Mus musculus OX=10090 GN=Lyn PE=1 SV=4	28	19	58.8	1.87442e+07	1.74281e+07	High	High
High	Master Protein	P97797	Tyrosine-protein phosphatase non-receptor type substrate 1 OS=Mus musculus OX=10090 GN=Sirpa PE=1 SV=2	25	19	56.4	2.39635e+07	2.4468e+07	High	High
High	Master Protein	Q9CZY3	Ubiquitin-conjugating enzyme E2 variant 1 OS=Mus musculus OX=10090 GN=Ube2v1 PE=1 SV=1	62	19	16.3	4.5528e+07	3.99943e+07	High	High
High	Master Protein	Q9JK81	UPF0160 protein MYG1, mitochondrial OS=Mus musculus OX=10090 GN=Myg1 PE=1 SV=1	39	19	42.7	1.31634e+07	1.35196e+07	High	High
High	Master Protein	P62270	40S ribosomal protein S18 OS=Mus musculus OX=10090 GN=Rps18 PE=1 SV=3	47	18	17.7	2.6491e+07	2.2981e+07	High	High
High	Master Protein	Q9CQ60	6-phosphogluconolactonase OS=Mus musculus OX=10090 GN=Pgls PE=1 SV=1	48	18	27.2	3.3667e+07	3.08457e+07	High	High
High	Master Protein	P84084	ADP-ribosylation factor 5 OS=Mus musculus OX=10090 GN=Arf5 PE=1 SV=2	48	18	20.5	301020	260069	High	High
High	Master Protein	G5E895	Aldo-keto reductase family 1, member B10 (aldose reductase) OS=Mus musculus OX=10090 GN=Akr1b10 PE=1 SV=1	34	18	35.8	8.02948e+06	7.09287e+06	High	High
High	Master Protein	O54984	ATPase Asna1 OS=Mus musculus OX=10090 GN=Asna1 PE=1 SV=2	35	18	38.8	1.21269e+07	1.07799e+07	High	High
High	Master Protein	Q8C605	ATP-dependent 6-phosphofructokinase OS=Mus musculus OX=10090 GN=Pfkp PE=1 SV=1	16	18	85.5	7.07235e+06	5.47714e+06	High	High
High	Master Protein	O88456	Calpain small subunit 1 OS=Mus musculus OX=10090 GN=Capns1 PE=1 SV=1	38	18	28.4	1.49956e+07	1.49686e+07	High	High
High	Master Protein	Q61753	D-3-phosphoglycerate dehydrogenase OS=Mus musculus OX=10090 GN=Phgdh PE=1 SV=3	18	18	56.5	1.50586e+07	1.17387e+07	High	High
High	Master Protein	Q8C147	Dedicator of cytokinesis protein 8 OS=Mus musculus OX=10090 GN=Dock8 PE=1 SV=4	9	18	238.8	4.17406e+06	4.91444e+06	High	High
High	Master Protein	P97311	DNA replication licensing factor MCM6 OS=Mus musculus OX=10090 GN=Mcm6 PE=1 SV=1	22	18	92.8	5.71069e+06	5.66543e+06	High	High
High	Master Protein	P05063	Fructose-bisphosphate aldolase C OS=Mus musculus OX=10090 GN=Aldoc PE=1 SV=4	39	18	39.4	4.67791e+06	4.23803e+06	High	High
High	Master Protein	O09106	Histone deacetylase 1 OS=Mus musculus OX=10090 GN=Hdac1 PE=1 SV=1	27	18	55	9.52655e+06	9.14077e+06	High	High
High	Master Protein	Q8VD75	Huntingtin-interacting protein 1 OS=Mus musculus OX=10090 GN=Hip1 PE=1 SV=2	15	18	115.1	7.6269e+06	7.24468e+06	High	High
High	Master Protein	Q9QZ85	Interferon-inducible GTPase 1 OS=Mus musculus OX=10090 GN=Iigp1 PE=1 SV=2	37	18	47.5	5.80191e+06	6.20206e+06	High	High
High	Master Protein	P19973	Lymphocyte-specific protein 1 OS=Mus musculus OX=10090 GN=Lsp1 PE=1 SV=2	61	18	36.7	1.32224e+07	1.42007e+07	High	High
High	Master Protein	A0A1W2P6F6	Myosin light polypeptide 6 OS=Mus musculus OX=10090 GN=Myl6 PE=1 SV=1	63	18	17	6.00095e+07	5.54476e+07	High	High
High	Master Protein	B1AU76	Nuclear autoantigenic sperm protein OS=Mus musculus OX=10090 GN=Nasp PE=1 SV=1	29	18	48.7	1.17594e+07	1.20207e+07	High	High
High	Master Protein	Q8JZZ5	Phosphatidylinositol transfer protein beta isoform OS=Mus musculus OX=10090 GN=Pitpnb PE=1 SV=1	54	18	31.6	7.21756e+06	5.60618e+06	High	High
High	Master Protein	Q9JIF0	Protein arginine N-methyltransferase 1 OS=Mus musculus OX=10090 GN=Prmt1 PE=1 SV=1	33	18	42.4	7.93905e+06	7.40033e+06	High	High
High	Master Protein	Q7TNV0	Protein DEK OS=Mus musculus OX=10090 GN=Dek PE=1 SV=1	27	18	43.1	14694770	1.17208e+07	High	High
High	Master Protein	P61327	Protein mago nashi homolog OS=Mus musculus OX=10090 GN=Magoh PE=2 SV=1	81	18	17.2	1.38487e+07	1.73369e+07	High	High
High	Master Protein	Q61074	Protein phosphatase 1G OS=Mus musculus OX=10090 GN=Ppm1g PE=1 SV=3	23	18	58.7	8.75888e+06	8.35727e+06	High	High
High	Master Protein	O89086	RNA-binding protein 3 OS=Mus musculus OX=10090 GN=Rbm3 PE=1 SV=1	63	18	16.6	6.0388e+07	6.00003e+07	High	High
High	Master Protein	P70268	Serine/threonine-protein kinase N1 OS=Mus musculus OX=10090 GN=Pkn1 PE=1 SV=3	13	18	104.3	6.68739e+06	5.02819e+06	High	High
High	Master Protein	Q91V89	Serine/threonine-protein phosphatase 2A 56 kDa regulatory subunit OS=Mus musculus OX=10090 GN=Ppp2r5d PE=1 SV=1	25	18	69	6.255e+06	5.97649e+06	High	High
High	Master Protein	Q91VW3	SH3 domain-binding glutamic acid-rich-like protein 3 OS=Mus musculus OX=10090 GN=Sh3bgrl3 PE=1 SV=1	41	18	10.5	1.15538e+08	1.19066e+08	High	High
High	Master Protein	Q91Z67	SLIT-ROBO Rho GTPase-activating protein 2 OS=Mus musculus OX=10090 GN=Srgap2 PE=1 SV=2	13	18	120.7	2.75095e+06	2.79321e+06	High	High
High	Master Protein	Q8BH40	Syntaxin-7 OS=Mus musculus OX=10090 GN=Stx7 PE=1 SV=1	43	18	29.7	22184611	1.98483e+07	High	High
High	Master Protein	O08583	THO complex subunit 4 OS=Mus musculus OX=10090 GN=Alyref PE=1 SV=3	50	18	26.9	4.05508e+07	3.24531e+07	High	High
High	Master Protein	Q8CGF7	Transcription elongation regulator 1 OS=Mus musculus OX=10090 GN=Tcerg1 PE=1 SV=2	12	18	123.7	7.95004e+06	5.74876e+06	High	High
High	Master Protein	Q9QUI0	Transforming protein RhoA OS=Mus musculus OX=10090 GN=Rhoa PE=1 SV=1	52	18	21.8	2.1407e+07	1.95778e+07	High	High
High	Master Protein	Q62348	Translin OS=Mus musculus OX=10090 GN=Tsn PE=1 SV=1	53	18	26.2	1.87142e+07	2.0723e+07	High	High
High	Master Protein	Q3TIX9	U4/U6.U5 tri-snRNP-associated protein 2 OS=Mus musculus OX=10090 GN=Usp39 PE=1 SV=2	26	18	65.1	5.11207e+06	3.66653e+06	High	High
High	Master Protein	Q9DBK7	Ubiquitin-activating enzyme E1-like OS=Mus musculus OX=10090 GN=Uba7 PE=1 SV=1	22	18	108.6	8.46077e+06	6.64124e+06	High	High
High	Master Protein	P46467	Vacuolar protein sorting-associated protein 4B OS=Mus musculus OX=10090 GN=Vps4b PE=1 SV=2	30	18	49.4	1.02827e+07	7.66212e+06	High	High
High	Master Protein	Q8C2E7	WASH complex subunit 5 OS=Mus musculus OX=10090 GN=Washc5 PE=1 SV=2	13	18	134	5.11048e+06	4.36713e+06	High	High
High	Master Protein	G3UZ34	116 kDa U5 small nuclear ribonucleoprotein component OS=Mus musculus OX=10090 GN=Eftud2 PE=1 SV=1	19	17	108.3	7.90703e+06	6.85019e+06	High	High
High	Master Protein	Q3UHX2	28 kDa heat- and acid-stable phosphoprotein OS=Mus musculus OX=10090 GN=Pdap1 PE=1 SV=1	48	17	20.6	7.13202e+06	4.8459e+06	High	High
High	Master Protein	P63325	40S ribosomal protein S10 OS=Mus musculus OX=10090 GN=Rps10 PE=1 SV=1	50	17	18.9	3.21658e+07	2.76827e+07	High	High
High	Master Protein	P47911	60S ribosomal protein L6 OS=Mus musculus OX=10090 GN=Rpl6 PE=1 SV=3	27	17	33.5	1.12145e+07	9.54839e+06	High	High
High	Master Protein	Q64010	Adapter molecule crk OS=Mus musculus OX=10090 GN=Crk PE=1 SV=1	47	17	33.8	1.34913e+07	1.14308e+07	High	High
High	Master Protein	P03958	Adenosine deaminase OS=Mus musculus OX=10090 GN=Ada PE=1 SV=3	38	17	40	5.5395e+06	5227953	High	High
High	Master Protein	Q8R0H9	ADP-ribosylation factor-binding protein GGA1 OS=Mus musculus OX=10090 GN=Gga1 PE=1 SV=1	24	17	69.9	8.92897e+06	6.3003e+06	High	High
High	Master Protein	P56480	ATP synthase subunit beta, mitochondrial OS=Mus musculus OX=10090 GN=Atp5f1b PE=1 SV=2	31	17	56.3	6.66673e+06	4.92485e+06	High	High
High	Master Protein	P29452	Caspase-1 OS=Mus musculus OX=10090 GN=Casp1 PE=1 SV=1	28	17	45.6	1.15119e+07	9.278e+06	High	High
High	Master Protein	Q8K1J6	CCA tRNA nucleotidyltransferase 1, mitochondrial OS=Mus musculus OX=10090 GN=Trnt1 PE=1 SV=1	30	17	49.9	7.36872e+06	8.34767e+06	High	High
High	Master Protein	Q9CZU6	Citrate synthase, mitochondrial OS=Mus musculus OX=10090 GN=Cs PE=1 SV=1	29	17	51.7	1.13843e+07	1.07893e+07	High	High
High	Master Protein	Q99LD4	COP9 signalosome complex subunit 1 OS=Mus musculus OX=10090 GN=Gps1 PE=1 SV=1	27	17	53.4	1.06181e+07	1.04794e+07	High	High
High	Master Protein	P47941	Crk-like protein OS=Mus musculus OX=10090 GN=Crkl PE=1 SV=2	53	17	33.8	1.37729e+07	1.25999e+07	High	High
High	Master Protein	P00375	Dihydrofolate reductase OS=Mus musculus OX=10090 GN=Dhfr PE=1 SV=3	59	17	21.6	1.5677e+07	1.49537e+07	High	High
High	Master Protein	P13864	DNA (cytosine-5)-methyltransferase 1 OS=Mus musculus OX=10090 GN=Dnmt1 PE=1 SV=5	9	17	183.1	5.50766e+06	5.87909e+06	High	High
High	Master Protein	Q99L45	Eukaryotic translation initiation factor 2 subunit 2 OS=Mus musculus OX=10090 GN=Eif2s2 PE=1 SV=1	39	17	38.1	8286141	7.57904e+06	High	High
High	Master Protein	Q62448	Eukaryotic translation initiation factor 4 gamma 2 OS=Mus musculus OX=10090 GN=Eif4g2 PE=1 SV=2	12	17	102	6.6339e+06	6.03814e+06	High	High
High	Master Protein	P51855	Glutathione synthetase OS=Mus musculus OX=10090 GN=Gss PE=1 SV=1	33	17	52.2	1.30629e+07	1.49994e+07	High	High
High	Master Protein	Q9CPU0	Lactoylglutathione lyase OS=Mus musculus OX=10090 GN=Glo1 PE=1 SV=3	56	17	20.8	3.25059e+07	2.98855e+07	High	High
High	Master Protein	Q99KP3	Lambda-crystallin homolog OS=Mus musculus OX=10090 GN=Cryl1 PE=1 SV=3	36	17	35.2	1.12608e+07	1.07418e+07	High	High
High	Master Protein	A2A6J7	Lymphocyte-specific protein 1 OS=Mus musculus OX=10090 GN=Lsp1 PE=1 SV=1	61	17	35.9	106885	201300	Peak Found	High
High	Master Protein	P49138	MAP kinase-activated protein kinase 2 OS=Mus musculus OX=10090 GN=Mapkapk2 PE=1 SV=2	33	17	44	9.21139e+06	8.21148e+06	High	High
High	Master Protein	Q9R190	Metastasis-associated protein MTA2 OS=Mus musculus OX=10090 GN=Mta2 PE=1 SV=1	21	17	75	7.54322e+06	6.65552e+06	High	High
High	Master Protein	Q8CG29	Myosin-1F-like protein OS=Mus musculus OX=10090 GN=Myo1f PE=1 SV=1	15	17	125.1	6.67103e+06	5.77444e+06	High	High
High	Master Protein	Q8K4Z3	NAD(P)H-hydrate epimerase OS=Mus musculus OX=10090 GN=Naxe PE=1 SV=1	52	17	31	1.79084e+07	1.55025e+07	High	High
High	Master Protein	Q8BJ71	Nuclear pore complex protein Nup93 OS=Mus musculus OX=10090 GN=Nup93 PE=1 SV=1	17	17	93.2	4.159e+06	3.95881e+06	High	High
High	Master Protein	Q3B7Z2	Oxysterol-binding protein 1 OS=Mus musculus OX=10090 GN=Osbp PE=1 SV=3	19	17	88.7	1.0062e+07	9.1813e+06	High	High
High	Master Protein	Q69ZK0	Phosphatidylinositol 3,4,5-trisphosphate-dependent Rac exchanger 1 protein OS=Mus musculus OX=10090 GN=Prex1 PE=1 SV=2	9	17	184.8	5.28795e+06	4.47342e+06	High	High
High	Master Protein	P28798	Progranulin OS=Mus musculus OX=10090 GN=Grn PE=1 SV=2	16	17	63.4	7.35168e+07	8.89598e+07	High	High
High	Master Protein	Q3TML0	Protein disulfide-isomerase A6 OS=Mus musculus OX=10090 GN=Pdia6 PE=1 SV=1	27	17	48.7	8.03984e+06	9.02424e+06	High	High
High	Master Protein	Q8BHZ0	Protein FAM49A OS=Mus musculus OX=10090 GN=Fam49a PE=1 SV=1	20	17	37.3	650019	600894	High	High
High	Master Protein	P26350	Prothymosin alpha OS=Mus musculus OX=10090 GN=Ptma PE=1 SV=2	40	17	12.2	1.31593e+07	2.14171e+07	High	High
High	Master Protein	Q3TLP8	Ras-related C3 botulinum toxin substrate 1 OS=Mus musculus OX=10090 GN=Rac1 PE=1 SV=1	28	17	23.4	5.08268e+07	3.30661e+07	High	High
High	Master Protein	Q9CWZ3	RNA-binding protein 8A OS=Mus musculus OX=10090 GN=Rbm8a PE=1 SV=4	61	17	19.9	1.28188e+07	1.05459e+07	High	High
High	Master Protein	Q3THS6	S-adenosylmethionine synthase isoform type-2 OS=Mus musculus OX=10090 GN=Mat2a PE=1 SV=2	23	17	43.7	1.05097e+07	9.501e+06	High	High
High	Master Protein	Q80UG5	Septin-9 OS=Mus musculus OX=10090 GN=Septin9 PE=1 SV=1	18	17	65.5	1.47371e+07	1.12668e+07	High	High
High	Master Protein	P27048	Small nuclear ribonucleoprotein-associated protein B OS=Mus musculus OX=10090 GN=Snrpb PE=1 SV=1	19	17	23.6	3.39298e+07	2.91129e+07	High	High
High	Master Protein	O54988	STE20-like serine/threonine-protein kinase OS=Mus musculus OX=10090 GN=Slk PE=1 SV=2	12	17	141.4	1.81141e+06	1.45712e+06	High	High
High	Master Protein	Q8BND5	Sulfhydryl oxidase 1 OS=Mus musculus OX=10090 GN=Qsox1 PE=1 SV=1	16	17	82.7	8.2111e+06	9.27673e+06	High	High
High	Master Protein	Q99J36	THUMP domain-containing protein 1 OS=Mus musculus OX=10090 GN=Thumpd1 PE=1 SV=1	39	17	38.9	1.14719e+07	9.48036e+06	High	High
High	Master Protein	Q9CQI7	U2 small nuclear ribonucleoprotein B'' OS=Mus musculus OX=10090 GN=Snrpb2 PE=1 SV=1	44	17	25.3	5.85821e+06	5.48732e+06	High	High
High	Master Protein	P61089	Ubiquitin-conjugating enzyme E2 N OS=Mus musculus OX=10090 GN=Ube2n PE=1 SV=1	68	17	17.1	7.46679e+07	7.65249e+07	High	High
High	Master Protein	S4R1X1	WD repeat-containing protein 91 OS=Mus musculus OX=10090 GN=Wdr91 PE=1 SV=1	23	17	67.7	5.74653e+06	4.87734e+06	High	High
High	Master Protein	Q3UE92	Xaa-Pro aminopeptidase 1 OS=Mus musculus OX=10090 GN=Xpnpep1 PE=1 SV=1	21	17	74.5	8.86825e+06	7.8738e+06	High	High
High	Master Protein	Q921R2	40S ribosomal protein S13 OS=Mus musculus OX=10090 GN=Rps13 PE=1 SV=1	52	16	16.1	1.49567e+07	1.35988e+07	High	High
High	Master Protein	P14131	40S ribosomal protein S16 OS=Mus musculus OX=10090 GN=Rps16 PE=1 SV=4	55	16	16.4	3.09875e+07	2.62631e+07	High	High
High	Master Protein	P63038	60 kDa heat shock protein, mitochondrial OS=Mus musculus OX=10090 GN=Hspd1 PE=1 SV=1	25	16	60.9	7.69521e+06	6.14962e+06	High	High
High	Master Protein	P28474	Alcohol dehydrogenase class-3 OS=Mus musculus OX=10090 GN=Adh5 PE=1 SV=3	39	16	39.5	1.7881e+07	1.66446e+07	High	High
High	Master Protein	Q8VC28	Aldo-keto reductase family 1 member C13 OS=Mus musculus OX=10090 GN=Akr1c13 PE=1 SV=2	28	16	37	8.36088e+06	6.93198e+06	High	High
High	Master Protein	O70200	Allograft inflammatory factor 1 OS=Mus musculus OX=10090 GN=Aif1 PE=1 SV=1	37	16	16.9	4.41085e+07	4.45732e+07	High	High
High	Master Protein	Q61024	Asparagine synthetase [glutamine-hydrolyzing] OS=Mus musculus OX=10090 GN=Asns PE=1 SV=3	21	16	64.2	1.01199e+07	9.94507e+06	High	High
High	Master Protein	A0A494B923	Bifunctional 3'-phosphoadenosine 5'-phosphosulfate synthase 2 OS=Mus musculus OX=10090 GN=Papss2 PE=1 SV=1	22	16	69.4	5.79211e+06	4.29079e+06	High	High
High	Master Protein	E9Q1W0	Calcium/calmodulin-dependent protein kinase type II subunit delta OS=Mus musculus OX=10090 GN=Camk2d PE=1 SV=2	21	16	57.7	7.11657e+06	6.9631e+06	High	High
High	Master Protein	P00920	Carbonic anhydrase 2 OS=Mus musculus OX=10090 GN=Ca2 PE=1 SV=4	56	16	29	1.42801e+07	1.54338e+07	High	High
High	Master Protein	O89110	Caspase-8 OS=Mus musculus OX=10090 GN=Casp8 PE=1 SV=1	25	16	55.3	9.98116e+06	9.66607e+06	High	High
High	Master Protein	Q9WUU7	Cathepsin Z OS=Mus musculus OX=10090 GN=Ctsz PE=1 SV=1	26	16	34	5.19085e+07	5.64851e+07	High	High
High	Master Protein	Q9QWK4	CD5 antigen-like OS=Mus musculus OX=10090 GN=Cd5l PE=1 SV=3	28	16	38.8	2.7128e+07	2.97606e+07	High	High
High	Master Protein	O35864	COP9 signalosome complex subunit 5 OS=Mus musculus OX=10090 GN=Cops5 PE=1 SV=3	33	16	37.5	1.03159e+07	8.39528e+06	High	High
High	Master Protein	P62897	Cytochrome c, somatic OS=Mus musculus OX=10090 GN=Cycs PE=1 SV=2	55	16	11.6	8.52216e+07	7.35637e+07	High	High
High	Master Protein	Q8BX80	Cytosolic endo-beta-N-acetylglucosaminidase OS=Mus musculus OX=10090 GN=Engase PE=1 SV=1	20	16	82.9	3.61368e+06	3.40187e+06	High	High
High	Master Protein	Q8BVI4	Dihydropteridine reductase OS=Mus musculus OX=10090 GN=Qdpr PE=1 SV=2	44	16	25.6	1.4285e+07	1.31562e+07	High	High
High	Master Protein	P70372	ELAV-like protein 1 OS=Mus musculus OX=10090 GN=Elavl1 PE=1 SV=2	34	16	36.1	1.26077e+07	1.45451e+07	High	High
High	Master Protein	A0A494BB95	Eukaryotic translation initiation factor 1A OS=Mus musculus OX=10090 GN=Eif1a PE=1 SV=1	39	16	28.6	8.82898e+06	9.81543e+06	High	High
High	Master Protein	Q9Z1D1	Eukaryotic translation initiation factor 3 subunit G OS=Mus musculus OX=10090 GN=Eif3g PE=1 SV=2	34	16	35.6	1.28605e+07	1.36707e+07	High	High
High	Master Protein	P04117	Fatty acid-binding protein, adipocyte OS=Mus musculus OX=10090 GN=Fabp4 PE=1 SV=3	43	16	14.6	1.97451e+07	1.77239e+07	High	High
High	Master Protein	Q91Z50	Flap endonuclease 1 OS=Mus musculus OX=10090 GN=Fen1 PE=1 SV=1	22	16	42.6	1.042e+07	1.06522e+07	High	High
High	Master Protein	Q9ERL7	Glia maturation factor gamma OS=Mus musculus OX=10090 GN=Gmfg PE=1 SV=1	49	16	16.7	2.73959e+07	2.37052e+07	High	High
High	Master Protein	Q9ESX5	H/ACA ribonucleoprotein complex subunit DKC1 OS=Mus musculus OX=10090 GN=Dkc1 PE=1 SV=4	30	16	57.4	4.23011e+06	3.90804e+06	High	High
High	Master Protein	P01901	H-2 class I histocompatibility antigen, K-B alpha chain OS=Mus musculus OX=10090 GN=H2-K1 PE=1 SV=1	31	16	41.3	7.25803e+06	6.81949e+06	High	High
High	Master Protein	Q3TC93	HCLS1-binding protein 3 OS=Mus musculus OX=10090 GN=Hs1bp3 PE=1 SV=2	26	16	43.7	5.44626e+06	6.85249e+06	High	High
High	Master Protein	Q8C2Q7	Heterogeneous nuclear ribonucleoprotein H OS=Mus musculus OX=10090 GN=Hnrnph1 PE=1 SV=1	31	16	51.2	1.13496e+07	9.3381e+06	High	High
High	Master Protein	P43275	Histone H1.1 OS=Mus musculus OX=10090 GN=H1-1 PE=1 SV=2	30	16	21.8	1.40203e+07	1.16906e+07	High	High
High	Master Protein	Q9D819	Inorganic pyrophosphatase OS=Mus musculus OX=10090 GN=Ppa1 PE=1 SV=1	45	16	32.6	14100532	1.38104e+07	High	High
High	Master Protein	Q924B0	Inositol-1-monophosphatase OS=Mus musculus OX=10090 GN=Impa1 PE=1 SV=1	36	16	30.4	2.58174e+07	2.36317e+07	High	High
High	Master Protein	P54071	Isocitrate dehydrogenase [NADP], mitochondrial OS=Mus musculus OX=10090 GN=Idh2 PE=1 SV=3	26	16	50.9	4.22453e+06	3.39556e+06	High	High
High	Master Protein	Q505F5	Leucine-rich repeat-containing protein 47 OS=Mus musculus OX=10090 GN=Lrrc47 PE=1 SV=1	24	16	63.6	8.97717e+06	8.11906e+06	High	High
High	Master Protein	O88188	Lymphocyte antigen 86 OS=Mus musculus OX=10090 GN=Ly86 PE=1 SV=1	45	16	17.8	3.17615e+07	3.78748e+07	High	High
High	Master Protein	E9QB02	Methionine--tRNA ligase, cytoplasmic OS=Mus musculus OX=10090 GN=Mars PE=1 SV=1	15	16	102.3	6.24591e+06	5.58927e+06	High	High
High	Master Protein	P58058	NAD kinase OS=Mus musculus OX=10090 GN=Nadk PE=1 SV=2	26	16	48.6	9.1866e+06	8.67581e+06	High	High
High	Master Protein	O70138	Neutrophil collagenase OS=Mus musculus OX=10090 GN=Mmp8 PE=2 SV=2	21	16	53.1	1.07802e+07	1.09318e+07	High	High
High	Master Protein	Q8CI95	Oxysterol-binding protein-related protein 11 OS=Mus musculus OX=10090 GN=Osbpl11 PE=1 SV=2	19	16	83.6	7.28202e+06	5.48806e+06	High	High
High	Master Protein	P70195	Proteasome subunit beta type-7 OS=Mus musculus OX=10090 GN=Psmb7 PE=1 SV=1	34	16	29.9	3.51393e+07	33406158	High	High
High	Master Protein	A0A0A0MQ79	Protein PRRC2C OS=Mus musculus OX=10090 GN=Prrc2c PE=1 SV=1	5	16	310.5	2.24793e+06	1.9852e+06	High	High
High	Master Protein	D3YXK2	Scaffold attachment factor B1 OS=Mus musculus OX=10090 GN=Safb PE=1 SV=2	14	16	105	5.52732e+06	5.6007e+06	High	High
High	Master Protein	Q60676	Serine/threonine-protein phosphatase 5 OS=Mus musculus OX=10090 GN=Ppp5c PE=1 SV=3	28	16	56.8	7.80263e+06	7.64347e+06	High	High
High	Master Protein	G3X8X6	Sialoadhesin OS=Mus musculus OX=10090 GN=Siglec1 PE=1 SV=1	7	16	183.5	2.0925e+06	2.19506e+06	High	High
High	Master Protein	Q3UHD6	Sorting nexin-27 OS=Mus musculus OX=10090 GN=Snx27 PE=1 SV=2	24	16	61	2.55532e+07	1.99964e+07	High	High
High	Master Protein	P26369	Splicing factor U2AF 65 kDa subunit OS=Mus musculus OX=10090 GN=U2af2 PE=1 SV=3	33	16	53.5	1.81467e+07	1.63192e+07	High	High
High	Master Protein	Q9CW03	Structural maintenance of chromosomes protein 3 OS=Mus musculus OX=10090 GN=Smc3 PE=1 SV=2	10	16	141.5	2.73977e+06	2.71919e+06	High	High
High	Master Protein	Q9D0K2	Succinyl-CoA:3-ketoacid coenzyme A transferase 1, mitochondrial OS=Mus musculus OX=10090 GN=Oxct1 PE=1 SV=1	26	16	56	6.60444e+06	6537831	High	High
High	Master Protein	P10639	Thioredoxin OS=Mus musculus OX=10090 GN=Txn PE=1 SV=3	49	16	11.7	1.61762e+08	1.31482e+08	High	High
High	Master Protein	Q9QZE7	Translin-associated protein X OS=Mus musculus OX=10090 GN=Tsnax PE=1 SV=1	51	16	32.9	1.326e+07	9.81278e+06	High	High
High	Master Protein	Q61333	Tumor necrosis factor alpha-induced protein 2 OS=Mus musculus OX=10090 GN=Tnfaip2 PE=1 SV=2	21	16	78.1	6.37509e+06	5.23846e+06	High	High
High	Master Protein	P35235	Tyrosine-protein phosphatase non-receptor type 11 OS=Mus musculus OX=10090 GN=Ptpn11 PE=1 SV=3	26	16	68	1.45104e+07	1.34361e+07	High	High
High	Master Protein	Q62376	U1 small nuclear ribonucleoprotein 70 kDa OS=Mus musculus OX=10090 GN=Snrnp70 PE=1 SV=2	25	16	52	1.03019e+07	9.31216e+06	High	High
High	Master Protein	Q62189	U1 small nuclear ribonucleoprotein A OS=Mus musculus OX=10090 GN=Snrpa PE=1 SV=3	36	16	31.8	1.5044e+07	1.41599e+07	High	High
High	Master Protein	Q8R317	Ubiquilin-1 OS=Mus musculus OX=10090 GN=Ubqln1 PE=1 SV=1	24	16	61.9	7.27343e+06	6.76436e+06	High	High
High	Master Protein	Q80U87	Ubiquitin carboxyl-terminal hydrolase 8 OS=Mus musculus OX=10090 GN=Usp8 PE=1 SV=2	12	16	122.5	5.70835e+06	6.03913e+06	High	High
High	Master Protein	P68037	Ubiquitin-conjugating enzyme E2 L3 OS=Mus musculus OX=10090 GN=Ube2l3 PE=1 SV=1	58	16	17.9	8.43818e+07	7.68825e+07	High	High
High	Master Protein	Q9D2M8	Ubiquitin-conjugating enzyme E2 variant 2 OS=Mus musculus OX=10090 GN=Ube2v2 PE=1 SV=4	56	16	16.4	1.31315e+06	1.12796e+06	High	High
High	Master Protein	Q922Y1	UBX domain-containing protein 1 OS=Mus musculus OX=10090 GN=Ubxn1 PE=1 SV=1	42	16	33.6	5.46259e+06	5.02331e+06	High	High
High	Master Protein	P57746	V-type proton ATPase subunit D OS=Mus musculus OX=10090 GN=Atp6v1d PE=1 SV=1	44	16	28.4	1.1664e+07	1.03337e+07	High	High
High	Master Protein	Q8K1I7	WAS/WASL-interacting protein family member 1 OS=Mus musculus OX=10090 GN=Wipf1 PE=1 SV=1	44	16	50.1	1.57903e+07	1.62064e+07	High	High
High	Master Protein	O35593	26S proteasome non-ATPase regulatory subunit 14 OS=Mus musculus OX=10090 GN=Psmd14 PE=1 SV=2	56	15	34.6	1.96106e+07	16842190	High	High
High	Master Protein	Q9Z0S1	3'(2'),5'-bisphosphate nucleotidase 1 OS=Mus musculus OX=10090 GN=Bpnt1 PE=1 SV=2	34	15	33.2	1.24808e+07	1.2962e+07	High	High
High	Master Protein	Q9CQR2	40S ribosomal protein S21 OS=Mus musculus OX=10090 GN=Rps21 PE=1 SV=1	59	15	9.1	1.00478e+07	8.72511e+06	High	High
High	Master Protein	P47962	60S ribosomal protein L5 OS=Mus musculus OX=10090 GN=Rpl5 PE=1 SV=3	27	15	34.4	1.42285e+07	1.15202e+07	High	High
High	Master Protein	P08030	Adenine phosphoribosyltransferase OS=Mus musculus OX=10090 GN=Aprt PE=1 SV=2	44	15	19.7	3.17812e+07	2.88474e+07	High	High
High	Master Protein	Q9DBF1	Alpha-aminoadipic semialdehyde dehydrogenase OS=Mus musculus OX=10090 GN=Aldh7a1 PE=1 SV=4	23	15	58.8	4.46567e+06	4.02107e+06	High	High
High	Master Protein	A0A0U1RQ20	Apoptosis-associated speck-like protein-containing a CARD (Fragment) OS=Mus musculus OX=10090 GN=Pycard PE=1 SV=1	81	15	16.7	260445		High	Not Found
High	Master Protein	A0A0U1RPL0	Ataxin-2-like protein OS=Mus musculus OX=10090 GN=Atxn2l PE=1 SV=1	12	15	115.2	3.88725e+06	4.69019e+06	High	High
High	Master Protein	Q9DCC5	Cbx3 protein OS=Mus musculus OX=10090 GN=Cbx3 PE=1 SV=1	36	15	20.8	1.70442e+07	1.45201e+07	High	High
High	Master Protein	P49586	Choline-phosphate cytidylyltransferase A OS=Mus musculus OX=10090 GN=Pcyt1a PE=1 SV=1	33	15	41.6	7.24001e+06	6.53862e+06	High	High
High	Master Protein	Q6NVF9	Cleavage and polyadenylation specificity factor subunit 6 OS=Mus musculus OX=10090 GN=Cpsf6 PE=1 SV=1	19	15	59.1	9.56948e+06	8.3553e+06	High	High
High	Master Protein	A2AGT5	Cytoskeleton-associated protein 5 OS=Mus musculus OX=10090 GN=Ckap5 PE=1 SV=1	7	15	225.5	1.83723e+06	1.70983e+06	High	High
High	Master Protein	Q91YP3	Deoxyribose-phosphate aldolase OS=Mus musculus OX=10090 GN=Dera PE=1 SV=1	37	15	35	6.75619e+06	6.38343e+06	High	High
High	Master Protein	Q6NZB0	DnaJ homolog subfamily C member 8 OS=Mus musculus OX=10090 GN=Dnajc8 PE=1 SV=2	31	15	29.8	1.62409e+07	1.35913e+07	High	High
High	Master Protein	E9QK48	Echinoderm microtubule-associated protein-like 2 OS=Mus musculus OX=10090 GN=Eml2 PE=1 SV=1	17	15	90.7	8.33454e+06	5.79046e+06	High	High
High	Master Protein	P11404	Fatty acid-binding protein, heart OS=Mus musculus OX=10090 GN=Fabp3 PE=1 SV=5	55	15	14.8	1.13127e+07	1.06911e+07	High	High
High	Master Protein	Q9R0N0	Galactokinase OS=Mus musculus OX=10090 GN=Galk1 PE=1 SV=2	29	15	42.3	6.54671e+06	6.37518e+06	High	High
High	Master Protein	P26443	Glutamate dehydrogenase 1, mitochondrial OS=Mus musculus OX=10090 GN=Glud1 PE=1 SV=1	17	15	61.3	7.63336e+06	7.23634e+06	High	High
High	Master Protein	O09172	Glutamate--cysteine ligase regulatory subunit OS=Mus musculus OX=10090 GN=Gclm PE=1 SV=1	42	15	30.5	3.82165e+07	2.78177e+07	High	High
High	Master Protein	P47856	Glutamine--fructose-6-phosphate aminotransferase [isomerizing] 1 OS=Mus musculus OX=10090 GN=Gfpt1 PE=1 SV=3	19	15	78.5	4.79608e+06	4.4599e+06	High	High
High	Master Protein	P63094	Guanine nucleotide-binding protein G(s) subunit alpha isoforms short OS=Mus musculus OX=10090 GN=Gnas PE=1 SV=1	30	15	45.6	6.40786e+06	5.58659e+06	High	High
High	Master Protein	Q921F4	Heterogeneous nuclear ribonucleoprotein L-like OS=Mus musculus OX=10090 GN=Hnrnpll PE=1 SV=3	24	15	64.1	5.18936e+06	5.64987e+06	High	High
High	Master Protein	O08528	Hexokinase-2 OS=Mus musculus OX=10090 GN=Hk2 PE=1 SV=1	11	15	102.5	1.80641e+06	1.30959e+06	High	High
High	Master Protein	P17095	High mobility group protein HMG-I/HMG-Y OS=Mus musculus OX=10090 GN=Hmga1 PE=1 SV=4	56	15	11.6	2.44643e+07	2.53751e+07	High	High
High	Master Protein	A0A0R4J008	Histone deacetylase 2 OS=Mus musculus OX=10090 GN=Hdac2 PE=1 SV=1	16	15	55.3	710136	936028	High	High
High	Master Protein	Q91V64	Isochorismatase domain-containing protein 1 OS=Mus musculus OX=10090 GN=Isoc1 PE=1 SV=1	38	15	32	1.33359e+07	1.22848e+07	High	High
High	Master Protein	Q8C129	Leucyl-cystinyl aminopeptidase OS=Mus musculus OX=10090 GN=Lnpep PE=1 SV=1	13	15	117.2	6.74633e+06	6.09399e+06	High	High
High	Master Protein	Q14CH1	Molybdenum cofactor sulfurase OS=Mus musculus OX=10090 GN=Mocos PE=1 SV=1	17	15	95	5.58836e+06	4.77202e+06	High	High
High	Master Protein	A0A0A6YW80	N-alpha-acetyltransferase 15, NatA auxiliary subunit OS=Mus musculus OX=10090 GN=Naa15 PE=1 SV=1	18	15	95.2	4.719e+06	4.38891e+06	High	High
High	Master Protein	Q8BZZ3	NEDD4-like E3 ubiquitin-protein ligase WWP1 OS=Mus musculus OX=10090 GN=Wwp1 PE=1 SV=2	11	15	104.6	1.91415e+06	1.68525e+06	High	High
High	Master Protein	P32020	Non-specific lipid-transfer protein OS=Mus musculus OX=10090 GN=Scp2 PE=1 SV=3	11	15	59.1	2.56083e+07	1.8282e+07	High	High
High	Master Protein	Q9Z2M7	Phosphomannomutase 2 OS=Mus musculus OX=10090 GN=Pmm2 PE=1 SV=1	31	15	27.6	9.13736e+06	8.25107e+06	High	High
High	Master Protein	Q61206	Platelet-activating factor acetylhydrolase IB subunit beta OS=Mus musculus OX=10090 GN=Pafah1b2 PE=1 SV=2	52	15	25.6	1.40689e+07	1.30042e+07	High	High
High	Master Protein	A2ALV7	Proteasome adapter and scaffold protein ECM29 (Fragment) OS=Mus musculus OX=10090 GN=Ecpas PE=1 SV=1	13	15	164.4	4.04391e+06	3.52381e+06	High	High
High	Master Protein	Q62433	Protein NDRG1 OS=Mus musculus OX=10090 GN=Ndrg1 PE=1 SV=1	34	15	43	6.88573e+06	5.49934e+06	High	High
High	Master Protein	P14069	Protein S100-A6 OS=Mus musculus OX=10090 GN=S100a6 PE=1 SV=3	73	15	10	3.3683e+07	3.77528e+07	High	High
High	Master Protein	A2BE93	Protein SET (Fragment) OS=Mus musculus OX=10090 GN=Set PE=1 SV=1	52	15	24.9	5.90543e+07	5.9027e+07	High	High
High	Master Protein	Q91YX0	Protein THEMIS2 OS=Mus musculus OX=10090 GN=Themis2 PE=1 SV=2	22	15	74.3	5.77029e+06	6.23057e+06	High	High
High	Master Protein	G3X8U3	Queuosine salvage protein OS=Mus musculus OX=10090 GN=2210016F16Rik PE=1 SV=1	41	15	38.6	6.79168e+06	7.55933e+06	High	High
High	Master Protein	A0A0N4SW73	Rab11 family-interacting protein 5 OS=Mus musculus OX=10090 GN=Rab11fip5 PE=1 SV=1	11	15	139.5	5.08067e+06	4.00651e+06	High	High
High	Master Protein	Q80ZX0	Sec24-related gene family, member B (S. cerevisiae) OS=Mus musculus OX=10090 GN=Sec24b PE=1 SV=1	10	15	135.5	6.2683e+06	5.64258e+06	High	High
High	Master Protein	Q62093	Serine/arginine-rich splicing factor 2 OS=Mus musculus OX=10090 GN=Srsf2 PE=1 SV=4	27	15	25.5	1.89331e+07	1.8388e+07	High	High
High	Master Protein	Q99KH8	Serine/threonine-protein kinase 24 OS=Mus musculus OX=10090 GN=Stk24 PE=1 SV=1	27	15	47.9	1.0305e+07	9.34028e+06	High	High
High	Master Protein	Q9JI11	Serine/threonine-protein kinase 4 OS=Mus musculus OX=10090 GN=Stk4 PE=1 SV=1	26	15	55.5	6.03311e+06	5.33688e+06	High	High
High	Master Protein	Q99MR6	Serrate RNA effector molecule homolog OS=Mus musculus OX=10090 GN=Srrt PE=1 SV=1	14	15	100.4	7.06113e+06	4.31281e+06	High	High
High	Master Protein	P42227	Signal transducer and activator of transcription 3 OS=Mus musculus OX=10090 GN=Stat3 PE=1 SV=2	16	15	88	5.74795e+06	5.309e+06	High	High
High	Master Protein	Q91VH2	Sorting nexin-9 OS=Mus musculus OX=10090 GN=Snx9 PE=1 SV=1	28	15	66.5	7.95785e+06	7.16816e+06	High	High
High	Master Protein	Q8R3D1	TBC1 domain family member 13 OS=Mus musculus OX=10090 GN=Tbc1d13 PE=1 SV=1	22	15	46.4	6.25823e+06	5.28701e+06	High	High
High	Master Protein	Q3T9E4	T-cell-specific guanine nucleotide triphosphate-binding protein 2 OS=Mus musculus OX=10090 GN=Tgtp2 PE=1 SV=2	35	15	47.1	7.02458e+06	9.1174e+06	High	High
High	Master Protein	P32921	Tryptophan--tRNA ligase, cytoplasmic OS=Mus musculus OX=10090 GN=Wars PE=1 SV=2	22	15	54.3	8.61664e+06	7.41382e+06	High	High
High	Master Protein	Q6PB44	Tyrosine-protein phosphatase non-receptor type 23 OS=Mus musculus OX=10090 GN=Ptpn23 PE=1 SV=2	10	15	185.1	5.01487e+06	4.13083e+06	High	High
High	Master Protein	Q8R5H1	Ubiquitin carboxyl-terminal hydrolase 15 OS=Mus musculus OX=10090 GN=Usp15 PE=1 SV=1	13	15	112.3	3.44626e+06	3.47331e+06	High	High
High	Master Protein	Q9WV55	Vesicle-associated membrane protein-associated protein A OS=Mus musculus OX=10090 GN=Vapa PE=1 SV=2	38	15	27.8	1.98921e+07	2.00345e+07	High	High
High	Master Protein	Q08761	Vitamin K-dependent protein S OS=Mus musculus OX=10090 GN=Pros1 PE=2 SV=1	11	15	74.9	9.97999e+06	1.1021e+07	High	High
High	Master Protein	A0A494BB75	WD repeat-containing protein 26 OS=Mus musculus OX=10090 GN=Wdr26 PE=1 SV=1	18	15	78.5	6.05658e+06	5.71798e+06	High	High
High	Master Protein	P51432	1-phosphatidylinositol 4,5-bisphosphate phosphodiesterase beta-3 OS=Mus musculus OX=10090 GN=Plcb3 PE=1 SV=2	13	14	139.4	2.41155e+06	2.22837e+06	High	High
High	Master Protein	Q9CX56	26S proteasome non-ATPase regulatory subunit 8 OS=Mus musculus OX=10090 GN=Psmd8 PE=1 SV=2	27	14	39.9	1.85406e+07	1.60863e+07	High	High
High	Master Protein	P99027	60S acidic ribosomal protein P2 OS=Mus musculus OX=10090 GN=Rplp2 PE=1 SV=3	81	14	11.6	2.51984e+07	2.63958e+07	High	High
High	Master Protein	Q9D8E6	60S ribosomal protein L4 OS=Mus musculus OX=10090 GN=Rpl4 PE=1 SV=3	24	14	47.1	8.62329e+06	7.13424e+06	High	High
High	Master Protein	Q9D1J1	Adaptin ear-binding coat-associated protein 2 OS=Mus musculus OX=10090 GN=Necap2 PE=1 SV=1	24	14	28.6	1.3547e+07	11654861	High	High
High	Master Protein	P61750	ADP-ribosylation factor 4 OS=Mus musculus OX=10090 GN=Arf4 PE=1 SV=2	44	14	20.4	3.00433e+06	2.20262e+06	High	High
High	Master Protein	A0A1L1SRX2	AMP deaminase OS=Mus musculus OX=10090 GN=Ampd3 PE=1 SV=1	15	14	89.5	4.5921e+06	4.44403e+06	High	High
High	Master Protein	Q07813	Apoptosis regulator BAX OS=Mus musculus OX=10090 GN=Bax PE=1 SV=1	59	14	21.4	9.6608e+06	9.43507e+06	High	High
High	Master Protein	A0A338P6P6	Arf-GAP with coiled-coil, ANK repeat and PH domain-containing protein 2 OS=Mus musculus OX=10090 GN=Acap2 PE=1 SV=1	13	14	91.1	2.98611e+06	2.67807e+06	High	High
High	Master Protein	Q91VR5	ATP-dependent RNA helicase DDX1 OS=Mus musculus OX=10090 GN=Ddx1 PE=1 SV=1	14	14	82.4	3.87185e+06	3.52348e+06	High	High
High	Master Protein	O09010	Beta-1,3-N-acetylglucosaminyltransferase lunatic fringe OS=Mus musculus OX=10090 GN=Lfng PE=1 SV=1	41	14	41.9	4.47467e+06	5.94591e+06	High	High
High	Master Protein	P15535	Beta-1,4-galactosyltransferase 1 OS=Mus musculus OX=10090 GN=B4galt1 PE=1 SV=1	23	14	44.4	1.39374e+07	1.44505e+07	High	High
High	Master Protein	Q8R5C5	Beta-centractin OS=Mus musculus OX=10090 GN=Actr1b PE=1 SV=1	28	14	42.3	738731		High	High
High	Master Protein	P70677	Caspase-3 OS=Mus musculus OX=10090 GN=Casp3 PE=1 SV=1	27	14	31.5	1.11812e+07	1.10635e+07	High	High
High	Master Protein	P83917	Chromobox protein homolog 1 OS=Mus musculus OX=10090 GN=Cbx1 PE=1 SV=1	38	14	21.4	5.2531e+06	5.08504e+06	High	High
High	Master Protein	Q58A65	C-Jun-amino-terminal kinase-interacting protein 4 OS=Mus musculus OX=10090 GN=Spag9 PE=1 SV=2	11	14	146.1	2.67109e+06	3.54404e+06	High	High
High	Master Protein	O35638	Cohesin subunit SA-2 OS=Mus musculus OX=10090 GN=Stag2 PE=1 SV=3	8	14	141.2	5.59723e+06	5.13182e+06	High	High
High	Master Protein	O88543	COP9 signalosome complex subunit 3 OS=Mus musculus OX=10090 GN=Cops3 PE=1 SV=3	24	14	47.8	1.04942e+07	1.04131e+07	High	High
High	Master Protein	P70303	CTP synthase 2 OS=Mus musculus OX=10090 GN=Ctps2 PE=1 SV=1	21	14	65.5	5.39227e+06	2.18642e+07	High	High
High	Master Protein	Q9JLV5	Cullin-3 OS=Mus musculus OX=10090 GN=Cul3 PE=1 SV=1	17	14	88.9	4.37699e+06	2.96089e+06	High	High
High	Master Protein	Q8R0Y6	Cytosolic 10-formyltetrahydrofolate dehydrogenase OS=Mus musculus OX=10090 GN=Aldh1l1 PE=1 SV=1	14	14	98.6	5.49248e+06	5.2151e+06	High	High
High	Master Protein	Q9D020	Cytosolic 5'-nucleotidase 3A OS=Mus musculus OX=10090 GN=Nt5c3a PE=1 SV=4	44	14	37.2	6.92964e+06	8.7723e+06	High	High
High	Master Protein	Q08943	FACT complex subunit SSRP1 OS=Mus musculus OX=10090 GN=Ssrp1 PE=1 SV=2	15	14	80.8	9.87648e+06	8.13628e+06	High	High
High	Master Protein	Q9D8T2	Gasdermin-D OS=Mus musculus OX=10090 GN=Gsdmdc1 PE=1 SV=1	21	14	53.2	1.17968e+07	9.725e+06	High	High
High	Master Protein	Q3THK7	GMP synthase [glutamine-hydrolyzing] OS=Mus musculus OX=10090 GN=Gmps PE=1 SV=2	21	14	76.7	4.26252e+06	3.37455e+06	High	High
High	Master Protein	Q8VDV3	Guanine nucleotide exchange factor for Rab-3A OS=Mus musculus OX=10090 GN=Rab3il1 PE=1 SV=1	36	14	42.7	5.29335e+06	4.18339e+06	High	High
High	Master Protein	Q8VHM5	Heterogeneous nuclear ribonucleoprotein R OS=Mus musculus OX=10090 GN=Hnrnpr PE=1 SV=1	24	14	70.8	3.64153e+06	3.12175e+06	High	High
High	Master Protein	E9Q1P8	Interferon regulatory factor 2-binding protein 2 OS=Mus musculus OX=10090 GN=Irf2bp2 PE=1 SV=1	24	14	59.3	1.33483e+06	1.28421e+06	High	High
High	Master Protein	Q9ERG0	LIM domain and actin-binding protein 1 OS=Mus musculus OX=10090 GN=Lima1 PE=1 SV=3	13	14	84	4.01131e+06	3.28647e+06	High	High
High	Master Protein	B1AU74	Motile sperm domain-containing protein 2 OS=Mus musculus OX=10090 GN=Mospd2 PE=1 SV=1	21	14	59.8	7.60947e+06	7.0768e+06	High	High
High	Master Protein	Q9QZ08	N-acetyl-D-glucosamine kinase OS=Mus musculus OX=10090 GN=Nagk PE=1 SV=3	30	14	37.2	1.01764e+07	8.16661e+06	High	High
High	Master Protein	F7CUP3	N-acetylglucosamine-6-phosphate deacetylase OS=Mus musculus OX=10090 GN=Amdhd2 PE=1 SV=2	30	14	47.1	1.26023e+07	6.48938e+06	High	High
High	Master Protein	Q80TM9	Nischarin OS=Mus musculus OX=10090 GN=Nisch PE=1 SV=2	8	14	174.9	5.65613e+06	4.65056e+06	High	High
High	Master Protein	Q8BSH9	Nucleosome assembly protein 1-like 1 OS=Mus musculus OX=10090 GN=Nap1l1 PE=1 SV=1	36	14	44.6	3.84957e+07	3.38356e+07	High	High
High	Master Protein	P70271	PDZ and LIM domain protein 4 OS=Mus musculus OX=10090 GN=Pdlim4 PE=1 SV=3	36	14	35.5	8.19054e+06	1.01677e+07	High	High
High	Master Protein	Q9WVE8	Protein kinase C and casein kinase substrate in neurons protein 2 OS=Mus musculus OX=10090 GN=Pacsin2 PE=1 SV=1	16	14	55.8	7.21718e+06	7.34553e+06	High	High
High	Master Protein	P97379	Ras GTPase-activating protein-binding protein 2 OS=Mus musculus OX=10090 GN=G3bp2 PE=1 SV=2	28	14	54.1	1.72501e+06	7.01686e+06	High	High
High	Master Protein	P35278	Ras-related protein Rab-5C OS=Mus musculus OX=10090 GN=Rab5c PE=1 SV=2	52	14	23.4	1.02591e+07	9.06269e+06	High	High
High	Master Protein	Q9EPU0	Regulator of nonsense transcripts 1 OS=Mus musculus OX=10090 GN=Upf1 PE=1 SV=2	12	14	123.9	3.81005e+06	3.66746e+06	High	High
High	Master Protein	Q9CQE8	RNA transcription, translation and transport factor protein OS=Mus musculus OX=10090 GN=RTRAF PE=1 SV=1	44	14	28.1	7.92369e+06	8.31482e+06	High	High
High	Master Protein	Q5SUT0	RNA-binding protein EWS OS=Mus musculus OX=10090 GN=Ewsr1 PE=1 SV=1	15	14	64.9	7.4806e+06	1.31232e+07	High	High
High	Master Protein	Q64012	RNA-binding protein Raly OS=Mus musculus OX=10090 GN=Raly PE=1 SV=3	34	14	33.2	6.16056e+06	4.99605e+06	High	High
High	Master Protein	Q9D1J3	SAP domain-containing ribonucleoprotein OS=Mus musculus OX=10090 GN=Sarnp PE=1 SV=3	39	14	23.5	1.17039e+07	1.02306e+07	High	High
High	Master Protein	Q6P9R2	Serine/threonine-protein kinase OSR1 OS=Mus musculus OX=10090 GN=Oxsr1 PE=1 SV=1	19	14	58.2	6.72629e+06	6.03142e+06	High	High
High	Master Protein	E9Q6P2	Serine/threonine-protein phosphatase OS=Mus musculus OX=10090 GN=Ppp3cb PE=1 SV=1	16	14	56.1	651328	557168	High	High
High	Master Protein	Q99J77	Sialic acid synthase OS=Mus musculus OX=10090 GN=Nans PE=1 SV=1	40	14	40	1.0648e+07	1.05577e+07	High	High
High	Master Protein	Q6P069	Sorcin OS=Mus musculus OX=10090 GN=Sri PE=1 SV=1	33	14	21.6	2.06168e+07	1.79014e+07	High	High
High	Master Protein	Q3TGS7	Sorting nexin-12 OS=Mus musculus OX=10090 GN=Snx12 PE=1 SV=1	42	14	19.2	1.65506e+07	1.47783e+07	High	High
High	Master Protein	E9Q4Q2	Splicing factor 1 OS=Mus musculus OX=10090 GN=Sf1 PE=1 SV=1	24	14	59.7	1.02739e+07	1.09005e+07	High	High
High	Master Protein	P63280	SUMO-conjugating enzyme UBC9 OS=Mus musculus OX=10090 GN=Ube2i PE=1 SV=1	23	14	18	3.22471e+07	2.63075e+07	High	High
High	Master Protein	Q3UDC3	Target of Myb protein 1 OS=Mus musculus OX=10090 GN=Tom1 PE=1 SV=1	22	14	57.1	4.71194e+06	5.13559e+06	High	High
High	Master Protein	Q99LG2	Transportin-2 OS=Mus musculus OX=10090 GN=Tnpo2 PE=1 SV=1	11	14	100.4	460289	372194	High	High
High	Master Protein	Q3UDE2	Tubulin--tyrosine ligase-like protein 12 OS=Mus musculus OX=10090 GN=Ttll12 PE=1 SV=1	23	14	74	5.53834e+06	4.93973e+06	High	High
High	Master Protein	P57784	U2 small nuclear ribonucleoprotein A' OS=Mus musculus OX=10090 GN=Snrpa1 PE=1 SV=2	47	14	28.3	5.90079e+06	6.12914e+06	High	High
High	Master Protein	Q9CR09	Ubiquitin-fold modifier-conjugating enzyme 1 OS=Mus musculus OX=10090 GN=Ufc1 PE=1 SV=1	44	14	19.5	2.31345e+07	2.00286e+07	High	High
High	Master Protein	O08759	Ubiquitin-protein ligase E3A OS=Mus musculus OX=10090 GN=Ube3a PE=1 SV=2	11	14	99.8	2.28841e+06	2.10118e+06	High	High
High	Master Protein	Q8BH43	Wiskott-Aldrich syndrome protein family member 2 OS=Mus musculus OX=10090 GN=Wasf2 PE=1 SV=1	18	14	54	9.39491e+06	8.53242e+06	High	High
High	Master Protein	P62281	40S ribosomal protein S11 OS=Mus musculus OX=10090 GN=Rps11 PE=1 SV=3	30	13	18.4	1.69914e+07	1.64262e+07	High	High
High	Master Protein	P12970	60S ribosomal protein L7a OS=Mus musculus OX=10090 GN=Rpl7a PE=1 SV=2	20	13	30	8.97256e+06	7.96713e+06	High	High
High	Master Protein	Q9EST5	Acidic leucine-rich nuclear phosphoprotein 32 family member B OS=Mus musculus OX=10090 GN=Anp32b PE=1 SV=1	32	13	31.1	1.05269e+07	1.03246e+07	High	High
High	Master Protein	A0A0R4J107	Acylamino-acid-releasing enzyme (Fragment) OS=Mus musculus OX=10090 GN=Apeh PE=1 SV=1	21	13	79.8	6.83938e+06	7.92471e+06	High	High
High	Master Protein	A0A087WNV1	Arf-GAP domain and FG repeat-containing protein 1 OS=Mus musculus OX=10090 GN=Agfg1 PE=1 SV=1	26	13	53.9	6.28369e+06	4.71554e+06	High	High
High	Master Protein	Q91YS8	Calcium/calmodulin-dependent protein kinase type 1 OS=Mus musculus OX=10090 GN=Camk1 PE=1 SV=1	29	13	41.6	1.18772e+07	8.75483e+06	High	High
High	Master Protein	Q6PFA2	Clathrin light chain OS=Mus musculus OX=10090 GN=Clta PE=1 SV=1	26	13	23.6	2.12576e+07	2.23543e+07	High	High
High	Master Protein	Q99KY4	Cyclin-G-associated kinase OS=Mus musculus OX=10090 GN=Gak PE=1 SV=2	8	13	143.6	2.05481e+06	1.73719e+06	High	High
High	Master Protein	P56391	Cytochrome c oxidase subunit 6B1 OS=Mus musculus OX=10090 GN=Cox6b1 PE=1 SV=2	50	13	10.1	9.64046e+06	9.26144e+06	High	High
High	Master Protein	Q9QZ73	DCN1-like protein 1 OS=Mus musculus OX=10090 GN=Dcun1d1 PE=2 SV=1	21	13	30.1	5.23398e+06	4.69418e+06	High	High
High	Master Protein	Q6W4W7	DIA3 OS=Mus musculus OX=10090 GN=Diaph2 PE=1 SV=1	13	13	125.3	2.82678e+06	2.63489e+06	High	High
High	Master Protein	Q8BVG4	Dipeptidyl peptidase 9 OS=Mus musculus OX=10090 GN=Dpp9 PE=1 SV=2	19	13	97.9	4.47497e+06	4.44672e+06	High	High
High	Master Protein	P62869	Elongin-B OS=Mus musculus OX=10090 GN=Elob PE=1 SV=1	45	13	13.2	1.8358e+07	1.50664e+07	High	High
High	Master Protein	O35382	Exocyst complex component 4 OS=Mus musculus OX=10090 GN=Exoc4 PE=1 SV=2	15	13	110.5	1276251	1.17769e+06	High	High
High	Master Protein	Q60648	Ganglioside GM2 activator OS=Mus musculus OX=10090 GN=Gm2a PE=1 SV=2	41	13	20.8	4.52912e+07	4.61109e+07	High	High
High	Master Protein	Q9WUB3	Glycogen phosphorylase, muscle form OS=Mus musculus OX=10090 GN=Pygm PE=1 SV=3	11	13	97.2	2.42371e+06	1.56708e+06	Peak Found	High
High	Master Protein	Q14AA6	GTP-binding nuclear protein Ran OS=Mus musculus OX=10090 GN=1700009N14Rik PE=2 SV=1	26	13	24.3	313987	246657	High	Peak Found
High	Master Protein	Q3UGR5	Haloacid dehalogenase-like hydrolase domain-containing protein 2 OS=Mus musculus OX=10090 GN=Hdhd2 PE=1 SV=2	47	13	28.7	1.34868e+07	1.25746e+07	High	High
High	Master Protein	D3YX62	Heme oxygenase 2 (Fragment) OS=Mus musculus OX=10090 GN=Hmox2 PE=1 SV=1	42	13	26.4	8.87367e+06	9.40964e+06	High	High
High	Master Protein	Q99LI8	Hepatocyte growth factor-regulated tyrosine kinase substrate OS=Mus musculus OX=10090 GN=Hgs PE=1 SV=2	15	13	86	8.25873e+06	6.82667e+06	High	High
High	Master Protein	P62748	Hippocalcin-like protein 1 OS=Mus musculus OX=10090 GN=Hpcal1 PE=1 SV=2	46	13	22.3	2.27297e+07	2.41204e+07	High	High
High	Master Protein	P70349	Histidine triad nucleotide-binding protein 1 OS=Mus musculus OX=10090 GN=Hint1 PE=1 SV=3	71	13	13.8	4.41049e+07	3.51082e+07	High	High
High	Master Protein	Q64282	Interferon-induced protein with tetratricopeptide repeats 1 OS=Mus musculus OX=10090 GN=Ifit1 PE=1 SV=2	23	13	53.7	4.09587e+06	4441474	High	High
High	Master Protein	A0A1B0GX81	Large proline-rich protein BAG6 (Fragment) OS=Mus musculus OX=10090 GN=Bag6 PE=1 SV=1	13	13	115.3	4.38577e+06	3717211	High	High
High	Master Protein	Q91X52	L-xylulose reductase OS=Mus musculus OX=10090 GN=Dcxr PE=1 SV=2	36	13	25.7	6.51409e+06	5.09153e+06	High	High
High	Master Protein	Q8BTZ7	Mannose-1-phosphate guanyltransferase beta OS=Mus musculus OX=10090 GN=Gmppb PE=1 SV=1	29	13	39.9	5.7443e+06	5.50199e+06	High	High
High	Master Protein	A0A140LHA2	Mitotic checkpoint protein BUB3 OS=Mus musculus OX=10090 GN=Bub3 PE=1 SV=1	33	13	36.7	6.17442e+06	5.91628e+06	High	High
High	Master Protein	Q8BFR4	N-acetylglucosamine-6-sulfatase OS=Mus musculus OX=10090 GN=Gns PE=1 SV=1	22	13	61.1	8.90153e+06	8.17085e+06	High	High
High	Master Protein	Q6R891	Neurabin-2 OS=Mus musculus OX=10090 GN=Ppp1r9b PE=1 SV=1	11	13	89.5	2.19613e+06	2.06612e+06	High	High
High	Master Protein	O08692	Neutrophilic granule protein OS=Mus musculus OX=10090 GN=Ngp PE=1 SV=1	44	13	19.3	1.99131e+07	1.87322e+07	High	High
High	Master Protein	Q9WUA2	Phenylalanine--tRNA ligase beta subunit OS=Mus musculus OX=10090 GN=Farsb PE=1 SV=2	16	13	65.7	7.81163e+06	7.03952e+06	High	High
High	Master Protein	Q9CYR6	Phosphoacetylglucosamine mutase OS=Mus musculus OX=10090 GN=Pgm3 PE=1 SV=1	20	13	59.4	3.9344e+06	4.41472e+06	High	High
High	Master Protein	Q6NSR8	Probable aminopeptidase NPEPL1 OS=Mus musculus OX=10090 GN=Npepl1 PE=1 SV=1	27	13	55.9	7.76392e+06	6.77208e+06	High	High
High	Master Protein	P56812	Programmed cell death protein 5 OS=Mus musculus OX=10090 GN=Pdcd5 PE=1 SV=3	56	13	14.3	1.17975e+07	12264152	High	High
High	Master Protein	P11680	Properdin OS=Mus musculus OX=10090 GN=Cfp PE=2 SV=2	14	13	50.3	1.09496e+07	1.05518e+07	High	High
High	Master Protein	O55234	Proteasome subunit beta type-5 OS=Mus musculus OX=10090 GN=Psmb5 PE=1 SV=3	30	13	28.5	1.17583e+07	1.39941e+07	High	High
High	Master Protein	Q60692	Proteasome subunit beta type-6 OS=Mus musculus OX=10090 GN=Psmb6 PE=1 SV=3	46	13	25.4	3.67736e+07	38301706	High	High
High	Master Protein	Q3TDD9	Protein phosphatase 1 regulatory subunit 21 OS=Mus musculus OX=10090 GN=Ppp1r21 PE=1 SV=2	19	13	88.3	2.94024e+06	2.45166e+06	High	High
High	Master Protein	E9Q2A6	Protein-tyrosine kinase 2-beta OS=Mus musculus OX=10090 GN=Ptk2b PE=1 SV=1	13	13	111	4.79965e+06	3.67248e+06	High	High
High	Master Protein	Q9CQE5	Regulator of G-protein signaling 10 OS=Mus musculus OX=10090 GN=Rgs10 PE=1 SV=1	48	13	21.1	2.33234e+07	2.20069e+07	High	High
High	Master Protein	P84096	Rho-related GTP-binding protein RhoG OS=Mus musculus OX=10090 GN=Rhog PE=1 SV=1	39	13	21.3	7.96555e+06	6.25153e+06	High	High
High	Master Protein	Q6NXL1	Sec24-related gene family, member D (S. cerevisiae) OS=Mus musculus OX=10090 GN=Sec24d PE=1 SV=1	9	13	112.6	5.26578e+06	4.93144e+06	High	High
High	Master Protein	Q3TWW8	Serine/arginine-rich splicing factor 6 OS=Mus musculus OX=10090 GN=Srsf6 PE=1 SV=1	18	13	39	1.32443e+07	1.19046e+07	High	High
High	Master Protein	P62715	Serine/threonine-protein phosphatase 2A catalytic subunit beta isoform OS=Mus musculus OX=10090 GN=Ppp2cb PE=1 SV=1	33	13	35.6	9.63785e+06	8.57913e+06	High	High
High	Master Protein	G5E8R4	Serine/threonine-protein phosphatase 6 regulatory subunit 3 OS=Mus musculus OX=10090 GN=Ppp6r3 PE=1 SV=1	14	13	97.8	3.9135e+06	3.11235e+06	High	High
High	Master Protein	P62137	Serine/threonine-protein phosphatase PP1-alpha catalytic subunit OS=Mus musculus OX=10090 GN=Ppp1ca PE=1 SV=1	22	13	37.5	1.54457e+07	1.34147e+07	High	High
High	Master Protein	P62317	Small nuclear ribonucleoprotein Sm D2 OS=Mus musculus OX=10090 GN=Snrpd2 PE=1 SV=1	55	13	13.5	1.89024e+07	1.92587e+07	High	High
High	Master Protein	Q9WTX5	S-phase kinase-associated protein 1 OS=Mus musculus OX=10090 GN=Skp1 PE=1 SV=3	44	13	18.7	5.81585e+06	6.32225e+06	High	High
High	Master Protein	P97496	SWI/SNF complex subunit SMARCC1 OS=Mus musculus OX=10090 GN=Smarcc1 PE=1 SV=2	8	13	122.8	40278.5	327429	High	High
High	Master Protein	Q91ZW3	SWI/SNF-related matrix-associated actin-dependent regulator of chromatin subfamily A member 5 OS=Mus musculus OX=10090 GN=Smarca5 PE=1 SV=1	8	13	121.6	3.85603e+06	3.2522e+06	High	High
High	Master Protein	Q9CQW1	Synaptobrevin homolog YKT6 OS=Mus musculus OX=10090 GN=Ykt6 PE=1 SV=1	46	13	22.3	1.062e+07	9.0723e+06	High	High
High	Master Protein	Q9Z1A1	TFG protein OS=Mus musculus OX=10090 GN=Tfg PE=1 SV=1	26	13	43	9.26366e+06	9.29484e+06	High	High
High	Master Protein	A0A1Y7VJ48	Tubulin-specific chaperone A OS=Mus musculus OX=10090 GN=Tbca PE=1 SV=1	60	13	9.9	9.39895e+06	7485801	High	High
High	Master Protein	Q8BYA0	Tubulin-specific chaperone D OS=Mus musculus OX=10090 GN=Tbcd PE=1 SV=1	13	13	133.2	2.10094e+06	2.51535e+06	High	High
High	Master Protein	Q6NV83	U2 snRNP-associated SURP motif-containing protein OS=Mus musculus OX=10090 GN=U2surp PE=1 SV=3	12	13	118.2	2.76462e+06	2.24765e+06	High	High
High	Master Protein	Q9QZM0	Ubiquilin-2 OS=Mus musculus OX=10090 GN=Ubqln2 PE=1 SV=2	18	13	67.3	2.51645e+06	2.39171e+06	High	High
High	Master Protein	Q91W86	Vacuolar protein sorting-associated protein 11 homolog OS=Mus musculus OX=10090 GN=Vps11 PE=1 SV=3	10	13	107.7	4.25279e+06	4.35505e+06	High	High
High	Master Protein	Q62523	Zyxin OS=Mus musculus OX=10090 GN=Zyx PE=1 SV=2	19	13	60.5	1.05555e+07	9.84455e+06	High	High
High	Master Protein	O35226	26S proteasome non-ATPase regulatory subunit 4 OS=Mus musculus OX=10090 GN=Psmd4 PE=1 SV=1	16	12	40.7	6.17446e+06	5.66026e+06	High	High
High	Master Protein	P25444	40S ribosomal protein S2 OS=Mus musculus OX=10090 GN=Rps2 PE=1 SV=3	28	12	31.2	2.10634e+07	1.94618e+07	High	High
High	Master Protein	P97461	40S ribosomal protein S5 OS=Mus musculus OX=10090 GN=Rps5 PE=1 SV=3	37	12	22.9	7.66763e+06	6528290	High	High
High	Master Protein	P62082	40S ribosomal protein S7 OS=Mus musculus OX=10090 GN=Rps7 PE=2 SV=1	30	12	22.1	1.79132e+07	1.49949e+07	High	High
High	Master Protein	Q99K28	ADP-ribosylation factor GTPase-activating protein 2 OS=Mus musculus OX=10090 GN=Arfgap2 PE=1 SV=1	13	12	56.6	3.29094e+06	3.31222e+06	High	High
High	Master Protein	G5E8V9	ADP-ribosylation factor-interacting protein 1 OS=Mus musculus OX=10090 GN=Arfip1 PE=1 SV=1	28	12	41.5	2.27802e+07	1.98088e+07	High	High
High	Master Protein	F8VPN4	Amylo-1,6-glucosidase, 4-alpha-glucanotransferase OS=Mus musculus OX=10090 GN=Agl PE=1 SV=1	7	12	174.2	4.03686e+06	3.6656e+06	High	High
High	Master Protein	Q62048	Astrocytic phosphoprotein PEA-15 OS=Mus musculus OX=10090 GN=Pea15 PE=1 SV=1	70	12	15	1.04865e+07	11609868	High	High
High	Master Protein	Q8K019	Bcl-2-associated transcription factor 1 OS=Mus musculus OX=10090 GN=Bclaf1 PE=1 SV=2	13	12	105.9	3.24768e+06	3.05754e+06	High	High
High	Master Protein	Q99MK8	Beta-adrenergic receptor kinase 1 OS=Mus musculus OX=10090 GN=Grk2 PE=1 SV=2	16	12	79.6	3.44292e+06	2.9432e+06	High	High
High	Master Protein	Q8K2Q7	BRO1 domain-containing protein BROX OS=Mus musculus OX=10090 GN=Brox PE=1 SV=1	32	12	46.2	9.80157e+06	10434213	High	High
High	Master Protein	P60766	Cell division control protein 42 homolog OS=Mus musculus OX=10090 GN=Cdc42 PE=1 SV=2	37	12	21.2	3.10803e+07	2.43614e+07	High	High
High	Master Protein	Q61686	Chromobox protein homolog 5 OS=Mus musculus OX=10090 GN=Cbx5 PE=1 SV=1	46	12	22.2	3.34769e+06	2.91995e+06	High	High
High	Master Protein	Q5SUH7	Clathrin interactor 1 OS=Mus musculus OX=10090 GN=Clint1 PE=1 SV=1	17	12	67.7	2.2178e+06	2.25986e+06	High	High
High	Master Protein	O89079	Coatomer subunit epsilon OS=Mus musculus OX=10090 GN=Cope PE=1 SV=3	31	12	34.5	9.41928e+06	9.94474e+06	High	High
High	Master Protein	Q8K3H0	DCC-interacting protein 13-alpha OS=Mus musculus OX=10090 GN=Appl1 PE=1 SV=1	16	12	79.3	3.78615e+06	2.91048e+06	High	High
High	Master Protein	Q3U9G9	Delta(14)-sterol reductase LBR OS=Mus musculus OX=10090 GN=Lbr PE=1 SV=2	12	12	71.4	5.05335e+06	4.97161e+06	High	High
High	Master Protein	Q9ET22	Dipeptidyl peptidase 2 OS=Mus musculus OX=10090 GN=Dpp7 PE=1 SV=2	19	12	56.2	7.30295e+06	7.99853e+06	High	High
High	Master Protein	E9PUD2	Dynamin-1-like protein OS=Mus musculus OX=10090 GN=Dnm1l PE=1 SV=1	15	12	79.5	6.51774e+06	3.79364e+06	High	High
High	Master Protein	Q8BGB7	Enolase-phosphatase E1 OS=Mus musculus OX=10090 GN=Enoph1 PE=1 SV=1	42	12	28.6	9.73422e+06	9.86588e+06	High	High
High	Master Protein	O54782	Epididymis-specific alpha-mannosidase OS=Mus musculus OX=10090 GN=Man2b2 PE=1 SV=2	10	12	115.5	2.70045e+06	2.72108e+06	High	High
High	Master Protein	Q3UGC7	Eukaryotic translation initiation factor 3 subunit J-A OS=Mus musculus OX=10090 GN=Eif3j1 PE=2 SV=1	57	12	29.3	6.93905e+06	7.05536e+06	High	High
High	Master Protein	P59325	Eukaryotic translation initiation factor 5 OS=Mus musculus OX=10090 GN=Eif5 PE=1 SV=1	20	12	48.9	7.92549e+06	7.36165e+06	High	High
High	Master Protein	Q9CZU3	Exosome RNA helicase MTR4 OS=Mus musculus OX=10090 GN=Mtrex PE=1 SV=1	11	12	117.6	4.30132e+06	4.12853e+06	High	High
High	Master Protein	G3X9T7	Galectin-9 OS=Mus musculus OX=10090 GN=Lgals9 PE=1 SV=1	31	12	40	5.38216e+06	5.12938e+06	High	High
High	Master Protein	Q9Z0L8	Gamma-glutamyl hydrolase OS=Mus musculus OX=10090 GN=Ggh PE=1 SV=2	27	12	35.4	1.01093e+07	1.09035e+07	High	High
High	Master Protein	P62880	Guanine nucleotide-binding protein G(I)/G(S)/G(T) subunit beta-2 OS=Mus musculus OX=10090 GN=Gnb2 PE=1 SV=3	19	12	37.3	12346823	1.18838e+07	High	High
High	Master Protein	Q61107	Guanylate-binding protein 4 OS=Mus musculus OX=10090 GN=Gbp4 PE=1 SV=1	13	12	70.8	5.45228e+06	4.63739e+06	High	High
High	Master Protein	Q3TEA8	Heterochromatin protein 1-binding protein 3 OS=Mus musculus OX=10090 GN=Hp1bp3 PE=1 SV=1	18	12	60.8	5.5813e+06	5.4725e+06	High	High
High	Master Protein	P70333	Heterogeneous nuclear ribonucleoprotein H2 OS=Mus musculus OX=10090 GN=Hnrnph2 PE=1 SV=1	21	12	49.2	534320	552264	Peak Found	High
High	Master Protein	Q00PI9	Heterogeneous nuclear ribonucleoprotein U-like protein 2 OS=Mus musculus OX=10090 GN=Hnrnpul2 PE=1 SV=2	9	12	84.9	6.53415e+06	6.06386e+06	High	High
High	Master Protein	A2AP78	High mobility group protein B3 (Fragment) OS=Mus musculus OX=10090 GN=Hmgb3 PE=1 SV=1	40	12	18.3	5.22737e+06	5.1681e+06	High	High
High	Master Protein	A0A384DV79	High mobility group protein HMG-I/HMG-Y OS=Mus musculus OX=10090 GN=Hmga1 PE=1 SV=1	32	12	10.5	5095974	6.31082e+06	High	High
High	Master Protein	O35344	Importin subunit alpha-4 OS=Mus musculus OX=10090 GN=Kpna3 PE=1 SV=1	20	12	57.7	5.66593e+06	6.58473e+06	High	High
High	Master Protein	P97484	Leukocyte immunoglobulin-like receptor subfamily B member 3 OS=Mus musculus OX=10090 GN=Lilrb3 PE=1 SV=1	14	12	93	3.40432e+06	3.1105e+06	High	High
High	Master Protein	Q9Z0M5	Lysosomal acid lipase/cholesteryl ester hydrolase OS=Mus musculus OX=10090 GN=Lipa PE=1 SV=2	29	12	45.3	1.12989e+07	1.25093e+07	High	High
High	Master Protein	Q9Z2C5	Myotubularin OS=Mus musculus OX=10090 GN=Mtm1 PE=1 SV=2	15	12	69.5	2.77247e+06	2.38352e+06	High	High
High	Master Protein	P70670	Nascent polypeptide-associated complex subunit alpha, muscle-specific form OS=Mus musculus OX=10090 GN=Naca PE=1 SV=2	3	12	220.4	2.38713e+07	2.14846e+07	High	High
High	Master Protein	P54729	NEDD8 ultimate buster 1 OS=Mus musculus OX=10090 GN=Nub1 PE=1 SV=2	14	12	70.3	2.73189e+06	2.35119e+06	High	High
High	Master Protein	Q8BQ30	Phostensin OS=Mus musculus OX=10090 GN=Ppp1r18 PE=1 SV=1	19	12	65.6	4.59529e+06	3.63988e+06	High	High
High	Master Protein	O54824	Pro-interleukin-16 OS=Mus musculus OX=10090 GN=Il16 PE=1 SV=3	8	12	141.3	4.11769e+06	3.72208e+06	High	High
High	Master Protein	O35955	Proteasome subunit beta type-10 OS=Mus musculus OX=10090 GN=Psmb10 PE=1 SV=1	29	12	29	1.55865e+07	1.34426e+07	High	High
High	Master Protein	A2A842	Protein 4.1 OS=Mus musculus OX=10090 GN=Epb41 PE=1 SV=1	17	12	85.6	4.51139e+06	3.35275e+06	High	High
High	Master Protein	Q8CJG0	Protein argonaute-2 OS=Mus musculus OX=10090 GN=Ago2 PE=1 SV=3	15	12	97.2	5.35487e+06	4.98574e+06	High	High
High	Master Protein	P28867	Protein kinase C delta type OS=Mus musculus OX=10090 GN=Prkcd PE=1 SV=3	10	12	77.5	1.04056e+07	8.89764e+06	High	High
High	Master Protein	Q80TL7	Protein MON2 homolog OS=Mus musculus OX=10090 GN=Mon2 PE=1 SV=2	7	12	189	5.83975e+06	5.21444e+06	High	High
High	Master Protein	Q3U2P1	Protein transport protein Sec24A OS=Mus musculus OX=10090 GN=Sec24a PE=1 SV=1	7	12	118.7	3.11824e+06	2.58555e+06	High	High
High	Master Protein	Q9D1G1	Ras-related protein Rab-1B OS=Mus musculus OX=10090 GN=Rab1b PE=1 SV=1	35	12	22.2	1.8201e+06	1.47016e+06	High	High
High	Master Protein	P61028	Ras-related protein Rab-8B OS=Mus musculus OX=10090 GN=Rab8b PE=1 SV=1	36	12	23.6	3.69805e+06	3.14586e+06	High	High
High	Master Protein	Q60855	Receptor-interacting serine/threonine-protein kinase 1 OS=Mus musculus OX=10090 GN=Ripk1 PE=1 SV=1	12	12	74.8	5.99456e+06	4.77696e+06	High	High
High	Master Protein	Q9CSU0	Regulation of nuclear pre-mRNA domain-containing protein 1B OS=Mus musculus OX=10090 GN=Rprd1b PE=1 SV=2	38	12	36.9	5231363	4.98672e+06	High	High
High	Master Protein	Q9CYN9	Renin receptor OS=Mus musculus OX=10090 GN=Atp6ap2 PE=1 SV=2	29	12	39.1	7893104	8.5191e+06	High	High
High	Master Protein	P47968	Ribose-5-phosphate isomerase OS=Mus musculus OX=10090 GN=Rpia PE=1 SV=2	26	12	32.4	5.63231e+06	5.94593e+06	High	High
High	Master Protein	Q8BRF7	Sec1 family domain-containing protein 1 OS=Mus musculus OX=10090 GN=Scfd1 PE=1 SV=1	24	12	72.3	4.33888e+06	4.07847e+06	High	High
High	Master Protein	Q8BH69	Selenide, water dikinase 1 OS=Mus musculus OX=10090 GN=Sephs1 PE=1 SV=1	30	12	42.9	1.04791e+07	6.96328e+06	High	High
High	Master Protein	A0A0R4J069	Selenocysteine lyase OS=Mus musculus OX=10090 GN=Scly PE=1 SV=1	22	12	47.2	5.80968e+06	5.27473e+06	High	High
High	Master Protein	B7ZC46	Septin 8 OS=Mus musculus OX=10090 GN=Sept8 PE=1 SV=1	19	12	50.9	3.07357e+06	2.75148e+06	High	High
High	Master Protein	A0A1Y7VMH3	Serine/threonine-protein kinase VRK1 OS=Mus musculus OX=10090 GN=Vrk1 PE=1 SV=1	22	12	46.8	5.08783e+06	4.38262e+06	High	High
High	Master Protein	G3UVU2	Splicing factor 3A subunit 2 OS=Mus musculus OX=10090 GN=Sf3a2 PE=1 SV=1	19	12	51.2	5.19197e+06	5.29445e+06	High	High
High	Master Protein	Q99JR8	SWI/SNF-related matrix-associated actin-dependent regulator of chromatin subfamily D member 2 OS=Mus musculus OX=10090 GN=Smarcd2 PE=1 SV=2	19	12	59	2.32484e+06	2.07838e+06	High	High
High	Master Protein	Q9ER00	Syntaxin-12 OS=Mus musculus OX=10090 GN=Stx12 PE=1 SV=1	28	12	31.2	1.40325e+07	1.42989e+07	High	High
High	Master Protein	Q9JKB1	Ubiquitin carboxyl-terminal hydrolase isozyme L3 OS=Mus musculus OX=10090 GN=Uchl3 PE=1 SV=2	40	12	26.1	1.05315e+07	1.01549e+07	High	High
High	Master Protein	Q9CQ80	Vacuolar protein-sorting-associated protein 25 OS=Mus musculus OX=10090 GN=Vps25 PE=1 SV=1	41	12	20.7	6.93488e+06	6.06602e+06	High	High
High	Master Protein	Q8R5L3	Vam6/Vps39-like protein OS=Mus musculus OX=10090 GN=Vps39 PE=1 SV=1	10	12	101.6	1.33179e+06	1.26655e+06	High	High
High	Master Protein	Q3UPV6	Voltage-gated potassium channel subunit beta-2 OS=Mus musculus OX=10090 GN=Kcnab2 PE=1 SV=1	25	12	39.3	5.17468e+06	6.04875e+06	High	High
High	Master Protein	E9Q2M9	WD repeat- and FYVE domain-containing protein 4 OS=Mus musculus OX=10090 GN=Wdfy4 PE=1 SV=2	4	12	354.1	3.58696e+06	3.20934e+06	High	High
High	Master Protein	Q3UKJ7	WD40 repeat-containing protein SMU1 OS=Mus musculus OX=10090 GN=Smu1 PE=2 SV=2	22	12	57.5	3.10032e+06	2.41953e+06	High	High
High	Master Protein	A2APF7	Z-DNA-binding protein 1 OS=Mus musculus OX=10090 GN=Zbp1 PE=1 SV=1	33	12	44.2	6.24283e+06	5.62665e+06	High	High
High	Master Protein	P62267	40S ribosomal protein S23 OS=Mus musculus OX=10090 GN=Rps23 PE=1 SV=3	30	11	15.8	1.31004e+07	1.12081e+07	High	High
High	Master Protein	P62754	40S ribosomal protein S6 OS=Mus musculus OX=10090 GN=Rps6 PE=1 SV=1	29	11	28.7	7.25933e+06	7.03494e+06	High	High
High	Master Protein	Q9JM14	5'(3')-deoxyribonucleotidase, cytosolic type OS=Mus musculus OX=10090 GN=Nt5c PE=1 SV=1	50	11	23.1	9.46644e+06	7816785	High	High
High	Master Protein	P35979	60S ribosomal protein L12 OS=Mus musculus OX=10090 GN=Rpl12 PE=1 SV=2	50	11	17.8	2.62675e+07	2.76133e+07	High	High
High	Master Protein	P61255	60S ribosomal protein L26 OS=Mus musculus OX=10090 GN=Rpl26 PE=1 SV=1	35	11	17.2	7.88744e+06	7.44565e+06	High	High
High	Master Protein	P61358	60S ribosomal protein L27 OS=Mus musculus OX=10090 GN=Rpl27 PE=1 SV=2	54	11	15.8	1.08495e+07	1.04215e+07	High	High
High	Master Protein	Q3UZG4	Aminoacyl tRNA synthase complex-interacting multifunctional protein 1 OS=Mus musculus OX=10090 GN=Aimp1 PE=1 SV=1	31	11	35.1	1.61097e+07	1.32578e+07	High	High
High	Master Protein	A2AUK7	Band 4.1-like protein 1 OS=Mus musculus OX=10090 GN=Epb41l1 PE=1 SV=1	11	11	81.8	2.33242e+06	1.65624e+06	High	High
High	Master Protein	Q9WVJ3	Carboxypeptidase Q OS=Mus musculus OX=10090 GN=Cpq PE=1 SV=1	22	11	51.8	6.22237e+06	6.59645e+06	High	High
High	Master Protein	Q91W50	Cold shock domain-containing protein E1 OS=Mus musculus OX=10090 GN=Csde1 PE=1 SV=1	10	11	88.7	3.25765e+06	2.43347e+06	High	High
High	Master Protein	O88545	COP9 signalosome complex subunit 6 OS=Mus musculus OX=10090 GN=Cops6 PE=1 SV=1	39	11	35.9	8.57684e+06	8.351e+06	High	High
High	Master Protein	Q9CZ04	COP9 signalosome complex subunit 7a OS=Mus musculus OX=10090 GN=Cops7a PE=1 SV=2	41	11	30.2	4.2e+06	3.69023e+06	High	High
High	Master Protein	A2BFF8	Cytoplasmic dynein 1 intermediate chain 2 OS=Mus musculus OX=10090 GN=Dync1i2 PE=1 SV=1	15	11	68.2	3.4967e+06	3.04846e+06	High	High
High	Master Protein	B1AQF4	Dual specificity protein phosphatase OS=Mus musculus OX=10090 GN=Dusp3 PE=1 SV=1	44	11	23.2	1.55304e+07	1.47696e+07	High	High
High	Master Protein	Q9WUK2	Eukaryotic translation initiation factor 4H OS=Mus musculus OX=10090 GN=Eif4h PE=1 SV=3	31	11	27.3	3.91233e+06	3.72639e+06	High	High
High	Master Protein	Q91Z40	Gbp6 protein OS=Mus musculus OX=10090 GN=Gbp7 PE=1 SV=2	13	11	72.7	1.42939e+06	1.20685e+06	High	High
High	Master Protein	P15105	Glutamine synthetase OS=Mus musculus OX=10090 GN=Glul PE=1 SV=6	15	11	42.1	6.60519e+06	5.40264e+06	High	High
High	Master Protein	A0A0A6YY34	Glutathione peroxidase OS=Mus musculus OX=10090 GN=Gpx1 PE=1 SV=1	45	11	16.3	7.65853e+06	7.47912e+06	High	High
High	Master Protein	P15626	Glutathione S-transferase Mu 2 OS=Mus musculus OX=10090 GN=Gstm2 PE=1 SV=2	29	11	25.7	2.3821e+06	1.9239e+06	High	High
High	Master Protein	Q99L27	GMP reductase 2 OS=Mus musculus OX=10090 GN=Gmpr2 PE=1 SV=2	15	11	38	4.99831e+06	3.95139e+06	High	High
High	Master Protein	Q61635	GTP-binding protein OS=Mus musculus OX=10090 GN=Ifi47 PE=1 SV=1	19	11	46.8	4.15038e+06	3.17548e+06	High	High
High	Master Protein	P08752	Guanine nucleotide-binding protein G(i) subunit alpha-2 OS=Mus musculus OX=10090 GN=Gnai2 PE=1 SV=5	26	11	40.5	7.66766e+06	6.95593e+06	High	High
High	Master Protein	P62874	Guanine nucleotide-binding protein G(I)/G(S)/G(T) subunit beta-1 OS=Mus musculus OX=10090 GN=Gnb1 PE=1 SV=3	19	11	37.4	1.10289e+06	774743	High	High
High	Master Protein	Q6PGH2	Jupiter microtubule associated homolog 2 OS=Mus musculus OX=10090 GN=Jpt2 PE=1 SV=1	52	11	20	1.04354e+07	1.20093e+07	High	High
High	Master Protein	A3KG93	Lysine-specific histone demethylase OS=Mus musculus OX=10090 GN=Kdm1a PE=1 SV=1	16	11	94.6	2337796	2.12351e+06	High	High
High	Master Protein	Q9CYG7	Mitochondrial import receptor subunit TOM34 OS=Mus musculus OX=10090 GN=Tomm34 PE=1 SV=1	25	11	34.3	1.60825e+06	1.51752e+06	High	High
High	Master Protein	Q68FH4	N-acetylgalactosamine kinase OS=Mus musculus OX=10090 GN=Galk2 PE=1 SV=1	19	11	50.5	6.96676e+06	6.15832e+06	High	High
High	Master Protein	Q3V4D5	N-alpha-acetyltransferase 10 OS=Mus musculus OX=10090 GN=Naa10 PE=1 SV=1	37	11	24.8	2.55465e+06	2.30417e+06	High	High
High	Master Protein	B7ZNL2	Nap1l4 protein OS=Mus musculus OX=10090 GN=Nap1l4 PE=1 SV=1	22	11	43.9	1.44714e+07	1.21313e+07	High	High
High	Master Protein	Q99JF8	PC4 and SFRS1-interacting protein OS=Mus musculus OX=10090 GN=Psip1 PE=1 SV=1	13	11	59.7	2.44286e+06	1.94208e+06	High	High
High	Master Protein	Q62446	Peptidyl-prolyl cis-trans isomerase FKBP3 OS=Mus musculus OX=10090 GN=Fkbp3 PE=1 SV=2	34	11	25.1	9.69332e+06	1.03759e+07	High	High
High	Master Protein	Q6P8I4	PEST proteolytic signal-containing nuclear protein OS=Mus musculus OX=10090 GN=Pcnp PE=1 SV=1	42	11	19	8.92777e+06	7.67383e+06	High	High
High	Master Protein	A0A087WPT7	Phosphatidylinositol 3,4,5-trisphosphate 5-phosphatase 2 (Fragment) OS=Mus musculus OX=10090 GN=Inppl1 PE=1 SV=1	7	11	128.9	2.92184e+06	1.86633e+06	High	High
High	Master Protein	G3UXA6	Polypyrimidine tract-binding protein 3 OS=Mus musculus OX=10090 GN=Ptbp3 PE=1 SV=1	15	11	59.7	8.69341e+06	7.29582e+06	High	High
High	Master Protein	P22907	Porphobilinogen deaminase OS=Mus musculus OX=10090 GN=Hmbs PE=1 SV=2	22	11	39.3	6.70707e+06	5.61763e+06	High	High
High	Master Protein	Q8C7J6	Potassium channel tetramerisation domain-containing 12b OS=Mus musculus OX=10090 GN=Kctd12b PE=1 SV=1	23	11	33.3	2.61909e+06	2.33213e+06	High	High
High	Master Protein	Q8VE70	Programmed cell death protein 10 OS=Mus musculus OX=10090 GN=Pdcd10 PE=1 SV=1	43	11	24.7	6.60676e+06	6.3448e+06	High	High
High	Master Protein	Q9R0Q7	Prostaglandin E synthase 3 OS=Mus musculus OX=10090 GN=Ptges3 PE=1 SV=1	36	11	18.7	4.05269e+06	6.54021e+06	High	High
High	Master Protein	Q3UM45	Protein phosphatase 1 regulatory subunit 7 OS=Mus musculus OX=10090 GN=Ppp1r7 PE=1 SV=2	32	11	41.3	7.55688e+06	6.19224e+06	High	High
High	Master Protein	Q640N3	Rho GTPase-activating protein 30 OS=Mus musculus OX=10090 GN=Arhgap30 PE=1 SV=3	11	11	120	3.07423e+06	2.58307e+06	High	High
High	Master Protein	P70122	Ribosome maturation protein SBDS OS=Mus musculus OX=10090 GN=Sbds PE=1 SV=4	35	11	28.8	2.11949e+07	1.86058e+07	High	High
High	Master Protein	P63087	Serine/threonine-protein phosphatase PP1-gamma catalytic subunit OS=Mus musculus OX=10090 GN=Ppp1cc PE=1 SV=1	21	11	37	3.25237e+06	3.72445e+06	High	High
High	Master Protein	P52633	Signal transducer and transcription activator 6 OS=Mus musculus OX=10090 GN=Stat6 PE=1 SV=2	10	11	93.4	3.97964e+06	3.41557e+06	High	High
High	Master Protein	Q8BJU0	Small glutamine-rich tetratricopeptide repeat-containing protein alpha OS=Mus musculus OX=10090 GN=Sgta PE=1 SV=2	31	11	34.3	8.59964e+06	7.48642e+06	High	High
High	Master Protein	Q8BQ46	TAF15 RNA polymerase II, TATA box binding protein (TBP)-associated factor OS=Mus musculus OX=10090 GN=Taf15 PE=1 SV=1	16	11	58.6	935531	863075	High	High
High	Master Protein	Q61390	T-complex protein 1 subunit zeta-2 OS=Mus musculus OX=10090 GN=Cct6b PE=1 SV=4	13	11	58.1	3.18219e+06	2321322	High	Peak Found
High	Master Protein	Q8VBT9	Tether containing UBX domain for GLUT4 OS=Mus musculus OX=10090 GN=Aspscr1 PE=1 SV=1	25	11	59.8	1.20151e+06	902455	High	High
High	Master Protein	A0A0R4IZY0	Thimet oligopeptidase OS=Mus musculus OX=10090 GN=Thop1 PE=1 SV=1	12	11	78	4.08796e+06	3.97292e+06	High	High
High	Master Protein	Q9DBB8	Trans-1,2-dihydrobenzene-1,2-diol dehydrogenase OS=Mus musculus OX=10090 GN=Dhdh PE=1 SV=1	29	11	36.3	9.84925e+06	7.33886e+06	High	High
High	Master Protein	Q3TKT4	Transcription activator BRG1 OS=Mus musculus OX=10090 GN=Smarca4 PE=1 SV=1	6	11	181.3	2.38303e+06	1.88039e+06	High	High
High	Master Protein	P42669	Transcriptional activator protein Pur-alpha OS=Mus musculus OX=10090 GN=Pura PE=1 SV=1	29	11	34.9	6.23018e+06	6.12037e+06	High	High
High	Master Protein	E9Q405	Unconventional myosin-XVIIIa OS=Mus musculus OX=10090 GN=Myo18a PE=1 SV=1	5	11	193.5	397363	558311	High	High
High	Master Protein	Q3TN85	UV excision repair protein RAD23 homolog A (Fragment) OS=Mus musculus OX=10090 GN=Rad23a PE=1 SV=1	34	11	34.8	5.97153e+06	5.50609e+06	High	High
High	Master Protein	Q3UMB9	WASH complex subunit 4 OS=Mus musculus OX=10090 GN=Washc4 PE=1 SV=2	10	11	136.3	1.75183e+07	1.85401e+07	High	High
High	Master Protein	Q8BWT1	3-ketoacyl-CoA thiolase, mitochondrial OS=Mus musculus OX=10090 GN=Acaa2 PE=1 SV=3	25	10	41.8	7.05107e+06	6.91181e+06	High	High
High	Master Protein	P62245	40S ribosomal protein S15a OS=Mus musculus OX=10090 GN=Rps15a PE=1 SV=2	59	10	14.8	2.25567e+07	2.18064e+07	High	High
High	Master Protein	Q9DBR1	5'-3' exoribonuclease 2 OS=Mus musculus OX=10090 GN=Xrn2 PE=1 SV=1	11	10	108.6	2.9659e+06	3615141	High	High
High	Master Protein	P47963	60S ribosomal protein L13 OS=Mus musculus OX=10090 GN=Rpl13 PE=1 SV=3	23	10	24.3	8.96463e+06	7.71197e+06	High	High
High	Master Protein	Q9CZM2	60S ribosomal protein L15 OS=Mus musculus OX=10090 GN=Rpl15 PE=1 SV=4	25	10	24.1	3.86088e+06	3.67323e+06	High	High
High	Master Protein	Q9CPR4	60S ribosomal protein L17 OS=Mus musculus OX=10090 GN=Rpl17 PE=1 SV=3	32	10	21.4	6.25623e+06	6.15947e+06	High	High
High	Master Protein	P84099	60S ribosomal protein L19 OS=Mus musculus OX=10090 GN=Rpl19 PE=1 SV=1	27	10	23.5	6.0284e+06	6.11563e+06	High	High
High	Master Protein	P14148	60S ribosomal protein L7 OS=Mus musculus OX=10090 GN=Rpl7 PE=1 SV=2	31	10	31.4	6.20733e+06	4.29789e+06	High	High
High	Master Protein	P70158	Acid sphingomyelinase-like phosphodiesterase 3a OS=Mus musculus OX=10090 GN=Smpdl3a PE=1 SV=2	24	10	49.8	7.1986e+06	8.1446e+06	High	High
High	Master Protein	Q8VEH3	ADP-ribosylation factor-like protein 8A OS=Mus musculus OX=10090 GN=Arl8a PE=1 SV=1	46	10	21.4	1.98953e+06	1.53123e+06	High	High
High	Master Protein	Q9CQW2	ADP-ribosylation factor-like protein 8B OS=Mus musculus OX=10090 GN=Arl8b PE=1 SV=1	47	10	21.5	8.44107e+06	5.82711e+06	High	High
High	Master Protein	F7CVJ5	AHNAK nucleoprotein 2 (Fragment) OS=Mus musculus OX=10090 GN=Ahnak2 PE=1 SV=1	42	10	115.2	6.7054e+06	5.75466e+06	High	High
High	Master Protein	Q3UHJ0	AP2-associated protein kinase 1 OS=Mus musculus OX=10090 GN=Aak1 PE=1 SV=2	12	10	103.3	2.48415e+06	2.76952e+06	High	High
High	Master Protein	P12382	ATP-dependent 6-phosphofructokinase, liver type OS=Mus musculus OX=10090 GN=Pfkl PE=1 SV=4	10	10	85.3	2.18035e+06	1.6418e+06	High	High
High	Master Protein	A2BH40	AT-rich interactive domain-containing protein 1A OS=Mus musculus OX=10090 GN=Arid1a PE=1 SV=1	5	10	241.9	1.74554e+06	2.33002e+06	High	High
High	Master Protein	Q9ES46	Beta-parvin OS=Mus musculus OX=10090 GN=Parvb PE=1 SV=1	21	10	41.6	5.44346e+06	5.37528e+06	High	High
High	Master Protein	Q8BW96	Calcium/calmodulin-dependent protein kinase type 1D OS=Mus musculus OX=10090 GN=Camk1d PE=1 SV=2	18	10	42.9	821183	1.18483e+06	High	High
High	Master Protein	P0DP27	Calmodulin-2 OS=Mus musculus OX=10090 GN=Calm2 PE=1 SV=1	50	10	16.8	1.54517e+07	2.15579e+07	High	High
High	Master Protein	P31324	cAMP-dependent protein kinase type II-beta regulatory subunit OS=Mus musculus OX=10090 GN=Prkar2b PE=1 SV=3	27	10	46.1	2.82378e+06	2.48931e+06	High	High
High	Master Protein	Q810U5	Coiled-coil domain-containing protein 50 OS=Mus musculus OX=10090 GN=Ccdc50 PE=1 SV=1	35	10	35.3	3.1257e+06	3.78879e+06	High	High
High	Master Protein	Q7TQK5	Coiled-coil domain-containing protein 93 OS=Mus musculus OX=10090 GN=Ccdc93 PE=1 SV=1	17	10	72.6	3.274e+06	2.27482e+06	High	High
High	Master Protein	Q8VBV7	COP9 signalosome complex subunit 8 OS=Mus musculus OX=10090 GN=Cops8 PE=1 SV=1	57	10	23.2	5.95863e+06	4.89037e+06	High	High
High	Master Protein	Q9D1P4	Cysteine and histidine-rich domain-containing protein 1 OS=Mus musculus OX=10090 GN=Chordc1 PE=1 SV=1	29	10	37.3	7.53829e+06	7.22991e+06	High	High
High	Master Protein	Q9DBE0	Cysteine sulfinic acid decarboxylase OS=Mus musculus OX=10090 GN=Csad PE=1 SV=1	16	10	55.1	2.73428e+06	2.50546e+06	High	High
High	Master Protein	G5E850	Cytochrome b5 OS=Mus musculus OX=10090 GN=Cyb5a PE=1 SV=1	76	10	11.1	1.06798e+07	8.83712e+06	High	High
High	Master Protein	A6H8H2	DENN domain-containing protein 4C OS=Mus musculus OX=10090 GN=Dennd4c PE=1 SV=1	5	10	211.3	3.57953e+06	3.01969e+06	High	High
High	Master Protein	Q8C255	Dipeptidase 2 OS=Mus musculus OX=10090 GN=Dpep2 PE=1 SV=1	14	10	52.6	4.42741e+06	5.19167e+06	High	High
High	Master Protein	Q3UH60	Disco-interacting protein 2 homolog B OS=Mus musculus OX=10090 GN=Dip2b PE=1 SV=1	6	10	171	1.25599e+06	1.1727e+06	High	High
High	Master Protein	Q61881	DNA replication licensing factor MCM7 OS=Mus musculus OX=10090 GN=Mcm7 PE=1 SV=1	10	10	81.2	2.77896e+06	2.5694e+06	High	High
High	Master Protein	P31938	Dual specificity mitogen-activated protein kinase kinase 1 OS=Mus musculus OX=10090 GN=Map2k1 PE=1 SV=2	21	10	43.4	1.07588e+07	1.024e+07	High	High
High	Master Protein	P63073	Eukaryotic translation initiation factor 4E OS=Mus musculus OX=10090 GN=Eif4e PE=1 SV=1	33	10	25	1.59115e+07	1.51028e+07	High	High
High	Master Protein	Q8R0A0	General transcription factor IIF subunit 2 OS=Mus musculus OX=10090 GN=Gtf2f2 PE=1 SV=1	37	10	28.4	4.66461e+06	3.81212e+06	High	High
High	Master Protein	Q9CRC9	Glucosamine-6-phosphate isomerase 2 OS=Mus musculus OX=10090 GN=Gnpda2 PE=1 SV=1	20	10	31.1	1.26332e+06	1.01434e+06	High	High
High	Master Protein	P30115	Glutathione S-transferase A3 OS=Mus musculus OX=10090 GN=Gsta3 PE=1 SV=2	31	10	25.3	6.07902e+06	4.61913e+06	High	High
High	Master Protein	Q9JL62	Glycolipid transfer protein OS=Mus musculus OX=10090 GN=Gltp PE=1 SV=3	38	10	23.7	1.26086e+07	1.18843e+07	High	High
High	Master Protein	Q8VEB4	Group XV phospholipase A2 OS=Mus musculus OX=10090 GN=Pla2g15 PE=1 SV=1	20	10	47.3	4.60955e+06	4.72322e+06	High	High
High	Master Protein	E9Q0U7	Heat shock protein 105 kDa OS=Mus musculus OX=10090 GN=Hsph1 PE=1 SV=1	7	10	91.6	2.10223e+06	1.68368e+06	High	High
High	Master Protein	Q8VI75	Importin-4 OS=Mus musculus OX=10090 GN=Ipo4 PE=1 SV=1	10	10	119.2	1.43937e+06	1.24787e+06	High	High
High	Master Protein	Q9D892	Inosine triphosphate pyrophosphatase OS=Mus musculus OX=10090 GN=Itpa PE=1 SV=2	34	10	21.9	7.2449e+06	7.77773e+06	High	High
High	Master Protein	P58044	Isopentenyl-diphosphate Delta-isomerase 1 OS=Mus musculus OX=10090 GN=Idi1 PE=1 SV=1	39	10	26.3	1.21169e+07	11382570	High	High
High	Master Protein	Q60749	KH domain-containing, RNA-binding, signal transduction-associated protein 1 OS=Mus musculus OX=10090 GN=Khdrbs1 PE=1 SV=2	16	10	48.3	1.11781e+07	1.00762e+07	High	High
High	Master Protein	Z4YJT3	La-related protein 1 OS=Mus musculus OX=10090 GN=Larp1 PE=1 SV=1	6	10	121.1	2.24761e+06	2.05876e+06	High	High
High	Master Protein	A0A087WSF5	Leucine-rich repeat flightless-interacting protein 1 (Fragment) OS=Mus musculus OX=10090 GN=Lrrfip1 PE=1 SV=1	25	10	37	694520	548845	High	High
High	Master Protein	Q8BFW7	Lipoma-preferred partner homolog OS=Mus musculus OX=10090 GN=Lpp PE=1 SV=1	18	10	65.8	2.80933e+06	3.16728e+06	High	High
High	Master Protein	P16125	L-lactate dehydrogenase B chain OS=Mus musculus OX=10090 GN=Ldhb PE=1 SV=2	23	10	36.5	4.58399e+06	4.08865e+06	High	High
High	Master Protein	Q6PI17	Metalloproteinase inhibitor 2 OS=Mus musculus OX=10090 GN=Timp2 PE=1 SV=1	17	10	24.3	7.58806e+06	8.38714e+06	High	High
High	Master Protein	Q8BPB0	MOB kinase activator 1B OS=Mus musculus OX=10090 GN=Mob1b PE=1 SV=3	33	10	25.1	9.42872e+06	7.97933e+06	High	High
High	Master Protein	A0A286YDF5	Myoferlin OS=Mus musculus OX=10090 GN=Myof PE=1 SV=1	2	10	234.4	8.05124e+06	6.63321e+06	High	High
High	Master Protein	Q9Z2D0	Myotubularin-related protein 9 OS=Mus musculus OX=10090 GN=Mtmr9 PE=1 SV=2	12	10	62.9	3.79219e+06	3.46232e+06	High	High
High	Master Protein	Q571E4	N-acetylgalactosamine-6-sulfatase OS=Mus musculus OX=10090 GN=Galns PE=1 SV=2	13	10	57.6	1.03153e+07	8.86493e+06	High	High
High	Master Protein	Q8VDQ8	NAD-dependent protein deacetylase sirtuin-2 OS=Mus musculus OX=10090 GN=Sirt2 PE=1 SV=2	22	10	43.2	4.60914e+06	2.98989e+06	High	High
High	Master Protein	Q8VBW6	NEDD8-activating enzyme E1 regulatory subunit OS=Mus musculus OX=10090 GN=Nae1 PE=1 SV=1	19	10	60.2	2.30647e+06	1.90314e+06	High	High
High	Master Protein	P61082	NEDD8-conjugating enzyme Ubc12 OS=Mus musculus OX=10090 GN=Ube2m PE=1 SV=1	38	10	20.9	5.49602e+06	4.68093e+06	High	High
High	Master Protein	Q80U93	Nuclear pore complex protein Nup214 OS=Mus musculus OX=10090 GN=Nup214 PE=1 SV=2	5	10	212.8	1.08045e+06	736639	High	High
High	Master Protein	Q921W2	Nucleolysin TIAR OS=Mus musculus OX=10090 GN=Tial1 PE=1 SV=1	27	10	41.5	5.73056e+06	4965329	High	High
High	Master Protein	O70172	Phosphatidylinositol 5-phosphate 4-kinase type-2 alpha OS=Mus musculus OX=10090 GN=Pip4k2a PE=1 SV=1	28	10	46.1	9.49549e+06	7.53049e+06	High	High
High	Master Protein	Q8K212	Phosphofurin acidic cluster sorting protein 1 OS=Mus musculus OX=10090 GN=Pacs1 PE=1 SV=2	12	10	104.8	4.54221e+06	3.8048e+06	High	High
High	Master Protein	Q9EQ32	Phosphoinositide 3-kinase adapter protein 1 OS=Mus musculus OX=10090 GN=Pik3ap1 PE=1 SV=1	11	10	90.9	1.68775e+06	1.11111e+06	High	High
High	Master Protein	O70591	Prefoldin subunit 2 OS=Mus musculus OX=10090 GN=Pfdn2 PE=1 SV=2	45	10	16.5	9846276	8.62609e+06	High	High
High	Master Protein	Q9JKV1	Proteasomal ubiquitin receptor ADRM1 OS=Mus musculus OX=10090 GN=Adrm1 PE=1 SV=2	12	10	42	5.41776e+06	4229509	High	High
High	Master Protein	Q61239	Protein farnesyltransferase/geranylgeranyltransferase type-1 subunit alpha OS=Mus musculus OX=10090 GN=Fnta PE=1 SV=1	19	10	44	3.86738e+06	3.34293e+06	High	High
High	Master Protein	Q9D0B6	Protein PBDC1 OS=Mus musculus OX=10090 GN=Pbdc1 PE=1 SV=1	35	10	22.2	4.24987e+06	3.93706e+06	High	High
High	Master Protein	P49443	Protein phosphatase 1A OS=Mus musculus OX=10090 GN=Ppm1a PE=1 SV=1	22	10	42.4	3.72622e+06	2.97128e+06	High	High
High	Master Protein	P08207	Protein S100-A10 OS=Mus musculus OX=10090 GN=S100a10 PE=1 SV=2	51	10	11.2	3.04385e+07	1.17946e+07	High	High
High	Master Protein	Q05144	Ras-related C3 botulinum toxin substrate 2 OS=Mus musculus OX=10090 GN=Rac2 PE=1 SV=1	31	10	21.4	7.09775e+06	4.8345e+06	High	High
High	Master Protein	Q99K70	Ras-related GTP-binding protein C OS=Mus musculus OX=10090 GN=Rragc PE=1 SV=1	18	10	44.1	3.81238e+06	3.28628e+06	High	High
High	Master Protein	P53994	Ras-related protein Rab-2A OS=Mus musculus OX=10090 GN=Rab2a PE=1 SV=1	38	10	23.5	3.10808e+06	3.1831e+06	High	High
High	Master Protein	Q920A5	Retinoid-inducible serine carboxypeptidase OS=Mus musculus OX=10090 GN=Scpep1 PE=1 SV=2	17	10	50.9	8.30119e+06	8517271	High	High
High	Master Protein	Q9CQR6	Serine/threonine-protein phosphatase 6 catalytic subunit OS=Mus musculus OX=10090 GN=Ppp6c PE=1 SV=1	23	10	35.1	7109344	6.71551e+06	High	High
High	Master Protein	Q8BFS6	Serine/threonine-protein phosphatase CPPED1 OS=Mus musculus OX=10090 GN=Cpped1 PE=1 SV=1	29	10	35.2	3.41887e+06	3.33734e+06	High	High
High	Master Protein	P62315	Small nuclear ribonucleoprotein Sm D1 OS=Mus musculus OX=10090 GN=Snrpd1 PE=1 SV=1	55	10	13.3	2.70425e+07	2.53543e+07	High	High
High	Master Protein	O54941	SWI/SNF-related matrix-associated actin-dependent regulator of chromatin subfamily E member 1 OS=Mus musculus OX=10090 GN=Smarce1 PE=1 SV=1	23	10	46.6	1.13992e+06	1.08277e+06	High	High
High	Master Protein	Q921F2	TAR DNA-binding protein 43 OS=Mus musculus OX=10090 GN=Tardbp PE=1 SV=1	20	10	44.5	1.10955e+07	1.09284e+07	High	High
High	Master Protein	Q8R5A6	TBC1 domain family member 22A OS=Mus musculus OX=10090 GN=Tbc1d22a PE=1 SV=3	12	10	59.3	3.31796e+06	2.05993e+06	High	High
High	Master Protein	O55201	Transcription elongation factor SPT5 OS=Mus musculus OX=10090 GN=Supt5h PE=1 SV=1	10	10	120.6	1.17566e+06	1.17191e+06	High	High
High	Master Protein	Q9D1E6	Tubulin-folding cofactor B OS=Mus musculus OX=10090 GN=Tbcb PE=1 SV=2	29	10	27.4	5.97844e+06	5.36662e+06	High	High
High	Master Protein	A0A5F8MPP4	Ubiquitin carboxyl-terminal hydrolase 25 OS=Mus musculus OX=10090 GN=Usp25 PE=4 SV=1	7	10	128.9	1.13753e+06	1.50306e+06	High	High
High	Master Protein	Q6ZWZ2	Ubiquitin-conjugating enzyme E2 R2 OS=Mus musculus OX=10090 GN=Ube2r2 PE=1 SV=1	20	10	27.1	1.35766e+07	1.37269e+07	High	High
High	Master Protein	Q64339	Ubiquitin-like protein ISG15 OS=Mus musculus OX=10090 GN=Isg15 PE=1 SV=4	43	10	17.9	2.75881e+07	2.73223e+07	High	High
High	Master Protein	O70475	UDP-glucose 6-dehydrogenase OS=Mus musculus OX=10090 GN=Ugdh PE=1 SV=1	20	10	54.8	5.0991e+06	4.62073e+06	High	High
High	Master Protein	E9QKV6	Unconventional myosin-IXb OS=Mus musculus OX=10090 GN=Myo9b PE=1 SV=1	5	10	222.3	1.73351e+06	1.6652e+06	High	High
High	Master Protein	E9QA74	Unconventional myosin-XVIIIa OS=Mus musculus OX=10090 GN=Myo18a PE=1 SV=1	4	10	186.4	1.15541e+06	890264	Peak Found	High
High	Master Protein	Q920Q4	Vacuolar protein sorting-associated protein 16 homolog OS=Mus musculus OX=10090 GN=Vps16 PE=1 SV=3	12	10	94.9	2.60969e+06	1.94511e+06	High	High
High	Master Protein	Q8BYK6	YTH domain-containing family protein 3 OS=Mus musculus OX=10090 GN=Ythdf3 PE=1 SV=2	12	10	63.9	2.7905e+06	3.91875e+06	High	High
High	Master Protein	P10852	4F2 cell-surface antigen heavy chain OS=Mus musculus OX=10090 GN=Slc3a2 PE=1 SV=1	11	9	58.3	2.85677e+06	3.03009e+06	High	High
High	Master Protein	Q9CXW4	60S ribosomal protein L11 OS=Mus musculus OX=10090 GN=Rpl11 PE=1 SV=4	25	9	20.2	1.2537e+07	1.23435e+07	High	High
High	Master Protein	P35980	60S ribosomal protein L18 OS=Mus musculus OX=10090 GN=Rpl18 PE=1 SV=3	30	9	21.6	5.09948e+06	4.33049e+06	High	High
High	Master Protein	Q9D2R0	Acetoacetyl-CoA synthetase OS=Mus musculus OX=10090 GN=Aacs PE=1 SV=1	8	9	75.2	3.41545e+06	3.24473e+06	High	High
High	Master Protein	P97822	Acidic leucine-rich nuclear phosphoprotein 32 family member E OS=Mus musculus OX=10090 GN=Anp32e PE=1 SV=2	20	9	29.6	1.16676e+07	1.06533e+07	High	High
High	Master Protein	Q9WTL7	Acyl-protein thioesterase 2 OS=Mus musculus OX=10090 GN=Lypla2 PE=1 SV=1	32	9	24.8	1.50873e+07	1.07769e+07	High	High
High	Master Protein	P51569	Alpha-galactosidase A OS=Mus musculus OX=10090 GN=Gla PE=1 SV=1	19	9	47.6	4.69568e+06	5.27185e+06	High	High
High	Master Protein	Q9QWR8	Alpha-N-acetylgalactosaminidase OS=Mus musculus OX=10090 GN=Naga PE=1 SV=2	16	9	47.2	5.24455e+06	5.07881e+06	High	High
High	Master Protein	A0A2I3BQZ9	Amyloid-beta A4 protein OS=Mus musculus OX=10090 GN=App PE=1 SV=1	9	9	84.6	4.33673e+06	5851791	High	High
High	Master Protein	P07356	Annexin A2 OS=Mus musculus OX=10090 GN=Anxa2 PE=1 SV=2	22	9	38.7	2.37404e+06	2.47335e+06	High	High
High	Master Protein	P48036	Annexin A5 OS=Mus musculus OX=10090 GN=Anxa5 PE=1 SV=1	15	9	35.7	3.55649e+06	2.78805e+06	High	High
High	Master Protein	Q9DCR2	AP-3 complex subunit sigma-1 OS=Mus musculus OX=10090 GN=Ap3s1 PE=1 SV=2	28	9	21.7	3.26756e+06	2.4482e+06	High	High
High	Master Protein	Q60739	BAG family molecular chaperone regulator 1 OS=Mus musculus OX=10090 GN=Bag1 PE=1 SV=3	22	9	39.7	3.60477e+06	3.24201e+06	High	High
High	Master Protein	Q61335	B-cell receptor-associated protein 31 OS=Mus musculus OX=10090 GN=Bcap31 PE=1 SV=4	17	9	27.9	6.0446e+06	6.03114e+06	High	High
High	Master Protein	Q3TCJ1	BRISC complex subunit Abraxas 2 OS=Mus musculus OX=10090 GN=Abraxas2 PE=1 SV=1	21	9	46.9	2.54352e+06	2.4171e+06	High	High
High	Master Protein	Q6ZQ08	CCR4-NOT transcription complex subunit 1 OS=Mus musculus OX=10090 GN=Cnot1 PE=1 SV=2	4	9	266.6	1.74387e+06	1.56624e+06	High	High
High	Master Protein	Q9EQG9	Ceramide transfer protein OS=Mus musculus OX=10090 GN=Cert PE=1 SV=1	13	9	71.1	2.89016e+06	2.45986e+06	High	High
High	Master Protein	E9QMV2	Costars family protein ABRACL OS=Mus musculus OX=10090 GN=Abracl PE=1 SV=1	78	9	9.1	42217763	3.71982e+07	High	High
High	Master Protein	E9PYH2	Cytosolic acyl coenzyme A thioester hydrolase OS=Mus musculus OX=10090 GN=Acot7 PE=1 SV=1	18	9	42.8	7.31576e+06	6.96726e+06	High	High
High	Master Protein	O35215	D-dopachrome decarboxylase OS=Mus musculus OX=10090 GN=Ddt PE=1 SV=3	45	9	13.1	1.67512e+07	1.50919e+07	High	High
High	Master Protein	A2AF67	Dedicator of cytokinesis protein 11 OS=Mus musculus OX=10090 GN=Dock11 PE=1 SV=1	5	9	218.1	1.50909e+06	940203	High	High
High	Master Protein	Q8CDG3	Deubiquitinating protein VCIP135 OS=Mus musculus OX=10090 GN=Vcpip1 PE=1 SV=1	7	9	134.4	1.45616e+06	1.13996e+06	High	High
High	Master Protein	O08749	Dihydrolipoyl dehydrogenase, mitochondrial OS=Mus musculus OX=10090 GN=Dld PE=1 SV=2	17	9	54.2	3.43578e+06	2.20429e+06	High	High
High	Master Protein	P25206	DNA replication licensing factor MCM3 OS=Mus musculus OX=10090 GN=Mcm3 PE=1 SV=2	10	9	91.5	2.6541e+06	2.03254e+06	High	High
High	Master Protein	A0A0R4J0V5	DNA-directed RNA polymerase subunit OS=Mus musculus OX=10090 GN=Polr2a PE=1 SV=1	3	9	213.3	884248	537006	High	High
High	Master Protein	D4AFX7	DnaJ heat shock protein family (Hsp40) member C13 OS=Mus musculus OX=10090 GN=Dnajc13 PE=1 SV=1	4	9	254.9	1.13113e+06	1.34643e+06	High	High
High	Master Protein	Q9Z0Y1	Dynactin subunit 3 OS=Mus musculus OX=10090 GN=Dctn3 PE=1 SV=2	42	9	21	3.86365e+06	3.73264e+06	High	High
High	Master Protein	Q8CBY8	Dynactin subunit 4 OS=Mus musculus OX=10090 GN=Dctn4 PE=1 SV=1	16	9	53	2.50682e+06	2.10266e+06	High	High
High	Master Protein	A0A1D5RMC1	Dynein light intermediate chain (Fragment) OS=Mus musculus OX=10090 GN=Dync1li2 PE=1 SV=1	17	9	45.3	2.49937e+06	2.35195e+06	High	High
High	Master Protein	Q61510	E3 ubiquitin/ISG15 ligase TRIM25 OS=Mus musculus OX=10090 GN=Trim25 PE=1 SV=2	11	9	71.7	2.75624e+06	2.66579e+06	High	High
High	Master Protein	E9PVA8	eIF-2-alpha kinase activator GCN1 OS=Mus musculus OX=10090 GN=Gcn1 PE=1 SV=1	4	9	292.8	1.69512e+06	1.425e+06	High	High
High	Master Protein	P57759	Endoplasmic reticulum resident protein 29 OS=Mus musculus OX=10090 GN=Erp29 PE=1 SV=2	23	9	28.8	4.32825e+06	3.9721e+06	High	High
High	Master Protein	P84089	Enhancer of rudimentary homolog OS=Mus musculus OX=10090 GN=Erh PE=1 SV=1	34	9	12.3	1.92686e+07	1.90433e+07	High	High
High	Master Protein	P48024	Eukaryotic translation initiation factor 1 OS=Mus musculus OX=10090 GN=Eif1 PE=1 SV=2	44	9	12.7	6.80664e+06	7.45049e+06	High	High
High	Master Protein	Q3UQN2	F-BAR domain only protein 2 OS=Mus musculus OX=10090 GN=Fcho2 PE=1 SV=1	12	9	88.7	2.93363e+06	2.33547e+06	High	High
High	Master Protein	Q9CQI3	Glia maturation factor beta OS=Mus musculus OX=10090 GN=Gmfb PE=1 SV=3	42	9	16.7	1.45035e+07	1.28916e+07	High	High
High	Master Protein	Q8CAA7	Glucose 1,6-bisphosphate synthase OS=Mus musculus OX=10090 GN=Pgm2l1 PE=1 SV=1	13	9	70.2	2.93147e+06	2.66922e+06	High	High
High	Master Protein	Q8CHP8	Glycerol-3-phosphate phosphatase OS=Mus musculus OX=10090 GN=Pgp PE=1 SV=1	23	9	34.5	8.27792e+06	6.77555e+06	High	High
High	Master Protein	Q8VDM6	Heterogeneous nuclear ribonucleoprotein U-like protein 1 OS=Mus musculus OX=10090 GN=Hnrnpul1 PE=1 SV=1	8	9	95.9	3.46784e+06	2.70247e+06	High	High
High	Master Protein	Q99P31	Hsp70-binding protein 1 OS=Mus musculus OX=10090 GN=Hspbp1 PE=1 SV=1	20	9	39.1	2.50601e+06	2.52321e+06	High	High
High	Master Protein	Q61249	Immunoglobulin-binding protein 1 OS=Mus musculus OX=10090 GN=Igbp1 PE=1 SV=1	23	9	38.9	3.18601e+06	2.69382e+06	High	High
High	Master Protein	Q9Z0R6	Intersectin-2 OS=Mus musculus OX=10090 GN=Itsn2 PE=1 SV=2	4	9	188.8	2.04133e+06	2.36567e+06	High	High
High	Master Protein	P97825	Jupiter microtubule associated homolog 1 OS=Mus musculus OX=10090 GN=Jpt1 PE=1 SV=3	38	9	16.1	3.72716e+06	5.77338e+06	High	High
High	Master Protein	Q8BGB5	LIM domain-containing protein 2 OS=Mus musculus OX=10090 GN=Limd2 PE=1 SV=1	34	9	14.2	2.30062e+06	2.10589e+06	High	High
High	Master Protein	P17439	Lysosomal acid glucosylceramidase OS=Mus musculus OX=10090 GN=Gba PE=1 SV=1	14	9	57.6	2.80689e+06	2.71782e+06	High	High
High	Master Protein	E0CZ22	Maestro heat-like repeat family member 1 OS=Mus musculus OX=10090 GN=Mroh1 PE=1 SV=1	4	9	181.7	1.12156e+06	647642	High	High
High	Master Protein	A2AAV6	Meteorin-like protein (Fragment) OS=Mus musculus OX=10090 GN=Metrnl PE=1 SV=1	25	9	24.1	6.7078e+06	9.25697e+06	High	High
High	Master Protein	O08663	Methionine aminopeptidase 2 OS=Mus musculus OX=10090 GN=Metap2 PE=1 SV=1	22	9	52.9	3.71456e+06	3.00314e+06	High	High
High	Master Protein	A0A0R4J0B4	N-acylneuraminate cytidylyltransferase OS=Mus musculus OX=10090 GN=Cmas PE=1 SV=1	15	9	48	4.99563e+06	5772299	High	High
High	Master Protein	P29595	NEDD8 OS=Mus musculus OX=10090 GN=Nedd8 PE=1 SV=2	52	9	9	8.73248e+06	6.19907e+06	High	High
High	Master Protein	Q91YP2	Neurolysin, mitochondrial OS=Mus musculus OX=10090 GN=Nln PE=1 SV=1	12	9	80.4	2.66319e+06	2.85944e+06	High	High
High	Master Protein	Q9Z0J0	NPC intracellular cholesterol transporter 2 OS=Mus musculus OX=10090 GN=Npc2 PE=1 SV=1	38	9	16.4	5.72054e+07	6.30204e+07	High	High
High	Master Protein	P60670	Nuclear protein localization protein 4 homolog OS=Mus musculus OX=10090 GN=Nploc4 PE=1 SV=3	13	9	68	2.82915e+06	2.18819e+06	High	High
High	Master Protein	Q80XU3	Nuclear ubiquitous casein and cyclin-dependent kinase substrate 1 OS=Mus musculus OX=10090 GN=Nucks1 PE=1 SV=1	36	9	26.3	2.77208e+06	2.77706e+06	High	High
High	Master Protein	Q9D6Z1	Nucleolar protein 56 OS=Mus musculus OX=10090 GN=Nop56 PE=1 SV=2	13	9	64.4	3.49422e+06	2.2094e+06	High	High
High	Master Protein	F8VQ28	Paxillin OS=Mus musculus OX=10090 GN=Pxn PE=1 SV=1	16	9	64.5	2.30126e+06	1.62843e+06	High	High
High	Master Protein	Q9Z0G0	PDZ domain-containing protein GIPC1 OS=Mus musculus OX=10090 GN=Gipc1 PE=1 SV=1	34	9	36.1	1.59352e+06	1.76222e+06	High	High
High	Master Protein	P26883	Peptidyl-prolyl cis-trans isomerase FKBP1A OS=Mus musculus OX=10090 GN=Fkbp1a PE=1 SV=2	71	9	11.9	3.92623e+07	3.84284e+07	High	High
High	Master Protein	Q9D0W5	Peptidyl-prolyl cis-trans isomerase-like 1 OS=Mus musculus OX=10090 GN=Ppil1 PE=1 SV=1	31	9	18.2	2.81402e+07	2.9381e+07	High	High
High	Master Protein	Q8C0L6	Peroxisomal N(1)-acetyl-spermine/spermidine oxidase OS=Mus musculus OX=10090 GN=Paox PE=1 SV=3	17	9	55.4	3.16826e+06	2.39213e+06	High	High
High	Master Protein	Q3UDT3	Phosphatidylinositol 4,5-bisphosphate 3-kinase catalytic subunit OS=Mus musculus OX=10090 GN=Pik3cd PE=1 SV=1	7	9	119.8	2.43397e+06	2.1209e+06	High	High
High	Master Protein	Q8VD65	Phosphoinositide 3-kinase regulatory subunit 4 OS=Mus musculus OX=10090 GN=Pik3r4 PE=1 SV=3	6	9	152.5	1.52015e+06	832738	High	High
High	Master Protein	Q61205	Platelet-activating factor acetylhydrolase IB subunit gamma OS=Mus musculus OX=10090 GN=Pafah1b3 PE=1 SV=1	52	9	25.8	3.44986e+06	3.29343e+06	High	High
High	Master Protein	Q922V4	Pleiotropic regulator 1 OS=Mus musculus OX=10090 GN=Plrg1 PE=1 SV=1	20	9	56.9	2.95474e+06	2.5562e+06	High	High
High	Master Protein	B2RXS4	Plexin-B2 OS=Mus musculus OX=10090 GN=Plxnb2 PE=1 SV=1	5	9	206.1	1.73852e+06	1.68596e+06	High	High
High	Master Protein	Q6PB93	Polypeptide N-acetylgalactosaminyltransferase 2 OS=Mus musculus OX=10090 GN=Galnt2 PE=1 SV=1	15	9	64.5	2.61061e+06	2.79706e+06	High	High
High	Master Protein	Q6PAV2	Probable E3 ubiquitin-protein ligase HERC4 OS=Mus musculus OX=10090 GN=Herc4 PE=1 SV=2	8	9	118.3	1.87123e+06	1.58013e+06	High	High
High	Master Protein	P49935	Pro-cathepsin H OS=Mus musculus OX=10090 GN=Ctsh PE=1 SV=2	15	9	37.1	5.52607e+06	5.38388e+06	High	High
High	Master Protein	Q5SSW2	Proteasome activator complex subunit 4 OS=Mus musculus OX=10090 GN=Psme4 PE=1 SV=1	4	9	211.1	1.19121e+06	997907	High	High
High	Master Protein	Q3TGF2	Protein FAM107B OS=Mus musculus OX=10090 GN=Fam107b PE=1 SV=2	37	9	15.6	2.7049e+06	2.74876e+06	High	High
High	Master Protein	A0A1W2P750	Protein phosphatase 1 regulatory subunit 12A (Fragment) OS=Mus musculus OX=10090 GN=Ppp1r12a PE=1 SV=1	18	9	57.9	41606.9	34130.3	High	Peak Found
High	Master Protein	Q3UMT1	Protein phosphatase 1 regulatory subunit 12C OS=Mus musculus OX=10090 GN=Ppp1r12c PE=1 SV=1	8	9	84.6	1.4721e+06	1.18121e+06	High	High
High	Master Protein	Q60953	Protein PML OS=Mus musculus OX=10090 GN=Pml PE=1 SV=3	8	9	98.2	2.94167e+06	2.22586e+06	High	High
High	Master Protein	G3UX48	Protein PRRC2A OS=Mus musculus OX=10090 GN=Prrc2a PE=1 SV=1	6	9	219.3	461261	626051	High	High
High	Master Protein	P21981	Protein-glutamine gamma-glutamyltransferase 2 OS=Mus musculus OX=10090 GN=Tgm2 PE=1 SV=4	12	9	77	3.96974e+06	3.08173e+06	High	High
High	Master Protein	D3Z6I4	Quinone oxidoreductase-like protein 1 OS=Mus musculus OX=10090 GN=Cryzl1 PE=1 SV=1	26	9	37	1.24473e+06	1.42842e+06	High	High
High	Master Protein	P34022	Ran-specific GTPase-activating protein OS=Mus musculus OX=10090 GN=Ranbp1 PE=1 SV=2	45	9	23.6	2.2641e+07	2.06969e+07	High	High
High	Master Protein	P61021	Ras-related protein Rab-5B OS=Mus musculus OX=10090 GN=Rab5b PE=1 SV=1	26	9	23.7	162887	130334	High	High
High	Master Protein	Q8K4I3	Rho guanine nucleotide exchange factor 6 OS=Mus musculus OX=10090 GN=Arhgef6 PE=1 SV=1	9	9	87	3.75805e+06	2.93863e+06	High	High
High	Master Protein	A0A0R4J0X8	Rho guanine nucleotide exchange factor 7 OS=Mus musculus OX=10090 GN=Arhgef7 PE=1 SV=1	15	9	73	3.1973e+06	2.92843e+06	High	High
High	Master Protein	P35550	rRNA 2'-O-methyltransferase fibrillarin OS=Mus musculus OX=10090 GN=Fbl PE=1 SV=2	26	9	34.3	3.91552e+06	3.62101e+06	High	High
High	Master Protein	Q8K352	SAM and SH3 domain-containing protein 3 OS=Mus musculus OX=10090 GN=Sash3 PE=1 SV=2	46	9	41.6	9.17197e+06	9.60568e+06	High	High
High	Master Protein	Q8CBA2	Schlafen family member 5 OS=Mus musculus OX=10090 GN=Slfn5 PE=1 SV=2	9	9	100.8	4.49383e+06	3.04632e+06	High	High
High	Master Protein	Q6NZC7	SEC23-interacting protein OS=Mus musculus OX=10090 GN=Sec23ip PE=1 SV=2	10	9	110.7	2.68261e+06	2.43729e+06	High	High
High	Master Protein	E9PUK6	Serine/arginine repetitive matrix protein 1 OS=Mus musculus OX=10090 GN=Srrm1 PE=1 SV=1	13	9	104.2	2.49993e+06	1.83982e+06	High	High
High	Master Protein	Q8BL97	Serine/arginine-rich splicing factor 7 OS=Mus musculus OX=10090 GN=Srsf7 PE=1 SV=1	19	9	30.8	1.21893e+07	1.05458e+07	High	High
High	Master Protein	Q8K1R7	Serine/threonine-protein kinase Nek9 OS=Mus musculus OX=10090 GN=Nek9 PE=1 SV=2	10	9	107.1	1.64533e+06	1.40654e+06	High	High
High	Master Protein	E9Q0Y4	Signal-induced proliferation-associated protein 1 OS=Mus musculus OX=10090 GN=Sipa1 PE=1 SV=1	12	9	112.2	2.07877e+06	2.02295e+06	High	High
High	Master Protein	G3UWX9	Small ubiquitin-related modifier 3 OS=Mus musculus OX=10090 GN=Sumo3 PE=4 SV=1	26	9	10.7	2.20086e+07	2.02842e+07	High	High
High	Master Protein	P38647	Stress-70 protein, mitochondrial OS=Mus musculus OX=10090 GN=Hspa9 PE=1 SV=3	11	9	73.4	2.42133e+06	1.54057e+06	High	High
High	Master Protein	O09044	Synaptosomal-associated protein 23 OS=Mus musculus OX=10090 GN=Snap23 PE=1 SV=1	42	9	23.2	2.39398e+06	2.12759e+06	High	High
High	Master Protein	O35295	Transcriptional activator protein Pur-beta OS=Mus musculus OX=10090 GN=Purb PE=1 SV=3	23	9	33.9	3.48873e+06	3.74382e+06	High	High
High	Master Protein	A2BDW0	Tyrosine-protein kinase OS=Mus musculus OX=10090 GN=Btk PE=1 SV=1	14	9	56	2.41052e+06	2.32585e+06	High	High
High	Master Protein	Q9Z315	U4/U6.U5 tri-snRNP-associated protein 1 OS=Mus musculus OX=10090 GN=Sart1 PE=1 SV=1	12	9	90.8	459694	905336	High	High
High	Master Protein	Q8C7R4	Ubiquitin-like modifier-activating enzyme 6 OS=Mus musculus OX=10090 GN=Uba6 PE=1 SV=1	7	9	117.9	1.97877e+06	1.72825e+06	High	High
High	Master Protein	P97390	Vacuolar protein sorting-associated protein 45 OS=Mus musculus OX=10090 GN=Vps45 PE=1 SV=1	13	9	65	2.77874e+06	2.01456e+06	High	High
High	Master Protein	I1E4X5	VPS35 endosomal protein sorting factor-like OS=Mus musculus OX=10090 GN=Vps35l PE=1 SV=1	8	9	111.9	2.70312e+06	1.47776e+06	High	High
High	Master Protein	Q9CR51	V-type proton ATPase subunit G 1 OS=Mus musculus OX=10090 GN=Atp6v1g1 PE=1 SV=3	40	9	13.7	9.80641e+06	8.31194e+06	High	High
High	Master Protein	Q9R1Q9	V-type proton ATPase subunit S1 OS=Mus musculus OX=10090 GN=Atp6ap1 PE=1 SV=1	15	9	51	6.26509e+06	6.79599e+06	High	High
High	Master Protein	Q8VDD8	WASH complex subunit 1 OS=Mus musculus OX=10090 GN=Washc1 PE=1 SV=1	19	9	51.6	2.86161e+06	3.17522e+06	High	High
High	Master Protein	K4DI77	WD repeat-containing protein 81 (Fragment) OS=Mus musculus OX=10090 GN=Wdr81 PE=1 SV=1	6	9	211.8	2.51365e+06	1.41211e+06	High	High
High	Master Protein	P62264	40S ribosomal protein S14 OS=Mus musculus OX=10090 GN=Rps14 PE=1 SV=3	36	8	16.3	7.97015e+06	6.76666e+06	High	High
High	Master Protein	P60867	40S ribosomal protein S20 OS=Mus musculus OX=10090 GN=Rps20 PE=1 SV=1	31	8	13.4	1.98656e+07	1.77311e+07	High	High
High	Master Protein	P62242	40S ribosomal protein S8 OS=Mus musculus OX=10090 GN=Rps8 PE=1 SV=2	29	8	24.2	8.45709e+06	7.40531e+06	High	High
High	Master Protein	A0A1D5RLW5	60S ribosomal protein L18a OS=Mus musculus OX=10090 GN=Rpl18a PE=1 SV=1	27	8	17.4	3.13994e+06	3.07795e+06	High	High
High	Master Protein	P62889	60S ribosomal protein L30 OS=Mus musculus OX=10090 GN=Rpl30 PE=1 SV=2	66	8	12.8	4.53069e+06	4.48338e+06	High	High
High	Master Protein	O55142	60S ribosomal protein L35a OS=Mus musculus OX=10090 GN=Rpl35a PE=1 SV=2	32	8	12.5	3.68997e+06	3.48201e+06	High	High
High	Master Protein	Q9JJI8	60S ribosomal protein L38 OS=Mus musculus OX=10090 GN=Rpl38 PE=1 SV=3	50	8	8.2	1.15745e+07	8.75459e+06	High	High
High	Master Protein	Q8BVU5	ADP-ribose pyrophosphatase, mitochondrial OS=Mus musculus OX=10090 GN=Nudt9 PE=1 SV=1	17	8	38.6	1.33004e+06	2.15357e+06	High	High
High	Master Protein	P62743	AP-2 complex subunit sigma OS=Mus musculus OX=10090 GN=Ap2s1 PE=1 SV=1	33	8	17	9.91555e+06	8.44381e+06	High	High
High	Master Protein	Q8VBT6	Apolipoprotein B receptor OS=Mus musculus OX=10090 GN=Apobr PE=1 SV=1	11	8	102.6	868212	914446	High	High
High	Master Protein	E9PY16	ArfGAP with dual PH domains 1 OS=Mus musculus OX=10090 GN=Adap1 PE=1 SV=1	24	8	43.3	2.23918e+06	2.46692e+06	High	High
High	Master Protein	Q6NZM8	Bifunctional 3'-phosphoadenosine 5'-phosphosulfate synthase 1 OS=Mus musculus OX=10090 GN=Papss1 PE=1 SV=1	12	8	68.5	2.66943e+06	2.78006e+06	High	High
High	Master Protein	P56380	Bis(5'-nucleosyl)-tetraphosphatase [asymmetrical] OS=Mus musculus OX=10090 GN=Nudt2 PE=1 SV=3	44	8	17	2.70778e+06	3.03214e+06	High	High
High	Master Protein	Q8BGS2	BolA-like protein 2 OS=Mus musculus OX=10090 GN=Bola2 PE=1 SV=1	53	8	10.2	3.08593e+06	3.04169e+06	High	High
High	Master Protein	O88587	Catechol O-methyltransferase OS=Mus musculus OX=10090 GN=Comt PE=1 SV=2	25	8	29.5	5.13386e+06	4.62918e+06	High	High
High	Master Protein	P51670	C-C motif chemokine 9 OS=Mus musculus OX=10090 GN=Ccl9 PE=1 SV=1	34	8	13.9	9.00282e+06	1.26771e+07	High	High
High	Master Protein	Q62192	CD180 antigen OS=Mus musculus OX=10090 GN=Cd180 PE=1 SV=2	15	8	74.3	1.98526e+06	1.71358e+06	High	High
High	Master Protein	Q9D8B3	Charged multivesicular body protein 4b OS=Mus musculus OX=10090 GN=Chmp4b PE=1 SV=2	27	8	24.9	1.14189e+07	8.10378e+06	High	High
High	Master Protein	Q923F1	Chloride channel, nucleotide-sensitive, 1A OS=Mus musculus OX=10090 GN=Clns1a PE=1 SV=1	36	8	26.5	5.05547e+06	4.37062e+06	High	High
High	Master Protein	Q8R5L1	Complement component 1 Q subcomponent-binding protein, mitochondrial OS=Mus musculus OX=10090 GN=C1qbp PE=1 SV=1	32	8	31	2.46396e+06	2.28435e+06	High	High
High	Master Protein	O08997	Copper transport protein ATOX1 OS=Mus musculus OX=10090 GN=Atox1 PE=1 SV=1	59	8	7.3	3.42871e+07	2.92656e+07	High	High
High	Master Protein	A0A0J9YU62	C-terminal-binding protein 1 OS=Mus musculus OX=10090 GN=Ctbp1 PE=1 SV=1	16	8	46.5	5.45241e+06	3.21319e+06	High	High
High	Master Protein	Q99LJ0	CTTNBP2 N-terminal-like protein OS=Mus musculus OX=10090 GN=Cttnbp2nl PE=1 SV=1	9	8	69.8	705240	590736	High	High
High	Master Protein	Q8BHG2	CXXC motif containing zinc binding protein OS=Mus musculus OX=10090 GN=Czib PE=1 SV=1	44	8	18	4.78333e+06	4.77934e+06	High	High
High	Master Protein	A0A0J9YTU3	Cytospin-B OS=Mus musculus OX=10090 GN=Specc1 PE=1 SV=1	8	8	117	1.30268e+06	1.19039e+06	High	High
High	Master Protein	Q9JII5	DAZ-associated protein 1 OS=Mus musculus OX=10090 GN=Dazap1 PE=1 SV=2	18	8	43.2	6.76191e+06	5.93354e+06	High	High
High	Master Protein	P10518	Delta-aminolevulinic acid dehydratase OS=Mus musculus OX=10090 GN=Alad PE=1 SV=1	33	8	36	2.95135e+06	2.65734e+06	High	High
High	Master Protein	Q9CQJ6	Density-regulated protein OS=Mus musculus OX=10090 GN=Denr PE=1 SV=1	26	8	22.2	3.40007e+06	3.24888e+06	High	High
High	Master Protein	Q8R242	Di-N-acetylchitobiase OS=Mus musculus OX=10090 GN=Ctbs PE=1 SV=2	18	8	41.3	4.96536e+06	3.556e+06	High	High
High	Master Protein	Q99JF5	Diphosphomevalonate decarboxylase OS=Mus musculus OX=10090 GN=Mvd PE=1 SV=2	19	8	44	1.74787e+06	1.8078e+06	High	High
High	Master Protein	P49717	DNA replication licensing factor MCM4 OS=Mus musculus OX=10090 GN=Mcm4 PE=1 SV=1	10	8	96.7	2.55237e+06	2.38968e+06	High	High
High	Master Protein	P63037	DnaJ homolog subfamily A member 1 OS=Mus musculus OX=10090 GN=Dnaja1 PE=1 SV=1	20	8	44.8	2.29577e+06	1.62793e+06	High	High
High	Master Protein	Q9D6N5	Dr1-associated corepressor OS=Mus musculus OX=10090 GN=Drap1 PE=1 SV=3	20	8	22.3	4.20591e+06	3.97523e+06	High	High
High	Master Protein	Q7TMY8	E3 ubiquitin-protein ligase HUWE1 OS=Mus musculus OX=10090 GN=Huwe1 PE=1 SV=5	2	8	482.3	970230	1.10492e+06	High	High
High	Master Protein	Q9D1Q6	Endoplasmic reticulum resident protein 44 OS=Mus musculus OX=10090 GN=Erp44 PE=1 SV=1	20	8	46.8	1.48979e+06	1.18652e+06	High	High
High	Master Protein	Q9JMG1	Endothelial differentiation-related factor 1 OS=Mus musculus OX=10090 GN=Edf1 PE=1 SV=1	31	8	16.4	5.02474e+06	4.89782e+06	High	High
High	Master Protein	P54731	FAS-associated factor 1 OS=Mus musculus OX=10090 GN=Faf1 PE=1 SV=2	12	8	73.8	2.31817e+06	2.42598e+06	High	High
High	Master Protein	A0A0G2JFP4	Ferric-chelate reductase 1 OS=Mus musculus OX=10090 GN=Frrs1 PE=1 SV=1	6	8	66	4.27495e+06	3.85103e+06	High	High
High	Master Protein	Q9JHK4	Geranylgeranyl transferase type-2 subunit alpha OS=Mus musculus OX=10090 GN=Rabggta PE=1 SV=1	10	8	64.9	2.38208e+06	2.00686e+06	High	High
High	Master Protein	P03995	Glial fibrillary acidic protein OS=Mus musculus OX=10090 GN=Gfap PE=1 SV=4	4	8	49.9	1.18621e+07	11534141	High	High
High	Master Protein	Q8BFQ8	Glutamine amidotransferase-like class 1 domain-containing protein 1 OS=Mus musculus OX=10090 GN=Gatd1 PE=1 SV=1	30	8	23.3	4.97345e+06	4734000	High	High
High	Master Protein	Q9QUH0	Glutaredoxin-1 OS=Mus musculus OX=10090 GN=Glrx PE=1 SV=3	50	8	11.9	3.36479e+07	3.42981e+07	High	High
High	Master Protein	Q99JX3	Golgi reassembly-stacking protein 2 OS=Mus musculus OX=10090 GN=Gorasp2 PE=1 SV=3	16	8	47	2.17765e+06	2.20543e+06	High	High
High	Master Protein	Q8BMP6	Golgi resident protein GCP60 OS=Mus musculus OX=10090 GN=Acbd3 PE=1 SV=3	16	8	60.1	2.26795e+06	2.1568e+06	High	High
High	Master Protein	E9QP99	Golgin subfamily A member 3 OS=Mus musculus OX=10090 GN=Golga3 PE=1 SV=1	6	8	167.2	950587	949678	High	High
High	Master Protein	Q9CX86	Heterogeneous nuclear ribonucleoprotein A0 OS=Mus musculus OX=10090 GN=Hnrnpa0 PE=1 SV=1	20	8	30.5	5.20402e+06	3.68858e+06	High	High
High	Master Protein	O35343	Importin subunit alpha-3 OS=Mus musculus OX=10090 GN=Kpna4 PE=1 SV=1	14	8	57.9	2.24734e+06	2.17648e+06	High	High
High	Master Protein	H3BLB7	Insulin-like growth factor-binding protein 4 OS=Mus musculus OX=10090 GN=Igfbp4 PE=1 SV=1	35	8	18	1.2509e+07	1.30242e+07	High	High
High	Master Protein	F6Z6C6	Interferon regulatory factor 5 OS=Mus musculus OX=10090 GN=Irf5 PE=1 SV=2	14	8	55.4	2.80952e+06	2.30876e+06	High	High
High	Master Protein	Q9CX00	IST1 homolog OS=Mus musculus OX=10090 GN=Ist1 PE=1 SV=1	13	8	39.4	6.19927e+06	4.64776e+06	High	High
High	Master Protein	A0A0G2JFV5	Leucine-rich repeat flightless-interacting protein 2 OS=Mus musculus OX=10090 GN=Lrrfip2 PE=1 SV=1	13	8	49.7	580518	268323	High	High
High	Master Protein	Q99N69	Leupaxin OS=Mus musculus OX=10090 GN=Lpxn PE=1 SV=2	26	8	43.5	4.7856e+06	3.67169e+06	High	High
High	Master Protein	Q9D358	Low molecular weight phosphotyrosine protein phosphatase OS=Mus musculus OX=10090 GN=Acp1 PE=1 SV=3	28	8	18.2	9.52382e+06	8.59945e+06	High	High
High	Master Protein	Q60787	Lymphocyte cytosolic protein 2 OS=Mus musculus OX=10090 GN=Lcp2 PE=1 SV=2	13	8	60.2	4.37513e+06	3.46893e+06	High	High
High	Master Protein	Q7TMR0	Lysosomal Pro-X carboxypeptidase OS=Mus musculus OX=10090 GN=Prcp PE=1 SV=2	12	8	55	1.50157e+07	1.2552e+07	High	High
High	Master Protein	Q3TQP6	Malic enzyme OS=Mus musculus OX=10090 GN=Me1 PE=1 SV=1	15	8	61.4	3.29397e+06	3.50394e+06	High	High
High	Master Protein	Q9JHI0	Matrix metalloproteinase-19 OS=Mus musculus OX=10090 GN=Mmp19 PE=2 SV=1	11	8	59.1	1.60044e+06	2.04405e+06	High	High
High	Master Protein	A2A7F7	Methylenetetrahydrofolate reductase OS=Mus musculus OX=10090 GN=Mthfr PE=1 SV=1	9	8	78.9	2.8875e+06	1.85172e+06	High	High
High	Master Protein	P11672	Neutrophil gelatinase-associated lipocalin OS=Mus musculus OX=10090 GN=Lcn2 PE=1 SV=1	16	8	22.9	1.16988e+07	1.04444e+07	High	High
High	Master Protein	G5E884	Non-specific serine/threonine protein kinase OS=Mus musculus OX=10090 GN=Pak1 PE=1 SV=1	13	8	60.6	670813	456041	High	High
High	Master Protein	Q8CII5	Nucleolysin TIA-1 OS=Mus musculus OX=10090 GN=Tia1 PE=1 SV=1	19	8	31.6	330170	201153	High	High
High	Master Protein	Q9D0J8	Parathymosin OS=Mus musculus OX=10090 GN=Ptms PE=1 SV=3	24	8	11.4	8.04274e+06	6.77518e+06	High	High
High	Master Protein	Q8BVF2	Phosducin-like protein 3 OS=Mus musculus OX=10090 GN=Pdcl3 PE=1 SV=1	18	8	27.6	9.7163e+06	7.94342e+06	High	High
High	Master Protein	Q5SV41	Phosphatidylcholine transfer protein OS=Mus musculus OX=10090 GN=Pctp PE=1 SV=1	20	8	24.6	2.40332e+06	2.77676e+06	High	High
High	Master Protein	A0A0R4J0B2	Phospholipase B-like OS=Mus musculus OX=10090 GN=Plbd1 PE=1 SV=1	9	8	63	3.07635e+06	1.7947e+06	High	High
High	Master Protein	Q9JHK5	Pleckstrin OS=Mus musculus OX=10090 GN=Plek PE=1 SV=1	27	8	39.9	7.30036e+06	8.68764e+06	High	High
High	Master Protein	Q61183	Poly(A) polymerase alpha OS=Mus musculus OX=10090 GN=Papola PE=1 SV=4	10	8	82.3	1.75846e+06	1.73803e+06	High	High
High	Master Protein	Q8CCS6	Polyadenylate-binding protein 2 OS=Mus musculus OX=10090 GN=Pabpn1 PE=1 SV=3	20	8	32.3	3.94365e+06	1.60127e+06	High	High
High	Master Protein	Q99NF7	Ppm1b protein OS=Mus musculus OX=10090 GN=Ppm1b PE=1 SV=1	11	8	52.1	784486	621984	High	High
High	Master Protein	Q9WU28	Prefoldin subunit 5 OS=Mus musculus OX=10090 GN=Pfdn5 PE=1 SV=1	31	8	17.3	4.54063e+06	4.26805e+06	High	High
High	Master Protein	Q8VDQ1	Prostaglandin reductase 2 OS=Mus musculus OX=10090 GN=Ptgr2 PE=1 SV=2	22	8	38	2.3239e+06	1.1636e+06	High	High
High	Master Protein	P61290	Proteasome activator complex subunit 3 OS=Mus musculus OX=10090 GN=Psme3 PE=1 SV=1	24	8	29.5	4.58521e+06	4.46493e+06	High	High
High	Master Protein	O88668	Protein CREG1 OS=Mus musculus OX=10090 GN=Creg1 PE=1 SV=1	26	8	24.4	1.69448e+07	2.15104e+07	High	High
High	Master Protein	Q80WJ7	Protein LYRIC OS=Mus musculus OX=10090 GN=Mtdh PE=1 SV=1	13	8	63.8	1.90417e+06	1.51661e+06	High	High
High	Master Protein	Q8K3C3	Protein LZIC OS=Mus musculus OX=10090 GN=Lzic PE=1 SV=1	43	8	21.5	5.96492e+06	5.28533e+06	High	High
High	Master Protein	Q91VH6	Protein MEMO1 OS=Mus musculus OX=10090 GN=Memo1 PE=1 SV=1	40	8	33.7	2.06122e+06	3.53746e+06	High	High
High	Master Protein	P97352	Protein S100-A13 OS=Mus musculus OX=10090 GN=S100a13 PE=1 SV=1	66	8	11.2	5.06829e+06	5.23591e+06	High	High
High	Master Protein	O88653	Ragulator complex protein LAMTOR3 OS=Mus musculus OX=10090 GN=Lamtor3 PE=1 SV=1	50	8	13.5	7.83066e+06	6.24175e+06	High	High
High	Master Protein	P46061	Ran GTPase-activating protein 1 OS=Mus musculus OX=10090 GN=Rangap1 PE=1 SV=2	16	8	63.5	1.96786e+06	1.12669e+06	High	High
High	Master Protein	F2Z3U3	Ras association (RalGDS/AF-6) and pleckstrin homology domains 1 OS=Mus musculus OX=10090 GN=Raph1 PE=1 SV=2	7	8	136.7	360025	286465	High	High
High	Master Protein	Q9CZE3	Ras-related protein Rab-32 OS=Mus musculus OX=10090 GN=Rab32 PE=1 SV=3	32	8	25.1	3.17459e+06	2.82619e+06	High	High
High	Master Protein	Q99JI6	Ras-related protein Rap-1b OS=Mus musculus OX=10090 GN=Rap1b PE=1 SV=2	30	8	20.8	1.86598e+07	1.53464e+07	High	High
High	Master Protein	Q8VE37	Regulator of chromosome condensation OS=Mus musculus OX=10090 GN=Rcc1 PE=1 SV=1	17	8	44.9	6.52181e+06	5.87243e+06	High	High
High	Master Protein	A0A3Q4EGR2	Rho-associated protein kinase 1 OS=Mus musculus OX=10090 GN=Rock1 PE=1 SV=1	7	8	127.5	827927	710221	High	High
High	Master Protein	Q9CS42	Ribose-phosphate pyrophosphokinase 2 OS=Mus musculus OX=10090 GN=Prps2 PE=1 SV=4	23	8	34.8	6.4329e+06	4611471	High	High
High	Master Protein	B2RY56	RNA-binding protein 25 OS=Mus musculus OX=10090 GN=Rbm25 PE=1 SV=2	8	8	99.5	1.33803e+06	992639	High	High
High	Master Protein	Q8BIJ7	RUN and FYVE domain-containing protein 1 OS=Mus musculus OX=10090 GN=Rufy1 PE=1 SV=1	9	8	80.3	2.1578e+06	1.90299e+06	High	High
High	Master Protein	P70274	Selenoprotein P OS=Mus musculus OX=10090 GN=Selenop PE=1 SV=3	13	8	42.7	3.07117e+06	2.47686e+06	High	High
High	Master Protein	D3YX27	Serine protease HTRA2, mitochondrial OS=Mus musculus OX=10090 GN=Htra2 PE=1 SV=1	18	8	45.8	3.16041e+06	2.70497e+06	High	High
High	Master Protein	Q542V3	Serine/arginine-rich-splicing factor 4 OS=Mus musculus OX=10090 GN=Srsf4 PE=1 SV=1	8	8	56.2	90858	123797	High	High
High	Master Protein	A2AAY5	SH3 and PX domain-containing protein 2B OS=Mus musculus OX=10090 GN=Sh3pxd2b PE=1 SV=1	9	8	101.5	3.56906e+06	3.6727e+06	High	High
High	Master Protein	Q8K2Q9	Shootin-1 OS=Mus musculus OX=10090 GN=Shtn1 PE=1 SV=1	11	8	71.3	2.47179e+06	2.3983e+06	High	High
High	Master Protein	Q8BMA6	Signal recognition particle subunit SRP68 OS=Mus musculus OX=10090 GN=Srp68 PE=1 SV=2	15	8	70.5	863196	799057	High	High
High	Master Protein	P63166	Small ubiquitin-related modifier 1 OS=Mus musculus OX=10090 GN=Sumo1 PE=1 SV=1	52	8	11.6	9.8252e+06	9.4797e+06	High	High
High	Master Protein	H7BWX9	Small ubiquitin-related modifier 2 OS=Mus musculus OX=10090 GN=Sumo2 PE=1 SV=1	42	8	6	1.03017e+06	693771	High	High
High	Master Protein	P70452	Syntaxin-4 OS=Mus musculus OX=10090 GN=Stx4 PE=1 SV=1	22	8	34.1	3.36604e+06	2.84927e+06	High	High
High	Master Protein	Q60770	Syntaxin-binding protein 3 OS=Mus musculus OX=10090 GN=Stxbp3 PE=1 SV=1	10	8	67.9	3.27315e+06	3131275	High	High
High	Master Protein	Q91YJ3	Thymocyte nuclear protein 1 OS=Mus musculus OX=10090 GN=Thyn1 PE=1 SV=1	23	8	26.2	3.62601e+06	3.50924e+06	High	High
High	Master Protein	Q6ZWY8	Thymosin beta-10 OS=Mus musculus OX=10090 GN=Tmsb10 PE=1 SV=3	52	8	5	4.35115e+06	5.6703e+06	High	High
High	Master Protein	Q8BH58	TIP41-like protein OS=Mus musculus OX=10090 GN=Tiprl PE=1 SV=1	33	8	31.2	2.8373e+06	2.73254e+06	High	High
High	Master Protein	Q99LJ1	Tissue alpha-L-fucosidase OS=Mus musculus OX=10090 GN=Fuca1 PE=1 SV=1	16	8	52.2	3.05258e+06	3.47209e+06	High	High
High	Master Protein	Q9QZ06	Toll-interacting protein OS=Mus musculus OX=10090 GN=Tollip PE=1 SV=1	24	8	30.3	7.08003e+06	4.0127e+06	High	High
High	Master Protein	Q04207	Transcription factor p65 OS=Mus musculus OX=10090 GN=Rela PE=1 SV=1	20	8	60.2	1.69517e+06	1.30937e+06	High	High
High	Master Protein	A0A2R8VH99	Tudor-interacting repair regulator protein OS=Mus musculus OX=10090 GN=Nudt16l1 PE=1 SV=1	32	8	22.1	2.38229e+06	2.16524e+06	High	High
High	Master Protein	P35821	Tyrosine-protein phosphatase non-receptor type 1 OS=Mus musculus OX=10090 GN=Ptpn1 PE=1 SV=2	13	8	49.6	3566282	3.25335e+06	High	High
High	Master Protein	P35831	Tyrosine-protein phosphatase non-receptor type 12 OS=Mus musculus OX=10090 GN=Ptpn12 PE=1 SV=3	11	8	86.5	1.24329e+06	1.33235e+06	High	High
High	Master Protein	Q9DAW6	U4/U6 small nuclear ribonucleoprotein Prp4 OS=Mus musculus OX=10090 GN=Prpf4 PE=1 SV=1	16	8	58.3	2.21219e+06	2.39275e+06	High	High
High	Master Protein	D3YTP8	U6 snRNA-associated Sm-like protein LSm4 (Fragment) OS=Mus musculus OX=10090 GN=Lsm4 PE=1 SV=8	24	8	11.1	2.85849e+06	2.64637e+06	High	High
High	Master Protein	Q9QZU9	Ubiquitin/ISG15-conjugating enzyme E2 L6 OS=Mus musculus OX=10090 GN=Ube2l6 PE=1 SV=3	38	8	17.8	3.76289e+06	4.12026e+06	High	High
High	Master Protein	P61961	Ubiquitin-fold modifier 1 OS=Mus musculus OX=10090 GN=Ufm1 PE=1 SV=1	68	8	9.1	16097395	1.4911e+07	High	High
High	Master Protein	Q9CPX6	Ubiquitin-like-conjugating enzyme ATG3 OS=Mus musculus OX=10090 GN=Atg3 PE=1 SV=1	18	8	35.8	4.56938e+06	3.9196e+06	High	High
High	Master Protein	Q99104	Unconventional myosin-Va OS=Mus musculus OX=10090 GN=Myo5a PE=1 SV=2	5	8	215.4	1.98802e+06	1.54654e+06	High	High
High	Master Protein	Q91XH6	Vesicle transport through interaction with t-SNAREs 1B homolog OS=Mus musculus OX=10090 GN=Vti1b PE=1 SV=1	27	8	26.7	3.4884e+06	3.08564e+06	High	High
High	Master Protein	Q9D1K2	V-type proton ATPase subunit F OS=Mus musculus OX=10090 GN=Atp6v1f PE=1 SV=2	54	8	13.4	4.35019e+06	3.60737e+06	High	High
High	Master Protein	Q8BFQ4	WD repeat-containing protein 82 OS=Mus musculus OX=10090 GN=Wdr82 PE=1 SV=1	20	8	35.1	831542	1.00887e+06	High	High
High	Master Protein	Q9DAK9	14 kDa phosphohistidine phosphatase OS=Mus musculus OX=10090 GN=Phpt1 PE=1 SV=1	51	7	14	2.67003e+06	2.77245e+06	High	High
High	Master Protein	Q8QZS1	3-hydroxyisobutyryl-CoA hydrolase, mitochondrial OS=Mus musculus OX=10090 GN=Hibch PE=1 SV=1	19	7	43	1.87419e+06	1.34818e+06	High	High
High	Master Protein	F7AEH4	40S ribosomal protein S12 OS=Mus musculus OX=10090 GN=Rps12 PE=1 SV=1	41	7	15.2	17489254	1.71166e+07	High	High
High	Master Protein	I7HLV2	60S ribosomal protein L10 (Fragment) OS=Mus musculus OX=10090 GN=Rpl10 PE=1 SV=1	18	7	23.1	4.51185e+06	2.29592e+06	High	High
High	Master Protein	Q9CR57	60S ribosomal protein L14 OS=Mus musculus OX=10090 GN=Rpl14 PE=1 SV=3	22	7	23.5	7.58194e+06	7.42492e+06	High	High
High	Master Protein	P14115	60S ribosomal protein L27a OS=Mus musculus OX=10090 GN=Rpl27a PE=1 SV=5	32	7	16.6	4.73725e+06	4.62572e+06	High	High
High	Master Protein	P41105	60S ribosomal protein L28 OS=Mus musculus OX=10090 GN=Rpl28 PE=1 SV=2	22	7	15.7	5.22029e+06	3.97457e+06	High	High
High	Master Protein	Q561M1	Acp1 protein OS=Mus musculus OX=10090 GN=Acp1 PE=1 SV=1	32	7	17.9	703875	667123	High	Peak Found
High	Master Protein	Q8CG72	ADP-ribose glycohydrolase ARH3 OS=Mus musculus OX=10090 GN=Adprhl2 PE=1 SV=1	14	7	39.4	2.79333e+06	3.1892e+06	High	High
High	Master Protein	O08915	AH receptor-interacting protein OS=Mus musculus OX=10090 GN=Aip PE=1 SV=1	19	7	37.6	3.0319e+06	2.55461e+06	High	High
High	Master Protein	Q8K157	Aldose 1-epimerase OS=Mus musculus OX=10090 GN=Galm PE=1 SV=1	15	7	37.8	3.29251e+06	2.85994e+06	High	High
High	Master Protein	E9PZ88	Alpha-mannosidase 2C1 OS=Mus musculus OX=10090 GN=Man2c1 PE=1 SV=1	9	7	104.6	1.80476e+06	1.5727e+06	High	High
High	Master Protein	Q8R010	Aminoacyl tRNA synthase complex-interacting multifunctional protein 2 OS=Mus musculus OX=10090 GN=Aimp2 PE=1 SV=2	26	7	35.4	2.32912e+06	1.67001e+06	High	High
High	Master Protein	A0A0R4J050	Aminoacylase-1 OS=Mus musculus OX=10090 GN=Acy1 PE=1 SV=1	16	7	45.8	1.70849e+06	1.81613e+06	High	High
High	Master Protein	P10107	Annexin A1 OS=Mus musculus OX=10090 GN=Anxa1 PE=1 SV=2	14	7	38.7	1.07776e+06	1.51336e+06	High	High
High	Master Protein	D3Z5T2	Armadillo repeat-containing protein 10 OS=Mus musculus OX=10090 GN=Armc10 PE=1 SV=1	30	7	25.8	1.6375e+06	1.60471e+06	High	High
High	Master Protein	Q91VK1	Basic leucine zipper and W2 domain-containing protein 2 OS=Mus musculus OX=10090 GN=Bzw2 PE=1 SV=1	10	7	48	683950	1.14291e+06	High	High
High	Master Protein	A0A1B0GX27	Branched-chain-amino-acid aminotransferase OS=Mus musculus OX=10090 GN=Bcat2 PE=1 SV=1	12	7	43.5	2.11078e+06	2.26137e+06	High	High
High	Master Protein	Q3UI43	BRISC and BRCA1-A complex member 1 OS=Mus musculus OX=10090 GN=Babam1 PE=1 SV=1	22	7	36.8	1.57306e+06	1.44302e+06	High	High
High	Master Protein	Q8CH18	Cell division cycle and apoptosis regulator protein 1 OS=Mus musculus OX=10090 GN=Ccar1 PE=1 SV=1	6	7	132	2126234	2.06079e+06	High	High
High	Master Protein	P61924	Coatomer subunit zeta-1 OS=Mus musculus OX=10090 GN=Copz1 PE=1 SV=1	41	7	20.2	3833622	3.65651e+06	High	High
High	Master Protein	Q9D8X2	Coiled-coil domain-containing protein 124 OS=Mus musculus OX=10090 GN=Ccdc124 PE=1 SV=1	29	7	25.3	5.75211e+06	5.09856e+06	High	High
High	Master Protein	Q08024	Core-binding factor subunit beta OS=Mus musculus OX=10090 GN=Cbfb PE=1 SV=1	22	7	22	1.66649e+06	1.57292e+06	High	High
High	Master Protein	A2A432	Cullin-4B OS=Mus musculus OX=10090 GN=Cul4b PE=1 SV=1	6	7	110.6	1.79352e+06	1.47623e+06	High	Peak Found
High	Master Protein	Q9Z2L7	Cytokine receptor-like factor 3 OS=Mus musculus OX=10090 GN=Crlf3 PE=1 SV=1	21	7	49.5	1.6141e+06	2.63492e+06	High	High
High	Master Protein	A0A087WR57	Death-associated protein 1 OS=Mus musculus OX=10090 GN=Dap PE=1 SV=1	71	7	8.9	3.59392e+06	4.27007e+06	High	High
High	Master Protein	A2A9M4	Dedicator of cytokinesis protein 7 OS=Mus musculus OX=10090 GN=Dock7 PE=1 SV=2	4	7	241.3	809930	765901	High	High
High	Master Protein	Q9D8N2	DENN domain-containing protein 10 OS=Mus musculus OX=10090 GN=Dennd10 PE=1 SV=2	21	7	40.4	3.85755e+06	2.59389e+06	High	High
High	Master Protein	P43346	Deoxycytidine kinase OS=Mus musculus OX=10090 GN=Dck PE=1 SV=1	20	7	30.3	1.12836e+08	1.15144e+08	High	High
High	Master Protein	E0CXZ5	Deoxynucleoside triphosphate triphosphohydrolase SAMHD1 OS=Mus musculus OX=10090 GN=Samhd1 PE=1 SV=1	37	7	16.6	2091183	2.84142e+06	High	High
High	Master Protein	D3Z6R9	DNA-(apurinic or apyrimidinic site) lyase (Fragment) OS=Mus musculus OX=10090 GN=Apex1 PE=1 SV=2	35	7	23.7	6.09017e+06	5.87235e+06	High	High
High	Master Protein	Q61550	Double-strand-break repair protein rad21 homolog OS=Mus musculus OX=10090 GN=Rad21 PE=1 SV=3	12	7	72	1.92477e+06	1.52756e+06	High	High
High	Master Protein	P62627	Dynein light chain roadblock-type 1 OS=Mus musculus OX=10090 GN=Dynlrb1 PE=1 SV=3	61	7	11	8.42796e+06	7.22058e+06	High	High
High	Master Protein	E9QP49	EH domain-binding protein 1-like protein 1 OS=Mus musculus OX=10090 GN=Ehbp1l1 PE=1 SV=1	5	7	184.7	834232	1.13158e+06	High	High
High	Master Protein	P83940	Elongin-C OS=Mus musculus OX=10090 GN=Eloc PE=1 SV=1	47	7	12.5	5.88527e+06	5.35587e+06	High	High
High	Master Protein	Q62419	Endophilin-A2 OS=Mus musculus OX=10090 GN=Sh3gl1 PE=1 SV=1	16	7	41.5	2031456	1.49511e+06	High	High
High	Master Protein	Q99KR3	Endoribonuclease LACTB2 OS=Mus musculus OX=10090 GN=Lactb2 PE=1 SV=1	20	7	32.7	4.19749e+06	4.81572e+06	High	High
High	Master Protein	Q9D1M4	Eukaryotic translation elongation factor 1 epsilon-1 OS=Mus musculus OX=10090 GN=Eef1e1 PE=1 SV=1	26	7	19.8	2.26959e+06	2.03987e+06	High	High
High	Master Protein	Q9DBZ5	Eukaryotic translation initiation factor 3 subunit K OS=Mus musculus OX=10090 GN=Eif3k PE=1 SV=1	28	7	25.1	6.70375e+06	6.00174e+06	High	High
High	Master Protein	O55135	Eukaryotic translation initiation factor 6 OS=Mus musculus OX=10090 GN=Eif6 PE=1 SV=2	27	7	26.5	6.2619e+06	5.06193e+06	High	High
High	Master Protein	Q6P1Y9	Exocyst complex component 1 OS=Mus musculus OX=10090 GN=Exoc1 PE=1 SV=1	8	7	102.6	444435	413259	High	High
High	Master Protein	Q9D4H1	Exocyst complex component 2 OS=Mus musculus OX=10090 GN=Exoc2 PE=1 SV=1	6	7	103.9	1.54043e+06	1.14963e+06	High	High
High	Master Protein	Q8BHJ5	F-box-like/WD repeat-containing protein TBL1XR1 OS=Mus musculus OX=10090 GN=Tbl1xr1 PE=1 SV=1	11	7	55.6	2.09828e+06	1.65936e+06	High	High
High	Master Protein	Q9R059	Four and a half LIM domains protein 3 OS=Mus musculus OX=10090 GN=Fhl3 PE=1 SV=2	16	7	31.8	7.98029e+06	7.46518e+06	High	High
High	Master Protein	Q61584	Fragile X mental retardation syndrome-related protein 1 OS=Mus musculus OX=10090 GN=Fxr1 PE=1 SV=2	9	7	76.2	1.47255e+06	1.25376e+06	High	High
High	Master Protein	Q9ERD8	Gamma-parvin OS=Mus musculus OX=10090 GN=Parvg PE=1 SV=2	16	7	37.6	1.21909e+06	970016	High	High
High	Master Protein	Q9D7M1	Glucose-induced degradation protein 8 homolog OS=Mus musculus OX=10090 GN=Gid8 PE=1 SV=1	30	7	26.8	2.31298e+06	1.96577e+06	High	High
High	Master Protein	Q8R5I6	Glutathione S-transferase mu 4 OS=Mus musculus OX=10090 GN=Gstm4 PE=1 SV=1	25	7	25.5	199247	228961	Peak Found	High
High	Master Protein	K3W4S6	Glycogenin OS=Mus musculus OX=10090 GN=Gyg PE=1 SV=1	12	7	41.9	7.24897e+06	3.22048e+06	High	High
High	Master Protein	Q61646	Haptoglobin OS=Mus musculus OX=10090 GN=Hp PE=1 SV=1	16	7	38.7	2.22196e+06	1.96736e+06	High	High
High	Master Protein	Q9EQ08	Heparan N-sulfatase OS=Mus musculus OX=10090 GN=Sgsh PE=1 SV=1	19	7	56.7	3.04066e+06	3.38458e+06	High	High
High	Master Protein	F6VQH5	Heterogeneous nuclear ribonucleoprotein D-like (Fragment) OS=Mus musculus OX=10090 GN=Hnrnpdl PE=1 SV=1	10	7	35.6	1.4833e+06	1.02008e+06	High	High
High	Master Protein	Q03963	Interferon-induced, double-stranded RNA-activated protein kinase OS=Mus musculus OX=10090 GN=Eif2ak2 PE=1 SV=2	8	7	58.2	1.94547e+06	1.35256e+06	High	High
High	Master Protein	E9Q4K7	Kinesin family member 13B OS=Mus musculus OX=10090 GN=Kif13b PE=1 SV=1	5	7	204.4	2.63889e+06	1.96901e+06	High	High
High	Master Protein	Q5UE59	Kinesin light chain 1 OS=Mus musculus OX=10090 GN=Klc1 PE=1 SV=1	13	7	61.6	1.98042e+06	1.54677e+06	High	High
High	Master Protein	Q922Q8	Leucine-rich repeat-containing protein 59 OS=Mus musculus OX=10090 GN=Lrrc59 PE=1 SV=1	16	7	34.9	2.83394e+06	2.57346e+06	High	High
High	Master Protein	Q60754	Macrophage receptor MARCO OS=Mus musculus OX=10090 GN=Marco PE=1 SV=1	15	7	52.7	2.34545e+06	1.85149e+06	High	High
High	Master Protein	A2AJI1	MAP7 domain-containing protein 1 OS=Mus musculus OX=10090 GN=Map7d1 PE=1 SV=1	11	7	85.7	855070	823200	High	High
High	Master Protein	Q99LB6	Methionine adenosyltransferase 2 subunit beta OS=Mus musculus OX=10090 GN=Mat2b PE=1 SV=1	18	7	37.4	2.66389e+06	2.51773e+06	High	High
High	Master Protein	Q9CQT1	Methylthioribose-1-phosphate isomerase OS=Mus musculus OX=10090 GN=Mri1 PE=1 SV=1	29	7	39.4	4.22276e+06	3.4765e+06	High	High
High	Master Protein	Q8VCF0	Mitochondrial antiviral-signaling protein OS=Mus musculus OX=10090 GN=Mavs PE=1 SV=1	11	7	53.4	1.81915e+06	1.33016e+06	High	High
High	Master Protein	Q9WTU6	Mitogen-activated protein kinase 9 OS=Mus musculus OX=10090 GN=Mapk9 PE=1 SV=2	21	7	48.2	1.35244e+06	1.69741e+06	High	High
High	Master Protein	O35375	Neuropilin-2 OS=Mus musculus OX=10090 GN=Nrp2 PE=1 SV=2	7	7	104.6	1.70924e+06	2.10626e+06	High	High
High	Master Protein	Q8BHN3	Neutral alpha-glucosidase AB OS=Mus musculus OX=10090 GN=Ganab PE=1 SV=1	9	7	106.8	2.7337e+06	1.28204e+06	High	High
High	Master Protein	Q8BZW8	NHL repeat-containing protein 2 OS=Mus musculus OX=10090 GN=Nhlrc2 PE=1 SV=1	9	7	78.4	1.65688e+06	1.42862e+06	High	High
High	Master Protein	Q3UYV9	Nuclear cap-binding protein subunit 1 OS=Mus musculus OX=10090 GN=Ncbp1 PE=1 SV=2	7	7	91.9	722833	887192	High	High
High	Master Protein	P25799	Nuclear factor NF-kappa-B p105 subunit OS=Mus musculus OX=10090 GN=Nfkb1 PE=1 SV=2	6	7	105.5	2.33068e+06	1.6742e+06	High	High
High	Master Protein	Q9JIK5	Nucleolar RNA helicase 2 OS=Mus musculus OX=10090 GN=Ddx21 PE=1 SV=3	8	7	93.5	1.12111e+06	1.4155e+06	High	High
High	Master Protein	E9Q3G8	Nucleoporin 153 OS=Mus musculus OX=10090 GN=Nup153 PE=1 SV=1	4	7	151.9	598273	677564	High	High
High	Master Protein	P36552	Oxygen-dependent coproporphyrinogen-III oxidase, mitochondrial OS=Mus musculus OX=10090 GN=Cpox PE=1 SV=2	15	7	49.7	2.21681e+06	1.78354e+06	High	High
High	Master Protein	O88531	Palmitoyl-protein thioesterase 1 OS=Mus musculus OX=10090 GN=Ppt1 PE=1 SV=2	19	7	34.5	2.344e+06	2.40654e+06	High	High
High	Master Protein	Q9CWW6	Peptidyl-prolyl cis-trans isomerase NIMA-interacting 4 OS=Mus musculus OX=10090 GN=Pin4 PE=1 SV=1	27	7	13.8	6.71558e+06	5.98367e+06	High	High
High	Master Protein	Q8CEC6	Peptidylprolyl isomerase domain and WD repeat-containing protein 1 OS=Mus musculus OX=10090 GN=Ppwd1 PE=1 SV=2	10	7	73.3	1.69341e+06	1.59716e+06	High	High
High	Master Protein	P26450	Phosphatidylinositol 3-kinase regulatory subunit alpha OS=Mus musculus OX=10090 GN=Pik3r1 PE=1 SV=2	8	7	83.5	1.60069e+06	1.37732e+06	High	High
High	Master Protein	A0A1Y7VLZ7	Phosphofurin acidic cluster sorting protein 2 OS=Mus musculus OX=10090 GN=Pacs2 PE=1 SV=1	7	7	98.4	1.5563e+06	1.15079e+06	High	High
High	Master Protein	Q8R574	Phosphoribosyl pyrophosphate synthase-associated protein 2 OS=Mus musculus OX=10090 GN=Prpsap2 PE=1 SV=1	20	7	40.9	1.42356e+06	1.35899e+06	High	High
High	Master Protein	Q9D711	Pirin OS=Mus musculus OX=10090 GN=Pir PE=1 SV=1	23	7	32	2.59656e+06	2.73031e+06	High	High
High	Master Protein	Q9Z126	Platelet factor 4 OS=Mus musculus OX=10090 GN=Pf4 PE=1 SV=1	29	7	11.2	1.47497e+07	1.64804e+07	High	High
High	Master Protein	P61759	Prefoldin subunit 3 OS=Mus musculus OX=10090 GN=Vbp1 PE=1 SV=2	19	7	22.4	3.73688e+06	3.37442e+06	High	High
High	Master Protein	Q569Z5	Probable ATP-dependent RNA helicase DDX46 OS=Mus musculus OX=10090 GN=Ddx46 PE=1 SV=2	4	7	117.4	770378	809873	High	High
High	Master Protein	Q99J87	Probable ATP-dependent RNA helicase DHX58 OS=Mus musculus OX=10090 GN=Dhx58 PE=1 SV=2	7	7	76.7	2.07944e+06	1.83475e+06	High	High
High	Master Protein	A0A0R4J256	Proteasome subunit beta OS=Mus musculus OX=10090 GN=Psmb9 PE=1 SV=1	24	7	23.3	2.25095e+07	1.44942e+07	High	High
High	Master Protein	A0A087WPF8	Protein ABHD14B (Fragment) OS=Mus musculus OX=10090 GN=Abhd14b PE=1 SV=1	38	7	18.4	6.25869e+06	5.26279e+06	High	High
High	Master Protein	B2KGA7	Protein archease OS=Mus musculus OX=10090 GN=Zbtb8os PE=1 SV=1	29	7	19.6	2.27742e+06	2.04345e+06	High	High
High	Master Protein	Q68FL4	Putative adenosylhomocysteinase 3 OS=Mus musculus OX=10090 GN=Ahcyl2 PE=1 SV=1	6	7	66.9	1.35527e+06	1.34873e+06	High	High
High	Master Protein	Q9QXG2	Rab proteins geranylgeranyltransferase component A 1 OS=Mus musculus OX=10090 GN=Chm PE=1 SV=1	10	7	73.9	1.52066e+06	1.79572e+06	High	High
High	Master Protein	Q6VN19	Ran-binding protein 10 OS=Mus musculus OX=10090 GN=Ranbp10 PE=1 SV=2	16	7	67.1	1.52163e+06	808966	High	High
High	Master Protein	P55258	Ras-related protein Rab-8A OS=Mus musculus OX=10090 GN=Rab8a PE=1 SV=2	23	7	23.7	913884	1.25235e+06	High	High
High	Master Protein	E9Q7W0	Recombining-binding protein suppressor of hairless OS=Mus musculus OX=10090 GN=Rbpj PE=1 SV=1	10	7	54.3	2.06348e+06	2.49944e+06	High	High
High	Master Protein	S4R248	Rho GTPase-activating protein 12 OS=Mus musculus OX=10090 GN=Arhgap12 PE=1 SV=1	11	7	90	807431	4.0773e+06	High	High
High	Master Protein	A2AWP8	Rho guanine nucleotide exchange factor 10-like protein OS=Mus musculus OX=10090 GN=Arhgef10l PE=1 SV=1	6	7	139.9	2.7707e+06	2.06581e+06	High	High
High	Master Protein	Q8R1Q9	Ribokinase OS=Mus musculus OX=10090 GN=Rbks PE=1 SV=1	15	7	34.1	1.57795e+06	1.47209e+06	High	High
High	Master Protein	Q8C7E4	Ribonuclease 4 OS=Mus musculus OX=10090 GN=Rnase4 PE=1 SV=1	24	7	17	6.84326e+06	9.97091e+06	High	High
High	Master Protein	P07742	Ribonucleoside-diphosphate reductase large subunit OS=Mus musculus OX=10090 GN=Rrm1 PE=1 SV=2	10	7	90.2	1.04382e+06	863226	High	High
High	Master Protein	Q9CQK7	RWD domain-containing protein 1 OS=Mus musculus OX=10090 GN=Rwdd1 PE=1 SV=1	25	7	27.8	2.14013e+06	2.21613e+06	High	High
High	Master Protein	P84104	Serine/arginine-rich splicing factor 3 OS=Mus musculus OX=10090 GN=Srsf3 PE=1 SV=1	26	7	19.3	1.01208e+07	7.04473e+06	High	High
High	Master Protein	O35326	Serine/arginine-rich splicing factor 5 OS=Mus musculus OX=10090 GN=Srsf5 PE=1 SV=2	17	7	30.9	3.02636e+06	3.27204e+06	High	High
High	Master Protein	Q8BYC6	Serine/threonine-protein kinase TAO3 OS=Mus musculus OX=10090 GN=Taok3 PE=1 SV=2	7	7	105.3	2.68186e+06	2.32764e+06	High	High
High	Master Protein	E9Q481	Serine/threonine-protein phosphatase 4 regulatory subunit 3A OS=Mus musculus OX=10090 GN=Ppp4r3a PE=1 SV=1	5	7	95.3	1.59891e+06	1.3017e+06	High	High
High	Master Protein	O88811	Signal transducing adapter molecule 2 OS=Mus musculus OX=10090 GN=Stam2 PE=1 SV=1	9	7	57.4	2.94014e+06	2.87947e+06	High	High
High	Master Protein	P62305	Small nuclear ribonucleoprotein E OS=Mus musculus OX=10090 GN=Snrpe PE=1 SV=1	38	7	10.8	1.61844e+07	1.42357e+07	High	High
High	Master Protein	P62320	Small nuclear ribonucleoprotein Sm D3 OS=Mus musculus OX=10090 GN=Snrpd3 PE=1 SV=1	32	7	13.9	3.04836e+07	23351089	High	High
High	Master Protein	A0A0B4J1E2	SNW domain-containing protein 1 OS=Mus musculus OX=10090 GN=Snw1 PE=1 SV=1	12	7	61.4	1.46551e+06	1.13516e+06	High	High
High	Master Protein	Q8BVL3	Sorting nexin-17 OS=Mus musculus OX=10090 GN=Snx17 PE=1 SV=2	15	7	52.8	2.29314e+06	1.90061e+06	High	High
High	Master Protein	Q3U0I9	Sorting nexin-8 OS=Mus musculus OX=10090 GN=Snx8 PE=1 SV=1	19	7	47.1	2.53846e+06	2.10282e+06	High	High
High	Master Protein	O08797	SPI6 OS=Mus musculus OX=10090 GN=Serpinb9 PE=1 SV=1	15	7	42.2	2.17579e+06	2.11645e+06	High	High
High	Master Protein	Q9D883	Splicing factor U2AF 35 kDa subunit OS=Mus musculus OX=10090 GN=U2af1 PE=1 SV=4	22	7	27.8	2.96951e+06	2.72127e+06	High	High
High	Master Protein	G3X956	SPT16, facilitates chromatin-remodeling subunit OS=Mus musculus OX=10090 GN=Supt16 PE=1 SV=1	7	7	119.8	1.49734e+06	3.28182e+06	High	High
High	Master Protein	P09671	Superoxide dismutase [Mn], mitochondrial OS=Mus musculus OX=10090 GN=Sod2 PE=1 SV=3	26	7	24.6	7.18689e+06	6.1336e+06	High	High
High	Master Protein	O08992	Syntenin-1 OS=Mus musculus OX=10090 GN=Sdcbp PE=1 SV=1	25	7	32.4	6.07951e+06	2.98822e+06	High	High
High	Master Protein	Q9CQM5	Thioredoxin domain-containing protein 17 OS=Mus musculus OX=10090 GN=Txndc17 PE=1 SV=1	41	7	14	23721955	1.86559e+07	High	High
High	Master Protein	E9PV93	T-lymphocyte surface antigen Ly-9 OS=Mus musculus OX=10090 GN=Ly9 PE=1 SV=1	7	7	71.1	2.3891e+06	2.14445e+06	High	High
High	Master Protein	Q64152	Transcription factor BTF3 OS=Mus musculus OX=10090 GN=Btf3 PE=1 SV=3	37	7	22	1.08925e+07	7.74535e+06	High	High
High	Master Protein	Q6P2B1	Transportin-3 OS=Mus musculus OX=10090 GN=Tnpo3 PE=1 SV=1	10	7	104.1	2.04464e+06	1.92838e+06	High	High
High	Master Protein	Q99NH8	Triggering receptor expressed on myeloid cells 2 OS=Mus musculus OX=10090 GN=Trem2 PE=1 SV=1	18	7	24.5	6.29805e+06	6.00378e+06	High	High
High	Master Protein	Q9D8Y7	Tumor necrosis factor alpha-induced protein 8-like protein 2 OS=Mus musculus OX=10090 GN=Tnfaip8l2 PE=1 SV=1	37	7	20.6	5.71248e+06	3.90193e+06	High	High
High	Master Protein	O35900	U6 snRNA-associated Sm-like protein LSm2 OS=Mus musculus OX=10090 GN=Lsm2 PE=1 SV=1	48	7	10.8	4.251e+06	4.99582e+06	High	High
High	Master Protein	P62257	Ubiquitin-conjugating enzyme E2 H OS=Mus musculus OX=10090 GN=Ube2h PE=1 SV=1	27	7	20.6	3.138e+06	2.48072e+06	High	High
High	Master Protein	Q5SUA5	Unconventional myosin-Ig OS=Mus musculus OX=10090 GN=Myo1g PE=1 SV=1	5	7	117.2	1.02178e+06	845045	High	High
High	Master Protein	Q9D1K7	UPF0687 protein C20orf27 homolog OS=Mus musculus OX=10090 PE=1 SV=3	31	7	19.5	1969087	2.03058e+06	High	High
High	Master Protein	P06869	Urokinase-type plasminogen activator OS=Mus musculus OX=10090 GN=Plau PE=1 SV=1	12	7	48.2	1.06043e+06	1.29461e+06	High	High
High	Master Protein	Q9CR26	Vacuolar protein sorting-associated protein VTA1 homolog OS=Mus musculus OX=10090 GN=Vta1 PE=1 SV=1	17	7	33.9	4.5138e+06	3.61846e+06	High	High
High	Master Protein	P70280	Vesicle-associated membrane protein 7 OS=Mus musculus OX=10090 GN=Vamp7 PE=1 SV=1	21	7	25	2.34407e+06	2.26044e+06	High	High
High	Master Protein	Q9DBH5	Vesicular integral-membrane protein VIP36 OS=Mus musculus OX=10090 GN=Lman2 PE=1 SV=2	28	7	40.4	3.60622e+06	3.01082e+06	High	High
High	Master Protein	Q8BVQ0	WD repeat-containing protein 61 OS=Mus musculus OX=10090 GN=Wdr61 PE=1 SV=1	25	7	30.9	5.04825e+06	4.9818e+06	High	High
High	Master Protein	Q62384	Zinc finger protein ZPR1 OS=Mus musculus OX=10090 GN=Zpr1 PE=1 SV=1	19	7	50.7	2.93475e+06	2.56394e+06	High	High
High	Master Protein	F7AI87	26S proteasome non-ATPase regulatory subunit 4 (Fragment) OS=Mus musculus OX=10090 GN=Psmd4 PE=1 SV=1	24	6	21.3	382409	320963	High	High
High	Master Protein	P62843	40S ribosomal protein S15 OS=Mus musculus OX=10090 GN=Rps15 PE=1 SV=2	42	6	17	3.53292e+06	3.50928e+06	High	High
High	Master Protein	P62855	40S ribosomal protein S26 OS=Mus musculus OX=10090 GN=Rps26 PE=1 SV=3	27	6	13	5569271	5899449	High	High
High	Master Protein	Q6ZWU9	40S ribosomal protein S27 OS=Mus musculus OX=10090 GN=Rps27 PE=1 SV=3	38	6	9.5	3.93438e+06	3424624	High	High
High	Master Protein	Q6ZWY3	40S ribosomal protein S27-like OS=Mus musculus OX=10090 GN=Rps27l PE=1 SV=3	38	6	9.5	1.6215e+06	1.44522e+06	High	High
High	Master Protein	O54950	5'-AMP-activated protein kinase subunit gamma-1 OS=Mus musculus OX=10090 GN=Prkag1 PE=1 SV=2	19	6	37.5	1.96082e+06	1.57055e+06	High	High
High	Master Protein	P19253	60S ribosomal protein L13a OS=Mus musculus OX=10090 GN=Rpl13a PE=1 SV=4	17	6	23.4	4.65346e+06	3.92455e+06	High	High
High	Master Protein	P47915	60S ribosomal protein L29 OS=Mus musculus OX=10090 GN=Rpl29 PE=1 SV=2	19	6	17.6	3.90843e+06	3774261	High	High
High	Master Protein	P27659	60S ribosomal protein L3 OS=Mus musculus OX=10090 GN=Rpl3 PE=1 SV=3	17	6	46.1	3.97106e+06	4.33083e+06	High	High
High	Master Protein	Q9D1R9	60S ribosomal protein L34 OS=Mus musculus OX=10090 GN=Rpl34 PE=1 SV=2	15	6	13.3	2.76731e+06	2.7052e+06	High	High
High	Master Protein	Q9R1Z7	6-pyruvoyl tetrahydrobiopterin synthase OS=Mus musculus OX=10090 GN=Pts PE=1 SV=2	44	6	16.2	2.54073e+06	2.36481e+06	High	High
High	Master Protein	Q9JKX6	ADP-sugar pyrophosphatase OS=Mus musculus OX=10090 GN=Nudt5 PE=1 SV=1	23	6	24	2.49563e+06	1.92717e+06	High	High
High	Master Protein	Q8CG76	Aflatoxin B1 aldehyde reductase member 2 OS=Mus musculus OX=10090 GN=Akr7a2 PE=1 SV=3	13	6	40.6	1.11217e+06	642983	High	High
High	Master Protein	A0A2R8VHC0	Alpha-galactosidase (Fragment) OS=Mus musculus OX=10090 GN=Naga PE=1 SV=1	16	6	27	465870	511530	High	Peak Found
High	Master Protein	A2AE27	AMP deaminase OS=Mus musculus OX=10090 GN=Ampd2 PE=1 SV=1	8	6	94.6	1.204e+06	1.4798e+06	High	High
High	Master Protein	Q60709	Amyloid-like protein 2 OS=Mus musculus OX=10090 GN=Aplp2 PE=1 SV=1	8	6	85.2	1.966e+06	2.50726e+06	High	High
High	Master Protein	Q8WTY4	Anamorsin OS=Mus musculus OX=10090 GN=Ciapin1 PE=1 SV=1	30	6	33.4	1.26739e+06	1.34762e+06	High	High
High	Master Protein	Q80UP5	Ankyrin repeat domain-containing protein 13A OS=Mus musculus OX=10090 GN=Ankrd13a PE=1 SV=2	9	6	67.1	2336186	2.1649e+06	High	High
High	Master Protein	P61967	AP-1 complex subunit sigma-1A OS=Mus musculus OX=10090 GN=Ap1s1 PE=1 SV=1	20	6	18.7	3.37769e+06	2.52197e+06	High	High
High	Master Protein	Q9JKC8	AP-3 complex subunit mu-1 OS=Mus musculus OX=10090 GN=Ap3m1 PE=1 SV=1	23	6	46.9	3.6862e+06	2.76204e+06	High	High
High	Master Protein	Q91WU5	Arsenite methyltransferase OS=Mus musculus OX=10090 GN=As3mt PE=1 SV=2	14	6	41.8	2.64292e+06	2883311	High	High
High	Master Protein	P50295	Arylamine N-acetyltransferase 2 OS=Mus musculus OX=10090 GN=Nat2 PE=1 SV=1	14	6	33.7	1.62574e+06	1.43569e+06	High	High
High	Master Protein	Q6P542	ATP-binding cassette sub-family F member 1 OS=Mus musculus OX=10090 GN=Abcf1 PE=1 SV=1	7	6	94.9	1.42331e+06	939386	High	High
High	Master Protein	Q8C0J2	Autophagy-related protein 16-1 OS=Mus musculus OX=10090 GN=Atg16l1 PE=1 SV=1	9	6	68.1	1.66527e+06	1.40995e+06	High	High
High	Master Protein	A2A5R2	Brefeldin A-inhibited guanine nucleotide-exchange protein 2 OS=Mus musculus OX=10090 GN=Arfgef2 PE=1 SV=1	4	6	202.1	474406	607054	High	High
High	Master Protein	O54825	Bystin OS=Mus musculus OX=10090 GN=Bysl PE=1 SV=3	7	6	49.8	568744	526135	High	High
High	Master Protein	P13634	Carbonic anhydrase 1 OS=Mus musculus OX=10090 GN=Ca1 PE=1 SV=4	36	6	28.3	2.45424e+06	2.27284e+06	High	High
High	Master Protein	Q6A068	Cell division cycle 5-like protein OS=Mus musculus OX=10090 GN=Cdc5l PE=1 SV=2	8	6	92.1	178413	162776	High	Not Found
High	Master Protein	Q6A065	Centrosomal protein of 170 kDa OS=Mus musculus OX=10090 GN=Cep170 PE=1 SV=2	5	6	174.9	1.17073e+06	1.417e+06	High	High
High	Master Protein	Q9CQ10	Charged multivesicular body protein 3 OS=Mus musculus OX=10090 GN=Chmp3 PE=1 SV=3	13	6	25.2	3.90031e+06	2864284	High	High
High	Master Protein	Q8BTV2	Cleavage and polyadenylation specificity factor subunit 7 OS=Mus musculus OX=10090 GN=Cpsf7 PE=1 SV=2	14	6	52	1.35871e+06	1.17041e+06	High	High
High	Master Protein	Q99LI7	Cleavage stimulation factor subunit 3 OS=Mus musculus OX=10090 GN=Cstf3 PE=1 SV=1	8	6	82.8	933787	822836	High	High
High	Master Protein	P11087	Collagen alpha-1(I) chain OS=Mus musculus OX=10090 GN=Col1a1 PE=1 SV=4	3	6	137.9	4.8408e+06	6.18272e+06	High	High
High	Master Protein	O88271	Craniofacial development protein 1 OS=Mus musculus OX=10090 GN=Cfdp1 PE=1 SV=1	16	6	32.9	2.78943e+06	2.65069e+06	High	High
High	Master Protein	P70698	CTP synthase 1 OS=Mus musculus OX=10090 GN=Ctps1 PE=1 SV=2	7	6	66.6	270954	327753	High	High
High	Master Protein	S4R2U7	CUGBP Elav-like family member 2 OS=Mus musculus OX=10090 GN=Celf2 PE=1 SV=1	5	6	48.8	3.27555e+06	2.45244e+06	High	High
High	Master Protein	Q8BSU2	C-X-C motif chemokine 16 OS=Mus musculus OX=10090 GN=Cxcl16 PE=1 SV=2	14	6	26.9	3.67508e+06	4.99072e+06	High	High
High	Master Protein	P97315	Cysteine and glycine-rich protein 1 OS=Mus musculus OX=10090 GN=Csrp1 PE=1 SV=3	37	6	20.6	5.43258e+06	3.86574e+06	High	High
High	Master Protein	Q8CI75	DIS3-like exonuclease 2 OS=Mus musculus OX=10090 GN=Dis3l2 PE=1 SV=1	8	6	97.7	1.58044e+06	1.46911e+06	High	High
High	Master Protein	B1AZP2	Disks large-associated protein 4 OS=Mus musculus OX=10090 GN=Dlgap4 PE=1 SV=1	4	6	108	6.78438e+06	6.19081e+06	High	High
High	Master Protein	Q923G2	DNA-directed RNA polymerases I, II, and III subunit RPABC3 OS=Mus musculus OX=10090 GN=Polr2h PE=1 SV=3	22	6	17.1	2.40919e+06	2.49541e+06	High	High
High	Master Protein	Q9QYJ0	DnaJ homolog subfamily A member 2 OS=Mus musculus OX=10090 GN=Dnaja2 PE=1 SV=1	15	6	45.7	2.64049e+06	2.45527e+06	High	High
High	Master Protein	H7BX01	Dynamin-like 120 kDa protein, mitochondrial OS=Mus musculus OX=10090 GN=Opa1 PE=1 SV=1	6	6	113.2	1.5214e+06	1.34318e+06	High	High
High	Master Protein	Q62165	Dystroglycan OS=Mus musculus OX=10090 GN=Dag1 PE=1 SV=4	7	6	96.8	2.61613e+06	2.75769e+06	High	High
High	Master Protein	Q69ZR2	E3 ubiquitin-protein ligase HECTD1 OS=Mus musculus OX=10090 GN=Hectd1 PE=1 SV=2	3	6	289.9	549684	715874	High	High
High	Master Protein	A0A087WNZ7	E3 ubiquitin-protein ligase TRIP12 OS=Mus musculus OX=10090 GN=Trip12 PE=1 SV=1	4	6	220.5	608963	759041	High	High
High	Master Protein	Q9D379	Epoxide hydrolase 1 OS=Mus musculus OX=10090 GN=Ephx1 PE=1 SV=2	12	6	52.5	2.26898e+06	1744658	High	High
High	Master Protein	Q921I9	Exosome complex component RRP41 OS=Mus musculus OX=10090 GN=Exosc4 PE=1 SV=3	18	6	26.2	1.47294e+06	3.30938e+06	High	High
High	Master Protein	P12804	Fibroleukin OS=Mus musculus OX=10090 GN=Fgl2 PE=1 SV=1	8	6	48.9	2.11345e+06	2.2775e+06	High	High
High	Master Protein	E9QAH1	Golgi autoantigen, golgin subfamily b, macrogolgin 1 OS=Mus musculus OX=10090 GN=Golgb1 PE=1 SV=1	2	6	365.1	433763	361957	High	High
High	Master Protein	Q8C547	HEAT repeat-containing protein 5B OS=Mus musculus OX=10090 GN=Heatr5b PE=1 SV=3	3	6	224.2	582963	593514	High	High
High	Master Protein	Q3UMU9	Hepatoma-derived growth factor-related protein 2 OS=Mus musculus OX=10090 GN=Hdgfl2 PE=1 SV=1	6	6	74.2	234713	655716	High	High
High	Master Protein	P35492	Histidine ammonia-lyase OS=Mus musculus OX=10090 GN=Hal PE=1 SV=1	7	6	72.2	931309	1007672	High	High
High	Master Protein	Q9CR41	Huntingtin-interacting protein K OS=Mus musculus OX=10090 GN=Hypk PE=1 SV=2	43	6	14.7	2.56466e+06	3.06086e+06	High	High
High	Master Protein	Q4VJB9	Insulin-like growth factor 1 isoform Eb OS=Mus musculus OX=10090 GN=Igf1 PE=1 SV=1	15	6	17.9	4.70104e+06	5.95337e+06	High	High
High	Master Protein	A0A1L1STE6	Isocitrate dehydrogenase [NAD] subunit, mitochondrial OS=Mus musculus OX=10090 GN=Idh3a PE=1 SV=1	10	6	41.5	1.18341e+06	1.05685e+06	High	High
High	Master Protein	Q71RI9	Kynurenine--oxoglutarate transaminase 3 OS=Mus musculus OX=10090 GN=Kyat3 PE=1 SV=1	10	6	51.1	1.31577e+06	1.35677e+06	High	High
High	Master Protein	Q9JHQ5	Leucine zipper transcription factor-like protein 1 OS=Mus musculus OX=10090 GN=Lztfl1 PE=1 SV=1	22	6	34.8		752759	High	High
High	Master Protein	P46737	Lys-63-specific deubiquitinase BRCC36 OS=Mus musculus OX=10090 GN=Brcc3 PE=1 SV=1	19	6	33.3	1.7302e+06	1.55347e+06	High	High
High	Master Protein	Q8BP40	Lysophosphatidic acid phosphatase type 6 OS=Mus musculus OX=10090 GN=Acp6 PE=1 SV=1	11	6	47.6	2.32949e+06	2.33233e+06	High	High
High	Master Protein	P70699	Lysosomal alpha-glucosidase OS=Mus musculus OX=10090 GN=Gaa PE=1 SV=2	5	6	106.2	7.14258e+06	1.01245e+06	High	High
High	Master Protein	P34884	Macrophage migration inhibitory factor OS=Mus musculus OX=10090 GN=Mif PE=1 SV=2	24	6	12.5	2.3903e+07	1.88907e+07	High	High
High	Master Protein	E9QN37	Macrophage-expressed gene 1 protein OS=Mus musculus OX=10090 GN=Mpeg1 PE=1 SV=1	7	6	79.1	2.22489e+06	2.10002e+06	High	High
High	Master Protein	Q922H4	Mannose-1-phosphate guanyltransferase alpha OS=Mus musculus OX=10090 GN=Gmppa PE=1 SV=1	12	6	46.2	1.58395e+06	1.2297e+06	High	High
High	Master Protein	P28667	MARCKS-related protein OS=Mus musculus OX=10090 GN=Marcksl1 PE=1 SV=2	48	6	20.2	4.09939e+06	4.07984e+06	High	High
High	Master Protein	Q8K310	Matrin-3 OS=Mus musculus OX=10090 GN=Matr3 PE=1 SV=1	6	6	94.6	2.53599e+06	2.14724e+06	High	High
High	Master Protein	Q9WVQ5	Methylthioribulose-1-phosphate dehydratase OS=Mus musculus OX=10090 GN=Apip PE=1 SV=1	22	6	26.9	1.76024e+06	1.77469e+06	High	High
High	Master Protein	Q9CQ92	Mitochondrial fission 1 protein OS=Mus musculus OX=10090 GN=Fis1 PE=1 SV=1	26	6	17	4444057	3.11934e+06	High	High
High	Master Protein	Q9D071	MMS19 nucleotide excision repair protein homolog OS=Mus musculus OX=10090 GN=Mms19 PE=1 SV=1	7	6	113	894294	688992	High	High
High	Master Protein	F7BJB9	MORC family CW-type zinc finger protein 3 OS=Mus musculus OX=10090 GN=Morc3 PE=1 SV=1	5	6	106.5	694198	702469	High	High
High	Master Protein	P62774	Myotrophin OS=Mus musculus OX=10090 GN=Mtpn PE=1 SV=2	35	6	12.9	8.37791e+06	7.33981e+06	High	High
High	Master Protein	P61600	N-alpha-acetyltransferase 20 OS=Mus musculus OX=10090 GN=Naa20 PE=1 SV=1	21	6	20.4	1.79008e+06	1.52253e+06	High	High
High	Master Protein	Q8C878	NEDD8-activating enzyme E1 catalytic subunit OS=Mus musculus OX=10090 GN=Uba3 PE=1 SV=2	5	6	51.7	1.21077e+06	849371	High	High
High	Master Protein	O35309	N-myc-interactor OS=Mus musculus OX=10090 GN=Nmi PE=1 SV=1	17	6	35.2	1.39602e+06	1.1876e+06	High	High
High	Master Protein	Q63850	Nuclear pore glycoprotein p62 OS=Mus musculus OX=10090 GN=Nup62 PE=1 SV=2	10	6	53.2	1.38818e+06	1.16938e+06	High	High
High	Master Protein	B9EJ86	Oxysterol-binding protein-related protein 8 OS=Mus musculus OX=10090 GN=Osbpl8 PE=1 SV=1	4	6	101.2	423177	492650	High	High
High	Master Protein	Q8CHP5	Partner of Y14 and mago OS=Mus musculus OX=10090 GN=Pym1 PE=1 SV=2	43	6	22.7	993898	892453	High	High
High	Master Protein	Q8BFV2	PCI domain-containing protein 2 OS=Mus musculus OX=10090 GN=Pcid2 PE=1 SV=1	20	6	46.1	1.16057e+06	1.04319e+06	High	High
High	Master Protein	A2BGI8	Peptidyl-prolyl cis-trans isomerase (Fragment) OS=Mus musculus OX=10090 GN=Ppih PE=1 SV=1	21	6	17.2	3.37567e+06	2.79849e+06	High	High
High	Master Protein	Q9D868	Peptidyl-prolyl cis-trans isomerase H OS=Mus musculus OX=10090 GN=Ppih PE=1 SV=1	24	6	20.5	816200	907340	High	High
High	Master Protein	Q9D0M1	Phosphoribosyl pyrophosphate synthase-associated protein 1 OS=Mus musculus OX=10090 GN=Prpsap1 PE=1 SV=1	23	6	39.4	868360	665868	High	High
High	Master Protein	G3UXL2	Phosphoribosyl pyrophosphate synthetase 1-like 3 OS=Mus musculus OX=10090 GN=Prps1l3 PE=3 SV=1	15	6	34.8	552437	505723	High	Peak Found
High	Master Protein	Q99LS3	Phosphoserine phosphatase OS=Mus musculus OX=10090 GN=Psph PE=1 SV=1	21	6	25.1	1.57708e+06	2.02192e+06	High	High
High	Master Protein	G3UYE5	Polyadenylate-binding protein-interacting protein 1 OS=Mus musculus OX=10090 GN=Paip1 PE=1 SV=1	8	6	47.2	3.2491e+06	3.31837e+06	High	High
High	Master Protein	Q03958	Prefoldin subunit 6 OS=Mus musculus OX=10090 GN=Pfdn6 PE=1 SV=1	28	6	14.4	7.58143e+06	6458929	High	High
High	Master Protein	P12815	Programmed cell death protein 6 OS=Mus musculus OX=10090 GN=Pdcd6 PE=1 SV=2	24	6	21.9	3.11821e+06	3.03709e+06	High	High
High	Master Protein	A0A0R4J049	Protein arginine N-methyltransferase 5 OS=Mus musculus OX=10090 GN=Prmt5 PE=1 SV=1	6	6	72.7	1.64981e+06	1.38438e+06	High	High
High	Master Protein	Q8R409	Protein HEXIM1 OS=Mus musculus OX=10090 GN=Hexim1 PE=1 SV=1	15	6	40.2	482287	505046	High	High
High	Master Protein	Q2EMV9	Protein mono-ADP-ribosyltransferase PARP14 OS=Mus musculus OX=10090 GN=Parp14 PE=1 SV=3	2	6	203.7	1.34377e+06	1.15198e+06	High	High
High	Master Protein	Q9DCL8	Protein phosphatase inhibitor 2 OS=Mus musculus OX=10090 GN=Ppp1r2 PE=1 SV=3	24	6	23.1	1.44077e+06	1.67576e+06	High	High
High	Master Protein	O70274	Protein tyrosine phosphatase type IVA 2 OS=Mus musculus OX=10090 GN=Ptp4a2 PE=1 SV=1	39	6	19.1	1.89787e+06	1.8974e+06	High	High
High	Master Protein	E9PXI0	Proto-oncogene vav OS=Mus musculus OX=10090 GN=Vav1 PE=1 SV=1	6	6	95.5	1.66555e+06	1.02573e+06	High	High
High	Master Protein	E9Q715	Putative RNA-binding protein Luc7-like 2 OS=Mus musculus OX=10090 GN=Luc7l2 PE=1 SV=1	14	6	32.6	899732	786541	High	High
High	Master Protein	D3Z783	RAC-alpha serine/threonine-protein kinase OS=Mus musculus OX=10090 GN=Akt1 PE=1 SV=2	14	6	50.9	1.48045e+06	928354	High	High
High	Master Protein	Q80ZV0	Ribonuclease H2 subunit B OS=Mus musculus OX=10090 GN=Rnaseh2b PE=1 SV=2	18	6	34.7	2.0142e+06	1.8283e+06	High	High
High	Master Protein	A0A140T8T4	Ribosomal protein L9, pseudogene 6 OS=Mus musculus OX=10090 GN=Rpl9-ps6 PE=4 SV=1	29	6	21.8	2.848e+06	2623273	High	High
High	Master Protein	Q8CH25	SAFB-like transcription modulator OS=Mus musculus OX=10090 GN=Sltm PE=1 SV=1	6	6	116.9	1.14436e+06	1.00746e+06	High	High
High	Master Protein	E9PX53	Serine/threonine-protein phosphatase 4 regulatory subunit 1 OS=Mus musculus OX=10090 GN=Ppp4r1 PE=1 SV=1	7	6	104.4	1.23752e+06	1.32234e+06	High	High
High	Master Protein	Q7TSI3	Serine/threonine-protein phosphatase 6 regulatory subunit 1 OS=Mus musculus OX=10090 GN=Ppp6r1 PE=1 SV=1	7	6	94.5	1.38278e+06	678117	High	High
High	Master Protein	P07724	Serum albumin OS=Mus musculus OX=10090 GN=Alb PE=1 SV=3	2	6	68.6	41162728	25202754	High	High
High	Master Protein	Q9R0P4	Small acidic protein OS=Mus musculus OX=10090 GN=Smap PE=1 SV=1	25	6	20	1.07567e+06	1.32344e+06	High	High
High	Master Protein	Q91YJ2	Sorting nexin-4 OS=Mus musculus OX=10090 GN=Snx4 PE=1 SV=1	13	6	51.7	1.9825e+06	1.89237e+06	High	High
High	Master Protein	Q7TNE3	Sperm-associated antigen 7 OS=Mus musculus OX=10090 GN=Spag7 PE=1 SV=1	26	6	25.9	2.10804e+06	1.61836e+06	High	High
High	Master Protein	Q8QZY9	Splicing factor 3B subunit 4 OS=Mus musculus OX=10090 GN=Sf3b4 PE=1 SV=1	11	6	44.3	5.39011e+06	5.6089e+06	High	High
High	Master Protein	Q9JLI8	Squamous cell carcinoma antigen recognized by T-cells 3 OS=Mus musculus OX=10090 GN=Sart3 PE=1 SV=1	8	6	109.6	1.45791e+06	1.08379e+06	High	High
High	Master Protein	Q80VJ2	Steroid receptor RNA activator 1 OS=Mus musculus OX=10090 GN=Sra1 PE=1 SV=3	29	6	25.5	2.68658e+06	3.52436e+06	High	High
High	Master Protein	O55106	Striatin OS=Mus musculus OX=10090 GN=Strn PE=1 SV=2	12	6	85.9	2.88877e+06	2.51179e+06	High	High
High	Master Protein	Q91VZ6	Stromal membrane-associated protein 1 OS=Mus musculus OX=10090 GN=Smap1 PE=1 SV=1	10	6	47.6	3.56584e+06	2356405	High	High
High	Master Protein	Q7TN29	Stromal membrane-associated protein 2 OS=Mus musculus OX=10090 GN=Smap2 PE=1 SV=1	17	6	46.5	4.19618e+06	3.91009e+06	High	High
High	Master Protein	P20108	Thioredoxin-dependent peroxide reductase, mitochondrial OS=Mus musculus OX=10090 GN=Prdx3 PE=1 SV=1	27	6	28.1	5.55744e+06	4.81853e+06	High	High
High	Master Protein	Q3UDK1	TRAF-type zinc finger domain-containing protein 1 OS=Mus musculus OX=10090 GN=Trafd1 PE=1 SV=1	7	6	64.2	494565	525410	High	High
High	Master Protein	Q8K003	Translation machinery-associated protein 7 OS=Mus musculus OX=10090 GN=Tma7 PE=3 SV=1	42	6	7.1	8.85361e+06	8.18758e+06	High	High
High	Master Protein	O89023	Tripeptidyl-peptidase 1 OS=Mus musculus OX=10090 GN=Tpp1 PE=1 SV=2	22	6	61.3	3.97641e+06	5076728	High	High
High	Master Protein	Q6P3D0	U8 snoRNA-decapping enzyme OS=Mus musculus OX=10090 GN=Nudt16 PE=1 SV=1	16	6	21.8	1.15908e+06	956638	High	High
High	Master Protein	Q99NB8	Ubiquilin-4 OS=Mus musculus OX=10090 GN=Ubqln4 PE=1 SV=1	7	6	63.5	375576	329442	High	High
High	Master Protein	Q76LS9	Ubiquitin carboxyl-terminal hydrolase MINDY-1 OS=Mus musculus OX=10090 GN=Mindy1 PE=1 SV=1	13	6	51.2	1.45409e+06	1.11105e+06	High	High
High	Master Protein	P70362	Ubiquitin recognition factor in ER-associated degradation protein 1 OS=Mus musculus OX=10090 GN=Ufd1 PE=1 SV=2	12	6	34.5	2.85929e+06	2.06122e+06	High	High
High	Master Protein	Q8VE47	Ubiquitin-like modifier-activating enzyme 5 OS=Mus musculus OX=10090 GN=Uba5 PE=1 SV=2	17	6	44.8	2.26461e+06	1.68963e+06	High	High
High	Master Protein	Q8R307	Vacuolar protein sorting-associated protein 18 homolog OS=Mus musculus OX=10090 GN=Vps18 PE=1 SV=2	5	6	110.1	1.81138e+06	1.50408e+06	High	High
High	Master Protein	Q3UVL4	Vacuolar protein sorting-associated protein 51 homolog OS=Mus musculus OX=10090 GN=Vps51 PE=1 SV=2	5	6	86.1	999982	845240	High	High
High	Master Protein	Q8R164	Valacyclovir hydrolase OS=Mus musculus OX=10090 GN=Bphl PE=1 SV=1	18	6	32.8	2.61595e+06	1.77433e+06	High	High
High	Master Protein	P61965	WD repeat-containing protein 5 OS=Mus musculus OX=10090 GN=Wdr5 PE=1 SV=1	14	6	36.6	1.60879e+06	1.37288e+06	High	High
High	Master Protein	P97765	WW domain-binding protein 2 OS=Mus musculus OX=10090 GN=Wbp2 PE=1 SV=1	13	6	28	3.34436e+06	2888394	High	High
High	Master Protein	Q6NZF1	Zinc finger CCCH domain-containing protein 11A OS=Mus musculus OX=10090 GN=Zc3h11a PE=1 SV=1	8	6	86.4	1.71054e+06	1475726	High	High
High	Master Protein	D3Z5I1	Zinc finger CCCH-type antiviral protein 1 OS=Mus musculus OX=10090 GN=Zc3hav1 PE=1 SV=1	5	6	112.5	802779	566779	High	High
High	Master Protein	Q9DB15	39S ribosomal protein L12, mitochondrial OS=Mus musculus OX=10090 GN=Mrpl12 PE=1 SV=2	24	5	21.7	653904	583215	High	High
High	Master Protein	P63276	40S ribosomal protein S17 OS=Mus musculus OX=10090 GN=Rps17 PE=1 SV=2	30	5	15.5	2.32579e+06	3.78502e+06	High	High
High	Master Protein	G3UYV7	40S ribosomal protein S28 (Fragment) OS=Mus musculus OX=10090 GN=Rps28 PE=1 SV=1	57	5	6.3	2.37986e+07	2.0824e+07	High	High
High	Master Protein	Q9CQM8	60S ribosomal protein L21 OS=Mus musculus OX=10090 GN=Rpl21 PE=1 SV=1	21	5	18.6	2.81741e+06	2.26834e+06	High	High
High	Master Protein	P62830	60S ribosomal protein L23 OS=Mus musculus OX=10090 GN=Rpl23 PE=1 SV=1	32	5	14.9	3.3402e+06	2.70042e+06	High	High
High	Master Protein	P62751	60S ribosomal protein L23a OS=Mus musculus OX=10090 GN=Rpl23a PE=1 SV=1	26	5	17.7	1.3572e+07	1.49938e+07	High	High
High	Master Protein	Q8BP67	60S ribosomal protein L24 OS=Mus musculus OX=10090 GN=Rpl24 PE=1 SV=2	19	5	17.8	6.59245e+06	6.04419e+06	High	High
High	Master Protein	P62918	60S ribosomal protein L8 OS=Mus musculus OX=10090 GN=Rpl8 PE=1 SV=2	11	5	28	2.75797e+06	2.47296e+06	High	High
High	Master Protein	Q5SWU9	Acetyl-CoA carboxylase 1 OS=Mus musculus OX=10090 GN=Acaca PE=1 SV=1	1	5	265.1	829688	582833	High	High
High	Master Protein	O55137	Acyl-coenzyme A thioesterase 1 OS=Mus musculus OX=10090 GN=Acot1 PE=1 SV=1	14	5	46.1	1.70779e+06	1.57143e+06	High	High
High	Master Protein	E9QJT5	Acylphosphatase OS=Mus musculus OX=10090 GN=Acyp1 PE=1 SV=1	25	5	17.3	3.9183e+06	3.17305e+06	High	High
High	Master Protein	J3QP56	Acyl-protein thioesterase 1 OS=Mus musculus OX=10090 GN=Lypla1 PE=1 SV=1	23	5	23.7	3.98065e+06	3.72579e+06	High	High
High	Master Protein	Q9WUL7	ADP-ribosylation factor-like protein 3 OS=Mus musculus OX=10090 GN=Arl3 PE=1 SV=1	23	5	20.5	1.69694e+06	1.44629e+06	High	High
High	Master Protein	Q9QYC0	Alpha-adducin OS=Mus musculus OX=10090 GN=Add1 PE=1 SV=2	7	5	80.6	1.38557e+06	1.27701e+06	High	High
High	Master Protein	Q8R2V5	Arf-GAP with dual PH domain-containing protein 2 OS=Mus musculus OX=10090 GN=Adap2 PE=1 SV=1	7	5	44	1.15516e+06	990976	High	High
High	Master Protein	P28658	Ataxin-10 OS=Mus musculus OX=10090 GN=Atxn10 PE=1 SV=2	12	5	53.7	631118	1.57584e+06	High	High
High	Master Protein	J3QNU6	Beta-arrestin-1 OS=Mus musculus OX=10090 GN=Arrb1 PE=1 SV=1	11	5	47.1	3.19276e+06	1.50655e+06	High	High
High	Master Protein	Q9CWL8	Beta-catenin-like protein 1 OS=Mus musculus OX=10090 GN=Ctnnbl1 PE=1 SV=1	5	5	64.9	1.20589e+06	970821	High	High
High	Master Protein	Q9CWI3	BRCA2 and CDKN1A-interacting protein OS=Mus musculus OX=10090 GN=Bccip PE=1 SV=1	17	5	35.9	1.18024e+06	991096	High	High
High	Master Protein	Q9CR86	Calcium-regulated heat stable protein 1 OS=Mus musculus OX=10090 GN=Carhsp1 PE=1 SV=1	31	5	16.1	5.3262e+06	3.75595e+06	High	High
High	Master Protein	P56212	cAMP-regulated phosphoprotein 19 OS=Mus musculus OX=10090 GN=Arpp19 PE=1 SV=2	45	5	12.3	1.46601e+06	1.92322e+06	High	High
High	Master Protein	Q3UZA1	CapZ-interacting protein OS=Mus musculus OX=10090 GN=Rcsd1 PE=1 SV=1	14	5	44.1	1.61162e+06	1.65261e+06	High	High
High	Master Protein	Q8BM88	Cathepsin O OS=Mus musculus OX=10090 GN=Ctso PE=2 SV=1	14	5	34.7	1.36986e+06	1.27095e+06	High	High
High	Master Protein	F7C0H6	CB1 cannabinoid receptor-interacting protein 1 (Fragment) OS=Mus musculus OX=10090 GN=Cnrip1 PE=1 SV=1	14	5	20.7	1.4463e+06	932244	High	High
High	Master Protein	Q8BI72	CDKN2A-interacting protein OS=Mus musculus OX=10090 GN=Cdkn2aip PE=1 SV=1	8	5	59.7	2.86562e+06	2.57067e+06	High	High
High	Master Protein	Q8VDP4	Cell cycle and apoptosis regulator protein 2 OS=Mus musculus OX=10090 GN=Ccar2 PE=1 SV=2	4	5	102.9	1.37257e+06	1.32379e+06	High	High
High	Master Protein	A0A2R8VK76	Cleavage and polyadenylation-specificity factor subunit 1 OS=Mus musculus OX=10090 GN=Cpsf1 PE=1 SV=1	2	5	161.7	1.86338e+06	1.41009e+06	High	High
High	Master Protein	Q99LC2	Cleavage stimulation factor subunit 1 OS=Mus musculus OX=10090 GN=Cstf1 PE=1 SV=1	18	5	48.4	852355	755140	High	High
High	Master Protein	F8WHU7	Cohesin subunit SA-1 OS=Mus musculus OX=10090 GN=Stag1 PE=1 SV=1	4	5	140	291139	235996	High	High
High	Master Protein	F6XC25	Coiled-coil and C2 domain-containing protein 1B (Fragment) OS=Mus musculus OX=10090 GN=Cc2d1b PE=1 SV=1	10	5	85	3.83009e+06	2.954e+06	High	High
High	Master Protein	Q8R3Q6	Coiled-coil domain-containing protein 58 OS=Mus musculus OX=10090 GN=Ccdc58 PE=1 SV=1	28	5	16.7	2.29093e+06	2.23766e+06	High	High
High	Master Protein	Q8VI86	COMM domain-containing protein 1 OS=Mus musculus OX=10090 GN=Commd1 PE=1 SV=1	18	5	26.8	1.31945e+06	1.01131e+06	High	High
High	Master Protein	Q8BXC6	COMM domain-containing protein 2 OS=Mus musculus OX=10090 GN=Commd2 PE=1 SV=1	13	5	22.8	3.96891e+06	2.7341e+06	High	High
High	Master Protein	A0A0R4J0U7	COMM domain-containing protein 5 OS=Mus musculus OX=10090 GN=Commd5 PE=1 SV=1	21	5	24.5	1726152	1.13195e+06	High	High
High	Master Protein	Q8BG94	COMM domain-containing protein 7 OS=Mus musculus OX=10090 GN=Commd7 PE=1 SV=1	25	5	22.6	2.96388e+06	2.34945e+06	High	High
High	Master Protein	Q8BV13	COP9 signalosome complex subunit 7b OS=Mus musculus OX=10090 GN=Cops7b PE=1 SV=1	18	5	29.7	689249	496071	High	High
High	Master Protein	P56546	C-terminal-binding protein 2 OS=Mus musculus OX=10090 GN=Ctbp2 PE=1 SV=2	9	5	48.9	2.36209e+06	2.23143e+06	High	High
High	Master Protein	Q9D5V5	Cullin-5 OS=Mus musculus OX=10090 GN=Cul5 PE=1 SV=3	5	5	90.9	875887	692029	High	High
High	Master Protein	P97377	Cyclin-dependent kinase 2 OS=Mus musculus OX=10090 GN=Cdk2 PE=1 SV=2	20	5	39	1.17345e+06	1.07367e+06	High	High
High	Master Protein	P46414	Cyclin-dependent kinase inhibitor 1B OS=Mus musculus OX=10090 GN=Cdkn1b PE=1 SV=2	24	5	22.2	508199	515116	High	High
High	Master Protein	P63254	Cysteine-rich protein 1 OS=Mus musculus OX=10090 GN=Crip1 PE=1 SV=2	21	5	8.5	11261431	1.16585e+07	High	High
High	Master Protein	Q3U1Y4	DENN domain-containing protein 4B OS=Mus musculus OX=10090 GN=Dennd4b PE=1 SV=2	3	5	164.6	1.06197e+06	801604	High	High
High	Master Protein	E9QMK9	D-glutamate cyclase, mitochondrial OS=Mus musculus OX=10090 GN=Dglucy PE=1 SV=1	7	5	69.9	226573		High	High
High	Master Protein	Q9JI46	Diphosphoinositol polyphosphate phosphohydrolase 1 OS=Mus musculus OX=10090 GN=Nudt3 PE=1 SV=1	26	5	19	1.8935e+06	1.70222e+06	High	High
High	Master Protein	O88839	Disintegrin and metalloproteinase domain-containing protein 15 OS=Mus musculus OX=10090 GN=Adam15 PE=1 SV=2	5	5	92.6	1.61558e+06	1659236	High	High
High	Master Protein	Q8CFI7	DNA-directed RNA polymerase II subunit RPB2 OS=Mus musculus OX=10090 GN=Polr2b PE=1 SV=2	5	5	133.8	513535	403022	High	High
High	Master Protein	Q9Z1K5	E3 ubiquitin-protein ligase ARIH1 OS=Mus musculus OX=10090 GN=Arih1 PE=1 SV=3	8	5	64	2.80433e+06	2.26092e+06	High	High
High	Master Protein	G3UZ30	E3 ubiquitin-protein ligase PPP1R11 (Fragment) OS=Mus musculus OX=10090 GN=Ppp1r11 PE=1 SV=2	37	5	13.8	991068	704501	High	High
High	Master Protein	F8WJ93	Echinoderm microtubule-associated protein-like 4 OS=Mus musculus OX=10090 GN=Eml4 PE=1 SV=1	5	5	109.9	5.67194e+06	5.5283e+06	High	High
High	Master Protein	Q9DCW4	Electron transfer flavoprotein subunit beta OS=Mus musculus OX=10090 GN=Etfb PE=1 SV=3	17	5	27.6	803788	526092	High	High
High	Master Protein	Q7TT37	Elongator complex protein 1 OS=Mus musculus OX=10090 GN=Elp1 PE=1 SV=2	4	5	149.5	136389	116819	High	High
High	Master Protein	Q9JK48	Endophilin-B1 OS=Mus musculus OX=10090 GN=Sh3glb1 PE=1 SV=1	14	5	40.8	4.26412e+06	2.33496e+06	High	High
High	Master Protein	B1AUN2	Eukaryotic translation initiation factor 2B, subunit 3 OS=Mus musculus OX=10090 GN=Eif2b3 PE=1 SV=1	7	5	50.5	1.02827e+06	784036	High	High
High	Master Protein	Q9JHI7	Exosome complex component RRP45 OS=Mus musculus OX=10090 GN=Exosc9 PE=1 SV=1	8	5	48.9	937667	831444	High	High
High	Master Protein	Q9CSH3	Exosome complex exonuclease RRP44 OS=Mus musculus OX=10090 GN=Dis3 PE=1 SV=4	5	5	108.8	1337582	1.07176e+06	High	High
High	Master Protein	Q9ESJ0	Exportin-4 OS=Mus musculus OX=10090 GN=Xpo4 PE=1 SV=2	5	5	129.9	488479	396032	High	High
High	Master Protein	Q61160	FAS-associated death domain protein OS=Mus musculus OX=10090 GN=Fadd PE=1 SV=1	21	5	22.9	1.76287e+06	1.52655e+06	High	High
High	Master Protein	Q9QXE7	F-box-like/WD repeat-containing protein TBL1X OS=Mus musculus OX=10090 GN=Tbl1x PE=1 SV=2	8	5	56.8	728058	747124	High	High
High	Master Protein	Q6AXB7	Fragile X mental retardation syndrome 1 homolog OS=Mus musculus OX=10090 GN=Fmr1 PE=1 SV=1	7	5	68.8	710154	806515	High	High
High	Master Protein	Q8BZA9	Fructose-2,6-bisphosphatase TIGAR OS=Mus musculus OX=10090 GN=Tigar PE=1 SV=1	16	5	29.2	7.74759e+06	6.85886e+06	High	High
High	Master Protein	Q6PGG2	GEM-interacting protein OS=Mus musculus OX=10090 GN=Gmip PE=1 SV=1	6	5	107.5	145338	140904	High	High
High	Master Protein	Q9D172	Glutamine amidotransferase-like class 1 domain-containing protein 3A, mitochondrial OS=Mus musculus OX=10090 GN=Gatd3a PE=1 SV=1	24	5	28.1	2.34331e+06	1.85282e+06	High	High
High	Master Protein	Q9CRA5	Golgi phosphoprotein 3 OS=Mus musculus OX=10090 GN=Golph3 PE=1 SV=1	21	5	33.7	6.21742e+06	8.21505e+06	High	High
High	Master Protein	F6YUI5	H/ACA ribonucleoprotein complex subunit DKC1 (Fragment) OS=Mus musculus OX=10090 GN=Dkc1 PE=1 SV=1	38	5	20.8	367351	319988	Peak Found	High
High	Master Protein	Q99KB8	Hydroxyacylglutathione hydrolase, mitochondrial OS=Mus musculus OX=10090 GN=Hagh PE=1 SV=2	15	5	34.1	1.18295e+06	1.03935e+06	High	High
High	Master Protein	A0A0G2JFJ6	Integrator complex subunit 3 OS=Mus musculus OX=10090 GN=Ints3 PE=1 SV=1	8	5	117.2	979427	823783	High	High
High	Master Protein	O55222	Integrin-linked protein kinase OS=Mus musculus OX=10090 GN=Ilk PE=1 SV=2	4	5	51.3	805781	489729	High	High
High	Master Protein	P13597	Intercellular adhesion molecule 1 OS=Mus musculus OX=10090 GN=Icam1 PE=1 SV=1	8	5	58.8	2.15984e+06	1.8681e+06	High	High
High	Master Protein	P11438	Lysosome-associated membrane glycoprotein 1 OS=Mus musculus OX=10090 GN=Lamp1 PE=1 SV=2	6	5	43.8	3.56491e+06	2.87847e+06	High	High
High	Master Protein	Q9CQC8	Maspardin OS=Mus musculus OX=10090 GN=Spg21 PE=1 SV=1	19	5	34.9	1.10234e+06	616979	High	High
High	Master Protein	A6H5Y3	Methionine synthase OS=Mus musculus OX=10090 GN=Mtr PE=1 SV=1	4	5	139	1.00662e+06	816833	High	High
High	Master Protein	Q9D0L8	mRNA cap guanine-N7 methyltransferase OS=Mus musculus OX=10090 GN=Rnmt PE=1 SV=1	14	5	53.3	1.91293e+06	1.74633e+06	High	High
High	Master Protein	Q9D0I8	mRNA turnover protein 4 homolog OS=Mus musculus OX=10090 GN=Mrto4 PE=1 SV=1	19	5	27.5	1.18781e+06	1.21238e+06	High	High
High	Master Protein	Q9Z222	N-acetyllactosaminide beta-1,3-N-acetylglucosaminyltransferase 2 OS=Mus musculus OX=10090 GN=B3GNT2 PE=1 SV=3	8	5	45.9	1.51921e+06	2.14293e+06	High	High
High	Master Protein	Q05DV1	NADPH--cytochrome P450 reductase OS=Mus musculus OX=10090 GN=Por PE=1 SV=1	4	5	72.9	1.71645e+06	1.32697e+06	High	High
High	Master Protein	Q6PGB6	N-alpha-acetyltransferase 50 OS=Mus musculus OX=10090 GN=Naa50 PE=1 SV=1	27	5	19.4	3.26579e+06	3.48918e+06	High	High
High	Master Protein	Q9D0T1	NHP2-like protein 1 OS=Mus musculus OX=10090 GN=Snu13 PE=1 SV=4	24	5	14.2	2.19176e+06	1.80718e+06	High	High
High	Master Protein	D3YU12	NmrA-like family domain-containing protein 1 OS=Mus musculus OX=10090 GN=Nmral1 PE=1 SV=1	24	5	33.1	2.66165e+06	2.35657e+06	High	High
High	Master Protein	P18608	Non-histone chromosomal protein HMG-14 OS=Mus musculus OX=10090 GN=Hmgn1 PE=1 SV=2	53	5	10.1	667227	857921	High	High
High	Master Protein	Q9JIH2	Nuclear pore complex protein Nup50 OS=Mus musculus OX=10090 GN=Nup50 PE=1 SV=3	8	5	49.5	1.45629e+06	1.10151e+06	High	High
High	Master Protein	P81117	Nucleobindin-2 OS=Mus musculus OX=10090 GN=Nucb2 PE=1 SV=2	10	5	50.3	479143	611307	High	High
High	Master Protein	A0A286YDA2	Nucleolar and coiled-body phosphoprotein 1 OS=Mus musculus OX=10090 GN=Nolc1 PE=1 SV=1	6	5	73.4	852016	739625	High	High
High	Master Protein	Q6PIP5	NudC domain-containing protein 1 OS=Mus musculus OX=10090 GN=Nudcd1 PE=1 SV=2	6	5	66.7	1.05007e+06	923868	High	High
High	Master Protein	Q9D8S4	Oligoribonuclease, mitochondrial OS=Mus musculus OX=10090 GN=Rexo2 PE=1 SV=2	24	5	26.7	2.44181e+06	2.6121e+06	High	High
High	Master Protein	Q9QUR7	Peptidyl-prolyl cis-trans isomerase NIMA-interacting 1 OS=Mus musculus OX=10090 GN=Pin1 PE=1 SV=1	28	5	18.4	4.34097e+06	3.90488e+06	High	High
High	Master Protein	Q9CQF7	Prefoldin 1 OS=Mus musculus OX=10090 GN=Pfdn1 PE=1 SV=1	43	5	14.2	1.19455e+06	2.24849e+06	High	High
High	Master Protein	A0A1B0GRU8	Pre-mRNA-processing factor 40 homolog A OS=Mus musculus OX=10090 GN=Prpf40a PE=1 SV=1	4	5	105.5	767986	668768	High	High
High	Master Protein	Q99KN2	Probable cytosolic iron-sulfur protein assembly protein CIAO1 OS=Mus musculus OX=10090 GN=Ciao1 PE=1 SV=1	12	5	37.6	1.40893e+06	1.93402e+06	High	High
High	Master Protein	Q9CZH3	Proteasome assembly chaperone 3 OS=Mus musculus OX=10090 GN=Psmg3 PE=1 SV=1	40	5	13.3	1.9028e+06	1.71864e+06	High	High
High	Master Protein	Q8CJG1	Protein argonaute-1 OS=Mus musculus OX=10090 GN=Ago1 PE=1 SV=2	4	5	97.2	264473	309292	High	High
High	Master Protein	Q9EQQ9	Protein O-GlcNAcase OS=Mus musculus OX=10090 GN=Oga PE=1 SV=2	4	5	103.1	1.71679e+06	1.37286e+06	High	High
High	Master Protein	Q8BVQ5	Protein phosphatase methylesterase 1 OS=Mus musculus OX=10090 GN=Ppme1 PE=1 SV=5	13	5	42.2	2.14605e+06	1.95925e+06	High	High
High	Master Protein	Q3UPH1	Protein PRRC1 OS=Mus musculus OX=10090 GN=Prrc1 PE=1 SV=1	13	5	46.3	1.99607e+06	2.01156e+06	High	High
High	Master Protein	Q9QYS9	Protein quaking OS=Mus musculus OX=10090 GN=Qki PE=1 SV=1	14	5	37.6	1.80678e+06	1.56356e+06	High	High
High	Master Protein	P50543	Protein S100-A11 OS=Mus musculus OX=10090 GN=S100a11 PE=1 SV=1	30	5	11.1	1.0609e+07	1.09098e+07	High	High
High	Master Protein	Q9D1M0	Protein SEC13 homolog OS=Mus musculus OX=10090 GN=Sec13 PE=1 SV=3	16	5	35.5	1.59818e+06	1.58895e+06	High	High
High	Master Protein	A2AIV2	Protein virilizer homolog OS=Mus musculus OX=10090 GN=Virma PE=1 SV=1	2	5	201.3	288735	305541	High	High
High	Master Protein	Q9EPK2	Protein XRP2 OS=Mus musculus OX=10090 GN=Rp2 PE=1 SV=3	12	5	39.4	5.60684e+06	4.16731e+06	High	High
High	Master Protein	A0A0R4J034	Pyridoxal-dependent decarboxylase domain-containing protein 1 OS=Mus musculus OX=10090 GN=Pdxdc1 PE=1 SV=1	8	5	87.4	2.37129e+06	1.74373e+06	High	High
High	Master Protein	Q9ESW8	Pyroglutamyl-peptidase 1 OS=Mus musculus OX=10090 GN=Pgpep1 PE=1 SV=1	28	5	22.9	1.60564e+06	1.07478e+06	High	High
High	Master Protein	Q9DCC4	Pyrroline-5-carboxylate reductase 3 OS=Mus musculus OX=10090 GN=Pycr3 PE=1 SV=2	16	5	28.7	3.8479e+06	3.36357e+06	High	High
High	Master Protein	A2AWA9	Rab GTPase-activating protein 1 OS=Mus musculus OX=10090 GN=Rabgap1 PE=1 SV=1	5	5	120.7	831155	508982	High	High
High	Master Protein	Q6A0D4	Raftlin OS=Mus musculus OX=10090 GN=Rftn1 PE=1 SV=4	6	5	61.5	603855	381411	High	High
High	Master Protein	F6R6F1	RalBP1-associated Eps domain-containing protein 1 (Fragment) OS=Mus musculus OX=10090 GN=Reps1 PE=1 SV=1	5	5	81.9	805994	602440	High	High
High	Master Protein	P06800	Receptor-type tyrosine-protein phosphatase C OS=Mus musculus OX=10090 GN=Ptprc PE=1 SV=4	4	5	144.7	1.59039e+06	1.76612e+06	High	High
High	Master Protein	Q5SWN2	Replication protein A subunit OS=Mus musculus OX=10090 GN=Rpa1 PE=1 SV=2	9	5	71.4	880226	834352	High	High
High	Master Protein	A0A0R4J2B6	Retinoblastoma-binding protein 5 OS=Mus musculus OX=10090 GN=Rbbp5 PE=1 SV=1	6	5	59	1.77475e+06	1.36873e+06	High	High
High	Master Protein	E9PYS6	Rho GTPase-activating protein 4 OS=Mus musculus OX=10090 GN=Arhgap4 PE=1 SV=1	7	5	95.2	434775	375054	High	High
High	Master Protein	Q8QZW8	Rho GTPase-activating protein 9 OS=Mus musculus OX=10090 GN=Arhgap9 PE=1 SV=2	13	5	53.1	1.86072e+06	1.27738e+06	High	High
High	Master Protein	Q9CWY8	Ribonuclease H2 subunit A OS=Mus musculus OX=10090 GN=Rnaseh2a PE=1 SV=2	23	5	33.5	2.29819e+06	1.70516e+06	High	High
High	Master Protein	Q9CW46	Ribonucleoprotein PTB-binding 1 OS=Mus musculus OX=10090 GN=Raver1 PE=1 SV=2	10	5	79.3	869492	684334	High	High
High	Master Protein	Q9D706	RNA polymerase II-associated protein 3 OS=Mus musculus OX=10090 GN=Rpap3 PE=1 SV=1	8	5	74.1	275219	602596	High	High
High	Master Protein	Q64105	Sepiapterin reductase OS=Mus musculus OX=10090 GN=Spr PE=1 SV=1	22	5	27.9	2.59342e+06	2.27618e+06	High	High
High	Master Protein	W4VSP4	Serine (or cysteine) peptidase inhibitor, clade B, member 6c OS=Mus musculus OX=10090 GN=Serpinb6c PE=1 SV=1	9	5	42.9	64371.8	60123.5	High	Peak Found
High	Master Protein	Q9CZN7	Serine hydroxymethyltransferase, mitochondrial OS=Mus musculus OX=10090 GN=Shmt2 PE=1 SV=1	8	5	55.7	2.84562e+06	3.55733e+06	High	High
High	Master Protein	Q0VGB7	Serine/threonine-protein phosphatase 4 regulatory subunit 2 OS=Mus musculus OX=10090 GN=Ppp4r2 PE=1 SV=1	13	5	46.5	868360	771494	High	High
High	Master Protein	B2RXR6	Serine/threonine-protein phosphatase 6 regulatory ankyrin repeat subunit B OS=Mus musculus OX=10090 GN=Ankrd44 PE=1 SV=1	7	5	107.3	1.12688e+06	826730	High	High
High	Master Protein	P16254	Signal recognition particle 14 kDa protein OS=Mus musculus OX=10090 GN=Srp14 PE=1 SV=1	34	5	12.5	1.80836e+06	1.48086e+06	High	High
High	Master Protein	P70297	Signal transducing adapter molecule 1 OS=Mus musculus OX=10090 GN=Stam PE=1 SV=3	10	5	59.7	796654	738471	High	High
High	Master Protein	A0A0R4J0K5	SLAM family member 5 OS=Mus musculus OX=10090 GN=Cd84 PE=1 SV=1	18	5	37.3	798426	869469	High	High
High	Master Protein	Q8BHK6	SLAM family member 7 OS=Mus musculus OX=10090 GN=Slamf7 PE=1 SV=2	17	5	37.2	2.53687e+06	2.44169e+06	High	High
High	Master Protein	P62307	Small nuclear ribonucleoprotein F OS=Mus musculus OX=10090 GN=Snrpf PE=1 SV=1	22	5	9.7	3.30461e+06	3.06876e+06	High	High
High	Master Protein	P62309	Small nuclear ribonucleoprotein G OS=Mus musculus OX=10090 GN=Snrpg PE=1 SV=1	26	5	8.5	1.78364e+07	1.86213e+07	High	High
High	Master Protein	Q9CQ65	S-methyl-5'-thioadenosine phosphorylase OS=Mus musculus OX=10090 GN=Mtap PE=1 SV=1	18	5	31	4.58305e+06	4.17676e+06	High	High
High	Master Protein	Q8VCF1	Soluble calcium-activated nucleotidase 1 OS=Mus musculus OX=10090 GN=Cant1 PE=2 SV=1	8	5	45.6	1.84791e+06	1.44975e+06	High	High
High	Master Protein	E9PX59	Sterile alpha motif domain-containing protein 9-like OS=Mus musculus OX=10090 GN=Samd9l PE=1 SV=1	3	5	182.1	306372	265651	High	High
High	Master Protein	Q9Z0H3	SWI/SNF-related matrix-associated actin-dependent regulator of chromatin subfamily B member 1 OS=Mus musculus OX=10090 GN=Smarcb1 PE=1 SV=1	10	5	44.1	1.47331e+06	1.22094e+06	High	High
High	Master Protein	Q9D5V6	Synapse-associated protein 1 OS=Mus musculus OX=10090 GN=Syap1 PE=1 SV=1	12	5	41.3	346296	421933	High	High
High	Master Protein	Q8CI71	Syndetin OS=Mus musculus OX=10090 GN=Vps50 PE=1 SV=2	5	5	111.1	740494	425386	High	High
High	Master Protein	Q3TIR3	Synembryn-A OS=Mus musculus OX=10090 GN=Ric8a PE=1 SV=2	9	5	59.8	876905	845292	High	High
High	Master Protein	Q9D735	Telomerase RNA component interacting RNase OS=Mus musculus OX=10090 GN=Trir PE=1 SV=1	27	5	18.4	903074	345830	High	High
High	Master Protein	Q5SSZ5	Tensin-3 OS=Mus musculus OX=10090 GN=Tns3 PE=1 SV=1	4	5	155.5	1.90532e+06	1.87806e+06	High	High
High	Master Protein	Q91XB0	Three-prime repair exonuclease 1 OS=Mus musculus OX=10090 GN=Trex1 PE=1 SV=2	14	5	33.7	2.51999e+06	2.00095e+06	High	High
High	Master Protein	P62996	Transformer-2 protein homolog beta OS=Mus musculus OX=10090 GN=Tra2b PE=1 SV=1	13	5	33.6	1.5223e+06	1.83401e+06	High	High
High	Master Protein	Q61749	Translation initiation factor eIF-2B subunit delta OS=Mus musculus OX=10090 GN=Eif2b4 PE=1 SV=2	10	5	57.6	1.79488e+06	1.43474e+06	High	High
High	Master Protein	Q8CHW4	Translation initiation factor eIF-2B subunit epsilon OS=Mus musculus OX=10090 GN=Eif2b5 PE=1 SV=1	5	5	80	1.72243e+06	1.43005e+06	High	High
High	Master Protein	Q60805	Tyrosine-protein kinase Mer OS=Mus musculus OX=10090 GN=Mertk PE=1 SV=1	5	5	110.1	2.05668e+06	2.21395e+06	High	High
High	Master Protein	Q6ZWM4	U6 snRNA-associated Sm-like protein LSm8 OS=Mus musculus OX=10090 GN=Lsm8 PE=1 SV=3	53	5	10.4	3.78893e+06	3.54378e+06	High	High
High	Master Protein	E9PV45	Ubiquitin carboxyl-terminal hydrolase 24 OS=Mus musculus OX=10090 GN=Usp24 PE=1 SV=1	2	5	293.9	398922	241368	High	High
High	Master Protein	Q78JW9	Ubiquitin domain-containing protein UBFD1 OS=Mus musculus OX=10090 GN=Ubfd1 PE=1 SV=2	12	5	40.1	3.76062e+06	3.3573e+06	High	High
High	Master Protein	Q99PL6	UBX domain-containing protein 6 OS=Mus musculus OX=10090 GN=Ubxn6 PE=1 SV=1	14	5	49.8	447154	105337	High	High
High	Master Protein	Q8VD62	UPF0696 protein C11orf68 homolog OS=Mus musculus OX=10090 GN=Bles03 PE=1 SV=2	15	5	31.8	3.76691e+06	3.36335e+06	High	High
High	Master Protein	Q91XD6	Vacuolar protein-sorting-associated protein 36 OS=Mus musculus OX=10090 GN=Vps36 PE=1 SV=1	12	5	43.7	1.10406e+06	1.20221e+06	High	High
High	Master Protein	O89116	Vesicle transport through interaction with t-SNAREs homolog 1A OS=Mus musculus OX=10090 GN=Vti1a PE=1 SV=1	21	5	25	586323	296732	High	High
High	Master Protein	Q9QY76	Vesicle-associated membrane protein-associated protein B OS=Mus musculus OX=10090 GN=Vapb PE=1 SV=3	12	5	26.9	2.52068e+06	1.91213e+06	High	High
High	Master Protein	O08547	Vesicle-trafficking protein SEC22b OS=Mus musculus OX=10090 GN=Sec22b PE=1 SV=3	20	5	24.7	486117	323565	High	High
High	Master Protein	Q8BUB4	WD repeat and FYVE domain-containing protein 2 OS=Mus musculus OX=10090 GN=Wdfy2 PE=1 SV=2	10	5	45.1	1.64113e+06	1.36608e+06	High	High
High	Master Protein	Q923D5	WW domain-binding protein 11 OS=Mus musculus OX=10090 GN=Wbp11 PE=1 SV=2	6	5	69.8	2.8849e+06	2.37606e+06	High	High
High	Master Protein	P59326	YTH domain-containing family protein 1 OS=Mus musculus OX=10090 GN=Ythdf1 PE=1 SV=1	8	5	60.8	407699	494596	High	High
High	Master Protein	A0A571BEH5	Zinc finger protein Eos OS=Mus musculus OX=10090 GN=Ikzf4 PE=1 SV=1	5	5	58.9	372756	418621	High	High
High	Master Protein	Q99JT9	1,2-dihydroxy-3-keto-5-methylthiopentene dioxygenase OS=Mus musculus OX=10090 GN=Adi1 PE=1 SV=1	20	4	21.5	2.63981e+06	2.06749e+06	High	High
High	Master Protein	P16330	2',3'-cyclic-nucleotide 3'-phosphodiesterase OS=Mus musculus OX=10090 GN=Cnp PE=1 SV=3	6	4	47.1	661201	618799	High	High
High	Master Protein	Q9CR00	26S proteasome non-ATPase regulatory subunit 9 OS=Mus musculus OX=10090 GN=Psmd9 PE=1 SV=1	15	4	24.7	3.32701e+06	2.96274e+06	High	High
High	Master Protein	Q6PDY2	2-aminoethanethiol dioxygenase OS=Mus musculus OX=10090 GN=Ado PE=1 SV=2	21	4	28.4	1.54271e+06	1.29289e+06	High	High
High	Master Protein	P62852	40S ribosomal protein S25 OS=Mus musculus OX=10090 GN=Rps25 PE=1 SV=1	22	4	13.7	9.59047e+06	7.49e+06	High	High
High	Master Protein	O35405	5'-3' exonuclease PLD3 OS=Mus musculus OX=10090 GN=Pld3 PE=1 SV=1	4	4	54.4	3.15495e+06	2.92075e+06	High	High
High	Master Protein	P67984	60S ribosomal protein L22 OS=Mus musculus OX=10090 GN=Rpl22 PE=1 SV=2	19	4	14.8	1.26321e+07	11800200	High	High
High	Master Protein	P60840	Alpha-endosulfine OS=Mus musculus OX=10090 GN=Ensa PE=1 SV=1	16	4	13.3	71027.2	88979.8	High	High
High	Master Protein	Q6PAM1	Alpha-taxilin OS=Mus musculus OX=10090 GN=Txlna PE=1 SV=1	6	4	62.3	152866	187767	High	High
High	Master Protein	A0A3B2WAQ7	Ankyrin repeat and SAM domain containing 1 OS=Mus musculus OX=10090 GN=Anks1 PE=1 SV=1	4	4	122.7	1.18431e+06	578034	High	High
High	Master Protein	Q3TIV9	AP complex subunit sigma OS=Mus musculus OX=10090 GN=Ap1s2 PE=1 SV=1	18	4	18.6	3.97619e+06	3.15027e+06	High	High
High	Master Protein	G3XA09	Apoptotic protease-activating factor 1 OS=Mus musculus OX=10090 GN=Apaf1 PE=1 SV=1	3	4	139.8	1.28282e+06	1.06421e+06	High	High
High	Master Protein	Q80ZP8	Armet protein OS=Mus musculus OX=10090 GN=Manf PE=1 SV=1	32	4	19	2.46556e+06	1.50881e+06	High	High
High	Master Protein	A0A0R4J138	Arylsulfatase B OS=Mus musculus OX=10090 GN=Arsb PE=1 SV=1	3	4	59.7	890659	794280	High	High
High	Master Protein	E9PV44	ATPase inhibitory factor 1 OS=Mus musculus OX=10090 GN=Atpif1 PE=1 SV=1	28	4	8.8	3.50448e+06	3.5411e+06	High	High
High	Master Protein	P61222	ATP-binding cassette sub-family E member 1 OS=Mus musculus OX=10090 GN=Abce1 PE=1 SV=1	7	4	67.3	1.23983e+06	898286	High	High
High	Master Protein	Q99J83	Autophagy protein 5 OS=Mus musculus OX=10090 GN=Atg5 PE=1 SV=1	8	4	32.4	1.26121e+06	1.09046e+06	High	High
High	Master Protein	Q8C4Q6	Axin interactor, dorsalization-associated protein OS=Mus musculus OX=10090 GN=Aida PE=1 SV=1	11	4	34.9	1.08099e+06	856414	High	High
High	Master Protein	O88738	Baculoviral IAP repeat-containing protein 6 OS=Mus musculus OX=10090 GN=Birc6 PE=1 SV=2	1	4	531.8	279227	273255	High	High
High	Master Protein	G5E8U9	BCL2/adenovirus E1B 19 kDa protein-interacting protein 2 OS=Mus musculus OX=10090 GN=Bnip2 PE=1 SV=1	8	4	39.8	649642	595853	High	High
High	Master Protein	Q9D8S9	BolA-like protein 1 OS=Mus musculus OX=10090 GN=Bola1 PE=1 SV=1	18	4	14.4	1.0014e+06	1.03756e+06	High	High
High	Master Protein	Q9Z0H8	CAP-Gly domain-containing linker protein 2 OS=Mus musculus OX=10090 GN=Clip2 PE=1 SV=2	4	4	115.8	400423	375926	High	High
High	Master Protein	Q9DBC3	Cap-specific mRNA (nucleoside-2'-O-)-methyltransferase 1 OS=Mus musculus OX=10090 GN=Cmtr1 PE=1 SV=1	3	4	95.6	215708	217386	High	High
High	Master Protein	O08738	Caspase-6 OS=Mus musculus OX=10090 GN=Casp6 PE=1 SV=1	11	4	31.6	3.7017e+06	3.54999e+06	High	High
High	Master Protein	P27784	C-C motif chemokine 6 OS=Mus musculus OX=10090 GN=Ccl6 PE=1 SV=1	29	4	13	2.91903e+06	3.12368e+06	High	High
High	Master Protein	E9Q4G8	CD166 antigen OS=Mus musculus OX=10090 GN=Alcam PE=1 SV=1	10	4	61.9	364137	518013	Peak Found	High
High	Master Protein	Q9D7S9	Charged multivesicular body protein 5 OS=Mus musculus OX=10090 GN=Chmp5 PE=1 SV=1	29	4	24.6	1.09829e+06	1.37774e+06	High	High
High	Master Protein	O55229	Choline/ethanolamine kinase OS=Mus musculus OX=10090 GN=Chkb PE=1 SV=3	13	4	45.1	663820	930703	High	High
High	Master Protein	Q8BIQ5	Cleavage stimulation factor subunit 2 OS=Mus musculus OX=10090 GN=Cstf2 PE=1 SV=2	8	4	61.3	4.45639e+06	4.65172e+06	High	High
High	Master Protein	A2A7K5	c-Myc-binding protein OS=Mus musculus OX=10090 GN=Mycbp PE=1 SV=1	25	4	16.6	1.53777e+06	1.82505e+06	High	High
High	Master Protein	E9Q2S9	Coiled-coil domain-containing protein 43 OS=Mus musculus OX=10090 GN=Ccdc43 PE=1 SV=1	17	4	25	1.05703e+06	998483	High	High
High	Master Protein	Q63829	COMM domain-containing protein 3 OS=Mus musculus OX=10090 GN=Commd3 PE=1 SV=1	17	4	22	2.12413e+06	1.58013e+06	High	High
High	Master Protein	Q3V4B5	COMM domain-containing protein 6 OS=Mus musculus OX=10090 GN=Commd6 PE=1 SV=1	44	4	9.8	1.43235e+06	1.04021e+06	High	High
High	Master Protein	D3YZ61	Complement C1q tumor necrosis factor-related protein 3 OS=Mus musculus OX=10090 GN=C1qtnf3 PE=1 SV=1	8	4	35	1.83418e+06	1.8193e+06	High	High
High	Master Protein	P06909	Complement factor H OS=Mus musculus OX=10090 GN=Cfh PE=1 SV=2	3	4	139	1.05714e+06	920723	High	High
High	Master Protein	A2CF65	C-type lectin domain family 10 member A (Fragment) OS=Mus musculus OX=10090 GN=Clec10a PE=1 SV=1	25	4	24.5	2.49645e+06	2.79238e+06	High	High
High	Master Protein	Q9JKF4	C-type lectin domain family 6 member A OS=Mus musculus OX=10090 GN=Clec6a PE=1 SV=1	13	4	24.3	2.11799e+06	1.92753e+06	High	High
High	Master Protein	Q8CI33	CWF19-like protein 1 OS=Mus musculus OX=10090 GN=Cwf19l1 PE=1 SV=2	5	4	60.2	856737	831758	High	High
High	Master Protein	P17515	C-X-C motif chemokine 10 OS=Mus musculus OX=10090 GN=Cxcl10 PE=1 SV=1	20	4	10.8	3.67082e+06	4.27527e+06	High	High
High	Master Protein	P49615	Cyclin-dependent-like kinase 5 OS=Mus musculus OX=10090 GN=Cdk5 PE=1 SV=1	9	4	33.3	614213	483977	High	High
High	Master Protein	Q3U3M5	Cyclin-K OS=Mus musculus OX=10090 GN=Ccnk PE=1 SV=1	9	4	64.3	925492	809256	High	High
High	Master Protein	Q3TDX8	Cytochrome b5 reductase 4 OS=Mus musculus OX=10090 GN=Cyb5r4 PE=2 SV=3	6	4	59.7	1.13551e+06	700607	High	High
High	Master Protein	Q8BH99	Cytoplasmic protein NCK1 OS=Mus musculus OX=10090 GN=Nck1 PE=1 SV=1	15	4	35.5	983018	389882	High	High
High	Master Protein	Q8K3G9	DCC-interacting protein 13-beta OS=Mus musculus OX=10090 GN=Appl2 PE=1 SV=1	9	4	73.8	3.26949e+06	2.91166e+06	High	High
High	Master Protein	D3Z0M9	DEAD (Asp-Glu-Ala-Asp) box polypeptide 23 OS=Mus musculus OX=10090 GN=Ddx23 PE=1 SV=1	4	4	95.4	495914	493270	High	High
High	Master Protein	Q8VDK1	Deaminated glutathione amidase OS=Mus musculus OX=10090 GN=Nit1 PE=1 SV=2	11	4	35.7	2.56563e+06	2.30296e+06	High	High
High	Master Protein	D3Z512	Deoxyribonuclease II alpha OS=Mus musculus OX=10090 GN=Dnase2a PE=1 SV=1	11	4	36.5	2.3344e+06	2.43579e+06	High	High
High	Master Protein	Q9QYJ3	DnaJ homolog subfamily B member 1 OS=Mus musculus OX=10090 GN=Dnajb1 PE=1 SV=3	9	4	38.1	755705	498332	High	High
High	Master Protein	Q91WN1	DnaJ homolog subfamily C member 9 OS=Mus musculus OX=10090 GN=Dnajc9 PE=1 SV=2	18	4	30	2.2986e+06	1.74036e+06	High	High
High	Master Protein	Q9D0M5	Dynein light chain 2, cytoplasmic OS=Mus musculus OX=10090 GN=Dynll2 PE=1 SV=1	25	4	10.3	3.92194e+06	4.32527e+06	High	High
High	Master Protein	A0A338P7B7	Dynein light chain Tctex-type 1A OS=Mus musculus OX=10090 GN=Dynlt1a PE=1 SV=1	34	4	12.2	1.34662e+06	1.41126e+06	High	High
High	Master Protein	G3X9K8	EKC/KEOPS complex subunit Tprkb OS=Mus musculus OX=10090 GN=Tprkb PE=1 SV=1	21	4	17.7	578194	625907	High	High
High	Master Protein	Q8C0D5	Elongation factor-like GTPase 1 OS=Mus musculus OX=10090 GN=Efl1 PE=1 SV=1	3	4	125.7	1.38609e+06	691858	High	High
High	Master Protein	Q8VDI1	Epithelial-stromal interaction protein 1 OS=Mus musculus OX=10090 GN=Epsti1 PE=1 SV=2	7	4	36.1	165072	171796	High	High
High	Master Protein	A2AV19	Exosome complex component RRP4 (Fragment) OS=Mus musculus OX=10090 GN=Exosc2 PE=1 SV=1	17	4	27.3	1.24201e+06	1.10748e+06	High	High
High	Master Protein	F6TLV3	Fibronectin type-III domain-containing protein 3A (Fragment) OS=Mus musculus OX=10090 GN=Fndc3a PE=1 SV=1	5	4	127.2	679107	608821	High	High
High	Master Protein	A2AB60	Formin-like protein 1 OS=Mus musculus OX=10090 GN=Fmnl1 PE=1 SV=1	3	4	121.5	685366	677249	High	High
High	Master Protein	Q9DCD6	Gamma-aminobutyric acid receptor-associated protein OS=Mus musculus OX=10090 GN=Gabarap PE=1 SV=2	24	4	13.9	6.68203e+06	7.14479e+06	High	High
High	Master Protein	Q8R3R8	Gamma-aminobutyric acid receptor-associated protein-like 1 OS=Mus musculus OX=10090 GN=Gabarapl1 PE=1 SV=2	25	4	14	498827	435902	High	High
High	Master Protein	Q9CWZ7	Gamma-soluble NSF attachment protein OS=Mus musculus OX=10090 GN=Napg PE=1 SV=1	13	4	34.7	1.58601e+06	588590	High	High
High	Master Protein	Q8K0C9	GDP-mannose 4,6 dehydratase OS=Mus musculus OX=10090 GN=Gmds PE=1 SV=1	8	4	42	588184	522322	High	High
High	Master Protein	Q8BUV3	Gephyrin OS=Mus musculus OX=10090 GN=Gphn PE=1 SV=2	5	4	83.2	909003	642603	High	High
High	Master Protein	Q3ULJ0	Glycerol-3-phosphate dehydrogenase 1-like protein OS=Mus musculus OX=10090 GN=Gpd1l PE=1 SV=2	13	4	38.2	1935920	2.03701e+06	High	High
High	Master Protein	E9QAQ5	Glycogen synthase kinase-3 beta OS=Mus musculus OX=10090 GN=Gsk3b PE=1 SV=1	13	4	48	354671	652068	High	High
High	Master Protein	P08556	GTPase NRas OS=Mus musculus OX=10090 GN=Nras PE=1 SV=1	11	4	21.2	1.12455e+06	775664	High	High
High	Master Protein	O35969	Guanidinoacetate N-methyltransferase OS=Mus musculus OX=10090 GN=Gamt PE=1 SV=1	22	4	26.3	1.67845e+06	1.62764e+06	High	High
High	Master Protein	Q8BTS3	Guanylate-binding protein 9 OS=Mus musculus OX=10090 GN=Gbp9 PE=1 SV=1	3	4	71.3	410934	466235	High	High
High	Master Protein	Q5PRF0	HEAT repeat-containing protein 5A OS=Mus musculus OX=10090 GN=Heatr5a PE=1 SV=2	2	4	219.8	929986	727911	High	High
High	Master Protein	P10922	Histone H1.0 OS=Mus musculus OX=10090 GN=H1-0 PE=2 SV=4	11	4	20.8	1.84318e+06	1.38303e+06	High	High
High	Master Protein	G3X9H5	Huntingtin OS=Mus musculus OX=10090 GN=Htt PE=1 SV=1	2	4	344.6	448695	608486	High	High
High	Master Protein	Q61425	Hydroxyacyl-coenzyme A dehydrogenase, mitochondrial OS=Mus musculus OX=10090 GN=Hadh PE=1 SV=2	15	4	34.4	773210	675308	High	High
High	Master Protein	Q8JZK9	Hydroxymethylglutaryl-CoA synthase, cytoplasmic OS=Mus musculus OX=10090 GN=Hmgcs1 PE=1 SV=1	4	4	57.5	560407	566031	High	High
High	Master Protein	Q91UZ5	Inositol monophosphatase 2 OS=Mus musculus OX=10090 GN=Impa2 PE=1 SV=1	10	4	31.7	2.7232e+06	2.07581e+06	High	High
High	Master Protein	Q8R0F6	Integrin-linked kinase-associated serine/threonine phosphatase 2C OS=Mus musculus OX=10090 GN=Ilkap PE=1 SV=1	10	4	42.7	1.33279e+06	1.44565e+06	High	High
High	Master Protein	O35664	Interferon alpha/beta receptor 2 OS=Mus musculus OX=10090 GN=Ifnar2 PE=1 SV=2	4	4	56.5	6.17035e+06	6.49295e+06	High	High
High	Master Protein	Q8R5F7	Interferon-induced helicase C domain-containing protein 1 OS=Mus musculus OX=10090 GN=Ifih1 PE=1 SV=1	3	4	115.9	1.43635e+06	1.32962e+06	High	High
High	Master Protein	D6RCU1	Interleukin-1 receptor-associated kinase 3 OS=Mus musculus OX=10090 GN=Irak3 PE=1 SV=1	10	4	35	1.14474e+06	1.02388e+06	High	High
High	Master Protein	Q5DU25	IQ motif and SEC7 domain-containing protein 2 OS=Mus musculus OX=10090 GN=Iqsec2 PE=1 SV=3	1	4	161.7	1.05468e+06	1.50176e+06	High	High
High	Master Protein	Q8C0M9	Isoaspartyl peptidase/L-asparaginase OS=Mus musculus OX=10090 GN=Asrgl1 PE=1 SV=1	8	4	33.9	1.30661e+06	1.08202e+06	High	High
High	Master Protein	Q05CL8	La-related protein 7 OS=Mus musculus OX=10090 GN=Larp7 PE=1 SV=2	7	4	64.8	1.89314e+06	1.58515e+06	High	High
High	Master Protein	Q80U56	Late secretory pathway protein AVL9 homolog OS=Mus musculus OX=10090 GN=Avl9 PE=1 SV=2	3	4	72.1	480407	482793	High	High
High	Master Protein	Q8K1T1	Leucine-rich repeat-containing protein 25 OS=Mus musculus OX=10090 GN=Lrrc25 PE=1 SV=1	10	4	32.7	2.82626e+06	2.75595e+06	High	High
High	Master Protein	P17047	Lysosome-associated membrane glycoprotein 2 OS=Mus musculus OX=10090 GN=Lamp2 PE=1 SV=2	6	4	45.7	1.12647e+07	8.82806e+06	High	High
High	Master Protein	P30204	Macrophage scavenger receptor types I and II OS=Mus musculus OX=10090 GN=Msr1 PE=1 SV=3	10	4	50.1	1.91133e+06	1.73898e+06	High	High
High	Master Protein	P31996	Macrosialin OS=Mus musculus OX=10090 GN=Cd68 PE=1 SV=1	6	4	34.8	5.55591e+06	2.99702e+06	High	High
High	Master Protein	Q9CQ21	Malignant T-cell-amplified sequence 2 OS=Mus musculus OX=10090 GN=Mcts2 PE=1 SV=1	27	4	20.4	1.52524e+06	1.60276e+06	High	High
High	Master Protein	Q924M7	Mannose-6-phosphate isomerase OS=Mus musculus OX=10090 GN=Mpi PE=1 SV=1	7	4	46.5	764205	735484	High	High
High	Master Protein	Q3UMW7	MAP kinase-activated protein kinase 3 OS=Mus musculus OX=10090 GN=Mapkapk3 PE=1 SV=2	8	4	43.3	557575	622461	Peak Found	High
Medium	Master Protein	Q6P5G3	MBT domain-containing protein 1 OS=Mus musculus OX=10090 GN=Mbtd1 PE=1 SV=1	1	4	70.6	4.23804e+06	6.74426e+06	Peak Found	High
High	Master Protein	A0A286YD76	Microtubule-actin cross-linking factor 1 (Fragment) OS=Mus musculus OX=10090 GN=Macf1 PE=1 SV=1	2	4	147.1	58259.5	46333.8	High	Peak Found
High	Master Protein	Q8R3C0	Mini-chromosome maintenance complex-binding protein OS=Mus musculus OX=10090 GN=Mcmbp PE=1 SV=1	7	4	72.8	1.3617e+06	1.07602e+06	High	High
High	Master Protein	Q9D880	Mitochondrial import inner membrane translocase subunit TIM50 OS=Mus musculus OX=10090 GN=Timm50 PE=1 SV=1	12	4	39.8	1.66289e+06	1.68525e+06	High	High
High	Master Protein	Q9Z1B5	Mitotic spindle assembly checkpoint protein MAD2A OS=Mus musculus OX=10090 GN=Mad2l1 PE=1 SV=2	11	4	23.6	2.50546e+06	2.39612e+06	High	High
High	Master Protein	P19426	Negative elongation factor E OS=Mus musculus OX=10090 GN=Nelfe PE=1 SV=2	14	4	42.5	233779	244461	High	High
High	Master Protein	Q8CCH2	NHL repeat-containing protein 3 OS=Mus musculus OX=10090 GN=Nhlrc3 PE=1 SV=1	9	4	38.2	1.28353e+06	1.28392e+06	High	High
High	Master Protein	E9PWG6	Non-SMC condensin I complex, subunit G OS=Mus musculus OX=10090 GN=Ncapg PE=1 SV=1	3	4	112.8	341599	504359	High	High
High	Master Protein	Q9WTK5	Nuclear factor NF-kappa-B p100 subunit OS=Mus musculus OX=10090 GN=Nfkb2 PE=1 SV=1	5	4	96.8	820574	529139	High	High
High	Master Protein	Q8BTS4	Nuclear pore complex protein Nup54 OS=Mus musculus OX=10090 GN=Nup54 PE=1 SV=1	7	4	55.7	609443	680324	High	High
High	Master Protein	D3YUV1	Nuclear receptor-binding protein OS=Mus musculus OX=10090 GN=Nrbp1 PE=1 SV=1	5	4	60.8	1.44729e+06	1.30454e+06	High	High
High	Master Protein	P61971	Nuclear transport factor 2 OS=Mus musculus OX=10090 GN=Nutf2 PE=1 SV=1	24	4	14.5	3.74824e+06	3.91314e+06	High	High
High	Master Protein	P29758	Ornithine aminotransferase, mitochondrial OS=Mus musculus OX=10090 GN=Oat PE=1 SV=1	7	4	48.3	4.20088e+06	4.07888e+06	High	High
High	Master Protein	Q60520	Paired amphipathic helix protein Sin3a OS=Mus musculus OX=10090 GN=Sin3a PE=1 SV=3	2	4	145	963135	698169	High	High
High	Master Protein	P45878	Peptidyl-prolyl cis-trans isomerase FKBP2 OS=Mus musculus OX=10090 GN=Fkbp2 PE=1 SV=1	20	4	15.3	2.7577e+06	1.28297e+06	High	High
High	Master Protein	Q9R0H0	Peroxisomal acyl-coenzyme A oxidase 1 OS=Mus musculus OX=10090 GN=Acox1 PE=1 SV=5	7	4	74.6	817366	663444	High	High
High	Master Protein	Q9DC50	Peroxisomal carnitine O-octanoyltransferase OS=Mus musculus OX=10090 GN=Crot PE=1 SV=1	7	4	70.2	1.11245e+06	870606	High	High
High	Master Protein	Q9JHG7	Phosphatidylinositol 4,5-bisphosphate 3-kinase catalytic subunit gamma isoform OS=Mus musculus OX=10090 GN=Pik3cg PE=1 SV=2	3	4	126.3	594116	487290	High	High
High	Master Protein	Q9DBX5	Phospholipase A2 OS=Mus musculus OX=10090 GN=Pla2g4a PE=1 SV=1	8	4	84.2	1.2648e+06	1.49597e+06	High	High
High	Master Protein	Q8K4P0	pre-mRNA 3' end processing protein WDR33 OS=Mus musculus OX=10090 GN=Wdr33 PE=1 SV=1	3	4	145.2	441674	396672	High	High
High	Master Protein	A0A0R4J1Y3	Probable tRNA N6-adenosine threonylcarbamoyltransferase OS=Mus musculus OX=10090 GN=Osgep PE=1 SV=1	19	4	36.3	863194	878388	High	High
High	Master Protein	A0A0R4J0P5	Proline-serine-threonine phosphatase-interacting protein 1 OS=Mus musculus OX=10090 GN=Pstpip1 PE=1 SV=1	6	4	47.5	702312	777841	High	High
High	Master Protein	Q9DB60	Prostamide/prostaglandin F synthase OS=Mus musculus OX=10090 GN=Prxl2b PE=1 SV=1	13	4	21.7	1.74451e+06	1.34338e+06	High	High
High	Master Protein	Q9CQ89	Protein CutA OS=Mus musculus OX=10090 GN=Cuta PE=1 SV=3	16	4	18.9	1858001	2005369	High	High
High	Master Protein	Q99LT0	Protein dpy-30 homolog OS=Mus musculus OX=10090 GN=Dpy30 PE=1 SV=1	36	4	11.2	1.34375e+06	1.38229e+06	High	High
High	Master Protein	Q8BZ20	Protein mono-ADP-ribosyltransferase PARP12 OS=Mus musculus OX=10090 GN=Parp12 PE=1 SV=3	7	4	79.9	89257.8	80220.3	High	High
High	Master Protein	A0A494B933	Protein phosphatase 1 regulatory subunit 14B (Fragment) OS=Mus musculus OX=10090 GN=Ppp1r14b PE=1 SV=1	40	4	10.6	2.88941e+06	2.90546e+06	High	High
High	Master Protein	Q8CGA0	Protein phosphatase 1F OS=Mus musculus OX=10090 GN=Ppm1f PE=1 SV=1	10	4	49.6	1.20611e+06	971180	High	High
High	Master Protein	Q3UYC0	Protein phosphatase 1H OS=Mus musculus OX=10090 GN=Ppm1h PE=1 SV=1	10	4	56.3	456750	319094	High	High
High	Master Protein	A4QPD3	Proto-oncogene c-Rel OS=Mus musculus OX=10090 GN=Rel PE=1 SV=1	5	4	65.1	996126	401283	High	Peak Found
High	Master Protein	A0A1D5RLX7	PSME3-interacting protein (Fragment) OS=Mus musculus OX=10090 GN=Fam192a PE=1 SV=1	17	4	17.4	422597	411327	High	High
High	Master Protein	Q3TCN2	Putative phospholipase B-like 2 OS=Mus musculus OX=10090 GN=Plbd2 PE=1 SV=2	9	4	66.2	1.32966e+06	1.00626e+06	High	High
High	Master Protein	A0A1B0GRT6	Receptor-type tyrosine-protein phosphatase OS=Mus musculus OX=10090 GN=Ptpre PE=1 SV=1	6	4	82.6	710691	679088	High	Peak Found
High	Master Protein	Q9ES97	Reticulon-3 OS=Mus musculus OX=10090 GN=Rtn3 PE=1 SV=2	6	4	103.8	7.59742e+06	6.39932e+06	High	High
High	Master Protein	A0A494BBB6	Ribonuclease H2 subunit C (Fragment) OS=Mus musculus OX=10090 GN=Rnaseh2c PE=1 SV=1	31	4	17.9	1.78834e+06	1.83437e+06	High	High
High	Master Protein	O88796	Ribonuclease P protein subunit p30 OS=Mus musculus OX=10090 GN=Rpp30 PE=1 SV=1	15	4	29.5	1.30508e+06	1.21809e+06	High	High
High	Master Protein	Q8BVY0	Ribosomal L1 domain-containing protein 1 OS=Mus musculus OX=10090 GN=Rsl1d1 PE=1 SV=1	6	4	50.4	428688	324459	High	High
High	Master Protein	A0A1L1SSF8	RIKEN cDNA 4931406C07 gene OS=Mus musculus OX=10090 GN=4931406C07Rik PE=1 SV=1	15	4	31.3	1.50301e+06	1.01211e+06	High	High
High	Master Protein	Q7TSG2	RNA polymerase II subunit A C-terminal domain phosphatase OS=Mus musculus OX=10090 GN=Ctdp1 PE=1 SV=1	7	4	104.5	369045	300960	High	Peak Found
High	Master Protein	Q8C2Q3	RNA-binding protein 14 OS=Mus musculus OX=10090 GN=Rbm14 PE=1 SV=1	7	4	69.4	759759	582832	High	High
High	Master Protein	P59808	SAM and SH3 domain-containing protein 1 OS=Mus musculus OX=10090 GN=Sash1 PE=1 SV=1	3	4	135.5	350576	170698	High	High
High	Master Protein	G3UZ26	Serine hydroxymethyltransferase (Fragment) OS=Mus musculus OX=10090 GN=Shmt1 PE=1 SV=1	7	4	48.4	474815	347882	High	High
High	Master Protein	Q3TFP0	Serine/arginine-rich-splicing factor 10 OS=Mus musculus OX=10090 GN=Srsf10 PE=1 SV=1	16	4	22.1	1.50192e+06	1.37899e+06	High	High
High	Master Protein	Q61136	Serine/threonine-protein kinase PRP4 homolog OS=Mus musculus OX=10090 GN=Prpf4b PE=1 SV=3	3	4	116.9	416061	369513	High	High
[truncated: 1,125 more rows]

## Sheet: PeptideGroups
Confidence	Annotated Sequence	Modifications	# Proteins	# PSMs	Master Protein Accessions	Positions in Master Proteins	Modifications in Master Proteins	Master Protein Descriptions	# Missed Cleavages	Abundance_779257	Abundance_779258	Found in Sample_779257	Found in Sample_779258
High	[R].VREDDEDSDDDGSDEEIDESLAAQFLNSGNVR.[H]	1xPhospho [S13(95.1)]	3	2	A0A087WNZ7	A0A087WNZ7 [1310-1341]	A0A087WNZ7 1xPhospho [S1322(95.1)]	E3 ubiquitin-protein ligase TRIP12 OS=Mus musculus OX=10090 GN=Trip12 PE=1 SV=1	1	152422	102196	High	High
High	[R].VREDDEDSDDDGSDEEIDESLAAQFLNSGNVR.[H]	2xPhospho [S8(92.4); S13(92.4)]	3	1	A0A087WNZ7	A0A087WNZ7 [1310-1341]	A0A087WNZ7 2xPhospho [S1317(92.4); S1322(92.4)]	E3 ubiquitin-protein ligase TRIP12 OS=Mus musculus OX=10090 GN=Trip12 PE=1 SV=1	1	86488.7	54905.2	Peak Found	High
High	[R].SESPPAELPSLR.[R]	1xPhospho [S3(97.6)]	5	4	A0A087WNZ7	A0A087WNZ7 [310-321]	A0A087WNZ7 1xPhospho [S312(97.6)]	E3 ubiquitin-protein ligase TRIP12 OS=Mus musculus OX=10090 GN=Trip12 PE=1 SV=1	0	256876	185826	High	High
High	[R].DASDVEDEKPPLPPR.[S]	1xPhospho [S3(100)]	2	6	A0A087WPT7	A0A087WPT7 [130-144]	A0A087WPT7 1xPhospho [S132(100)]	Phosphatidylinositol 3,4,5-trisphosphate 5-phosphatase 2 (Fragment) OS=Mus musculus OX=10090 GN=Inppl1 PE=1 SV=1	0	97054	47489.5	High	High
High	[R].AASDGQYENQSPEATSPR.[S]	1xPhospho [S3(100)]	6	1	A0A087WQ94	A0A087WQ94 [883-900]	A0A087WQ94 1xPhospho [S885(100)]	Tensin 1 (Fragment) OS=Mus musculus OX=10090 GN=Tns1 PE=1 SV=1	0	19160.5	8742.08	Peak Found	High
High	[K].NNIPEPVVIGIVWSSVMSTVEWNK.[K]		3	1	A0A087WQS2	A0A087WQS2 [317-340]		Basic leucine zipper and W2 domain-containing protein 1 OS=Mus musculus OX=10090 GN=Bzw1 PE=1 SV=1	0	143202	19161.7	High	Peak Found
High	[R].YAETLFDILVAGGMLAPGGTLADDMMR.[T]		2	1	A0A087WQS2	A0A087WQS2 [98-124]		Basic leucine zipper and W2 domain-containing protein 1 OS=Mus musculus OX=10090 GN=Bzw1 PE=1 SV=1	0	85021.9	8795.53	High	Peak Found
High	[R].TSPTPGDFPK.[G]	1xPhospho [S2(86.3)]	2	1	A0A087WRL5	A0A087WRL5 [154-163]	A0A087WRL5 1xPhospho [S155(86.3)]	TBC1 domain family member 2B OS=Mus musculus OX=10090 GN=Tbc1d2b PE=1 SV=1	0	62281.7	46648.3	High	Peak Found
High	[R].SIQADGLVWGSSK.[L]	1xPhospho [S11(89.1)]	2	1	A0A087WS46	A0A087WS46 [123-135]	A0A087WS46 1xPhospho [S133(89.1)]	Eukaryotic translation elongation factor 1 beta 2 OS=Mus musculus OX=10090 GN=Eef1b2 PE=1 SV=1	0	48247.6	32638.7	High	Peak Found
High	[K].YGPSSVEDTTGSGAADAKDDDDIDLFGSDDEEESEEAK.[K]	1xPhospho [S28(100)]	2	13	A0A087WS46	A0A087WS46 [38-75]	A0A087WS46 1xPhospho [S65(100)]	Eukaryotic translation elongation factor 1 beta 2 OS=Mus musculus OX=10090 GN=Eef1b2 PE=1 SV=1	1	2.24703e+07	1.36334e+07	High	High
High	[K].YGPSSVEDTTGSGAADAKDDDDIDLFGSDDEEESEEAKK.[L]	1xPhospho [S28(100)]	2	5	A0A087WS46	A0A087WS46 [38-76]	A0A087WS46 1xPhospho [S65(100)]	Eukaryotic translation elongation factor 1 beta 2 OS=Mus musculus OX=10090 GN=Eef1b2 PE=1 SV=1	2	6.26333e+06	6.08865e+06	High	High
High	[K].DDDDIDLFGSDDEEESEEAK.[K]	1xPhospho [S10(100)]	2	2	A0A087WS46	A0A087WS46 [56-75]	A0A087WS46 1xPhospho [S65(100)]	Eukaryotic translation elongation factor 1 beta 2 OS=Mus musculus OX=10090 GN=Eef1b2 PE=1 SV=1	0	707539	783223	High	High
High	[K].DDDDIDLFGSDDEEESEEAKK.[L]	1xPhospho [S10(84)]	2	1	A0A087WS46	A0A087WS46 [56-76]	A0A087WS46 1xPhospho [S65(84)]	Eukaryotic translation elongation factor 1 beta 2 OS=Mus musculus OX=10090 GN=Eef1b2 PE=1 SV=1	1	14205.9	30104.6	High	Peak Found
High	[K].AASVELPQR.[R]	1xPhospho [S3(100)]	3	1	A0A087WSE3	A0A087WSE3 [1788-1796]	A0A087WSE3 1xPhospho [S1790(100)]	Striated muscle-specific serine/threonine-protein kinase (Fragment) OS=Mus musculus OX=10090 GN=Speg PE=1 SV=1	0	72687.9	59463.4	Peak Found	High
High	[K].TPDLSNQNSSDQANEEWETASESSDFNER.[R]	1xPhospho [S10(76.5)]	6	2	A0A0A0MQ79	A0A0A0MQ79 [1450-1478]	A0A0A0MQ79 1xPhospho [S1459(76.5)]	Protein PRRC2C OS=Mus musculus OX=10090 GN=Prrc2c PE=1 SV=1	0	96002.7	56353.4	High	High
High	[K].SPVVSGDTSPR.[H]		4	1	A0A0A0MQC7	A0A0A0MQC7 [688-698]		Microtubule-associated protein OS=Mus musculus OX=10090 GN=Mapt PE=1 SV=1	0	10771.5	2859.27	High	Peak Found
High	[R].HLSNVSSTGSIDMVDSPQLATLADEVSASLAK.[Q]	1xOxidation [M13]	4	3	A0A0A0MQC7	A0A0A0MQC7 [699-730]		Microtubule-associated protein OS=Mus musculus OX=10090 GN=Mapt PE=1 SV=1	0	8481611	250981	High	High
High	[R].HLSNVSSTGSIDMVDSPQLATLADEVSASLAK.[Q]		4	2	A0A0A0MQC7	A0A0A0MQC7 [699-730]		Microtubule-associated protein OS=Mus musculus OX=10090 GN=Mapt PE=1 SV=1	0	2.44775e+06	204114	High	High
High	[R].SSSPVLVEEEPER.[S]	1xPhospho [S3(98.7)]	3	2	A0A0A0MQJ4	A0A0A0MQJ4 [89-101]	A0A0A0MQJ4 1xPhospho [S91(98.7)]	Phosphatase and actin regulator 4 (Fragment) OS=Mus musculus OX=10090 GN=Phactr4 PE=1 SV=1	0	235829	247514	High	High
High	[R].AASSPNLSNGETESVK.[T]	1xPhospho [S/T]	9	1	A0A0A6YW53	A0A0A6YW53 [847-862]		Mitogen-activated protein kinase kinase kinase kinase 4 OS=Mus musculus OX=10090 GN=Map4k4 PE=1 SV=1	0			Not Found	High
High	[K].VAIVEELVVGYETSLK.[S]		3	1	A0A0A6YW80	A0A0A6YW80 [289-304]		N-alpha-acetyltransferase 15, NatA auxiliary subunit OS=Mus musculus OX=10090 GN=Naa15 PE=1 SV=1	0			Not Found	High
High	[R].RVSVCAETFNPDEEEEDNDPR.[V]	1xCarbamidomethyl [C5]; 1xPhospho [S3(100)]	3	1	A0A0A6YX73	A0A0A6YX73 [95-115]	A0A0A6YX73 1xPhospho [S97(100)]	cAMP-dependent protein kinase type II-alpha regulatory subunit OS=Mus musculus OX=10090 GN=Prkar2a PE=1 SV=1	1	112361	53663.8	High	Peak Found
High	[-].MASVLEELQK.[D]	1xMet-loss+Acetyl [N-Term]	2	1	A0A0A6YY29	A0A0A6YY29 [1-10]	A0A0A6YY29 1xMet-loss+Acetyl [N-Term]	Calcyclin-binding protein (Fragment) OS=Mus musculus OX=10090 GN=Cacybp PE=1 SV=1	0			Not Found	High
High	[K].ALALGASTVMMGSLLAATTEAPGEYFFSDGIR.[L]		2	1	A0A0A6YY72	A0A0A6YY72 [194-225]		Inosine-5'-monophosphate dehydrogenase 2 (Fragment) OS=Mus musculus OX=10090 GN=Impdh2 PE=1 SV=1	0	221835		High	Not Found
High	[R].GSPPAAGGSPSSLK.[F]	1xPhospho [S2(100)]	2	2	A0A0G2JDH4	A0A0G2JDH4 [70-83]	A0A0G2JDH4 1xPhospho [S71(100)]	Krueppel-like factor 3 (Fragment) OS=Mus musculus OX=10090 GN=Klf3 PE=1 SV=1	0	44455.7	35962.9	High	High
High	[K].STSAPQMSPGSSDNQSSSPQPAQQK.[L]	1xOxidation [M7]; 1xPhospho [S/T]	3	2	A0A0G2JDV6	A0A0G2JDV6 [460-484]		Ubiquitin-associated protein 2-like OS=Mus musculus OX=10090 GN=Ubap2l PE=1 SV=1	0	229134	178825	High	High
High	[K].STSAPQMSPGSSDNQSSSPQPAQQK.[L]	1xPhospho [S3(90)]	3	2	A0A0G2JDV6	A0A0G2JDV6 [460-484]	A0A0G2JDV6 1xPhospho [S462(90)]	Ubiquitin-associated protein 2-like OS=Mus musculus OX=10090 GN=Ubap2l PE=1 SV=1	0	514759	355066	High	High
High	[K].ILMEMGEFFQVQDDYLDLFGDPSVTGK.[V]		2	1	A0A0G2JE82	A0A0G2JE82 [153-179]		Farnesyl pyrophosphate synthase (Fragment) OS=Mus musculus OX=10090 GN=Fdps PE=1 SV=1	0	641759	191496	Peak Found	High
High	[K].ALYEALDLQSAFFK.[Y]		3	1	A0A0G2JE82	A0A0G2JE82 [225-238]		Farnesyl pyrophosphate synthase (Fragment) OS=Mus musculus OX=10090 GN=Fdps PE=1 SV=1	0	219329		High	Not Found
High	[R].EQPYYLNLLELFLQSSYQTEIGQTLDLMTAPQGHVDLGR.[Y]		3	2	A0A0G2JE82	A0A0G2JE82 [55-93]		Farnesyl pyrophosphate synthase (Fragment) OS=Mus musculus OX=10090 GN=Fdps PE=1 SV=1	0	684842	76674.1	High	High
High	[R].EQPYYLNLLELFLQSSYQTEIGQTLDLMTAPQGHVDLGR.[Y]	1xOxidation [M28]	3	1	A0A0G2JE82	A0A0G2JE82 [55-93]		Farnesyl pyrophosphate synthase (Fragment) OS=Mus musculus OX=10090 GN=Fdps PE=1 SV=1	0	188207	52334.6	High	Peak Found
High	[R].RGSGDTSSLIDPDTSLSELR.[DE]	1xPhospho [S3(99.4)]	11	1	A0A0G2JEF6	A0A0G2JEF6 [106-125]	A0A0G2JEF6 1xPhospho [S108(99.4)]	Leucine-rich repeat flightless-interacting protein 2 (Fragment) OS=Mus musculus OX=10090 GN=Lrrfip2 PE=1 SV=2	1	106650	70814.1	High	Peak Found
High	[R].TSEAGPDKETASTLVQEASPELSPEER.[R]	1xPhospho [S19(99)]	2	1	A0A0G2JEY4	A0A0G2JEY4 [30-56]	A0A0G2JEY4 1xPhospho [S48(99)]	RIKEN cDNA 3110082I17 gene OS=Mus musculus OX=10090 GN=3110082I17Rik PE=1 SV=1	1	292364	112073	Peak Found	High
High	[K].IFGVTTLDIVR.[A]		3	2	A0A0G2JF23	A0A0G2JF23 [143-153]		Malate dehydrogenase (Fragment) OS=Mus musculus OX=10090 GN=Mdh2 PE=1 SV=1	0			High	High
High	[R].ANTFVAELK.[G]		2	1	A0A0G2JF23	A0A0G2JF23 [154-162]		Malate dehydrogenase (Fragment) OS=Mus musculus OX=10090 GN=Mdh2 PE=1 SV=1	0	11926.1	9037.08	Peak Found	High
High	[K].IQIAPDSGGLPER.[S]	1xPhospho [S7(100)]	7	1	A0A0G2JFY5	A0A0G2JFY5 [130-142]	A0A0G2JFY5 1xPhospho [S136(100)]	Far upstream element-binding protein 1 OS=Mus musculus OX=10090 GN=Fubp1 PE=1 SV=1	0	20966.9	16370.8	High	Peak Found
High	[R].ALELLNYLAALNDDGDLTELGSMMAEFPLDPQLAK.[M]		3	1	A0A0G2JG10	A0A0G2JG10 [539-573]		Pre-mRNA-splicing factor ATP-dependent RNA helicase DHX15 OS=Mus musculus OX=10090 GN=Dhx15 PE=1 SV=1	0	68141.2		High	Not Found
High	[R].QSPGPALAR.[L]	1xPhospho [S2(100)]	2	2	A0A0G2JG71	A0A0G2JG71 [86-94]	A0A0G2JG71 1xPhospho [S87(100)]	Forkhead box protein K1 OS=Mus musculus OX=10090 GN=Foxk1 PE=1 SV=1	0	20607.6	16173.5	High	High
High	[-].MARPLEEALDVIVSTFHK.[Y]	1xMet-loss+Acetyl [N-Term]	2	2	A0A0G2JGD2	A0A0G2JGD2 [1-18]	A0A0G2JGD2 1xMet-loss+Acetyl [N-Term]	Protein S100-A4 (Fragment) OS=Mus musculus OX=10090 GN=S100a4 PE=1 SV=1	0	603201	100212	High	High
High	[R].TDEAAFQK.[V]		2	2	A0A0G2JGD2	A0A0G2JGD2 [50-57]		Protein S100-A4 (Fragment) OS=Mus musculus OX=10090 GN=S100a4 PE=1 SV=1	0	37147.4	58854.5	High	High
High	[K].VMSNLDSNR.[D]	1xOxidation [M2]	2	1	A0A0G2JGD2	A0A0G2JGD2 [58-66]		Protein S100-A4 (Fragment) OS=Mus musculus OX=10090 GN=S100a4 PE=1 SV=1	0	20387.7	22876.9	Peak Found	High
High	[K].SSQFEGTFLGSESDEDSVR.[T]	1xPhospho [S13(99.7)]	2	2	A0A0G2JH06	A0A0G2JH06 [29-47]	A0A0G2JH06 1xPhospho [S41(99.7)]	Histone-lysine N-methyltransferase SETD2 (Fragment) OS=Mus musculus OX=10090 GN=Setd2 PE=1 SV=1	0	43103	34306.2	High	High
High	[K].TGSPTPSNQLNDSPTFK.[K]	2xPhospho [S3(93.3); S13(99.1)]	2	2	A0A0G2JH06	A0A0G2JH06 [329-345]	A0A0G2JH06 2xPhospho [S331(93.3); S341(99.1)]	Histone-lysine N-methyltransferase SETD2 (Fragment) OS=Mus musculus OX=10090 GN=Setd2 PE=1 SV=1	0	18129.8	11896.2	High	High
High	[R].WALSTEDANASDPSAEGTASPESDAQPLIR.[T]	1xPhospho [S20(99.7)]	5	1	A0A0J9YTU3	A0A0J9YTU3 [197-226]	A0A0J9YTU3 1xPhospho [S216(99.7)]	Cytospin-B OS=Mus musculus OX=10090 GN=Specc1 PE=1 SV=1	0	135916	86705.6	High	Peak Found
High	[K].SSKGSPTGSSPNNASELSLASLTEK.[I]	1xPhospho [S5(93.9)]	5	1	A0A0J9YTU3	A0A0J9YTU3 [351-375]	A0A0J9YTU3 1xPhospho [S355(93.9)]	Cytospin-B OS=Mus musculus OX=10090 GN=Specc1 PE=1 SV=1	1	141901	66487.9	High	Peak Found
High	[K].GSPTGSSPNNASELSLASLTEK.[I]	1xPhospho [T/S]	5	2	A0A0J9YTU3	A0A0J9YTU3 [354-375]		Cytospin-B OS=Mus musculus OX=10090 GN=Specc1 PE=1 SV=1	0	142611	94778.8	High	Peak Found
High	[K].AVGWGATIMVDAADLVVQGK.[G]		2	1	A0A0J9YUA3	A0A0J9YUA3 [459-478]		Huntingtin-interacting protein 1 (Fragment) OS=Mus musculus OX=10090 GN=Hip1 PE=1 SV=1	0			High	Not Found
High	[R].TIIGGAQIIDLMMLVIDVTK.[G]		3	1	A0A0N4SUV6	A0A0N4SUV6 [88-107]		Selenocysteine-specific elongation factor OS=Mus musculus OX=10090 GN=Eefsec PE=1 SV=1	0	9080.48		High	Not Found
High	[R].VFSSSQGVEQVVLGLYIVR.[G]		2	1	A0A0N4SUZ3	A0A0N4SUZ3 [49-67]		U6 snRNA-associated Sm-like protein LSm8 OS=Mus musculus OX=10090 GN=Lsm8 PE=1 SV=1	0	116084	37121.1	High	Peak Found
High	[R].GDNVAVIGEIDEETDSALDLGNIR.[A]		2	1	A0A0N4SUZ3	A0A0N4SUZ3 [68-91]		U6 snRNA-associated Sm-like protein LSm8 OS=Mus musculus OX=10090 GN=Lsm8 PE=1 SV=1	0	103581		High	Not Found
High	[K].MVVDAVMMLDELLQLK.[M]		2	2	A0A0N4SV00	A0A0N4SV00 [136-151]		T-complex protein 1 subunit eta OS=Mus musculus OX=10090 GN=Cct7 PE=1 SV=1	0	242612	18898.5	High	High
High	[K].MVVDAVMMLDELLQLK.[M]	1xOxidation [M1]	2	1	A0A0N4SV00	A0A0N4SV00 [136-151]		T-complex protein 1 subunit eta OS=Mus musculus OX=10090 GN=Cct7 PE=1 SV=1	0	56826.4		High	Not Found
High	[K].VQGGALEESQLVAGVAFK.[K]		2	2	A0A0N4SV00	A0A0N4SV00 [158-175]		T-complex protein 1 subunit eta OS=Mus musculus OX=10090 GN=Cct7 PE=1 SV=1	0	58627.1	28332.1	High	High
High	[R].VHTVEDYQAIVDAEWNILYDK.[L]		2	1	A0A0N4SV00	A0A0N4SV00 [215-235]		T-complex protein 1 subunit eta OS=Mus musculus OX=10090 GN=Cct7 PE=1 SV=1	0	116117	20492.7	High	Peak Found
High	[R].FDQLFDDESDPFEVLK.[A]	1xPhospho [S9(100)]	6	2	A0A0N4SV32	A0A0N4SV32 [17-32]	A0A0N4SV32 1xPhospho [S25(100)]	Plasminogen activator inhibitor 1 RNA-binding protein OS=Mus musculus OX=10090 GN=Serbp1 PE=1 SV=1	0	70903.2	43100.3	High	High
High	[K].SKSEEAHAEDSVMDHHFR.[K]	1xPhospho [S3(90.5)]	3	5	A0A0N4SV32	A0A0N4SV32 [282-299]	A0A0N4SV32 1xPhospho [S284(90.5)]	Plasminogen activator inhibitor 1 RNA-binding protein OS=Mus musculus OX=10090 GN=Serbp1 PE=1 SV=1	1	36912.4	25161.2	High	High
High	[K].EAGGGGVGGPGAK.[S]		6	1	A0A0N4SV32	A0A0N4SV32 [40-52]		Plasminogen activator inhibitor 1 RNA-binding protein OS=Mus musculus OX=10090 GN=Serbp1 PE=1 SV=1	0	5505.27	10776.2	Peak Found	High
High	[K].SAAQAAAQTNSNAAGK.[Q]		6	1	A0A0N4SV32	A0A0N4SV32 [53-68]		Plasminogen activator inhibitor 1 RNA-binding protein OS=Mus musculus OX=10090 GN=Serbp1 PE=1 SV=1	0	9988.76	9572.01	High	Peak Found
High	[R].MAGQEIPEEGREVEEFSEEEDADDSDDSEAEK.[Q]	1xPhospho [S]	2	1	A0A0N4SV69	A0A0N4SV69 [46-77]		WW domain-binding protein 11 (Fragment) OS=Mus musculus OX=10090 GN=Wbp11 PE=1 SV=1	1	47579.2	43546.3	Peak Found	High
High	[K].AGNSDSEEDDANERVDLILEPK.[D]	1xPhospho [S4(100)]	3	2	A0A0N4SV74	A0A0N4SV74 [154-175]	A0A0N4SV74 1xPhospho [S157(100)]	WASH complex subunit 2 (Fragment) OS=Mus musculus OX=10090 GN=Washc2 PE=1 SV=1	1	220810	153728	High	High
High	[K].GLFSDEEDSEDLFSSQSSSKPK.[S]	1xPhospho [S4(99.8)]	3	2	A0A0N4SV74	A0A0N4SV74 [530-551]	A0A0N4SV74 1xPhospho [S533(99.8)]	WASH complex subunit 2 (Fragment) OS=Mus musculus OX=10090 GN=Washc2 PE=1 SV=1	0	139090	99417.5	High	High
High	[R].VSPEVGSADVASIAQK.[E]	1xPhospho [S2(99.7)]	3	1	A0A0N4SV74	A0A0N4SV74 [746-761]	A0A0N4SV74 1xPhospho [S747(99.7)]	WASH complex subunit 2 (Fragment) OS=Mus musculus OX=10090 GN=Washc2 PE=1 SV=1	0	236894	150542	Peak Found	High
High	[-].MSSETGPVAVDPTLR.[RH]	1xMet-loss+Acetyl [N-Term]; 1xPhospho [S2(82.7)]	4	1	A0A0N4SVL6	A0A0N4SVL6 [1-15]	A0A0N4SVL6 1xMet-loss+Acetyl [N-Term]; 1xPhospho [S2(82.7)]	C->U-editing enzyme APOBEC-1 (Fragment) OS=Mus musculus OX=10090 GN=Apobec1 PE=1 SV=1	0			Not Found	High
High	[K].TASTNSIAQAR.[R]	1xPhospho [S6(100)]	3	2	A0A0N4SW28	A0A0N4SW28 [5-15]	A0A0N4SW28 1xPhospho [S10(100)]	Guanine nucleotide-binding protein subunit gamma OS=Mus musculus OX=10090 GN=Gng12 PE=1 SV=1	0	27282.5	19069.2	High	High
High	[R].TYSDEASQLR.[A]	1xPhospho [S3(97.9)]	2	1	A0A0N4SW73	A0A0N4SW73 [305-314]	A0A0N4SW73 1xPhospho [S307(97.9)]	Rab11 family-interacting protein 5 OS=Mus musculus OX=10090 GN=Rab11fip5 PE=1 SV=1	0	74217	62503.3	Peak Found	High
High	[R].MLPHAPGVQMQAIPEDAVHEDSGDEDGEDPDKR.[I]	1xPhospho [S22(100)]	2	5	A0A0R4J008	A0A0R4J008 [373-405]	A0A0R4J008 1xPhospho [S394(100)]	Histone deacetylase 2 OS=Mus musculus OX=10090 GN=Hdac2 PE=1 SV=1	1	236778	82075.7	High	High
High	[R].MLPHAPGVQMQAIPEDAVHEDSGDEDGEDPDKR.[I]	1xOxidation [M]; 1xPhospho [S22(100)]	2	5	A0A0R4J008	A0A0R4J008 [373-405]	A0A0R4J008 1xPhospho [S394(100)]	Histone deacetylase 2 OS=Mus musculus OX=10090 GN=Hdac2 PE=1 SV=1	1	197758	78259.4	High	High
High	[R].SGSTSPLGFGR.[A]	1xPhospho [S/T]	2	1	A0A0R4J0B3	A0A0R4J0B3 [465-475]		Serine/threonine-protein kinase OS=Mus musculus OX=10090 GN=Ulk1 PE=1 SV=1	0	40554.3	25549.4	Peak Found	High
High	[R].GTNQLDGMDLLVLLDLIGAANPTFPNFFPK.[T]		3	1	A0A0R4J0G6	A0A0R4J0G6 [235-264]		Glutaminyl-peptide cyclotransferase OS=Mus musculus OX=10090 GN=Qpct PE=1 SV=1	0	26360.3		High	Not Found
High	[R].NTIALDFHLSQSALYWTDVVEDK.[I]		2	1	A0A0R4J0I9	A0A0R4J0I9 [1299-1321]		Prolow-density lipoprotein receptor-related protein 1 OS=Mus musculus OX=10090 GN=Lrp1 PE=1 SV=1	0	212555	216564	Peak Found	High
High	[R].DGILFWTDWDASLPR.[I]		2	1	A0A0R4J0I9	A0A0R4J0I9 [1399-1413]		Prolow-density lipoprotein receptor-related protein 1 OS=Mus musculus OX=10090 GN=Lrp1 PE=1 SV=1	0	125258	48794.1	High	Peak Found
High	[R].GWDTLYWTSYTTSTITR.[H]		2	1	A0A0R4J0I9	A0A0R4J0I9 [2294-2310]		Prolow-density lipoprotein receptor-related protein 1 OS=Mus musculus OX=10090 GN=Lrp1 PE=1 SV=1	0			High	Not Found
High	[R].ALDFHAETGFIYFADTTSYLIGR.[Q]		3	2	A0A0R4J0I9	A0A0R4J0I9 [564-586]		Prolow-density lipoprotein receptor-related protein 1 OS=Mus musculus OX=10090 GN=Lrp1 PE=1 SV=1	0	417034	320511	High	High
High	[-].MSLSGASERSVPATK.[I]	1xMet-loss [N-Term]	3	1	A0A0R4J0J1	A0A0R4J0J1 [1-15]	A0A0R4J0J1 1xMet-loss [N-Term]	Copine-9 OS=Mus musculus OX=10090 GN=Cpne9 PE=1 SV=1	1	20057.4		High	Not Found
High	[K].YSPTSPTYSPTSPK.[YG]	1xPhospho [S/T/Y]	2	1	A0A0R4J0V5	A0A0R4J0V5 [1871-1884]; [1885-1898]		DNA-directed RNA polymerase subunit OS=Mus musculus OX=10090 GN=Polr2a PE=1 SV=1	0	9213.09	12995	Peak Found	High
High	[K].FALVEVIAMIK.[G]		3	1	A0A0R4J119	A0A0R4J119 [449-459]		Cytoplasmic FMR1-interacting protein OS=Mus musculus OX=10090 GN=Cyfip1 PE=1 SV=1	0	70606.9	19643.7	Peak Found	High
High	[R].FESEDLTSVVELDGLLEINR.[M]		3	2	A0A0R4J119	A0A0R4J119 [785-804]		Cytoplasmic FMR1-interacting protein OS=Mus musculus OX=10090 GN=Cyfip1 PE=1 SV=1	0	141920	81352.8	High	High
High	[R].LLGYQGIAVVMEELLK.[VI]		5	1	A0A0R4J119	A0A0R4J119 [918-933]		Cytoplasmic FMR1-interacting protein OS=Mus musculus OX=10090 GN=Cyfip1 PE=1 SV=1	0	34109.5		High	Not Found
High	[-].MATNFLAHEK.[I]	1xMet-loss+Acetyl [N-Term]	9	1	A0A0R4J1L2	A0A0R4J1L2 [1-10]	A0A0R4J1L2 1xMet-loss+Acetyl [N-Term]	Elongation factor 1-delta OS=Mus musculus OX=10090 GN=Eef1d PE=1 SV=1	0		18166.8	Not Found	High
High	[K].GATPAEDDEDKDIDLFGSDEEEEDKEAAR.[L]	1xPhospho [S18(100)]	10	9	A0A0R4J1L2	A0A0R4J1L2 [121-149]	A0A0R4J1L2 1xPhospho [S138(100)]	Elongation factor 1-delta OS=Mus musculus OX=10090 GN=Eef1d PE=1 SV=1	2	1.21589e+07	7.03948e+06	High	High
High	[K].GATPAEDDEDKDIDLFGSDEEEEDKEAAR.[L]	2xPhospho [T3(100); S18(100)]	10	1	A0A0R4J1L2	A0A0R4J1L2 [121-149]	A0A0R4J1L2 2xPhospho [T123(100); S138(100)]	Elongation factor 1-delta OS=Mus musculus OX=10090 GN=Eef1d PE=1 SV=1	2	18136.1	27012.3	Peak Found	High
High	[R].SIQLDGLVWGASK.[L]		8	1	A0A0R4J1L2	A0A0R4J1L2 [196-208]		Elongation factor 1-delta OS=Mus musculus OX=10090 GN=Eef1d PE=1 SV=1	0	40239.7	4021.54	High	Peak Found
High	[R].QSSGPGASSGPGGDHSELIVR.[I]	1xPhospho [S2(96.6)]	3	2	A0A0R4J1L2	A0A0R4J1L2 [39-59]	A0A0R4J1L2 1xPhospho [S40(96.6)]	Elongation factor 1-delta OS=Mus musculus OX=10090 GN=Eef1d PE=1 SV=1	0	56945.3	37761.1	High	High
High	[R].ITSLEVENQNLR.[G]		10	1	A0A0R4J1L2	A0A0R4J1L2 [60-71]		Elongation factor 1-delta OS=Mus musculus OX=10090 GN=Eef1d PE=1 SV=1	0	14294.9	10429	High	Peak Found
High	[R].NGPLNESQEEEEDGEQGSNLNR.[E]	1xPhospho [S7(99.7)]	2	1	A0A0R4J1T3	A0A0R4J1T3 [318-339]	A0A0R4J1T3 1xPhospho [S324(99.7)]	Serine/threonine-protein kinase TAO3 (Fragment) OS=Mus musculus OX=10090 GN=Taok3 PE=1 SV=1	0	14971.9	11410.8	Peak Found	High
High	[R].ALSHQEPMVNSQPAPR.[S]	1xPhospho [S3(100)]	3	1	A0A0R4J1U7	A0A0R4J1U7 [50-65]	A0A0R4J1U7 1xPhospho [S52(100)]	RAS protein activator-like-3 OS=Mus musculus OX=10090 GN=Rasal3 PE=1 SV=1	0	70266.2	41735.5	High	Peak Found
High	[K].RPASPSSPEHLPATPAESPAQR.[F]	2xPhospho [S4(99.8); S7(83.2)]	2	3	A0A0R4J243	A0A0R4J243 [231-252]	A0A0R4J243 2xPhospho [S234(99.8); S237(83.2)]	Sin3 histone deacetylase corepressor complex component SDS3 OS=Mus musculus OX=10090 GN=Suds3 PE=1 SV=1	0	565925	283033	High	High
High	[K].VGVAEGSPVSR.[R]	1xPhospho [S7(100)]	2	1	A0A0R4J257	A0A0R4J257 [143-153]	A0A0R4J257 1xPhospho [S149(100)]	Protein unc-13 homolog D OS=Mus musculus OX=10090 GN=Unc13d PE=1 SV=1	0	11249.6	8811.76	High	Peak Found
High	[K].EGSLGDELLPLGYAEPEPQEGASAGAPSPTLELASR.[S]	2xPhospho [S23(99.4); S28(95.9)]	2	2	A0A0R4J2B2	A0A0R4J2B2 [151-186]	A0A0R4J2B2 2xPhospho [S173(99.4); S178(95.9)]	BTB/POZ domain-containing protein KCTD12 OS=Mus musculus OX=10090 GN=Kctd12 PE=1 SV=1	0	70015	20214.9	High	Peak Found
High	[K].EGSLGDELLPLGYAEPEPQEGASAGAPSPTLELASR.[S]	1xPhospho [S/T/Y]	2	2	A0A0R4J2B2	A0A0R4J2B2 [151-186]		BTB/POZ domain-containing protein KCTD12 OS=Mus musculus OX=10090 GN=Kctd12 PE=1 SV=1	0	1.10889e+06	512358	High	High
High	[R].SPSGGAAGPLLTPSQSLDGSR.[R]	1xPhospho [S1(97.9)]	2	6	A0A0R4J2B2	A0A0R4J2B2 [187-207]	A0A0R4J2B2 1xPhospho [S187(97.9)]	BTB/POZ domain-containing protein KCTD12 OS=Mus musculus OX=10090 GN=Kctd12 PE=1 SV=1	0	385742	198802	High	High
High	[R].SGYITIGYR.[G]	1xPhospho [S1(99.9)]	2	2	A0A0R4J2B2	A0A0R4J2B2 [209-217]	A0A0R4J2B2 1xPhospho [S209(99.9)]	BTB/POZ domain-containing protein KCTD12 OS=Mus musculus OX=10090 GN=Kctd12 PE=1 SV=1	0	41565	23862.5	High	High
High	[K].HSLDSDEEDDDEEGSSK.[Y]	1xPhospho [S5(99.7)]	4	1	A0A0U1RNG1	A0A0U1RNG1 [45-61]	A0A0U1RNG1 1xPhospho [S49(99.7)]	CD2 antigen cytoplasmic tail-binding protein 2 (Fragment) OS=Mus musculus OX=10090 GN=Cd2bp2 PE=1 SV=1	0	16571.7	11423.2	High	Peak Found
High	[K].HSLDSDEEDDDEEGSSKYDILASEDVEGQEAATLPSEGGVR.[I]	1xPhospho [S5(75.2)]	3	1	A0A0U1RNG1	A0A0U1RNG1 [45-85]	A0A0U1RNG1 1xPhospho [S49(75.2)]	CD2 antigen cytoplasmic tail-binding protein 2 (Fragment) OS=Mus musculus OX=10090 GN=Cd2bp2 PE=1 SV=1	1	76383.1	63348.4	Peak Found	High
High	[R].FEPESPGFESR.[S]	1xPhospho [S5(100)]	2	1	A0A0U1RNU4	A0A0U1RNU4 [79-89]	A0A0U1RNU4 1xPhospho [S83(100)]	Zinc finger protein 768 OS=Mus musculus OX=10090 GN=Zfp768 PE=1 SV=1	0	18834.9	18435.9	Peak Found	High
High	[R].ADANLLTDTGTESSPR.[S]	1xPhospho [T/S]	3	1	A0A0U1RPC2	A0A0U1RPC2 [7-22]		Exosome complex component RRP46 OS=Mus musculus OX=10090 GN=Exosc5 PE=1 SV=1	0	22006	15670.6	High	Peak Found
High	[R].GFYSVETFLLLLALK.[IV]		2	1	A0A0U1RPR5	A0A0U1RPR5 [44-58]		Serine/threonine-protein phosphatase 4 catalytic subunit (Fragment) OS=Mus musculus OX=10090 GN=Ppp4c PE=1 SV=1	0	32166.7		High	Not Found
High	[R].LTTIAHNMSGPNSSSEWSIEGR.[R]	2xPhospho [S18(97.4); S/T]	2	1	A0A0U1RPW3	A0A0U1RPW3 [76-97]	A0A0U1RPW3 2xPhospho [S93(97.4); S/T]	BRCA2-interacting transcriptional repressor EMSY (Fragment) OS=Mus musculus OX=10090 GN=Emsy PE=1 SV=2	0			Not Found	High
High	[-].ALLQMDAIDLTDKLVSYYLESYGLELTMTVLR.[D]	1xAcetyl [N-Term]; 1xOxidation [M5]	1	1	A0A0U1RQ20	A0A0U1RQ20 [1-32]	A0A0U1RQ20 1xAcetyl [N-Term]	Apoptosis-associated speck-like protein-containing a CARD (Fragment) OS=Mus musculus OX=10090 GN=Pycard PE=1 SV=1	1		20993.7	Not Found	High
High	[K].EIHPYLVMDLEQS.[-]	1xOxidation [M8]; 1xPhospho [S13(100)]	2	6	A0A0U1RQ20; Q9EPB4	A0A0U1RQ20 [139-151]; Q9EPB4 [181-193]	A0A0U1RQ20 1xPhospho [S151(100)]; Q9EPB4 1xPhospho [S193(100)]	Apoptosis-associated speck-like protein-containing a CARD (Fragment) OS=Mus musculus OX=10090 GN=Pycard PE=1 SV=1 Apoptosis-associated speck-like protein containing a CARD OS=Mus musculus OX=10090 GN=Pycard PE=1 SV=1	0	174705	90645	High	High
High	[K].EIHPYLVMDLEQS.[-]	1xPhospho [S13(100)]	2	2	A0A0U1RQ20; Q9EPB4	A0A0U1RQ20 [139-151]; Q9EPB4 [181-193]	A0A0U1RQ20 1xPhospho [S151(100)]; Q9EPB4 1xPhospho [S193(100)]	Apoptosis-associated speck-like protein-containing a CARD (Fragment) OS=Mus musculus OX=10090 GN=Pycard PE=1 SV=1 Apoptosis-associated speck-like protein containing a CARD OS=Mus musculus OX=10090 GN=Pycard PE=1 SV=1	0	720153	468984	High	High
High	[K].LVSYYLESYGLELTMTVLR.[D]		2	2	A0A0U1RQ20; Q9EPB4	A0A0U1RQ20 [14-32]; Q9EPB4 [56-74]		Apoptosis-associated speck-like protein-containing a CARD (Fragment) OS=Mus musculus OX=10090 GN=Pycard PE=1 SV=1 Apoptosis-associated speck-like protein containing a CARD OS=Mus musculus OX=10090 GN=Pycard PE=1 SV=1	0	186290	89314.4	High	High
High	[R].VTEVDGVLDALHGSVLTEGQYQAVR.[A]		2	1	A0A0U1RQ20; Q9EPB4	A0A0U1RQ20 [82-106]; Q9EPB4 [124-148]		Apoptosis-associated speck-like protein-containing a CARD (Fragment) OS=Mus musculus OX=10090 GN=Pycard PE=1 SV=1 Apoptosis-associated speck-like protein containing a CARD OS=Mus musculus OX=10090 GN=Pycard PE=1 SV=1	0	65213.4		High	Not Found
High	[K].CFEISDADTK.[E]	1xCarbamidomethyl [C1]; 2xPhospho [S5(100); T9(100)]	3	1	A0A0U1RQ54	A0A0U1RQ54 [55-64]	A0A0U1RQ54 2xPhospho [S59(100); T63(100)]	Serine/threonine-protein kinase PLK1 (Fragment) OS=Mus musculus OX=10090 GN=Plk1 PE=1 SV=1	0	3.78939e+06	2.91875e+06	High	Peak Found
High	[R].TEARSSDEENGPPSSPDLDR.[I]	1xPhospho [S6(88.2)]	5	1	A0A140LHA0	A0A140LHA0 [90-109]	A0A140LHA0 1xPhospho [S95(88.2)]	Proline-rich AKT1 substrate 1 (Fragment) OS=Mus musculus OX=10090 GN=Akt1s1 PE=1 SV=1	1	79126.8	56403.7	High	Peak Found
High	[R].TEARSSDEENGPPSSPDLDR.[I]	2xPhospho [S5(92.5); S6(78.3)]	5	1	A0A140LHA0	A0A140LHA0 [90-109]	A0A140LHA0 2xPhospho [S94(92.5); S95(78.3)]	Proline-rich AKT1 substrate 1 (Fragment) OS=Mus musculus OX=10090 GN=Akt1s1 PE=1 SV=1	1	15494.6	9667.75	High	Peak Found
High	[R].SSDEENGPPSSPDLDR.[I]	1xPhospho [S1(81.6)]	5	1	A0A140LHA0	A0A140LHA0 [94-109]	A0A140LHA0 1xPhospho [S94(81.6)]	Proline-rich AKT1 substrate 1 (Fragment) OS=Mus musculus OX=10090 GN=Akt1s1 PE=1 SV=1	0	41838.2	33981	Peak Found	High
High	[R].ILPWLVSQLDLGQLEGVAWLDESR.[T]		2	1	A0A140LHE6	A0A140LHE6 [8-31]		Interferon regulatory factor 3 (Fragment) OS=Mus musculus OX=10090 GN=Irf3 PE=1 SV=1	0	87470.3		High	Not Found
High	[K].EQADFALEALAK.[A]		3	1	A0A140LI60	A0A140LI60 [117-128]		Myosin-14 (Fragment) OS=Mus musculus OX=10090 GN=Myh14 PE=1 SV=1	0	12104.9	8659.38	High	Peak Found
High	[R].IQSIPLVIGQFLEAVDQNTAIVGSTTGSNYYVR.[I]		2	1	A0A140LIZ5	A0A140LIZ5 [51-83]		26S proteasome regulatory subunit 6B OS=Mus musculus OX=10090 GN=Psmc4 PE=1 SV=1	0	73069.8		High	Not Found
High	[R].SFLVSYIANK.[K]	1xPhospho [S1(100)]	7	2	A0A140LJK5	A0A140LJK5 [58-67]	A0A140LJK5 1xPhospho [S58(100)]	Glutamine--tRNA ligase (Fragment) OS=Mus musculus OX=10090 GN=Qars PE=1 SV=2	0	29971.5	12783	High	High
High	[R].DFATPTLHTSDQSPGR.[Q]	1xPhospho [T/S]	2	2	A0A171EBL2	A0A171EBL2 [2221-2236]		E3 ubiquitin-protein ligase RNF213 OS=Mus musculus OX=10090 GN=Rnf213 PE=1 SV=1	0	52602.1	35505.5	High	High
High	[K].DLGQYVSVVVLDEVGLAEDSPK.[M]		2	1	A0A171EBL2	A0A171EBL2 [2793-2814]		E3 ubiquitin-protein ligase RNF213 OS=Mus musculus OX=10090 GN=Rnf213 PE=1 SV=1	0	56738.3		High	Not Found
High	[R].SWLSVVPLESLSSYLENSIDYLSDVPVR.[V]		2	1	A0A171EBL2	A0A171EBL2 [732-759]		E3 ubiquitin-protein ligase RNF213 OS=Mus musculus OX=10090 GN=Rnf213 PE=1 SV=1	0	34544.4		High	Not Found
High	[R].DRLEIYEDVLFFLSK.[K]		2	1	A0A1B0GRU8	A0A1B0GRU8 [472-486]		Pre-mRNA-processing factor 40 homolog A OS=Mus musculus OX=10090 GN=Prpf40a PE=1 SV=1	1		22637.4	Not Found	High
High	[K].DKGFVVEVNTTFEDFVAIISSTK.[R]		2	1	A0A1B0GRU8	A0A1B0GRU8 [654-676]		Pre-mRNA-processing factor 40 homolog A OS=Mus musculus OX=10090 GN=Prpf40a PE=1 SV=1	1	28544.9	15400	Peak Found	High
High	[K].TGAFLLQGFIQDR.[A]		5	1	A0A1B0GS13	A0A1B0GS13 [35-47]		Apoptosis regulator BAX (Fragment) OS=Mus musculus OX=10090 GN=Bax PE=1 SV=1	0	21906.9		High	Not Found
High	[R].ETLPAEQDLTTK.[N]		2	1	A0A1B0GS70	A0A1B0GS70 [172-183]		Proteasome endopeptidase complex OS=Mus musculus OX=10090 GN=Psma1 PE=1 SV=1	0	21326.5	30973.7	High	Peak Found
High	[K].DLEFTIYDDDDVSPFLDGLEERPQR.[K]		2	1	A0A1B0GS70	A0A1B0GS70 [193-217]		Proteasome endopeptidase complex OS=Mus musculus OX=10090 GN=Psma1 PE=1 SV=1	0	287664	99209.3	Peak Found	High
High	[K].TQIPTQR.[Y]		2	1	A0A1B0GS70	A0A1B0GS70 [91-97]		Proteasome endopeptidase complex OS=Mus musculus OX=10090 GN=Psma1 PE=1 SV=1	0	16718.7	17432.6	Peak Found	High
High	[K].ELVLSNNDLHEPGVR.[I]		3	1	A0A1B0GSG5	A0A1B0GSG5 [205-219]		Ribonuclease inhibitor OS=Mus musculus OX=10090 GN=Rnh1 PE=1 SV=1	0	21672	21776	Peak Found	High
High	[K].ASLQELDLSSNK.[L]		2	1	A0A1B0GSG5	A0A1B0GSG5 [258-269]		Ribonuclease inhibitor OS=Mus musculus OX=10090 GN=Rnh1 PE=1 SV=1	0	81687.9	64835.3	Peak Found	High
High	[K].ELSLASNELKDEGAR.[L]		2	1	A0A1B0GSG5	A0A1B0GSG5 [319-333]		Ribonuclease inhibitor OS=Mus musculus OX=10090 GN=Rnh1 PE=1 SV=1	1	20095.8	12804.4	High	Peak Found
High	[K].ALSQPDTVLR.[E]		2	2	A0A1B0GSG5	A0A1B0GSG5 [395-404]		Ribonuclease inhibitor OS=Mus musculus OX=10090 GN=Rnh1 PE=1 SV=1	0	19700.9	20425.2	High	High
High	[K].QPSCTLQQLVLYDIYWTNEVEEQLR.[A]	1xCarbamidomethyl [C4]	2	1	A0A1B0GSG5	A0A1B0GSG5 [455-479]		Ribonuclease inhibitor OS=Mus musculus OX=10090 GN=Rnh1 PE=1 SV=1	0	230456		High	Not Found
High	[R].WTELLPLIQQYEVVR.[L]		4	1	A0A1B0GSG5	A0A1B0GSG5 [51-65]		Ribonuclease inhibitor OS=Mus musculus OX=10090 GN=Rnh1 PE=1 SV=1	0	112089		High	Not Found
High	[R].LLWTLESLVTGR.[A]		3	1	A0A1B0GSU0	A0A1B0GSU0 [118-129]		Aldehyde dehydrogenase family 16 member A1 OS=Mus musculus OX=10090 GN=Aldh16a1 PE=1 SV=1	0	99110.1	19909.9	High	Peak Found
High	[R].GAELGLALGTESLLLLMDSADVDSAVEGVVDAVWSDR.[S]		2	1	A0A1B0GSU0	A0A1B0GSU0 [266-302]		Aldehyde dehydrogenase family 16 member A1 OS=Mus musculus OX=10090 GN=Aldh16a1 PE=1 SV=1	0		31866.4	Not Found	High
High	[R].LGQALELGYGLQVGTVWINAHGLR.[D]		3	2	A0A1B0GSU0	A0A1B0GSU0 [435-458]		Aldehyde dehydrogenase family 16 member A1 OS=Mus musculus OX=10090 GN=Aldh16a1 PE=1 SV=1	0	116525	113883	High	High
High	[R].AGLLWALAAALER.[R]		4	1	A0A1B0GSU0	A0A1B0GSU0 [589-601]		Aldehyde dehydrogenase family 16 member A1 OS=Mus musculus OX=10090 GN=Aldh16a1 PE=1 SV=1	0	72138.3		High	Not Found
High	[K].LVIITAGAR.[QM]		12	2	A0A1B0GSX0	A0A1B0GSX0 [120-128]		L-lactate dehydrogenase OS=Mus musculus OX=10090 GN=Ldha PE=1 SV=1	0	39375.7	26465.3	High	High
High	[K].FIIPNIVK.[Y]		7	1	A0A1B0GSX0	A0A1B0GSX0 [148-155]		L-lactate dehydrogenase OS=Mus musculus OX=10090 GN=Ldha PE=1 SV=1	0	15232.8		High	Not Found
High	[K].LLIVSNPVDILTYVAWK.[I]		6	2	A0A1B0GSX0	A0A1B0GSX0 [162-178]		L-lactate dehydrogenase OS=Mus musculus OX=10090 GN=Ldha PE=1 SV=1	0	2.35097e+06	225667	High	High
High	[K].SLNPELGTDADKEQWK.[E]		4	1	A0A1B0GSX0	A0A1B0GSX0 [242-257]		L-lactate dehydrogenase OS=Mus musculus OX=10090 GN=Ldha PE=1 SV=1	1	22476	33649.5	Peak Found	High
High	[K].QVVDSAYEVIK.[L]		3	2	A0A1B0GSX0	A0A1B0GSX0 [262-272]		L-lactate dehydrogenase OS=Mus musculus OX=10090 GN=Ldha PE=1 SV=1	0	63171.7	65110.6	High	High
High	[K].LKGYTSWAIGLSVADLAESIMK.[N]		3	2	A0A1B0GSX0	A0A1B0GSX0 [273-294]		L-lactate dehydrogenase OS=Mus musculus OX=10090 GN=Ldha PE=1 SV=1	1	272035	82409.1	High	High
High	[K].GYTSWAIGLSVADLAESIMK.[N]	1xOxidation [M19]	3	2	A0A1B0GSX0	A0A1B0GSX0 [275-294]		L-lactate dehydrogenase OS=Mus musculus OX=10090 GN=Ldha PE=1 SV=1	0	1.01512e+06	182849	High	High
High	[K].GYTSWAIGLSVADLAESIMK.[N]		3	2	A0A1B0GSX0	A0A1B0GSX0 [275-294]		L-lactate dehydrogenase OS=Mus musculus OX=10090 GN=Ldha PE=1 SV=1	0	6.21337e+06	575816	High	High
High	[K].VTLTPEEEAR.[L]		3	2	A0A1B0GSX0	A0A1B0GSX0 [335-344]		L-lactate dehydrogenase OS=Mus musculus OX=10090 GN=Ldha PE=1 SV=1	0	100544	154530	High	High
High	[K].SADTLWGIQK.[E]		3	1	A0A1B0GSX0	A0A1B0GSX0 [348-357]		L-lactate dehydrogenase OS=Mus musculus OX=10090 GN=Ldha PE=1 SV=1	0	27957.2	20140.2	High	Peak Found
High	[K].DQLIVNLLK.[E]		11	2	A0A1B0GSX0	A0A1B0GSX0 [35-43]		L-lactate dehydrogenase OS=Mus musculus OX=10090 GN=Ldha PE=1 SV=1	0	40737.1	36750.3	High	High
High	[K].ITVVGVGAVGMACAISILMK.[DG]	1xCarbamidomethyl [C13]	11	2	A0A1B0GSX0	A0A1B0GSX0 [52-71]		L-lactate dehydrogenase OS=Mus musculus OX=10090 GN=Ldha PE=1 SV=1	0	2.04111e+06	700012	High	High
High	[K].ITVVGVGAVGMACAISILMK.[DG]	1xCarbamidomethyl [C13]; 1xOxidation [M]	11	4	A0A1B0GSX0	A0A1B0GSX0 [52-71]		L-lactate dehydrogenase OS=Mus musculus OX=10090 GN=Ldha PE=1 SV=1	0	578050	303517	High	High
High	[K].DLADELALVDVMEDKLKGEMMDLQHGSLFLK.[T]		8	1	A0A1B0GSX0	A0A1B0GSX0 [72-102]		L-lactate dehydrogenase OS=Mus musculus OX=10090 GN=Ldha PE=1 SV=1	2	169321	71634.7	Peak Found	High
High	[K].DLADELALVDVMEDK.[L]		10	1	A0A1B0GSX0	A0A1B0GSX0 [72-86]		L-lactate dehydrogenase OS=Mus musculus OX=10090 GN=Ldha PE=1 SV=1	0	122498	75985.9	Peak Found	High
High	[R].TSPEPQRENASPAPGTTAEEAMSR.[G]	2xPhospho [S11(87.9); T/S]	6	1	A0A1B0GX81	A0A1B0GX81 [1020-1043]	A0A1B0GX81 2xPhospho [S1030(87.9); T/S]	Large proline-rich protein BAG6 (Fragment) OS=Mus musculus OX=10090 GN=Bag6 PE=1 SV=1	1	21271.4	17709.9	High	Peak Found
High	[R].ENASPAPGTTAEEAMSR.[G]	1xPhospho [S4(96.1)]	6	1	A0A1B0GX81	A0A1B0GX81 [1027-1043]	A0A1B0GX81 1xPhospho [S1030(96.1)]	Large proline-rich protein BAG6 (Fragment) OS=Mus musculus OX=10090 GN=Bag6 PE=1 SV=1	0	18838.9	18926.5	Peak Found	High
High	[R].ENASPAPGTTAEEAMSR.[G]	1xOxidation [M15]; 1xPhospho [S4(99.9)]	6	1	A0A1B0GX81	A0A1B0GX81 [1027-1043]	A0A1B0GX81 1xPhospho [S1030(99.9)]	Large proline-rich protein BAG6 (Fragment) OS=Mus musculus OX=10090 GN=Bag6 PE=1 SV=1	0			High	Not Found
High	[R].DLELLIQTATR.[D]		4	1	A0A1C7CYU3	A0A1C7CYU3 [152-162]		Nucleobindin-1 OS=Mus musculus OX=10090 GN=Nucb1 PE=1 SV=1	0	92604.1	9240.41	High	Peak Found
High	[R].YLESLGEEQR.[K]		5	1	A0A1C7CYU3	A0A1C7CYU3 [189-198]		Nucleobindin-1 OS=Mus musculus OX=10090 GN=Nucb1 PE=1 SV=1	0	14402.5	19152	Peak Found	High
High	[K].VNVPGSQAQLK.[E]		3	1	A0A1C7CYU3	A0A1C7CYU3 [218-228]		Nucleobindin-1 OS=Mus musculus OX=10090 GN=Nucb1 PE=1 SV=1	0	9891.92	15113	High	Peak Found
High	[K].EVWEELDGLDPNR.[F]		3	2	A0A1C7CYU3	A0A1C7CYU3 [229-241]		Nucleobindin-1 OS=Mus musculus OX=10090 GN=Nucb1 PE=1 SV=1	0	25876.2	19806.4	High	High
High	[K].TFFILHDINSDGVLDEQELEALFTK.[E]		3	1	A0A1C7CYU3	A0A1C7CYU3 [246-270]		Nucleobindin-1 OS=Mus musculus OX=10090 GN=Nucb1 PE=1 SV=1	0	1.31194e+06	164710	High	Peak Found
High	[R].LSQETEALGR.[S]		3	1	A0A1C7CYU3	A0A1C7CYU3 [367-376]		Nucleobindin-1 OS=Mus musculus OX=10090 GN=Nucb1 PE=1 SV=1	0	13330.2	24291.6	High	Peak Found
High	[K].KVPEQPPELPQLDSQHL.[-]	1xPhospho [S14(100)]	2	1	A0A1C7CYU3	A0A1C7CYU3 [439-455]	A0A1C7CYU3 1xPhospho [S452(100)]	Nucleobindin-1 OS=Mus musculus OX=10090 GN=Nucb1 PE=1 SV=1	1	238763	4821.08	High	Peak Found
High	[K].VPEQPPELPQLDSQHL.[-]	1xPhospho [S13(100)]	2	1	A0A1C7CYU3	A0A1C7CYU3 [440-455]	A0A1C7CYU3 1xPhospho [S452(100)]	Nucleobindin-1 OS=Mus musculus OX=10090 GN=Nucb1 PE=1 SV=1	0	25689.8		High	Not Found
High	[K].SGKLSQELDFVSHNVR.[T]	1xPhospho [S5(99.9)]	4	4	A0A1C7CYU3	A0A1C7CYU3 [81-96]	A0A1C7CYU3 1xPhospho [S85(99.9)]	Nucleobindin-1 OS=Mus musculus OX=10090 GN=Nucb1 PE=1 SV=1	1	63058.6		High	Not Found
High	[K].VIHDNFGIVEGLMTTVHAITATQK.[T]		5	2	A0A1D5RLD8	A0A1D5RLD8 [161-184]		Glyceraldehyde-3-phosphate dehydrogenase OS=Mus musculus OX=10090 GN=Gm10358 PE=1 SV=1	0	450178	50957.2	High	High
High	[K].VEIVAINDPFIDLNYMVYMFQYDSTHGK.[F]		5	2	A0A1D5RLD8	A0A1D5RLD8 [26-53]		Glyceraldehyde-3-phosphate dehydrogenase OS=Mus musculus OX=10090 GN=Gm10358 PE=1 SV=1	0	2.97232e+06	309522	High	High
High	[K].VEIVAINDPFIDLNYMVYMFQYDSTHGK.[F]	1xOxidation [M19]	5	1	A0A1D5RLD8	A0A1D5RLD8 [26-53]		Glyceraldehyde-3-phosphate dehydrogenase OS=Mus musculus OX=10090 GN=Gm10358 PE=1 SV=1	0	390949	43461.5	High	Peak Found
High	[K].LISWYDNEYGYSNR.[V]		5	1	A0A1D5RLD8	A0A1D5RLD8 [308-321]		Glyceraldehyde-3-phosphate dehydrogenase OS=Mus musculus OX=10090 GN=Gm10358 PE=1 SV=1	0	39083.8	10464.7	High	Peak Found
High	[K].WGEAGAEYVVESTGVFTTMEK.[A]		5	3	A0A1D5RLD8	A0A1D5RLD8 [85-105]		Glyceraldehyde-3-phosphate dehydrogenase OS=Mus musculus OX=10090 GN=Gm10358 PE=1 SV=1	0	843392	194733	High	High
High	[R].ISDSESEELPKPR.[V]	2xPhospho [S2(100); S4(99)]	2	2	A0A1D5RLV0	A0A1D5RLV0 [182-194]	A0A1D5RLV0 2xPhospho [S183(100); S185(99)]	Protein IWS1 homolog OS=Mus musculus OX=10090 GN=Iws1 PE=1 SV=1	0	60702.1	42764.9	High	Peak Found
High	[R].ISDSESEELPKPR.[V]	1xPhospho [S4(99.9)]	2	5	A0A1D5RLV0	A0A1D5RLV0 [182-194]	A0A1D5RLV0 1xPhospho [S185(99.9)]	Protein IWS1 homolog OS=Mus musculus OX=10090 GN=Iws1 PE=1 SV=1	0	432214	394595	High	High
High	[R].VSDSESEDPPRPQASDSESEELPKPR.[V]	2xPhospho [S4(83.6); S19(83.5)]	2	1	A0A1D5RLV0	A0A1D5RLV0 [195-220]; [221-246]	A0A1D5RLV0 2xPhospho [S198(83.6); S213(83.5)]; 2xPhospho [S224(83.6); S239(83.5)]	Protein IWS1 homolog OS=Mus musculus OX=10090 GN=Iws1 PE=1 SV=1	0	119201	76524.3	High	Peak Found
High	[R].VSDSESEDPPRPQASDSESEELPKPR.[V]	1xPhospho [S15(84.5)]	2	4	A0A1D5RLV0	A0A1D5RLV0 [195-220]; [221-246]	A0A1D5RLV0 1xPhospho [S209(84.5)]; 1xPhospho [S235(84.5)]	Protein IWS1 homolog OS=Mus musculus OX=10090 GN=Iws1 PE=1 SV=1	0	293779	184308	High	High
High	[R].KAAVLSDSEDDAGNASAK.[K]	2xPhospho [S6(100); S8(99.9)]	2	1	A0A1D5RLV0	A0A1D5RLV0 [338-355]	A0A1D5RLV0 2xPhospho [S343(100); S345(99.9)]	Protein IWS1 homolog OS=Mus musculus OX=10090 GN=Iws1 PE=1 SV=1	1	59274.4	41941.2	High	Peak Found
High	[R].KAAVLSDSEDDAGNASAK.[K]	1xPhospho [S8(99.5)]	2	2	A0A1D5RLV0	A0A1D5RLV0 [338-355]	A0A1D5RLV0 1xPhospho [S345(99.5)]	Protein IWS1 homolog OS=Mus musculus OX=10090 GN=Iws1 PE=1 SV=1	1	18390.8	15782.9	High	High
High	[K].AAVLSDSEDDAGNASAK.[K]	2xPhospho [S5(100); S7(100)]	2	3	A0A1D5RLV0	A0A1D5RLV0 [339-355]	A0A1D5RLV0 2xPhospho [S343(100); S345(100)]	Protein IWS1 homolog OS=Mus musculus OX=10090 GN=Iws1 PE=1 SV=1	0	59399.5	30757.7	High	High
High	[K].AAVLSDSEDDAGNASAK.[K]	1xPhospho [S5(97.8)]	2	2	A0A1D5RLV0	A0A1D5RLV0 [339-355]	A0A1D5RLV0 1xPhospho [S343(97.8)]	Protein IWS1 homolog OS=Mus musculus OX=10090 GN=Iws1 PE=1 SV=1	0	45451	51151	High	High
High	[R].VVCDADDSDSDVVSDK.[S]	1xCarbamidomethyl [C3]; 1xPhospho [S8(81.4)]	3	2	A0A1D5RLV0	A0A1D5RLV0 [359-374]	A0A1D5RLV0 1xPhospho [S366(81.4)]	Protein IWS1 homolog OS=Mus musculus OX=10090 GN=Iws1 PE=1 SV=1	0			High	High
High	[R].ETTVASDSEEEAGKEESSVK.[K]	1xPhospho [S/T]	3	1	A0A1D5RLV0	A0A1D5RLV0 [379-398]		Protein IWS1 homolog OS=Mus musculus OX=10090 GN=Iws1 PE=1 SV=1	1	28219.3		High	Not Found
High	[R].SQERPPETPPTSVSESLPTLSDSDPVPVADSDDDAGSESAAR.[D]	1xPhospho [S31(91.3)]	2	2	A0A1D5RLY6	A0A1D5RLY6 [694-735]	A0A1D5RLY6 1xPhospho [S724(91.3)]	Microtubule-associated protein 1S OS=Mus musculus OX=10090 GN=Map1s PE=1 SV=1	0	145674	72160.5	High	High
High	[K].ENILSPTGLMLDGTSR.[F]	1xOxidation [M10]; 2xPhospho [S5(76); S15(75.6)]	1	1	A0A1D5RMB0	A0A1D5RMB0 [122-137]	A0A1D5RMB0 2xPhospho [S126(76); S136(75.6)]	Alcohol dehydrogenase 6B (class V) OS=Mus musculus OX=10090 GN=Adh6b PE=3 SV=1	0		16365.9	Not Found	High
High	[K].NVVALDTEVTNNR.[I]		2	2	A0A1L1SRE8	A0A1L1SRE8 [429-441]		Low-density lipoprotein receptor OS=Mus musculus OX=10090 GN=Ldlr PE=1 SV=1	0	23635.6	18332.1	High	High
High	[R].VLSSTSEEDEPGVVK.[F]	1xPhospho [S/T]	3	1	A0A1L1SSS4	A0A1L1SSS4 [171-185]		Nuclear receptor coactivator 7 OS=Mus musculus OX=10090 GN=Ncoa7 PE=1 SV=1	0	66630.2	51535.5	Peak Found	High
High	[K].DVQDAIAQSPEK.[E]	1xPhospho [S9(100)]	2	1	A0A1L1STF9	A0A1L1STF9 [281-292]	A0A1L1STF9 1xPhospho [S289(100)]	SAFB-like transcription modulator OS=Mus musculus OX=10090 GN=Sltm PE=1 SV=1	0	293613	256279	Peak Found	High
High	[K].LVSIGAEEIVDGNAK.[M]		5	1	A0A1L1SV25	A0A1L1SV25 [127-141]		Alpha-actinin-4 OS=Mus musculus OX=10090 GN=Actn4 PE=1 SV=1	0	47394.5	16775.2	Peak Found	High
High	[K].MTLGMIWTIILR.[F]		9	2	A0A1L1SV25; A1BN54	A0A1L1SV25 [142-153]; A1BN54 [122-133]		Alpha-actinin-4 OS=Mus musculus OX=10090 GN=Actn4 PE=1 SV=1 Alpha actinin 1a OS=Mus musculus OX=10090 GN=Actn1 PE=1 SV=1	0	61442.1	27764.6	High	High
High	[R].FAIQDISVEETSAK.[E]		9	1	A0A1L1SV25; A1BN54	A0A1L1SV25 [154-167]; A1BN54 [134-147]		Alpha-actinin-4 OS=Mus musculus OX=10090 GN=Actn4 PE=1 SV=1 Alpha actinin 1a OS=Mus musculus OX=10090 GN=Actn1 PE=1 SV=1	0	39078.7	21984.4	Peak Found	High
High	[RK].LASDLLEWIR.[R]		5	2	A0A1L1SV25; A1BN54	A0A1L1SV25 [302-311]; A1BN54 [282-291]		Alpha-actinin-4 OS=Mus musculus OX=10090 GN=Actn4 PE=1 SV=1 Alpha actinin 1a OS=Mus musculus OX=10090 GN=Actn1 PE=1 SV=1	0	94224.2	34388.4	High	High
High	[R].DLLLDPAWEK.[Q]		7	1	A0A1L1SV25; A1BN54	A0A1L1SV25 [42-51]; A1BN54 [22-31]		Alpha-actinin-4 OS=Mus musculus OX=10090 GN=Actn4 PE=1 SV=1 Alpha actinin 1a OS=Mus musculus OX=10090 GN=Actn1 PE=1 SV=1	0	5043.66	9765.57	Peak Found	High
High	[R].TINEVENQILTR.[D]		5	2	A0A1L1SV25; A1BN54	A0A1L1SV25 [747-758]; A1BN54 [727-738]		Alpha-actinin-4 OS=Mus musculus OX=10090 GN=Actn4 PE=1 SV=1 Alpha actinin 1a OS=Mus musculus OX=10090 GN=Actn1 PE=1 SV=1	0	20170.8	13639.6	High	High
High	[R].IMSVVDPNHSGLVTFQAFIDFMSR.[E]		3	2	A0A1L1SV25	A0A1L1SV25 [835-858]		Alpha-actinin-4 OS=Mus musculus OX=10090 GN=Actn4 PE=1 SV=1	0	1.11545e+06	188788	High	High
High	[R].IMSVVDPNHSGLVTFQAFIDFMSR.[E]	1xOxidation [M2]	3	2	A0A1L1SV25	A0A1L1SV25 [835-858]		Alpha-actinin-4 OS=Mus musculus OX=10090 GN=Actn4 PE=1 SV=1	0	341506	95784.1	High	High
High	[K].LMLLLEVISGER.[L]		7	2	A0A1L1SV25; A1BN54	A0A1L1SV25 [85-96]; A1BN54 [65-76]		Alpha-actinin-4 OS=Mus musculus OX=10090 GN=Actn4 PE=1 SV=1 Alpha actinin 1a OS=Mus musculus OX=10090 GN=Actn1 PE=1 SV=1	0	389198	97226.3	High	High
High	[K].LMLLLEVISGER.[L]	1xOxidation [M2]	7	1	A0A1L1SV25; A1BN54	A0A1L1SV25 [85-96]; A1BN54 [65-76]		Alpha-actinin-4 OS=Mus musculus OX=10090 GN=Actn4 PE=1 SV=1 Alpha actinin 1a OS=Mus musculus OX=10090 GN=Actn1 PE=1 SV=1	0	195324	95175.7	Peak Found	High
High	[R].ETTDTDTADQVIASFK.[V]		3	1	A0A1L1SV25	A0A1L1SV25 [859-874]		Alpha-actinin-4 OS=Mus musculus OX=10090 GN=Actn4 PE=1 SV=1	0	20619.7	12133.1	High	Peak Found
High	[K].STETSDFENIESPLNER.[G]	1xPhospho [S/T]	2	1	A0A1L1SV73	A0A1L1SV73 [900-916]		Ubiquitin carboxyl-terminal hydrolase 47 OS=Mus musculus OX=10090 GN=Usp47 PE=1 SV=1	0	12152.4	10481.5	High	Peak Found
High	[R].ELEQHIQTSDPENFQSEER.[S]	1xPhospho [S9(84.4)]	2	1	A0A1L1SV73	A0A1L1SV73 [926-944]	A0A1L1SV73 1xPhospho [S934(84.4)]	Ubiquitin carboxyl-terminal hydrolase 47 OS=Mus musculus OX=10090 GN=Usp47 PE=1 SV=1	0	25886	34163.7	High	Peak Found
High	[-].MSQGDSNPAAIPHAAEDIQGDDR.[W]	1xMet-loss+Acetyl [N-Term]; 1xPhospho [S2(100)]	6	1	A0A1L1SVK0	A0A1L1SVK0 [1-23]	A0A1L1SVK0 1xMet-loss+Acetyl [N-Term]; 1xPhospho [S2(100)]	Platelet-activating factor acetylhydrolase IB subunit beta (Fragment) OS=Mus musculus OX=10090 GN=Pafah1b2 PE=1 SV=1	0	451091	352738	High	Peak Found
High	[K].DKEPDVLFVGDSMVQLMQQYEIWR.[E]		5	1	A0A1L1SVK0	A0A1L1SVK0 [37-60]		Platelet-activating factor acetylhydrolase IB subunit beta (Fragment) OS=Mus musculus OX=10090 GN=Pafah1b2 PE=1 SV=1	1	322217	24428.9	High	Peak Found
High	[K].VIVVWVGTNNHENTAEEVAGGIEAIVQLINTR.[Q]		2	1	A0A1L1SVK0	A0A1L1SVK0 [97-128]		Platelet-activating factor acetylhydrolase IB subunit beta (Fragment) OS=Mus musculus OX=10090 GN=Pafah1b2 PE=1 SV=1	0	134348		High	Not Found
High	[K].EAFQLFDR.[T]		3	2	A0A1W2P6F6	A0A1W2P6F6 [14-21]		Myosin light polypeptide 6 OS=Mus musculus OX=10090 GN=Myl6 PE=1 SV=1	0	30428.5	26345.6	High	High
High	[R].ALGQNPTNAEVLK.[V]		5	1	A0A1W2P6F6	A0A1W2P6F6 [38-50]		Myosin light polypeptide 6 OS=Mus musculus OX=10090 GN=Myl6 PE=1 SV=1	0	15879.7	10969.2	Peak Found	High
High	[K].NLVELAELELK.[H]		2	1	A0A1W2P701	A0A1W2P701 [260-270]		Sorting nexin-6 OS=Mus musculus OX=10090 GN=Snx6 PE=1 SV=1	0	24336.2		High	Not Found
High	[K].DLNFHVFLEYNQDLSVR.[G]		2	2	A0A1W2P701	A0A1W2P701 [44-60]		Sorting nexin-6 OS=Mus musculus OX=10090 GN=Snx6 PE=1 SV=1	0	37383.8	32361.5	High	High
High	[R].TAQFDISVASEIMAVLALTSSLEDMR.[E]		2	1	A0A1W2P733	A0A1W2P733 [378-403]		C-1-tetrahydrofolate synthase, cytoplasmic OS=Mus musculus OX=10090 GN=Mthfd1 PE=1 SV=1	0	45518		High	Not Found
High	[R].NSSPPPSPNK.[N]	1xPhospho [S3(100)]	2	3	A0A1W2P772	A0A1W2P772 [273-282]	A0A1W2P772 1xPhospho [S275(100)]	Plasma membrane calcium-transporting ATPase 1 (Fragment) OS=Mus musculus OX=10090 GN=Atp2b1 PE=1 SV=1	0	52137.9	59484.5	High	High
High	[-].MSHTILLVQPTK.[R]	1xMet-loss+Acetyl [N-Term]	3	1	A0A1W2P7T3	A0A1W2P7T3 [1-12]	A0A1W2P7T3 1xMet-loss+Acetyl [N-Term]	Enhancer of rudimentary homolog OS=Mus musculus OX=10090 GN=Erh PE=1 SV=1	0	9008.68	10855.2	High	Peak Found
High	[K].LQEEGGSEEEEAGNPSEDGMQSGPTQAPPR.[E]	1xOxidation [M20]; 1xPhospho [S7(99.8)]	2	3	A0A1W2P7U7	A0A1W2P7U7 [43-72]	A0A1W2P7U7 1xPhospho [S49(99.8)]	Periodic tryptophan protein 1 homolog OS=Mus musculus OX=10090 GN=Pwp1 PE=1 SV=1	0	56983.7	34154	High	High
High	[K].LQEEGGSEEEEAGNPSEDGMQSGPTQAPPR.[E]	1xPhospho [S7(95.4)]	2	1	A0A1W2P7U7	A0A1W2P7U7 [43-72]	A0A1W2P7U7 1xPhospho [S49(95.4)]	Periodic tryptophan protein 1 homolog OS=Mus musculus OX=10090 GN=Pwp1 PE=1 SV=1	0	51280.7	39067.6	Peak Found	High
High	[R].IAFDAESEPNNSSGSMEKR.[K]	1xPhospho [S]	2	1	A0A1Y7VIX9	A0A1Y7VIX9 [110-128]		Engulfment and cell motility protein 1 (Fragment) OS=Mus musculus OX=10090 GN=Elmo1 PE=1 SV=2	1	38999.4	24927.8	High	Peak Found
High	[R].AINNEMAHQLYVLQVLTFNLLEDR.[M]		2	1	A0A1Y7VIX9	A0A1Y7VIX9 [65-88]		Engulfment and cell motility protein 1 (Fragment) OS=Mus musculus OX=10090 GN=Elmo1 PE=1 SV=2	0			High	Not Found
High	[R].VQRPEDASGGSSPSGTSK.[S]	1xPhospho [S/T]	4	1	A0A1Y7VJA2	A0A1Y7VJA2 [220-237]		Ena/VASP-like protein (Fragment) OS=Mus musculus OX=10090 GN=Evl PE=1 SV=1	0	24416.2	15679.5	Peak Found	High
High	[R].SNSVEKPVSSLLSR.[TV]	1xPhospho [S]	4	1	A0A1Y7VJA2	A0A1Y7VJA2 [314-327]		Ena/VASP-like protein (Fragment) OS=Mus musculus OX=10090 GN=Evl PE=1 SV=1	0	188736	89361.1	High	Peak Found
High	[R].SNSLPHSAVSNAASK.[G]	1xPhospho [S]	4	1	A0A1Y7VJI5	A0A1Y7VJI5 [329-343]		WD repeat domain 20, retrogene (Fragment) OS=Mus musculus OX=10090 GN=Wdr20rt PE=4 SV=1	0			High	Not Found
High	[R].VLLFGDSITQFSFQQGGWGSLLADR.[L]		3	2	A0A1Y7VKA0	A0A1Y7VKA0 [17-41]		Isoamyl acetate-hydrolyzing esterase 1 homolog (Fragment) OS=Mus musculus OX=10090 GN=Iah1 PE=1 SV=1	0	360470	121773	High	High
High	[R].KVQEADLVIFQFPLYWFSVPAILK.[G]		3	1	A0A1Y7VL95	A0A1Y7VL95 [47-70]		Ribosyldihydronicotinamide dehydrogenase [quinone] OS=Mus musculus OX=10090 GN=Nqo2 PE=1 SV=1	1	158165	39917	Peak Found	High
High	[K].VQEADLVIFQFPLYWFSVPAILK.[G]		3	1	A0A1Y7VL95	A0A1Y7VL95 [48-70]		Ribosyldihydronicotinamide dehydrogenase [quinone] OS=Mus musculus OX=10090 GN=Nqo2 PE=1 SV=1	0	84697.4	21632.7	High	Peak Found
High	[K].AAKESEEEEEEEETEEK.[K]	1xPhospho [T14(90.9)]	4	1	A0A286YDA2	A0A286YDA2 [557-573]	A0A286YDA2 1xPhospho [T570(90.9)]	Nucleolar and coiled-body phosphoprotein 1 OS=Mus musculus OX=10090 GN=Nolc1 PE=1 SV=1	1			Not Found	High
High	[K].DLIGDQNR.[S]		3	1	A0A286YDF5	A0A286YDF5 [90-97]		Myoferlin OS=Mus musculus OX=10090 GN=Myof PE=1 SV=1	0	12608.4	13508	Peak Found	High
High	[K].VHAEDVLALLLEGSLVWAPR.[K]		4	1	A0A286YDJ6	A0A286YDJ6 [83-102]		Lysine-specific demethylase 3B OS=Mus musculus OX=10090 GN=Kdm3b PE=1 SV=1	0			High	Not Found
High	[K].FTNPLFEANNLVIWPSVAPQSLQLWEGIFLR.[W]		2	1	A0A286YE22	A0A286YE22 [42-72]		Myotubularin-related protein 9 (Fragment) OS=Mus musculus OX=10090 GN=Mtmr9 PE=1 SV=1	0	32261.4		High	Not Found
High	[R].SSSASSQEEKSHLEELAAGGIPIER.[A]	2xPhospho [S5(92.7); S6(96)]	6	1	A0A2I3BPP1	A0A2I3BPP1 [1316-1340]	A0A2I3BPP1 2xPhospho [S1320(92.7); S1321(96)]	Tuberin OS=Mus musculus OX=10090 GN=Tsc2 PE=1 SV=1	1	24473.4	11910.8	High	Peak Found
High	[R].NTEDLTEEWLR.[E]		3	1	A0A2I3BPS1	A0A2I3BPS1 [138-148]		Glia maturation factor beta (Fragment) OS=Mus musculus OX=10090 GN=Gmfb PE=1 SV=1	0			Not Found	High
High	[K].LDPTQTSFLK.[-M]		2	1	A0A2I3BPW0	A0A2I3BPW0 [264-273]		Protein NDRG2 (Fragment) OS=Mus musculus OX=10090 GN=Ndrg2 PE=1 SV=1	0	626181	492778	High	Peak Found
High	[K].VALVTASTDGIGFAIAR.[R]		5	1	A0A2I3BPY3	A0A2I3BPY3 [25-41]		Dehydrogenase/reductase SDR family member 4 (Fragment) OS=Mus musculus OX=10090 GN=Dhrs4 PE=1 SV=1	0	8123.59		High	Not Found
High	[K].FLEESVSMSPEER.[A]	1xPhospho [S]	3	1	A0A2I3BQ39	A0A2I3BQ39 [93-105]		Ubiquitin carboxyl-terminal hydrolase (Fragment) OS=Mus musculus OX=10090 GN=Uchl3 PE=1 SV=1	0	11319.1	9500.82	Peak Found	High
High	[K].LVFFAEDVGSNK.[G]		4	2	A0A2I3BQZ9	A0A2I3BQZ9 [669-680]		Amyloid-beta A4 protein OS=Mus musculus OX=10090 GN=App PE=1 SV=1	0	101609	7105.3	High	High
High	[R].TLDGDPVAVEALLQDVFGIVVDEAILK.[G-]		13	1	A0A2R8VHJ2	A0A2R8VHJ2 [9-35]		Cysteine sulfinic acid decarboxylase (Fragment) OS=Mus musculus OX=10090 GN=Csad PE=1 SV=1	0	48817.3		High	Not Found
High	[K].QFAEENGLLFLEASAK.[T]		3	1	A0A2R8VHW9	A0A2R8VHW9 [67-82]		Ras-related protein Rab-14 (Fragment) OS=Mus musculus OX=10090 GN=Rab14 PE=1 SV=1	0	15013.1		High	Not Found
High	[R].VVSSTSEEEEAFTEK.[F]	1xPhospho [T/S]	4	1	A0A2R8VI09	A0A2R8VI09 [130-144]		Oxidation resistance protein 1 (Fragment) OS=Mus musculus OX=10090 GN=Oxr1 PE=1 SV=1	0	225770	193600	High	Peak Found
High	[K].TQTYPTDWSDDESNNPFSSTDANGDSNPFDEDTTSGTEVR.[V]	1xPhospho [T/S/Y]	3	2	A0A2R8W6S4	A0A2R8W6S4 [177-216]		Protein kinase C and casein kinase substrate in neurons protein 2 (Fragment) OS=Mus musculus OX=10090 GN=Pacsin2 PE=1 SV=1	0			High	High
High	[K].QAAFGGSGPR.[A]		3	1	A0A2R8W710	A0A2R8W710 [286-295]		ATP-dependent DNA helicase Q4 OS=Mus musculus OX=10090 GN=Recql4 PE=1 SV=1	0	12147	13661.3	Peak Found	High
High	[K].SVSESHTPCPSESTGDTVPLQR.[S]	1xCarbamidomethyl [C9]; 1xPhospho [S3(98.8)]	2	2	A0A2R8W718	A0A2R8W718 [106-127]	A0A2R8W718 1xPhospho [S108(98.8)]	TBC1 domain family member 22A (Fragment) OS=Mus musculus OX=10090 GN=Tbc1d22a PE=1 SV=1	0	319007	184222	High	High
High	[R].SEIPPALISLGEGLITAGAQLVELDLSDNAFGPDGVR.[G]		3	1	A0A2R8W753	A0A2R8W753 [94-130]		Ran GTPase-activating protein 1 (Fragment) OS=Mus musculus OX=10090 GN=Rangap1 PE=1 SV=1	0	36143.4		High	Not Found
High	[R].DSSTCPGDYVLSVSENSR.[V]	1xCarbamidomethyl [C5]; 1xPhospho [S3(80.5)]	3	1	A0A338P675	A0A338P675 [40-57]	A0A338P675 1xPhospho [S42(80.5)]	Crk-like protein (Fragment) OS=Mus musculus OX=10090 GN=Crkl PE=1 SV=1	0	30553.2	25358.6	High	Peak Found
High	[R].AGSPQLDDIR.[V]	1xPhospho [S3(100)]	2	2	A0A338P6D9	A0A338P6D9 [124-133]	A0A338P6D9 1xPhospho [S126(100)]	Translation initiation factor eIF-2B subunit epsilon (Fragment) OS=Mus musculus OX=10090 GN=Eif2b5 PE=1 SV=1	0	2.20847e+06	1.92244e+06	High	High
High	[-].MSESGSKSSQPLASK.[Q]	1xMet-loss+Acetyl [N-Term]; 1xPhospho [S4(77.7)]	7	2	A0A338P6E8	A0A338P6E8 [1-15]	A0A338P6E8 1xMet-loss+Acetyl [N-Term]; 1xPhospho [S4(77.7)]	High mobility group protein HMG-I/HMG-Y OS=Mus musculus OX=10090 GN=Hmga1 PE=1 SV=1	1	72243.8	62155.8	High	High
High	[K].KLEKEEEEGISQESSEEEQ.[-]	2xPhospho [S11(99.1); S15(99.9)]	2	15	A0A338P6E8	A0A338P6E8 [93-111]	A0A338P6E8 2xPhospho [S103(99.1); S107(99.9)]	High mobility group protein HMG-I/HMG-Y OS=Mus musculus OX=10090 GN=Hmga1 PE=1 SV=1	2	6.48338e+06	3.36625e+06	High	High
High	[K].KLEKEEEEGISQESSEEEQ.[-]	1xPhospho [S15(86.8)]	2	3	A0A338P6E8	A0A338P6E8 [93-111]	A0A338P6E8 1xPhospho [S107(86.8)]	High mobility group protein HMG-I/HMG-Y OS=Mus musculus OX=10090 GN=Hmga1 PE=1 SV=1	2	550892	701534	High	High
High	[-].MAGILFEDIFDVK.[D]	1xMet-loss+Acetyl [N-Term]	2	1	A0A338P6M3	A0A338P6M3 [1-13]	A0A338P6M3 1xMet-loss+Acetyl [N-Term]	DNA-directed RNA polymerases I, II, and III subunit RPABC3 OS=Mus musculus OX=10090 GN=Polr2h PE=4 SV=1	0	62549.4	7070.32	High	Peak Found
High	[K].SSPSTGSLDSGNESK.[E]	1xPhospho [S/T]	3	2	A0A338P6P6	A0A338P6P6 [378-392]		Arf-GAP with coiled-coil, ANK repeat and PH domain-containing protein 2 OS=Mus musculus OX=10090 GN=Acap2 PE=1 SV=1	0	66438.7	69321.2	High	Peak Found
High	[R].HFYWYLTNEGIQYLR.[D]		5	1	A0A338P731	A0A338P731 [66-80]		40S ribosomal protein S10 (Fragment) OS=Mus musculus OX=10090 GN=Rps10 PE=1 SV=1	0	18845	4367.92	High	Peak Found
High	[K].TDQVIQSLIALVNDPQPEHPLR.[A]		3	1	A0A338P786	A0A338P786 [101-122]		Ubiquitin-conjugating enzyme E2 L3 (Fragment) OS=Mus musculus OX=10090 GN=Ube2l3 PE=1 SV=1	0	322395	42166.2	High	Peak Found
High	[R].NIQVDEANLLTWQGLIVPDNPPYDK.[G]		3	2	A0A338P786	A0A338P786 [24-48]		Ubiquitin-conjugating enzyme E2 L3 (Fragment) OS=Mus musculus OX=10090 GN=Ube2l3 PE=1 SV=1	0	2.4867e+06	385748	High	High
High	[-].MEDFQASEETAFVVDEVSSIVK.[E]	1xAcetyl [N-Term]	2	2	A0A338P7B7	A0A338P7B7 [1-22]	A0A338P7B7 1xAcetyl [N-Term]	Dynein light chain Tctex-type 1A OS=Mus musculus OX=10090 GN=Dynlt1a PE=1 SV=1	0	98737.8		High	Not Found
High	[-].MSLGGVSEASR.[A]	1xMet-loss+Acetyl [N-Term]; 1xPhospho [S2(84)]	4	1	A0A384DV91	A0A384DV91 [1-11]	A0A384DV91 1xMet-loss+Acetyl [N-Term]; 1xPhospho [S2(84)]	Stefin-1 OS=Mus musculus OX=10090 GN=Stfa1 PE=3 SV=1	0			Not Found	High
High	[K].QADVADQQTTELPAENGETENQSPASEEEKEAK.[S]	1xPhospho [S26(95.8)]	2	2	A0A3B2W3M7	A0A3B2W3M7 [52-84]	A0A3B2W3M7 1xPhospho [S77(95.8)]	Non-histone chromosomal protein HMG-14 OS=Mus musculus OX=10090 GN=Hmgn1 PE=1 SV=1	1	218467	179646	Peak Found	High
High	[K].QADVADQQTTELPAENGETENQSPASEEEKEAK.[S]	2xPhospho [S23(92.3); S26(99.9)]	2	1	A0A3B2W3M7	A0A3B2W3M7 [52-84]	A0A3B2W3M7 2xPhospho [S74(92.3); S77(99.9)]	Non-histone chromosomal protein HMG-14 OS=Mus musculus OX=10090 GN=Hmgn1 PE=1 SV=1	1	96047.6	58877.6	High	Peak Found
High	[R].SESLSNCSIGK.[K]	1xCarbamidomethyl [C7]; 1xPhospho [S3(96.1)]	4	2	A0A3B2W7H4	A0A3B2W7H4 [104-114]	A0A3B2W7H4 1xPhospho [S106(96.1)]	Ankyrin repeat and SAM domain containing 1 OS=Mus musculus OX=10090 GN=Anks1 PE=1 SV=1	0	60124.7	44248.4	High	High
High	[K].SPSFASEWDEIEK.[I]	1xPhospho [S3(95.2)]	4	1	A0A3B2W7H4	A0A3B2W7H4 [120-132]	A0A3B2W7H4 1xPhospho [S122(95.2)]	Ankyrin repeat and SAM domain containing 1 OS=Mus musculus OX=10090 GN=Anks1 PE=1 SV=1	0	153405	100653	High	Peak Found
High	[K].SVDLDAFVAR.[N]	1xPhospho [S1(100)]	2	2	A0A3B2W812	A0A3B2W812 [353-362]	A0A3B2W812 1xPhospho [S353(100)]	CD2-associated protein OS=Mus musculus OX=10090 GN=Cd2ap PE=1 SV=1	0	58170.3	46734.3	High	High
High	[K].AGWSLEDVDLFEINEAFAAVSAAIAK.[E]		3	1	A0A3B2WAL8	A0A3B2WAL8 [260-285]		Acetyl-CoA acetyltransferase, cytosolic OS=Mus musculus OX=10090 GN=Acat2 PE=1 SV=1	0	444572	54047.8	High	Peak Found
High	[R].TGDSMEASGFTK.[T]	1xPhospho [S4(85.9)]	4	1	A0A3B2WB50	A0A3B2WB50 [552-563]	A0A3B2WB50 1xPhospho [S555(85.9)]	EMILIN-2 OS=Mus musculus OX=10090 GN=Emilin2 PE=1 SV=1	0	138804		High	Not Found
High	[R].LAHTDFDEMYSTFSGVFLYPFLSHL.[-]		4	1	A0A3B2WB50	A0A3B2WB50 [969-993]		EMILIN-2 OS=Mus musculus OX=10090 GN=Emilin2 PE=1 SV=1	0	175527		High	Not Found
High	[R].DASPPPAFKPEPPK.[A]	1xPhospho [S3(100)]	3	2	A0A3B2WBH9	A0A3B2WBH9 [966-979]	A0A3B2WBH9 1xPhospho [S968(100)]	Tight junction protein ZO-2 OS=Mus musculus OX=10090 GN=Tjp2 PE=1 SV=1	0	32855.7	21908	High	High
High	[R].SVSPQTLEAYIR.[W]	1xPhospho [S3(97.1)]	3	2	A0A3B2WC92	A0A3B2WC92 [560-571]	A0A3B2WC92 1xPhospho [S562(97.1)]	Spastin OS=Mus musculus OX=10090 GN=Spast PE=1 SV=1	0	14825.2	10101.9	High	High
High	[K].LLQGSPEQGEAVTR.[T]	1xPhospho [S5(99.8)]	2	2	A0A3Q4EBZ8	A0A3Q4EBZ8 [168-181]	A0A3Q4EBZ8 1xPhospho [S172(99.8)]	THUMP domain-containing protein 2 OS=Mus musculus OX=10090 GN=Thumpd2 PE=1 SV=1	0	26317.6	30119.3	High	High
High	[R].SLGQNPTEAELQDMINEVDADGNGTIDFPEFLTMMAR.[K]		3	1	A0A3Q4EHJ0	A0A3Q4EHJ0 [3-39]		Calmodulin-1 OS=Mus musculus OX=10090 GN=Calm1 PE=1 SV=1	0	134807		High	Not Found
High	[K].DQADLLALGTAVGSILLYSTVR.[G]		2	1	A0A3Q4EHN7	A0A3Q4EHN7 [92-113]		WD repeat-containing protein 43 OS=Mus musculus OX=10090 GN=Wdr43 PE=1 SV=1	0	20380		High	Not Found
High	[K].TPQVSPMPR.[I]	1xOxidation [M7]	2	1	A0A3Q4EI48	A0A3Q4EI48 [405-413]		Zinc finger protein 521 (Fragment) OS=Mus musculus OX=10090 GN=Zfp521 PE=1 SV=1	0	72223.9	54144.1	High	Peak Found
High	[K].EDLESMDKEVDDILGEGSDDSDIEK.[K]	1xPhospho [S21(99.4)]	3	1	A0A494B8Z5	A0A494B8Z5 [38-62]	A0A494B8Z5 1xPhospho [S58(99.4)]	RNA polymerase II subunit A C-terminal domain phosphatase OS=Mus musculus OX=10090 GN=Ctdp1 PE=1 SV=1	1	59770.1	68040.6	Peak Found	High
High	[K].LDLQWVQILSEGWATPLK.[G]		3	1	A0A494B923	A0A494B923 [251-268]		Bifunctional 3'-phosphoadenosine 5'-phosphosulfate synthase 2 OS=Mus musculus OX=10090 GN=Papss2 PE=1 SV=1	0	42604.6		High	Not Found
High	[R].LNLEEWILEQLTR.[L]		4	1	A0A494B933	A0A494B933 [47-59]		Protein phosphatase 1 regulatory subunit 14B (Fragment) OS=Mus musculus OX=10090 GN=Ppp1r14b PE=1 SV=1	0	102819		High	Not Found
High	[R].TGIIVTTSEAVLLQLVADKDHPK.[F]		2	1	A0A494B952	A0A494B952 [214-236]		Isochorismatase domain-containing protein 1 OS=Mus musculus OX=10090 GN=Isoc1 PE=1 SV=1	1			High	Not Found
High	[K].IGLGTDVAGGYSYSMLDAIR.[R]		3	1	A0A494B982	A0A494B982 [300-319]		Guanine deaminase OS=Mus musculus OX=10090 GN=Gda PE=3 SV=1	0			High	Not Found
High	[R].LATLGGSQALGLDSEIGNFEVGKEFDALLINPR.[A]		3	1	A0A494B982	A0A494B982 [346-378]		Guanine deaminase OS=Mus musculus OX=10090 GN=Gda PE=3 SV=1	1	206151		High	Not Found
High	[R].SSLGQSASETEEDTVSISK.[K]	2xPhospho [S6(100); S8(100)]	2	3	A0A494B9S9	A0A494B9S9 [284-302]	A0A494B9S9 2xPhospho [S289(100); S291(100)]	Splicing factor 3b, subunit 2 (Fragment) OS=Mus musculus OX=10090 GN=Sf3b2 PE=1 SV=1	0	61708.8	50555.6	High	High
High	[R].SSLGQSASETEEDTVSISK.[K]	1xPhospho [S8(97.6)]	2	3	A0A494B9S9	A0A494B9S9 [284-302]	A0A494B9S9 1xPhospho [S291(97.6)]	Splicing factor 3b, subunit 2 (Fragment) OS=Mus musculus OX=10090 GN=Sf3b2 PE=1 SV=1	0	310168	254852	High	High
High	[R].NVLLSAGCDNVVLIWNVGTAEELYR.[L]	1xCarbamidomethyl [C8]	3	2	A0A494B9Y4	A0A494B9Y4 [146-170]		Coronin (Fragment) OS=Mus musculus OX=10090 GN=Coro1b PE=1 SV=1	0	104948	80048.6	High	High
High	[R].AIFLADGK.[V]		2	1	A0A494B9Y4	A0A494B9Y4 [226-233]		Coronin (Fragment) OS=Mus musculus OX=10090 GN=Coro1b PE=1 SV=1	0	18414.6	18905.1	High	Peak Found
High	[K].FLAVIVEASGGGAFMVLPLNK.[T]		4	2	A0A494B9Y4	A0A494B9Y4 [47-67]		Coronin (Fragment) OS=Mus musculus OX=10090 GN=Coro1b PE=1 SV=1	0	98008.5	73806	High	High
High	[R].SGVAVPTSPK.[G]	1xPhospho [S8(93.5)]	2	2	A0A494BA05	A0A494BA05 [87-96]	A0A494BA05 1xPhospho [S94(93.5)]	Programmed cell death protein 4 OS=Mus musculus OX=10090 GN=Pdcd4 PE=1 SV=1	0	584278	486035	High	High
High	[R].SGVAVPTSPKGR.[L]	1xPhospho [S8(88)]	2	1	A0A494BA05	A0A494BA05 [87-98]	A0A494BA05 1xPhospho [S94(88)]	Programmed cell death protein 4 OS=Mus musculus OX=10090 GN=Pdcd4 PE=1 SV=1	1	46133.8	28434.4	High	Peak Found
High	[K].VWINTSDIILIGLR.[D]		13	2	A0A494BB95	A0A494BB95 [179-192]		Eukaryotic translation initiation factor 1A OS=Mus musculus OX=10090 GN=Eif1a PE=1 SV=1	0	170902	105206	High	High
High	[K].GELAPELGEDTQSLSQEETELELLR.[Q]	1xPhospho [S/T]	2	1	A0A494BBE1	A0A494BBE1 [26-50]		DNA polymerase delta subunit 4 OS=Mus musculus OX=10090 GN=Pold4 PE=4 SV=1	0	55612.8	45769.6	Peak Found	High
High	[K].QHLENDPGSNEDADIPK.[G]	1xPhospho [S9(100)]	4	1	A0A498WGD8	A0A498WGD8 [105-121]	A0A498WGD8 1xPhospho [S113(100)]	Thioredoxin-like protein 1 OS=Mus musculus OX=10090 GN=Txnl1 PE=1 SV=1	0			Not Found	High
High	[R].SWDSEEILEGYK.[R]	1xPhospho [S4(85.1)]	4	1	A0A498WGK2	A0A498WGK2 [489-500]	A0A498WGK2 1xPhospho [S492(85.1)]	Asparaginyl-tRNA synthetase OS=Mus musculus OX=10090 GN=Nars PE=4 SV=1	0	9133.83	9808.68	Peak Found	High
High	[R].FLSWILNR.[Y]		3	1	A0A498WGK2	A0A498WGK2 [533-540]		Asparaginyl-tRNA synthetase OS=Mus musculus OX=10090 GN=Nars PE=4 SV=1	0			High	Not Found
High	[R].RSSLVITTK.[IL]	1xPhospho [S/T]	12	1	A0A571BF54	A0A571BF54 [141-149]		Voltage-gated potassium channel subunit beta-2 OS=Mus musculus OX=10090 GN=Kcnab2 PE=1 SV=1	1	91549.9	85322.5	High	Peak Found
High	[R].SSLVITTK.[IL]	1xPhospho [S/T]	12	1	A0A571BF54	A0A571BF54 [142-149]		Voltage-gated potassium channel subunit beta-2 OS=Mus musculus OX=10090 GN=Kcnab2 PE=1 SV=1	0	23495.1	19473.7	High	Peak Found
High	[R].SGLSLEELR.[I]	1xPhospho [S4(98.5)]	2	1	A0A5F8MPF0	A0A5F8MPF0 [1054-1062]	A0A5F8MPF0 1xPhospho [S1057(98.5)]	Kinesin-like protein KIF1B OS=Mus musculus OX=10090 GN=Kif1b PE=4 SV=1	0	37879.9	23589.7	High	Peak Found
High	[K].MADTGSPGMQR.[R]	1xPhospho [S6(99.9)]	3	2	A0A5F8MPF0	A0A5F8MPF0 [1516-1526]	A0A5F8MPF0 1xPhospho [S1521(99.9)]	Kinesin-like protein KIF1B OS=Mus musculus OX=10090 GN=Kif1b PE=4 SV=1	0	27621.9	22151	High	High
High	[R].GDSLILEHQWELEK.[L]	1xPhospho [S3(100)]	3	2	A0A5F8MPF0	A0A5F8MPF0 [1552-1565]	A0A5F8MPF0 1xPhospho [S1554(100)]	Kinesin-like protein KIF1B OS=Mus musculus OX=10090 GN=Kif1b PE=4 SV=1	0	28661.2	15696.7	High	High
High	[R].ANSLGVLNAGGK.[A]	1xPhospho [S3(100)]	1	2	A0A5F8MPZ2	A0A5F8MPZ2 [598-609]	A0A5F8MPZ2 1xPhospho [S600(100)]	Kinesin light chain 1 OS=Mus musculus OX=10090 GN=Klc1 PE=4 SV=1	0	40858	30206.9	High	High
High	[R].TLSASHTDLAH.[-]	1xPhospho [S5(97.8)]	1	1	A0A5F8MPZ2	A0A5F8MPZ2 [627-637]	A0A5F8MPZ2 1xPhospho [S631(97.8)]	Kinesin light chain 1 OS=Mus musculus OX=10090 GN=Klc1 PE=4 SV=1	0	37063.6	28340.5	Peak Found	High
High	[R].NVPGLAAPSSPTQK.[E]	1xPhospho [T12(88.7)]	3	2	A0A5F8MQ25	A0A5F8MQ25 [688-701]	A0A5F8MQ25 1xPhospho [T699(88.7)]	Serine/threonine-protein phosphatase 6 regulatory subunit 2 OS=Mus musculus OX=10090 GN=Ppp6r2 PE=4 SV=1	0	34308.7	30904.7	High	High
High	[R].QSEQPVKPVGPVMDDAAPEDSASPVSQQR.[A]	1xPhospho [S]	2	1	A0A5H1ZRL7	A0A5H1ZRL7 [1074-1102]		Transformation related protein 53 binding protein 1 OS=Mus musculus OX=10090 GN=Trp53bp1 PE=4 SV=1	0	20797.1	17786.1	Peak Found	High
High	[R].SEDRPSSPQVSVAAVETK.[E]	1xPhospho [S6(80.1)]	3	1	A0A5H1ZRL7	A0A5H1ZRL7 [262-279]	A0A5H1ZRL7 1xPhospho [S267(80.1)]	Transformation related protein 53 binding protein 1 OS=Mus musculus OX=10090 GN=Trp53bp1 PE=4 SV=1	0	77755.6	59939	High	Peak Found
High	[R].STPFIVPSSPTEQGGR.[K]	1xPhospho [T11(99.9)]	3	1	A0A5H1ZRL7	A0A5H1ZRL7 [374-389]	A0A5H1ZRL7 1xPhospho [T384(99.9)]	Transformation related protein 53 binding protein 1 OS=Mus musculus OX=10090 GN=Trp53bp1 PE=4 SV=1	0	237352	221213	High	Peak Found
High	[R].TEEDRENTQIDDTEPLSPVSNSK.[L]	1xPhospho [S17(79.1)]	3	1	A0A5H1ZRL7	A0A5H1ZRL7 [536-558]	A0A5H1ZRL7 1xPhospho [S552(79.1)]	Transformation related protein 53 binding protein 1 OS=Mus musculus OX=10090 GN=Trp53bp1 PE=4 SV=1	1	138635	90966.8	High	Peak Found
High	[K].DAVTEDSPQPPLPSVR.[D]	1xPhospho [S7(97.4)]	4	1	A0A5H1ZRL7	A0A5H1ZRL7 [816-831]	A0A5H1ZRL7 1xPhospho [S822(97.4)]	Transformation related protein 53 binding protein 1 OS=Mus musculus OX=10090 GN=Trp53bp1 PE=4 SV=1	0	15266.5	13700.9	Peak Found	High
High	[R].DSLESAPSLSPVK.[E]	1xPhospho [S8(97.1)]	2	1	A0A5H1ZRN0	A0A5H1ZRN0 [405-417]	A0A5H1ZRN0 1xPhospho [S412(97.1)]	Centrosome-associated protein 350 (Fragment) OS=Mus musculus OX=10090 GN=Cep350 PE=4 SV=1	0	13483.4	11697.4	High	Peak Found
High	[R].LGVVTFQAFIDFMSR.[E]		2	2	A1BN54	A1BN54 [799-813]		Alpha actinin 1a OS=Mus musculus OX=10090 GN=Actn1 PE=1 SV=1	0	125921	66885.7	High	High
High	[R].QEQLSPK.[K]	1xPhospho [S5(100)]	3	1	A2A468	A2A468 [715-721]	A2A468 1xPhospho [S719(100)]	Nuclear receptor coactivator OS=Mus musculus OX=10090 GN=Ncoa3 PE=1 SV=1	0	27085.5	29466.5	Peak Found	High
High	[K].GFSVVADTPELQR.[I]		7	2	A2A6H0	A2A6H0 [61-73]		LIM and SH3 domain protein 1 (Fragment) OS=Mus musculus OX=10090 GN=Lasp1 PE=1 SV=1	0	13143.5	9482.27	High	High
High	[K].YLQEEVNINR.[K]		3	1	A2A6U5	A2A6U5 [158-167]		Septin 9 (Fragment) OS=Mus musculus OX=10090 GN=Sept9 PE=1 SV=1	0	21921.5	14260.4	Peak Found	High
High	[R].RTASPPVLPK.[I]	1xPhospho [S4(99.9)]	1	1	A2A7B5	A2A7B5 [635-644]	A2A7B5 1xPhospho [S638(99.9)]	PR domain-containing 2, with ZNF domain OS=Mus musculus OX=10090 GN=Prdm2 PE=1 SV=1	1	13842.3	12748.2	High	Peak Found
High	[R].TASPPVLPK.[I]	1xPhospho [S3(100)]	1	2	A2A7B5	A2A7B5 [636-644]	A2A7B5 1xPhospho [S638(100)]	PR domain-containing 2, with ZNF domain OS=Mus musculus OX=10090 GN=Prdm2 PE=1 SV=1	0	90713.1	70561.3	High	High
High	[R].TSSPPSSPQHSPALR.[D]	1xPhospho [T/S]	1	1	A2A7B5	A2A7B5 [733-747]		PR domain-containing 2, with ZNF domain OS=Mus musculus OX=10090 GN=Prdm2 PE=1 SV=1	0	62698.9	38921.1	High	Peak Found
High	[R].GSPSGGSTAETSDTASIR.[S]	1xPhospho [S2(100)]	1	2	A2A7S8	A2A7S8 [401-418]	A2A7S8 1xPhospho [S402(100)]	Uncharacterized protein KIAA1522 OS=Mus musculus OX=10090 GN=Kiaa1522 PE=1 SV=1	0	39153.1	26645.8	High	High
High	[R].SLDGAAAAESTDR.[S]	1xPhospho [S1(100)]	7	2	A2A842	A2A842 [508-520]	A2A842 1xPhospho [S508(100)]	Protein 4.1 OS=Mus musculus OX=10090 GN=Epb41 PE=1 SV=1	0	76127.4	87359.1	High	High
High	[R].SPSGSAFGSQENLR.[W]	1xPhospho [S3(82.2)]	5	1	A2A9M4	A2A9M4 [1420-1433]	A2A9M4 1xPhospho [S1422(82.2)]	Dedicator of cytokinesis protein 7 OS=Mus musculus OX=10090 GN=Dock7 PE=1 SV=2	0			Not Found	High
High	[R].SRSLSNSNPDISGTPTSPDDEVR.[S]	2xPhospho [S/T]	8	1	A2A9M4	A2A9M4 [894-916]		Dedicator of cytokinesis protein 7 OS=Mus musculus OX=10090 GN=Dock7 PE=1 SV=2	1	46723.4	30152.1	High	Peak Found
High	[R].SLSNSNPDISGTPTSPDDEVR.[S]	1xPhospho [T/S]	8	2	A2A9M4	A2A9M4 [896-916]		Dedicator of cytokinesis protein 7 OS=Mus musculus OX=10090 GN=Dock7 PE=1 SV=2	0	136738	99368.7	High	Peak Found
High	[R].DLLSDLQDISDSER.[K]	1xPhospho [S10(99.4)]	2	3	A2A9P6	A2A9P6 [227-240]	A2A9P6 1xPhospho [S236(99.4)]	Cyclin-dependent kinase 11B OS=Mus musculus OX=10090 GN=Cdk11b PE=1 SV=1	0	856557	782558	High	High
High	[R].EYGSPLK.[A]	1xPhospho [S4(100)]	2	2	A2A9P6	A2A9P6 [541-547]	A2A9P6 1xPhospho [S544(100)]	Cyclin-dependent kinase 11B OS=Mus musculus OX=10090 GN=Cdk11b PE=1 SV=1	0	63272.2	62073.8	High	High
High	[R].ILGSASPEEEQEKPILDRPTR.[I]	1xPhospho [S6(75.4)]	2	1	A2AA85	A2AA85 [96-116]	A2AA85 1xPhospho [S101(75.4)]	SUZ domain-containing protein 1 (Fragment) OS=Mus musculus OX=10090 GN=Szrd1 PE=1 SV=1	0	37584.1	24776.6	Peak Found	High
High	[R].QNAASPSLSPGGLESDLSR.[V]	1xPhospho [S18(99.4)]	1	1	A2AB59	A2AB59 [628-646]	A2AB59 1xPhospho [S645(99.4)]	Rho GTPase-activating protein 27 OS=Mus musculus OX=10090 GN=Arhgap27 PE=1 SV=1	0	11751.4	9208.86	Peak Found	High
High	[K].EAAADTSGREEPPTPKSPPK.[A]	1xPhospho [S17(100)]	4	2	A2AB60	A2AB60 [1005-1024]	A2AB60 1xPhospho [S1021(100)]	Formin-like protein 1 OS=Mus musculus OX=10090 GN=Fmnl1 PE=1 SV=1	2	141505	110037	High	High
High	[K].TVFDEAIR.[A]		6	1	A2AC13	A2AC13 [160-167]		Ras-related C3 botulinum toxin substrate 3 (Fragment) OS=Mus musculus OX=10090 GN=Rac3 PE=1 SV=1	0	48775.9	56064.6	Peak Found	High
High	[K].FAEVENVVDTILFLLSNR.[S]		2	2	A2AC16	A2AC16 [201-218]		L-xylulose reductase OS=Mus musculus OX=10090 GN=Dcxr PE=1 SV=1	0	98088.6	11596	High	High
High	[R].DLSEVTFSLQVDADFELHNFR.[A]		1	1	A2ADY9	A2ADY9 [11-31]		Protein DDI1 homolog 2 OS=Mus musculus OX=10090 GN=Ddi2 PE=1 SV=1	0		38771.3	Not Found	High
High	[R].QISQDVKLEPDILLR.[A]	1xPhospho [S3(100)]	2	2	A2AE27	A2AE27 [111-125]	A2AE27 1xPhospho [S113(100)]	AMP deaminase OS=Mus musculus OX=10090 GN=Ampd2 PE=1 SV=1	1	57297.6	36962.2	High	High
High	[K].QDFLKTDSDSDLQLYK.[E]	1xPhospho [S8(95.7)]	2	1	A2AE27	A2AE27 [128-143]	A2AE27 1xPhospho [S135(95.7)]	AMP deaminase OS=Mus musculus OX=10090 GN=Ampd2 PE=1 SV=1	1	12358.9	14113.2	High	Peak Found
High	[K].TDSDSDLQLYK.[E]	1xPhospho [S/T/Y]	2	1	A2AE27	A2AE27 [133-143]		AMP deaminase OS=Mus musculus OX=10090 GN=Ampd2 PE=1 SV=1	0	154703	162509	High	Peak Found
High	[K].TDSDSDLQLYKEQGEGQGDR.[G]	1xPhospho [S/T/Y]	2	1	A2AE27	A2AE27 [133-152]		AMP deaminase OS=Mus musculus OX=10090 GN=Ampd2 PE=1 SV=1	1			High	Not Found
High	[R].AASDPLLSSVSPAVSK.[A]	1xPhospho [S3(100)]	3	2	A2AEW0	A2AEW0 [508-523]	A2AEW0 1xPhospho [S510(100)]	Transcription factor E3 OS=Mus musculus OX=10090 GN=Tfe3 PE=1 SV=1	0	85174.3	50008.9	High	High
High	[R].EDSRGSLIPEGATGFPDPGSTSENTR.[Q]	1xPhospho [S3(77.6)]	2	2	A2AF67	A2AF67 [1064-1089]	A2AF67 1xPhospho [S1066(77.6)]	Dedicator of cytokinesis protein 11 OS=Mus musculus OX=10090 GN=Dock11 PE=1 SV=1	1	144943	78202.3	High	High
High	[R].APSQPPSPTEER.[N]	1xPhospho [S7(90.4)]	2	1	A2AFQ9	A2AFQ9 [1407-1418]	A2AFQ9 1xPhospho [S1413(90.4)]	Gem-associated protein 5 OS=Mus musculus OX=10090 GN=Gemin5 PE=1 SV=1	0	19632.9	19002.4	High	Peak Found
High	[R].ATLSDSEIETNSATSAIFGK.[A]	1xPhospho [T/S]	13	1	A2AGQ2	A2AGQ2 [1178-1197]		MAP kinase-activating death domain protein OS=Mus musculus OX=10090 GN=Madd PE=1 SV=1	0			High	Not Found
High	[K].SDQTNILSALLVLLQDSLLATASSPK.[F]		4	1	A2AGT5	A2AGT5 [1679-1704]		Cytoskeleton-associated protein 5 OS=Mus musculus OX=10090 GN=Ckap5 PE=1 SV=1	0	8526.62		High	Not Found
High	[K].ILVQQTLNILQQLAVAMGANIR.[Q]		4	1	A2AGT5	A2AGT5 [915-936]		Cytoskeleton-associated protein 5 OS=Mus musculus OX=10090 GN=Ckap5 PE=1 SV=1	0	41625.9		High	Not Found
High	[R].SVENLLDSK.[T]	1xPhospho [S1(100)]	2	2	A2AI52	A2AI52 [164-172]	A2AI52 1xPhospho [S164(100)]	Ubiquitin carboxyl-terminal hydrolase 8 OS=Mus musculus OX=10090 GN=Usp8 PE=1 SV=1	0	20596.1	17318.7	High	High
High	[R].SYSSPDITQALQEEEK.[R]	1xPhospho [S3(97.3)]	2	2	A2AI52	A2AI52 [689-704]	A2AI52 1xPhospho [S691(97.3)]	Ubiquitin carboxyl-terminal hydrolase 8 OS=Mus musculus OX=10090 GN=Usp8 PE=1 SV=1	0	569127	444935	High	High
High	[R].SYSSPDITQALQEEEKR.[R]	1xPhospho [S3(99)]	2	4	A2AI52	A2AI52 [689-705]	A2AI52 1xPhospho [S691(99)]	Ubiquitin carboxyl-terminal hydrolase 8 OS=Mus musculus OX=10090 GN=Usp8 PE=1 SV=1	1	744202	608688	High	High
High	[K].ALVVPEPEPDSDSNQER.[K]	1xPhospho [S13(99.9)]	3	1	A2AIR0	A2AIR0 [126-142]	A2AIR0 1xPhospho [S138(99.9)]	E3 ubiquitin protein ligase (Fragment) OS=Mus musculus OX=10090 GN=Rnf20 PE=1 SV=1	0	44047.9	30202.3	High	Peak Found
High	[R].SFLSEPSSPGR.[S]	1xPhospho [S]	2	2	A2AIV2	A2AIV2 [1571-1581]		Protein virilizer homolog OS=Mus musculus OX=10090 GN=Virma PE=1 SV=1	0	755895	672738	High	High
High	[-].MSDYENDDECWSTLESFR.[V]	1xCarbamidomethyl [C10]; 1xMet-loss+Acetyl [N-Term]; 1xPhospho [S/T/Y]	1	1	A2AIV8	A2AIV8 [1-18]	A2AIV8 1xMet-loss+Acetyl [N-Term]	Caspase recruitment domain-containing protein 9 OS=Mus musculus OX=10090 GN=Card9 PE=1 SV=1	0			Not Found	High
High	[K].QQQLDMLILSSDLEDSSPR.[N]	1xOxidation [M6]; 1xPhospho [S]	1	1	A2AIV8	A2AIV8 [415-433]		Caspase recruitment domain-containing protein 9 OS=Mus musculus OX=10090 GN=Card9 PE=1 SV=1	0	57627.7	50776	Peak Found	High
High	[K].QQQLDMLILSSDLEDSSPR.[N]	1xPhospho [S16(90.1)]	1	2	A2AIV8	A2AIV8 [415-433]	A2AIV8 1xPhospho [S430(90.1)]	Caspase recruitment domain-containing protein 9 OS=Mus musculus OX=10090 GN=Card9 PE=1 SV=1	0	148277	110389	High	High
High	[R].SSQPSPTTVPASDSPPAK.[Q]	1xPhospho [S/T]	3	2	A2AJI1	A2AJI1 [114-131]		MAP7 domain-containing protein 1 OS=Mus musculus OX=10090 GN=Map7d1 PE=1 SV=1	0	90084.6	88706.6	High	Peak Found
High	[R].SSQPSPTTVPASDSPPAKQDVK.[K]	1xPhospho [S14(99.3)]	3	2	A2AJI1	A2AJI1 [114-135]	A2AJI1 1xPhospho [S127(99.3)]	MAP7 domain-containing protein 1 OS=Mus musculus OX=10090 GN=Map7d1 PE=1 SV=1	1	52303.9	26952.7	High	High
High	[R].QSSPQEEPTWK.[K]	1xPhospho [S3(98.9)]	2	2	A2AK42	A2AK42 [105-115]	A2AK42 1xPhospho [S107(98.9)]	Predicted gene 13691 OS=Mus musculus OX=10090 GN=Gm13697 PE=4 SV=1	0	46266.3	51302.1	High	High
High	[R].SESPPPLSEPK.[Q]	1xPhospho [S3(100)]	2	3	A2AKA9	A2AKA9 [260-270]	A2AKA9 1xPhospho [S262(100)]	Bromodomain-containing protein 3 (Fragment) OS=Mus musculus OX=10090 GN=Brd3 PE=1 SV=1	0	168411	111517	High	High
High	[K].LIPALLESLSVLEPQVLNYLSLR.[A]		2	1	A2ALV7	A2ALV7 [1291-1313]		Proteasome adapter and scaffold protein ECM29 (Fragment) OS=Mus musculus OX=10090 GN=Ecpas PE=1 SV=1	0	23115.8		High	Not Found
High	[R].ELAALFYSVVVSTVSGIELK.[S]		3	2	A2ALV7	A2ALV7 [706-725]		Proteasome adapter and scaffold protein ECM29 (Fragment) OS=Mus musculus OX=10090 GN=Ecpas PE=1 SV=1	0	67938.3	28142.7	High	High
High	[R].TSSPTSLPPLAR.[S]	1xPhospho [S3(99.9)]	6	4	A2AMI6	A2AMI6 [275-286]	A2AMI6 1xPhospho [S277(99.9)]	Eukaryotic translation initiation factor 4 gamma 3 OS=Mus musculus OX=10090 GN=Eif4g3 PE=1 SV=1	0	447373	357655	High	High
High	[R].SVQTFADK.[S]		1	1	A2AMW0	A2AMW0 [233-240]		F-actin-capping protein subunit beta OS=Mus musculus OX=10090 GN=Capzb PE=1 SV=1	0	34843.1	43020.9	Peak Found	High
High	[K].NDLVEALK.[R]		1	2	A2AMW0	A2AMW0 [248-255]		F-actin-capping protein subunit beta OS=Mus musculus OX=10090 GN=Capzb PE=1 SV=1	0	18075.7	19909.2	High	High
High	[R].HVTLPSSPR.[S]	1xPhospho [S6(83.6)]	2	4	A2AN08	A2AN08 [2710-2718]	A2AN08 1xPhospho [S2715(83.6)]	E3 ubiquitin-protein ligase UBR4 OS=Mus musculus OX=10090 GN=Ubr4 PE=1 SV=1	0	735871	448050	High	High
High	[K].GHAADVFEAYTQLLTEMVLR.[L]		2	1	A2AN08	A2AN08 [3144-3163]		E3 ubiquitin-protein ligase UBR4 OS=Mus musculus OX=10090 GN=Ubr4 PE=1 SV=1	0	85705.4	9998.42	High	Peak Found
High	[R].TGSTSSKEDDYESDAATIVQK.[C]	1xPhospho [T/S/Y]	1	1	A2AN08	A2AN08 [360-380]		E3 ubiquitin-protein ligase UBR4 OS=Mus musculus OX=10090 GN=Ubr4 PE=1 SV=1	1	97453.5	58961.5	High	Peak Found
High	[R].LLALEEATLSTDLQQGYALK.[S]		2	1	A2AN08	A2AN08 [4217-4236]		E3 ubiquitin-protein ligase UBR4 OS=Mus musculus OX=10090 GN=Ubr4 PE=1 SV=1	0			High	Not Found
High	[K].TFQEEFMPVETFSEFLDAAGLLSEITDPESFLK.[D]		1	1	A2AN08	A2AN08 [5141-5173]		E3 ubiquitin-protein ligase UBR4 OS=Mus musculus OX=10090 GN=Ubr4 PE=1 SV=1	0	37066.2		High	Not Found
High	[K].EELASDLEEMATSSAK.[R]	1xPhospho [S5(100)]	2	1	A2APD7	A2APD7 [225-240]	A2APD7 1xPhospho [S229(100)]	Nucleolar protein 56 (Fragment) OS=Mus musculus OX=10090 GN=Nop56 PE=1 SV=1	0	74112.1	88459.9	Peak Found	High
High	[K].SSPKEEVASEPEEAASPTTPK.[K]	1xPhospho [S9(100)]	2	2	A2APD7	A2APD7 [244-264]	A2APD7 1xPhospho [S252(100)]	Nucleolar protein 56 (Fragment) OS=Mus musculus OX=10090 GN=Nop56 PE=1 SV=1	1	60758.2	52514.6	High	High
High	[K].SSPKEEVASEPEEAASPTTPK.[K]	2xPhospho [S9(99.8); T/S]	2	1	A2APD7	A2APD7 [244-264]	A2APD7 2xPhospho [S252(99.8); T/S]	Nucleolar protein 56 (Fragment) OS=Mus musculus OX=10090 GN=Nop56 PE=1 SV=1	1	61790.7	45759.7	Peak Found	High
High	[K].EEVASEPEEAASPTTPK.[K]	1xPhospho [S5(100)]	2	3	A2APD7	A2APD7 [248-264]	A2APD7 1xPhospho [S252(100)]	Nucleolar protein 56 (Fragment) OS=Mus musculus OX=10090 GN=Nop56 PE=1 SV=1	0	100868	93924.3	High	High
High	[R].AMALGDSSPQTTEPVLR.[E]	1xPhospho [S8(92)]	2	2	A2APF7	A2APF7 [377-393]	A2APF7 1xPhospho [S384(92)]	Z-DNA-binding protein 1 OS=Mus musculus OX=10090 GN=Zbp1 PE=1 SV=1	0	95144.8	65445.6	High	High
High	[R].AMALGDSSPQTTEPVLR.[E]	1xOxidation [M2]; 1xPhospho [S8(81)]	2	7	A2APF7	A2APF7 [377-393]	A2APF7 1xPhospho [S384(81)]	Z-DNA-binding protein 1 OS=Mus musculus OX=10090 GN=Zbp1 PE=1 SV=1	0	269644	225865	High	High
High	[R].MLGAPEEADANEEGVR.[R]		2	2	A2APX3	A2APX3 [29-44]		Cystatin-C (Fragment) OS=Mus musculus OX=10090 GN=Cst3 PE=1 SV=1	0	31110.7	38215.5	High	High
High	[R].MLGAPEEADANEEGVR.[R]	1xOxidation [M1]	2	2	A2APX3	A2APX3 [29-44]		Cystatin-C (Fragment) OS=Mus musculus OX=10090 GN=Cst3 PE=1 SV=1	0	18023.8	21500.2	High	High
High	[R].MLGAPEEADANEEGVRR.[A]		2	2	A2APX3	A2APX3 [29-45]		Cystatin-C (Fragment) OS=Mus musculus OX=10090 GN=Cst3 PE=1 SV=1	1	36420.3	41765	High	High
High	[R].ALDFAVSEYNK.[G]		2	3	A2APX3	A2APX3 [46-56]		Cystatin-C (Fragment) OS=Mus musculus OX=10090 GN=Cst3 PE=1 SV=1	0	287324	352318	High	High
High	[R].KQLVAGVNYFLDVEMGR.[T]		2	26	A2APX3	A2APX3 [74-90]		Cystatin-C (Fragment) OS=Mus musculus OX=10090 GN=Cst3 PE=1 SV=1	1	33333.2	59957.6	High	High
High	[R].KQLVAGVNYFLDVEMGR.[T]	1xOxidation [M15]	2	1	A2APX3	A2APX3 [74-90]		Cystatin-C (Fragment) OS=Mus musculus OX=10090 GN=Cst3 PE=1 SV=1	1			Not Found	High
High	[K].QLVAGVNYFLDVEMGR.[T]		2	6	A2APX3	A2APX3 [75-90]		Cystatin-C (Fragment) OS=Mus musculus OX=10090 GN=Cst3 PE=1 SV=1	0	1.50669e+06	924508	High	High
High	[K].QLVAGVNYFLDVEMGR.[T]	1xOxidation [M14]	2	3	A2APX3	A2APX3 [75-90]		Cystatin-C (Fragment) OS=Mus musculus OX=10090 GN=Cst3 PE=1 SV=1	0	103921	118175	High	High
High	[R].VVIDSDTEDSGSDENLDQELLSLAK.[R]	1xPhospho [S12(96.9)]	1	2	A2AQ19	A2AQ19 [54-78]	A2AQ19 1xPhospho [S65(96.9)]	RNA polymerase-associated protein RTF1 homolog OS=Mus musculus OX=10090 GN=Rtf1 PE=1 SV=1	0	187305	102557	High	High
High	[R].VVIDSDTEDSGSDENLDQELLSLAK.[R]	2xPhospho [S5(89.3); S/T]	1	1	A2AQ19	A2AQ19 [54-78]	A2AQ19 2xPhospho [S58(89.3); S/T]	RNA polymerase-associated protein RTF1 homolog OS=Mus musculus OX=10090 GN=Rtf1 PE=1 SV=1	0	42825.7	31807.7	Peak Found	High
High	[R].AELGMNDSPSQSPPVK.[R]	1xOxidation [M5]; 1xPhospho [S12(85.7)]	4	7	A2AQN4	A2AQN4 [256-271]	A2AQN4 1xPhospho [S267(85.7)]	Acetyl-coenzyme A synthetase, cytoplasmic OS=Mus musculus OX=10090 GN=Acss2 PE=1 SV=1	0	91125.5	57822.6	High	High
High	[R].AELGMNDSPSQSPPVK.[R]	1xPhospho [S8(86.9)]	4	3	A2AQN4	A2AQN4 [256-271]	A2AQN4 1xPhospho [S263(86.9)]	Acetyl-coenzyme A synthetase, cytoplasmic OS=Mus musculus OX=10090 GN=Acss2 PE=1 SV=1	0	64623.6	51183.7	High	High
High	[R].GWSPPPEVR.[R]	1xPhospho [S3(100)]	4	2	A2AQN4	A2AQN4 [28-36]	A2AQN4 1xPhospho [S30(100)]	Acetyl-coenzyme A synthetase, cytoplasmic OS=Mus musculus OX=10090 GN=Acss2 PE=1 SV=1	0	774528	450710	High	High
High	[R].ESTESSPGKHLVTSEELISEGK.[W]	1xPhospho [T/S]	3	1	A2ATT5	A2ATT5 [5-26]		ADP-sugar pyrophosphatase (Fragment) OS=Mus musculus OX=10090 GN=Nudt5 PE=1 SV=1	1	30477.6	23388.9	High	Peak Found
High	[K].ETLLALLPGLSISAHQNYAEWLQEFK.[E]		2	1	A2AVJ7	A2AVJ7 [1124-1149]		Ribosome-binding protein 1 OS=Mus musculus OX=10090 GN=Rrbp1 PE=1 SV=1	0	268951		High	Not Found
High	[R].MEPAGSQGVWGLDDFQFLPFIWGSSQLIDHPHLEPR.[H]		3	1	A2AWE9	A2AWE9 [159-194]		Serine/threonine-protein phosphatase 2A activator OS=Mus musculus OX=10090 GN=Ptpa PE=1 SV=1	0	361049		High	Not Found
High	[R].SQAYADYIGFILTLNEGVK.[G]		2	2	A2AWE9	A2AWE9 [42-60]		Serine/threonine-protein phosphatase 2A activator OS=Mus musculus OX=10090 GN=Ptpa PE=1 SV=1	0	252006	135166	High	High
High	[-].MAAVILESIFLK.[R]	1xMet-loss+Acetyl [N-Term]	2	1	A2BDW0	A2BDW0 [1-12]	A2BDW0 1xMet-loss+Acetyl [N-Term]	Tyrosine-protein kinase OS=Mus musculus OX=10090 GN=Btk PE=1 SV=1	0	13119.4		High	Not Found
High	[R].VEVTEFEDIK.[S]		3	2	A2BE93	A2BE93 [122-131]		Protein SET (Fragment) OS=Mus musculus OX=10090 GN=Set PE=1 SV=1	0	49087.7	54688.2	High	High
High	[K].SASPGLPK.[G]	1xPhospho [S3(100)]	3	2	A2BE93	A2BE93 [28-35]	A2BE93 1xPhospho [S30(100)]	Protein SET (Fragment) OS=Mus musculus OX=10090 GN=Set PE=1 SV=1	0	665422	612613	High	High
High	[K].IPNFWVTTFVNHPQVSALLGEEDEEALHYLTR.[V]		3	1	A2BE93	A2BE93 [90-121]		Protein SET (Fragment) OS=Mus musculus OX=10090 GN=Set PE=1 SV=1	0	1.37667e+06	57030.8	High	Peak Found
High	[-].MAVANSSPVNPVVFFDVSIGGQEVGR.[M]	1xMet-loss+Acetyl [N-Term]	2	2	A2BGI9	A2BGI9 [1-26]	A2BGI9 1xMet-loss+Acetyl [N-Term]	Peptidyl-prolyl cis-trans isomerase OS=Mus musculus OX=10090 GN=Ppih PE=1 SV=1	0	52882.9	23513	High	High
High	[R].GPSPSPVGSPASVAQSR.[S]	1xPhospho [S3(100)]	2	1	A2BH40	A2BH40 [695-711]	A2BH40 1xPhospho [S697(100)]	AT-rich interactive domain-containing protein 1A OS=Mus musculus OX=10090 GN=Arid1a PE=1 SV=1	0	33358.1	25583.5	High	Peak Found
High	[R].GPSPSPVGSPASVAQSR.[S]	2xPhospho [S3(99.3); S9(93.6)]	2	2	A2BH40	A2BH40 [695-711]	A2BH40 2xPhospho [S697(99.3); S703(93.6)]	AT-rich interactive domain-containing protein 1A OS=Mus musculus OX=10090 GN=Arid1a PE=1 SV=1	0	15319.4	13014.1	High	High
High	[K].SGSGEMTSEGSHTK.[D]	1xPhospho [S/T]	1	1	A2RSJ4	A2RSJ4 [986-999]		UHRF1-binding protein 1-like OS=Mus musculus OX=10090 GN=Uhrf1bp1l PE=1 SV=2	0			High	Not Found
High	[R].LLSSSDDDANILSSPTDR.[S]	1xPhospho [T16(90.6)]	2	1	A6PW47	A6PW47 [877-894]	A6PW47 1xPhospho [T892(90.6)]	Mediator of RNA polymerase II transcription subunit 24 OS=Mus musculus OX=10090 GN=Med24 PE=1 SV=1	0	118817	85826.5	Peak Found	High
High	[R].QLLLTADDR.[V]		10	2	A6ZI44	A6ZI44 [115-123]		Fructose-bisphosphate aldolase OS=Mus musculus OX=10090 GN=Aldoa PE=1 SV=1	0	152389	200367	High	High
High	[R].VNPCIGGVILFHETLYQK.[A]	1xCarbamidomethyl [C4]	8	4	A6ZI44	A6ZI44 [124-141]		Fructose-bisphosphate aldolase OS=Mus musculus OX=10090 GN=Aldoa PE=1 SV=1	0	43933.5	25725.2	High	High
High	[K].ADDGRPFPQVIK.[S]		9	1	A6ZI44	A6ZI44 [142-153]		Fructose-bisphosphate aldolase OS=Mus musculus OX=10090 GN=Aldoa PE=1 SV=1	0	149147	83826.9	High	Peak Found
High	[K].DGADFAKWR.[C]		9	2	A6ZI44	A6ZI44 [195-203]		Fructose-bisphosphate aldolase OS=Mus musculus OX=10090 GN=Aldoa PE=1 SV=1	1	29495.7	23669.5	High	High
High	[K].IGEHTPSALAIMENANVLAR.[Y]		5	2	A6ZI44	A6ZI44 [208-227]		Fructose-bisphosphate aldolase OS=Mus musculus OX=10090 GN=Aldoa PE=1 SV=1	0	82651.7		High	Not Found
High	[K].FSNEEIAMATVTALR.[R]		4	1	A6ZI44	A6ZI44 [298-312]		Fructose-bisphosphate aldolase OS=Mus musculus OX=10090 GN=Aldoa PE=1 SV=1	0	141720	12301.1	High	Peak Found
High	[K].FSNEEIAMATVTALR.[R]	1xOxidation [M8]	4	1	A6ZI44	A6ZI44 [298-312]		Fructose-bisphosphate aldolase OS=Mus musculus OX=10090 GN=Aldoa PE=1 SV=1	0	15077.7	5426.81	High	Peak Found
High	[R].TVPPAVTGVTFLSGGQSEEEASINLNAINK.[C]		2	6	A6ZI44	A6ZI44 [314-343]		Fructose-bisphosphate aldolase OS=Mus musculus OX=10090 GN=Aldoa PE=1 SV=1	0	2.94355e+06	1.2079e+06	High	High
High	[K].AAQEEYIK.[R]		4	1	A6ZI44	A6ZI44 [377-384]		Fructose-bisphosphate aldolase OS=Mus musculus OX=10090 GN=Aldoa PE=1 SV=1	0	75380	85603.6	High	Peak Found
High	[K].YTPSGQSGAAASESLFISNHAY.[-]		2	1	A6ZI44	A6ZI44 [397-418]		Fructose-bisphosphate aldolase OS=Mus musculus OX=10090 GN=Aldoa PE=1 SV=1	0	275064	44997.3	High	Peak Found
High	[K].ELSDIAHR.[I]		9	3	A6ZI44	A6ZI44 [69-76]		Fructose-bisphosphate aldolase OS=Mus musculus OX=10090 GN=Aldoa PE=1 SV=1	0	39239.2	55842.1	High	High
High	[K].GILAADESTGSIAK.[R]		8	2	A6ZI44	A6ZI44 [83-96]		Fructose-bisphosphate aldolase OS=Mus musculus OX=10090 GN=Aldoa PE=1 SV=1	0	233598	244867	High	High
High	[K].GILAADESTGSIAK.[R]	1xPhospho [S11(99.9)]	8	5	A6ZI44	A6ZI44 [83-96]	A6ZI44 1xPhospho [S93(99.9)]	Fructose-bisphosphate aldolase OS=Mus musculus OX=10090 GN=Aldoa PE=1 SV=1	0	672870	595180	High	High
High	[K].GILAADESTGSIAKR.[L]	1xPhospho [S11(81.4)]	8	1	A6ZI44	A6ZI44 [83-97]	A6ZI44 1xPhospho [S93(81.4)]	Fructose-bisphosphate aldolase OS=Mus musculus OX=10090 GN=Aldoa PE=1 SV=1	1	200860	135195	High	Peak Found
High	[R].LQSIGTENTEENR.[R]		10	1	A6ZI44	A6ZI44 [98-110]		Fructose-bisphosphate aldolase OS=Mus musculus OX=10090 GN=Aldoa PE=1 SV=1	0	59882.3	56520.1	Peak Found	High
High	[K].AAVSGLWGK.[V]	1xPhospho [S4(100)]	2	1	A8DUK4	A8DUK4 [10-18]	A8DUK4 1xPhospho [S13(100)]	Beta-globin OS=Mus musculus OX=10090 GN=Hbb-bs PE=1 SV=1	0	6795.96	6940.72	High	Peak Found
High	[R].LLGNMIVIVLGHHLGK.[D]		2	2	A8DUK4	A8DUK4 [106-121]		Beta-globin OS=Mus musculus OX=10090 GN=Hbb-bs PE=1 SV=1	0	92828.2	10448.5	High	Peak Found
High	[-].MVHLTDAEK.[AS]	1xMet-loss [N-Term]	4	2	A8DUK4	A8DUK4 [1-9]	A8DUK4 1xMet-loss [N-Term]	Beta-globin OS=Mus musculus OX=10090 GN=Hbb-bs PE=1 SV=1	0	18410.9	45469.6	High	High
High	[K].VNADEVGGEALGR.[L]		2	2	A8DUK4	A8DUK4 [19-31]		Beta-globin OS=Mus musculus OX=10090 GN=Hbb-bs PE=1 SV=1	0	201553	206703	High	High
High	[R].LLVVYPWTQR.[YF]		5	2	A8DUK4	A8DUK4 [32-41]		Beta-globin OS=Mus musculus OX=10090 GN=Hbb-bs PE=1 SV=1	0	86149.3	14934.5	High	Peak Found
High	[R].YFDSFGDLSSASAIMGNAK.[V]	1xOxidation [M15]	3	2	A8DUK4	A8DUK4 [42-60]		Beta-globin OS=Mus musculus OX=10090 GN=Hbb-bs PE=1 SV=1	0	51401.9	4520.12	High	Peak Found
High	[R].QARSNHCSQSILQQQDHTTENLYDILK.[E]	1xCarbamidomethyl [C7]; 3xPhospho [T18(83.4); T19(76.1); S/Y]	1	1	B1ARH2	B1ARH2 [328-354]	B1ARH2 3xPhospho [T345(83.4); T346(76.1); S/Y]	Zinc finger protein 735 OS=Mus musculus OX=10090 GN=Zfp735 PE=4 SV=1	1	71445.3	91897.8	High	Peak Found
High	[R].LLDAEDVDVPSPDEK.[S]	1xPhospho [S11(100)]	12	2	B1ARU4	B1ARU4 [270-284]	B1ARU4 1xPhospho [S280(100)]	Microtubule-actin cross-linking factor 1 OS=Mus musculus OX=10090 GN=Macf1 PE=1 SV=1	0	31444.2	24852.3	High	High
High	[R].LNSQESDEEPQISDVPHISK.[G]	1xPhospho [S6(84.7)]	5	3	B1ARU4	B1ARU4 [3080-3099]	B1ARU4 1xPhospho [S3085(84.7)]	Microtubule-actin cross-linking factor 1 OS=Mus musculus OX=10090 GN=Macf1 PE=1 SV=1	0	328849	255471	High	High
High	[R].QGSFSEDVISHK.[G]	1xPhospho [S3(90.4)]	13	2	B1ARU4	B1ARU4 [3885-3896]	B1ARU4 1xPhospho [S3887(90.4)]	Microtubule-actin cross-linking factor 1 OS=Mus musculus OX=10090 GN=Macf1 PE=1 SV=1	0	59601	79447.4	High	High
High	[R].RSSDPSLNEK.[W]	1xPhospho [S3(99.2)]	5	2	B1ATD4	B1ATD4 [630-639]	B1ATD4 1xPhospho [S632(99.2)]	Myotubularin-related protein 3 (Fragment) OS=Mus musculus OX=10090 GN=Mtmr3 PE=1 SV=1	1	47763.5	38745.1	High	High
High	[K].STGDSQNLGSSSPGR.[K]	1xPhospho [S/T]	3	1	B1ATI9	B1ATI9 [88-102]		Growth arrest-specific protein 7 OS=Mus musculus OX=10090 GN=Gas7 PE=1 SV=1	0	27865.9	24582.6	High	Peak Found
High	[R].APSHVPFLLIGGGTAAFAAAR.[S]		2	1	B1AU25	B1AU25 [123-143]		Apoptosis-inducing factor 1, mitochondrial OS=Mus musculus OX=10090 GN=Aifm1 PE=1 SV=1	0	13364.7		High	Not Found
High	[R].LSPSTTTSDTPSLK.[G]	1xPhospho [S2(89.7)]	4	2	B1AVN9	B1AVN9 [203-216]	B1AVN9 1xPhospho [S204(89.7)]	Phosphatase and actin regulator OS=Mus musculus OX=10090 GN=Phactr2 PE=1 SV=2	0	14910.1	14123.8	High	High
High	[R].NQSPVLEPVGR.[S]	1xPhospho [S3(100)]	2	2	B1AXN9	B1AXN9 [685-695]	B1AXN9 1xPhospho [S687(100)]	Non-specific serine/threonine protein kinase OS=Mus musculus OX=10090 GN=Rps6ka3 PE=1 SV=1	0	38601.4	30541.2	High	High
High	[R].GGGQSSPQEEPTWK.[K]	1xPhospho [S/T]	4	1	B1AYU7	B1AYU7 [102-115]		Pre-mRNA-splicing factor CWC22 homolog OS=Mus musculus OX=10090 GN=Cwc22 PE=1 SV=1	0	39746.3	42141.5	Peak Found	High
High	[R].SDDESPSTSSGSSDADQRDPAAPEPEEQEER.[K]	1xPhospho [S/T]	3	1	B2FDH7	B2FDH7 [8-38]		Ubiquitin-conjugating enzyme E2 E3 (Fragment) OS=Mus musculus OX=10090 GN=Ube2e3 PE=1 SV=1	1	20894.6	14912.3	Peak Found	High
High	[R].TVEVETQGDDLQSLLFHFLDEWLYK.[F]		3	1	B2KGA7	B2KGA7 [75-99]		Protein archease OS=Mus musculus OX=10090 GN=Zbtb8os PE=1 SV=1	0	260539	36801.8	High	Peak Found
High	[R].LQRPKEESSEDENEVSNILR.[S]	2xPhospho [S8(100); S9(100)]	2	1	B2RRE7	B2RRE7 [1009-1028]	B2RRE7 2xPhospho [S1016(100); S1017(100)]	OTU domain-containing protein 4 OS=Mus musculus OX=10090 GN=Otud4 PE=1 SV=1	1	24128.2	7851.08	High	Peak Found
High	[K].EESSEDENEVSNILR.[S]	1xPhospho [S4(80.7)]	2	1	B2RRE7	B2RRE7 [1014-1028]	B2RRE7 1xPhospho [S1017(80.7)]	OTU domain-containing protein 4 OS=Mus musculus OX=10090 GN=Otud4 PE=1 SV=1	0			High	Not Found
High	[R].SGRSPTGNTPPVIDSVSEK.[G]	1xPhospho [S1(93.7)]	3	1	B2RUG9	B2RUG9 [2671-2689]	B2RUG9 1xPhospho [S2671(93.7)]	Adenomatosis polyposis coli OS=Mus musculus OX=10090 GN=Apc PE=1 SV=1	1	31088	13740.5	Peak Found	High
High	[K].QSVGSGSPVQTVGLETR.[L]	1xPhospho [S7(80.4)]	3	1	B2RUG9	B2RUG9 [2704-2720]	B2RUG9 1xPhospho [S2710(80.4)]	Adenomatosis polyposis coli OS=Mus musculus OX=10090 GN=Apc PE=1 SV=1	0	14502.1	8102.71	High	Peak Found
High	[K].HIVNHDDVFEESEELSSDEEMK.[M]	2xPhospho [S16(100); S17(100)]	3	1	B2RUJ2	B2RUJ2 [584-605]	B2RUJ2 2xPhospho [S599(100); S600(100)]	Erbb2ip protein OS=Mus musculus OX=10090 GN=Erbin PE=1 SV=1	0	21225.1	7573.85	High	Peak Found
High	[K].HIVNHDDVFEESEELSSDEEMK.[M]	1xPhospho [S]	3	1	B2RUJ2	B2RUJ2 [584-605]		Erbb2ip protein OS=Mus musculus OX=10090 GN=Erbin PE=1 SV=1	0			Not Found	High
High	[R].APTPGGGHPDSPGLPAPAGQQQR.[V]	1xPhospho [S11(99.5)]	1	1	B2RUJ5	B2RUJ5 [307-329]	B2RUJ5 1xPhospho [S317(99.5)]	Amyloid-beta A4 precursor protein-binding family A member 1 OS=Mus musculus OX=10090 GN=Apba1 PE=1 SV=2	0	27095.5	13969.6	High	Peak Found
High	[K].RSSDGSLSHEDLAK.[V]	1xPhospho [S6(99.7)]	2	1	B2RXQ2	B2RXQ2 [237-250]	B2RXQ2 1xPhospho [S242(99.7)]	Ppfia1 protein OS=Mus musculus OX=10090 GN=Ppfia1 PE=1 SV=1	1	53025.9	7159.02	High	Peak Found
High	[R].SSDGSLSHEDLAK.[V]	1xPhospho [S]	2	2	B2RXQ2	B2RXQ2 [238-250]		Ppfia1 protein OS=Mus musculus OX=10090 GN=Ppfia1 PE=1 SV=1	0	44880.2	39882.1	High	High
High	[K].AFGPGLQGGNAGSPAR.[F]	1xPhospho [S13(100)]	3	2	B7FAV1	B7FAV1 [1048-1063]	B7FAV1 1xPhospho [S1060(100)]	Filamin, alpha (Fragment) OS=Mus musculus OX=10090 GN=Flna PE=1 SV=1	0	88124.3	72883.7	High	High
High	[R].EATTEFSVDAR.[A]		3	1	B7FAV1	B7FAV1 [1249-1259]		Filamin, alpha (Fragment) OS=Mus musculus OX=10090 GN=Flna PE=1 SV=1	0	19165.9	27395.4	Peak Found	High
High	[R].GAGTGGLGLAVEGPSEAK.[M]		3	2	B7FAV1	B7FAV1 [1358-1375]		Filamin, alpha (Fragment) OS=Mus musculus OX=10090 GN=Flna PE=1 SV=1	0	34486.9	23129.4	High	High
High	[K].AGVAPLQVK.[V]		3	1	B7FAV1	B7FAV1 [1454-1462]		Filamin, alpha (Fragment) OS=Mus musculus OX=10090 GN=Flna PE=1 SV=1	0	15065.6	16640.6	Peak Found	High
High	[R].EGSYSISVLYGEEEVPR.[S]	1xPhospho [S3(100)]	3	3	B7FAV1	B7FAV1 [1492-1508]	B7FAV1 1xPhospho [S1494(100)]	Filamin, alpha (Fragment) OS=Mus musculus OX=10090 GN=Flna PE=1 SV=1	0	97604.8	88020.9	High	High
High	[R].EGSYSISVLYGEEEVPR.[S]		3	2	B7FAV1	B7FAV1 [1492-1508]		Filamin, alpha (Fragment) OS=Mus musculus OX=10090 GN=Flna PE=1 SV=1	0	41620.4	16087.7	High	High
High	[K].DAGEGLLAVQITDPEGKPK.[K]		3	2	B7FAV1	B7FAV1 [1550-1568]		Filamin, alpha (Fragment) OS=Mus musculus OX=10090 GN=Flna PE=1 SV=1	0	41419	26578.1	High	High
High	[R].DAGYGGLSLSIEGPSK.[V]		4	1	B7FAV1	B7FAV1 [2010-2025]		Filamin, alpha (Fragment) OS=Mus musculus OX=10090 GN=Flna PE=1 SV=1	0	32851.8	7287.38	High	Peak Found
High	[R].APSVANIGSHCDLSLK.[I]	1xCarbamidomethyl [C11]; 1xPhospho [S3(100)]	3	1	B7FAV1	B7FAV1 [2086-2101]	B7FAV1 1xPhospho [S2088(100)]	Filamin, alpha (Fragment) OS=Mus musculus OX=10090 GN=Flna PE=1 SV=1	0		26741	Not Found	High
High	[R].EAGAGGLAIAVEGPSK.[A]		4	2	B7FAV1	B7FAV1 [2201-2216]		Filamin, alpha (Fragment) OS=Mus musculus OX=10090 GN=Flna PE=1 SV=1	0	39398.9	24271.6	High	High
High	[R].VGEPGHGGDPGLVSAYGAGLEGGVTGSPAEFIVNTSNAGAGALSVTIDGPSK.[V]		3	2	B7FAV1	B7FAV1 [2356-2407]		Filamin, alpha (Fragment) OS=Mus musculus OX=10090 GN=Flna PE=1 SV=1	0	722825	609231	High	High
High	[R].AEFTVETR.[S]		4	1	B7FAV1	B7FAV1 [278-285]		Filamin, alpha (Fragment) OS=Mus musculus OX=10090 GN=Flna PE=1 SV=1	0		20056.8	Not Found	High
High	[K].SPFEVYVDK.[S]		4	2	B7FAV1	B7FAV1 [344-352]		Filamin, alpha (Fragment) OS=Mus musculus OX=10090 GN=Flna PE=1 SV=1	0	27393.8	29887.9	High	High
High	[K].VTAQGPGLEPSGNIANK.[T]		4	1	B7FAV1	B7FAV1 [360-376]		Filamin, alpha (Fragment) OS=Mus musculus OX=10090 GN=Flna PE=1 SV=1	0	15435.7	25816.3	Peak Found	High
High	[K].TTYFEIFTAGAGMGEVEVVIQDPTGQK.[G]		4	2	B7FAV1	B7FAV1 [377-403]		Filamin, alpha (Fragment) OS=Mus musculus OX=10090 GN=Flna PE=1 SV=1	0	383944	353610	High	High
High	[R].IANLQTDLSDGLR.[L]		4	1	B7FAV1	B7FAV1 [40-52]		Filamin, alpha (Fragment) OS=Mus musculus OX=10090 GN=Flna PE=1 SV=1	0	14726.9	12166.9	Peak Found	High
High	[K].DLGDGVYGFEYYPTIPGTYTVTITWGGQNIGR.[S]		3	2	B7FAV1	B7FAV1 [508-539]		Filamin, alpha (Fragment) OS=Mus musculus OX=10090 GN=Flna PE=1 SV=1	0	634730	236742	High	High
High	[K].SADFVVEAIGDDVGTLGFSVEGPSQAK.[I]		3	2	B7FAV1	B7FAV1 [570-596]		Filamin, alpha (Fragment) OS=Mus musculus OX=10090 GN=Flna PE=1 SV=1	0	1.94997e+06	1.19172e+06	High	High
High	[R].VNVGAGSHPNK.[V]		3	1	B7FAV1	B7FAV1 [737-747]		Filamin, alpha (Fragment) OS=Mus musculus OX=10090 GN=Flna PE=1 SV=1	0	6403.17	6862.06	Peak Found	High
High	[R].QMQLENVSVALEFLDR.[E]		4	1	B7FAV1	B7FAV1 [77-92]		Filamin, alpha (Fragment) OS=Mus musculus OX=10090 GN=Flna PE=1 SV=1	0			High	Not Found
High	[R].QMQLENVSVALEFLDRESIK.[L]		4	2	B7FAV1	B7FAV1 [77-96]		Filamin, alpha (Fragment) OS=Mus musculus OX=10090 GN=Flna PE=1 SV=1	1	230761	95811.4	High	High
High	[RK].NDNDTFTVK.[Y]		4	1	B7FAV1; Q8VHX6	B7FAV1 [805-813]; Q8VHX6 [825-833]		Filamin, alpha (Fragment) OS=Mus musculus OX=10090 GN=Flna PE=1 SV=1 Filamin-C OS=Mus musculus OX=10090 GN=Flnc PE=1 SV=3	0	10600.7	17030.7	Peak Found	High
High	[K].SPFSVGVSPSLDLSK.[I]		3	1	B7FAV1	B7FAV1 [935-949]		Filamin, alpha (Fragment) OS=Mus musculus OX=10090 GN=Flna PE=1 SV=1	0	17856.5	3115.77	High	Peak Found
High	[K].SPFSVGVSPSLDLSK.[I]	1xPhospho [S14(99.8)]	3	2	B7FAV1	B7FAV1 [935-949]	B7FAV1 1xPhospho [S948(99.8)]	Filamin, alpha (Fragment) OS=Mus musculus OX=10090 GN=Flna PE=1 SV=1	0	98968.2	59997.6	High	High
High	[R].EFITGDVEPTDAESAWHSENEEEDKLAGDMK.[N]	1xPhospho [S18(100)]	2	2	B7ZNL2	B7ZNL2 [108-138]	B7ZNL2 1xPhospho [S125(100)]	Nap1l4 protein OS=Mus musculus OX=10090 GN=Nap1l4 PE=1 SV=1	1	596713	417148	High	High
High	[R].EFITGDVEPTDAESAWHSENEEEDKLAGDMK.[N]	1xOxidation [M30]; 1xPhospho [S18(98.7)]	2	1	B7ZNL2	B7ZNL2 [108-138]	B7ZNL2 1xPhospho [S125(98.7)]	Nap1l4 protein OS=Mus musculus OX=10090 GN=Nap1l4 PE=1 SV=1	1	152307	79043.5	High	Peak Found
High	[-].MAENSLSDGGPADSVEAAK.[N]	1xMet-loss+Acetyl [N-Term]; 1xPhospho [S7(94.1)]	3	1	B7ZNL2	B7ZNL2 [1-19]	B7ZNL2 1xMet-loss+Acetyl [N-Term]; 1xPhospho [S7(94.1)]	Nap1l4 protein OS=Mus musculus OX=10090 GN=Nap1l4 PE=1 SV=1	0	24221.5	21287.1	High	Peak Found
High	[K].GIPEFWFTIFR.[N]		2	2	B7ZNL2	B7ZNL2 [158-168]		Nap1l4 protein OS=Mus musculus OX=10090 GN=Nap1l4 PE=1 SV=1	0	136896	18006.1	High	High
High	[K].ASGDGESLDEDSEFTLASDFEIGHFFR.[E]		3	2	B7ZNL2	B7ZNL2 [298-324]		Nap1l4 protein OS=Mus musculus OX=10090 GN=Nap1l4 PE=1 SV=1	0	142158	153540	High	High
High	[K].ASGDGESLDEDSEFTLASDFEIGHFFR.[E]	1xPhospho [S/T]	3	1	B7ZNL2	B7ZNL2 [298-324]		Nap1l4 protein OS=Mus musculus OX=10090 GN=Nap1l4 PE=1 SV=1	0	210732	129102	High	Peak Found
High	[-].MNASLVNAPK.[G]	1xMet-loss [N-Term]; 1xPhospho [S4(100)]	1	1	B8JJA7	B8JJA7 [1-10]	B8JJA7 1xMet-loss [N-Term]; 1xPhospho [S4(100)]	Zinc finger protein 942 OS=Mus musculus OX=10090 GN=Zfp942 PE=1 SV=1	0	6176.49	6685.7	Peak Found	High
High	[-].MAAGVEAAAEVAATEPK.[M]	1xMet-loss+Acetyl [N-Term]	3	1	B8JK33	B8JK33 [1-17]	B8JK33 1xMet-loss+Acetyl [N-Term]	Heterogeneous nuclear ribonucleoprotein M OS=Mus musculus OX=10090 GN=Hnrnpm PE=1 SV=1	0	27211.9	5250.16	High	Peak Found
High	[R].SATPANSDSESENFLR.[C]	1xPhospho [S9(85)]	2	2	B9EHX4	B9EHX4 [1889-1904]	B9EHX4 1xPhospho [S1897(85)]	Serine-protein kinase ATM OS=Mus musculus OX=10090 GN=Atm PE=1 SV=1	0	24980.2	16052.6	High	High
High	[R].SPTFEEGSQGTTISSLSEK.[S]	1xPhospho [S/T]	2	2	B9EHX4	B9EHX4 [1980-1998]		Serine-protein kinase ATM OS=Mus musculus OX=10090 GN=Atm PE=1 SV=1	0	45336.9	27692.6	High	High
High	[R].RDEQAASDPMDQETAVSR.[A]	1xPhospho [S7(100)]	1	1	B9EKJ3	B9EKJ3 [528-545]	B9EKJ3 1xPhospho [S534(100)]	Mon2 protein OS=Mus musculus OX=10090 GN=Mon2 PE=1 SV=1	1	18900		High	Not Found
High	[K].IVEPEVVGESDSEVEGDAWR.[L]	2xPhospho [S10(100); S12(100)]	1	1	C0HKD9	C0HKD9 [107-126]	C0HKD9 2xPhospho [S116(100); S118(100)]	Microfibrillar-associated protein 1B OS=Mus musculus OX=10090 GN=Mfap1b PE=1 SV=1	0	64545.7	68949.6	Peak Found	High
High	[R].SLAALDALNTDDENDEEEYEAWK.[V]	1xPhospho [T10(100)]	1	2	C0HKD9	C0HKD9 [258-280]	C0HKD9 1xPhospho [T267(100)]	Microfibrillar-associated protein 1B OS=Mus musculus OX=10090 GN=Mfap1b PE=1 SV=1	0	256070	162881	High	High
High	[R].SFADIGK.[K]	1xPhospho [S1(100)]	9	2	D3Y273	D3Y273 [238-244]	D3Y273 1xPhospho [S238(100)]	Anion exchange protein OS=Mus musculus OX=10090 GN=Slc4a7 PE=1 SV=2	0	30039.6	26984	High	High
High	[K].DVNQQEFVR.[A]		6	1	D3YUT3	D3YUT3 [8-16]		40S ribosomal protein S19 (Fragment) OS=Mus musculus OX=10090 GN=Rps19 PE=1 SV=2	0	13152.9	14234.3	High	Peak Found
High	[-].MSEGESQTVVSSGSDPK.[V]	1xMet-loss+Acetyl [N-Term]; 1xPhospho [S2(100)]	2	1	D3YUV1	D3YUV1 [1-17]	D3YUV1 1xMet-loss+Acetyl [N-Term]; 1xPhospho [S2(100)]	Nuclear receptor-binding protein OS=Mus musculus OX=10090 GN=Nrbp1 PE=1 SV=1	0	204365	163093	High	Peak Found
High	[K].TPTPEPAEVETR.[K]	1xPhospho [T]	2	1	D3YUV1	D3YUV1 [439-450]		Nuclear receptor-binding protein OS=Mus musculus OX=10090 GN=Nrbp1 PE=1 SV=1	0	163878	142875	Peak Found	High
High	[K].SLEEIYLFSLPIKESEIIDFFLGASLKDEVLK.[I]		3	2	D3YVC1	D3YVC1 [77-108]		40S ribosomal protein S2 (Fragment) OS=Mus musculus OX=10090 GN=Rps2 PE=1 SV=1	2	63385.6	37369	High	High
High	[K].ESEIIDFFLGASLKDEVLK.[I]		3	2	D3YVC1	D3YVC1 [90-108]		40S ribosomal protein S2 (Fragment) OS=Mus musculus OX=10090 GN=Rps2 PE=1 SV=1	1	427689	308365	High	High
High	[R].QLEDLVIEAVYADVLR.[G]		3	1	D3YVI6	D3YVI6 [127-142]		COP9 signalosome complex subunit 7a (Fragment) OS=Mus musculus OX=10090 GN=Cops7a PE=1 SV=1	0			High	Not Found
High	[K].SKEDLVSQGFTEFTIEDFHNTFMDLIEQVEK.[Q]		2	2	D3YWF6	D3YWF6 [91-121]		Ubiquitin thioesterase OTUB1 OS=Mus musculus OX=10090 GN=Otub1 PE=1 SV=1	1	278995	78230.5	High	High
High	[R].APTAALSPEPQDSK.[E]	1xPhospho [S7(98.3)]	3	1	D3YXK2	D3YXK2 [360-373]	D3YXK2 1xPhospho [S366(98.3)]	Scaffold attachment factor B1 OS=Mus musculus OX=10090 GN=Safb PE=1 SV=2	0	36474.3	40511.4	Peak Found	High
High	[R].NVTENVQSELAAMLVK.[F]		2	1	D3YXL0	D3YXL0 [43-58]		Coiled-coil domain-containing 170 OS=Mus musculus OX=10090 GN=Ccdc170 PE=1 SV=1	0			High	Not Found
High	[R].ASSLNFLNK.[S]	1xPhospho [S3(99)]	3	2	D3YXZ3	D3YXZ3 [575-583]	D3YXZ3 1xPhospho [S577(99)]	Kinesin light chain 2 OS=Mus musculus OX=10090 GN=Klc2 PE=1 SV=1	0	26069.9	21233.8	High	High
High	[K].AETSESSGSAPAVPEASASPK.[Q]	1xPhospho [S17(87.4)]	3	3	D3YY81	D3YY81 [62-82]	D3YY81 1xPhospho [S78(87.4)]	Methyl-CpG-binding protein 2 OS=Mus musculus OX=10090 GN=Mecp2 PE=1 SV=1	0	136695	107295	High	High
High	[K].ASVASDPESPPGGNEPAAASGQR.[L]	1xPhospho [S9(100)]	4	3	D3YYS7	D3YYS7 [7-29]	D3YYS7 1xPhospho [S15(100)]	mRNA cap guanine-N7 methyltransferase (Fragment) OS=Mus musculus OX=10090 GN=Rnmt PE=1 SV=1	0	437771	367959	High	High
High	[R].NSPMTISR.[L]	1xPhospho [S2(100)]	2	1	D3YZ08	D3YZ08 [397-404]	D3YZ08 1xPhospho [S398(100)]	Telomeric repeat-binding factor OS=Mus musculus OX=10090 GN=Terf2 PE=1 SV=1	0	18406.5	10001.3	High	Peak Found
High	[R].FSTFAGFLLFETK.[-]		2	1	D3YZ61	D3YZ61 [307-319]		Complement C1q tumor necrosis factor-related protein 3 OS=Mus musculus OX=10090 GN=C1qtnf3 PE=1 SV=1	0	80475		High	Not Found
High	[K].TLVITSTPASPNR.[E]	1xPhospho [S10(99.6)]	3	1	D3YZ86	D3YZ86 [207-219]	D3YZ86 1xPhospho [S216(99.6)]	Guanine nucleotide exchange factor for Rab-3A OS=Mus musculus OX=10090 GN=Rab3il1 PE=1 SV=2	0	13561.9	9293.64	High	Peak Found
High	[R].LTPTTPESSSTGTEDK.[S]	1xPhospho [T5(94.1)]	2	2	D3YZJ1	D3YZJ1 [268-283]	D3YZJ1 1xPhospho [T272(94.1)]	Sequestosome-1 OS=Mus musculus OX=10090 GN=Sqstm1 PE=1 SV=1	0	18484.1	22024.5	High	High
High	[K].LDQPVSAPPSPR.[D]	1xPhospho [S10(90.5)]	1	2	D3YZP9	D3YZP9 [228-239]	D3YZP9 1xPhospho [S237(90.5)]	Coiled-coil domain-containing protein 6 OS=Mus musculus OX=10090 GN=Ccdc6 PE=1 SV=1	0	39596.6	31078.2	High	High
High	[R].LIISSPSQR.[S]	1xPhospho [S7(98.7)]	3	1	D3Z197	D3Z197 [553-561]	D3Z197 1xPhospho [S559(98.7)]	Histone-lysine N-methyltransferase OS=Mus musculus OX=10090 GN=Nsd3 PE=1 SV=1	0	7416.23	9103.38	Peak Found	High
High	[R].SEKPAQSASSPEATSGSAGPVEK.[K]	1xPhospho [S/T]	3	1	D3Z197	D3Z197 [562-584]		Histone-lysine N-methyltransferase OS=Mus musculus OX=10090 GN=Nsd3 PE=1 SV=1	0	82678.1	61236.3	High	Peak Found
High	[R].LFLVNYTATIDAIYDMYTK.[M]		3	2	D3Z1H8	D3Z1H8 [152-170]		Glycolipid transfer protein OS=Mus musculus OX=10090 GN=Gltp PE=1 SV=1	0	455005	129283	High	High
High	[R].ATSPSSSVSGDFDDGHHSVPTPGPSR.[K]	1xPhospho [T/S]	13	1	D3Z1M8	D3Z1M8 [26-51]		Protein polybromo-1 (Fragment) OS=Mus musculus OX=10090 GN=Pbrm1 PE=1 SV=1	0	25685.6	14015	High	Peak Found
High	[K].QTTFEAQAFLEAVQFFR.[Q]		3	2	D3Z233	D3Z233 [204-220]		Family with sequence similarity 129, member A OS=Mus musculus OX=10090 GN=Fam129a PE=1 SV=1	0	273295	83553.2	High	High
High	[K].GTHFNFAIVFMDLK.[R]		4	1	D3Z2N9	D3Z2N9 [42-55]		Histone deacetylase complex subunit SAP18 OS=Mus musculus OX=10090 GN=Sap18 PE=1 SV=1	0	19117.3	4787.77	High	Peak Found
High	[R].GNVPSSELQIYTWMDATLK.[E]		3	1	D3Z2N9	D3Z2N9 [7-25]		Histone deacetylase complex subunit SAP18 OS=Mus musculus OX=10090 GN=Sap18 PE=1 SV=1	0			Not Found	High
High	[R].SPVLLPK.[G]	1xPhospho [S1(100)]	2	2	D3Z390	D3Z390 [504-510]	D3Z390 1xPhospho [S504(100)]	Protein bicaudal D homolog 2 OS=Mus musculus OX=10090 GN=Bicd2 PE=1 SV=2	0	258137	206099	High	High
High	[R].VTLTLPVLNAAQSIIFVATGEGK.[A]		3	1	D3Z4X1	D3Z4X1 [103-125]		6-phosphogluconolactonase OS=Mus musculus OX=10090 GN=Pgls PE=1 SV=1	0	489342	30676.7	High	Peak Found
High	[K].GVLLLDQEGGFWLVHSVPR.[F]		2	1	D3Z512	D3Z512 [97-115]		Deoxyribonuclease II alpha OS=Mus musculus OX=10090 GN=Dnase2a PE=1 SV=1	0	70001.6	6834.13	High	Peak Found
High	[K].AKPLSPEAQPK.[E]	1xPhospho [S5(100)]	2	1	D3Z5I9	D3Z5I9 [772-782]	D3Z5I9 1xPhospho [S776(100)]	RNA-binding protein 33 OS=Mus musculus OX=10090 GN=Rbm33 PE=1 SV=1	0	57248.4	54260.7	Peak Found	High
High	[R].ASGQAFELILSPR.[S]	1xPhospho [S11(100)]	3	1	D3Z5N2	D3Z5N2 [15-27]	D3Z5N2 1xPhospho [S25(100)]	Stathmin OS=Mus musculus OX=10090 GN=Stmn1 PE=1 SV=1	0	53959.2	42515.7	High	Peak Found
High	[R].ASGQAFELILSPR.[S]	2xPhospho [S2(100); S11(100)]	3	2	D3Z5N2	D3Z5N2 [15-27]	D3Z5N2 2xPhospho [S16(100); S25(100)]	Stathmin OS=Mus musculus OX=10090 GN=Stmn1 PE=1 SV=1	0	24645.7	21130	High	High
High	[R].SKESVPDFPLSPPK.[K]	1xPhospho [S11(100)]	3	1	D3Z5N2	D3Z5N2 [28-41]	D3Z5N2 1xPhospho [S38(100)]	Stathmin OS=Mus musculus OX=10090 GN=Stmn1 PE=1 SV=1	1	38950.7	27055.8	Peak Found	High
High	[K].ESVPDFPLSPPK.[K]	1xPhospho [S9(100)]	3	3	D3Z5N2	D3Z5N2 [30-41]	D3Z5N2 1xPhospho [S38(100)]	Stathmin OS=Mus musculus OX=10090 GN=Stmn1 PE=1 SV=1	0	75354.5	60096.1	High	High
High	[K].DLSLEEIQK.[K]	1xPhospho [S3(100)]	4	2	D3Z5N2	D3Z5N2 [44-52]	D3Z5N2 1xPhospho [S46(100)]	Stathmin OS=Mus musculus OX=10090 GN=Stmn1 PE=1 SV=1	0	48361.3	38154.2	High	High
High	[K].DLSLEEIQK.[K]		4	2	D3Z5N2	D3Z5N2 [44-52]		Stathmin OS=Mus musculus OX=10090 GN=Stmn1 PE=1 SV=1	0	62364.8	85126.1	High	High
High	[K].FDDSDTEQIAEEGDDNLAK.[Y]	1xPhospho [S4(82.6)]	1	2	D3Z5N5	D3Z5N5 [483-501]	D3Z5N5 1xPhospho [S486(82.6)]	1-phosphatidylinositol 3-phosphate 5-kinase OS=Mus musculus OX=10090 GN=Pikfyve PE=1 SV=2	0	21795.4	20587.5	High	High
High	[K].YTASVLIAESGQPVVPLDR.[Q]	2xPhospho [S/T/Y]	2	1	D3Z644	D3Z644 [68-86]		LisH domain-containing protein FOPNL OS=Mus musculus OX=10090 GN=Fopnl PE=4 SV=1	0			High	Not Found
High	[R].TPGPPSSQGSPVDTQPAAQK.[D]	1xPhospho [S/T]	6	1	D3Z656	D3Z656 [1115-1134]		Synaptojanin-1 OS=Mus musculus OX=10090 GN=Synj1 PE=1 SV=1	0	53482.9	44471.7	High	Peak Found
High	[R].SSQSLPSDSSPQLQVK.[I]	1xPhospho [S9(89.1)]	1	2	D3Z656	D3Z656 [1330-1345]	D3Z656 1xPhospho [S1338(89.1)]	Synaptojanin-1 OS=Mus musculus OX=10090 GN=Synj1 PE=1 SV=1	0	67193	53500.2	High	High
High	[K].SVLIMDGASAFGTIAIQLAHHR.[G]		6	1	D3Z6I4	D3Z6I4 [132-153]		Quinone oxidoreductase-like protein 1 OS=Mus musculus OX=10090 GN=Cryzl1 PE=1 SV=1	0	23239.8	13044	High	Peak Found
High	[K].MELQEIQLK.[E]		7	1	D3Z6I8	D3Z6I8 [105-113]		Tropomyosin alpha-3 chain OS=Mus musculus OX=10090 GN=Tpm3 PE=1 SV=1	0	51647.1	30075.6	Peak Found	High
High	[-].MAGTTTIEAVK.[R]	1xMet-loss+Acetyl [N-Term]	3	1	D3Z6I8	D3Z6I8 [1-11]	D3Z6I8 1xMet-loss+Acetyl [N-Term]	Tropomyosin alpha-3 chain OS=Mus musculus OX=10090 GN=Tpm3 PE=1 SV=1	0	167904	221317	Peak Found	High
High	[K].LVIIEGDLER.[T]		7	1	D3Z6I8	D3Z6I8 [133-142]		Tropomyosin alpha-3 chain OS=Mus musculus OX=10090 GN=Tpm3 PE=1 SV=1	0	69062.5	49610.5	Peak Found	High
High	[K].IQVLQQQADDAEER.[A]		3	2	D3Z6I8	D3Z6I8 [14-27]		Tropomyosin alpha-3 chain OS=Mus musculus OX=10090 GN=Tpm3 PE=1 SV=1	0	64353.6	68581.8	High	High
High	[R].EQAEAEVASLNR.[R]		2	2	D3Z6I8	D3Z6I8 [43-54]		Tropomyosin alpha-3 chain OS=Mus musculus OX=10090 GN=Tpm3 PE=1 SV=1	0	146830	163394	High	High
[truncated: 3,310 more rows]

## Sheet: Phosphopeptides
Confidence	Annotated Sequence	Modifications	# Proteins	# PSMs	Master Protein Accessions	Positions in Master Proteins	Modifications in Master Proteins	Master Protein Descriptions	# Missed Cleavages	Abundance_779257	Abundance_779258	Found in Sample_779257	Found in Sample_779258	WT/Vav	Fold change in Vav (log2)	Abundance in WT (log10)
[truncated: 1,659 more rows]

[truncated: 3 more sheets: All FC>2 proteins, Secretory pathway, FC>2 secretory pathway proteins]
